# Supplementary material for: Whole Exome- and mRNA-Sequencing of an AT/RT Case Reveals Few Somatic Mutations and Several Deregulated Signalling Pathways in the Context of SMARCB1 Deficiency
Source: Biomed Res Int. 2015 Aug 12;2015:862039. doi: 10.1155/2015/862039 (PMC4780067; doi:10.1155/2015/862039)
Supplement: Supplementary file 1 — Supl. Table 1A. Read mapping and coverage data. Exome-seq Data. Supl. Table 1B. Read mapping mRNA-seq data. Supl. Table 2. Germline variants with RNA variants and DE genes indicated. Supl. Table 3. Cuffdiff results, significantly DE genes with BMP-genes indicated. Supl. Table 4. Gene set overlap for up regulated genes. Supl. Table 5. Gene set overlap for down regulated genes. Supl. Table 6. GO for up regulated genes. Supl. Table 7. GO for down regulated genes. Supl. Fig. 1. FPKM values for the two CCDS SMARCB1 transcripts for AT/RT and Controls. NCBI accession nomenclature is used. Supl. Fig. 2. RNA reads alignment at exon 2 of SMARCB1. Genomic region Chr. 22: 24134055- 24134081 is indicated between the two red vertical lines. The yellow region on the top, represents exon 2, with introns on both sides, shown in blue. Aligned paired reads are shown in blue, while single reads are shown in red or green. Dotted lines connect each end of a read, that have been mapped across exon-exon boundaries. [file 862039.f1.zip › 862039 Supl table 3 Cuffdiff sign result incl Birks BMP genes (2).xlsx]

## Sheet: Sheet1
test_id	gene_id	gene	locus	sample_1	sample_2	status	value_1	value_2	log2(fold_change)	test_stat	p_value	q_value		BMP genes (Birks et al 2011)
XLOC_030076	XLOC_030076	IL2RB	chr22:37515125-37595425	s202	Ctrls	OK	9.98699	0.0142436	-9.45359	-0.113581	0.00215	0.0162065
XLOC_030875	XLOC_030875	COL8A1	chr3:99357318-99518070	s202	Ctrls	OK	128.492	0.27621	-8.8617	-2.25408	5e-05	0.000800523
XLOC_003932	XLOC_003932	S100A4	chr1:153516088-153522612	s202	Ctrls	OK	874.293	2.38662	-8.517	-8.56804	0.0006	0.00610906
XLOC_011746	XLOC_011746	KRT8	chr12:53290970-53346686	s202	Ctrls	OK	87.442	0.266519	-8.35794	-1.50026	5e-05	0.000800523
XLOC_043877	XLOC_043877	PI15	chr8:75512009-75779174	s202	Ctrls	OK	248.61	0.861168	-8.17338	-5.15706	0.00575	0.0338781
XLOC_010598	XLOC_010598	HMGA2	chr12:66151799-66360075	s202	Ctrls	OK	35.1629	0.129319	-8.08697	-1.68195	0.00115	0.0100961
XLOC_022215	XLOC_022215	CYP4F12	chr19:15783566-15807984	s202	Ctrls	OK	78.7458	0.386235	-7.67158	-1.9898	0.00025	0.00306111
XLOC_020190	XLOC_020190	CA4	chr17:58227301-58236902	s202	Ctrls	OK	457.024	2.29287	-7.63897	-10.2996	0.00035	0.00400446
XLOC_014892	XLOC_014892	FOXA1	chr14:38059188-38672128	s202	Ctrls	OK	21.7554	0.130217	-7.38431	-1.3845	0.00525	0.0315778
XLOC_009719	XLOC_009719	MPZL2	chr11:118124117-118135251	s202	Ctrls	OK	169.701	1.03094	-7.36289	-6.86877	0.00055	0.00572905
XLOC_025733	XLOC_025733	MATN3	chr2:20189977-20212455	s202	Ctrls	OK	496.415	3.25672	-7.25198	-7.57793	0.00015	0.00202358
XLOC_037538	XLOC_037538	LOX	chr5:121297655-121414206	s202	Ctrls	OK	373.566	2.60305	-7.16502	-5.69945	5e-05	0.000800523
XLOC_011621	XLOC_011621	COL2A1	chr12:48366747-48398269	s202	Ctrls	OK	87.8856	0.640722	-7.09978	-2.3108	5e-05	0.000800523
XLOC_015023	XLOC_015023	OTX2	chr14:57267425-57277197	s202	Ctrls	OK	57.9121	0.439461	-7.04199	-4.3634	5e-05	0.000800523
XLOC_010412	XLOC_010412	KRT18	chr12:53290970-53346686	s202	Ctrls	OK	59.981	0.516057	-6.86083	-3.29804	0.00405	0.0260713
XLOC_003430	XLOC_003430	GBP5	chr1:89724632-89738544	s202	Ctrls	OK	72.3188	0.707794	-6.6749	-4.62187	5e-05	0.000800523
XLOC_015007	XLOC_015007	DLGAP5	chr14:55614829-55658396	s202	Ctrls	OK	8.33926	0.0899578	-6.53453	-1.31235	0.0088	0.0467258
XLOC_007281	XLOC_007281	AC103801.2,GAS2	chr11:22644078-22834601	s202	Ctrls	OK	86.5145	0.938921	-6.52579	-2.53576	0.0013	0.0110709
XLOC_024540	XLOC_024540	SLC9A2	chr2:103236165-103327777	s202	Ctrls	OK	41.048	0.460857	-6.47685	-4.44704	5e-05	0.000800523
XLOC_042682	XLOC_042682	SAMD9	chr7:92728828-92747336	s202	Ctrls	OK	21.092	0.256832	-6.35973	-7.54845	0.00075	0.00720819
XLOC_010631	XLOC_010631	LYZ	chr12:69742120-69748014	s202	Ctrls	OK	79.9148	0.979053	-6.35093	-6.99757	0.0022	0.0165208
XLOC_034478	XLOC_034478	RBM47	chr4:40425271-40632892	s202	Ctrls	OK	101.579	1.27521	-6.31572	-5.39745	5e-05	0.000800523
XLOC_001420	XLOC_001420	CA14	chr1:150230168-150237478	s202	Ctrls	OK	100.974	1.29443	-6.28553	-7.89588	0.0002	0.00256581
XLOC_000476	XLOC_000476	LCK	chr1:32716839-32751766	s202	Ctrls	OK	16.615	0.216506	-6.26194	-1.50318	0.0003	0.00353406
XLOC_030562	XLOC_030562	CCR5	chr3:46406445-46448550	s202	Ctrls	OK	15.2707	0.202398	-6.23743	-5.35142	0.0054	0.032275
XLOC_020960	XLOC_020960	PTRF	chr17:40554467-40575338	s202	Ctrls	OK	324.388	4.50037	-6.17153	-7.9697	5e-05	0.000800523
XLOC_015054	XLOC_015054	SIX1	chr14:61110131-61124977	s202	Ctrls	OK	11.6624	0.16486	-6.14448	-1.55342	0.00705	0.0395903
XLOC_046003	XLOC_046003	ANXA1	chr9:75766672-75785309	s202	Ctrls	OK	725.625	11.3258	-6.00154	-8.5812	5e-05	0.000800523
XLOC_046751	XLOC_046751	CDKN2A	chr9:21802634-22121096	s202	Ctrls	OK	17.3582	0.277669	-5.9661	-1.0591	0.0041	0.0262741
XLOC_028547	XLOC_028547	SALL4	chr20:50400580-50419014	s202	Ctrls	OK	28.1427	0.45123	-5.96275	-3.20944	0.0052	0.0313529
XLOC_020812	XLOC_020812	SLFN13	chr17:33762114-33775856	s202	Ctrls	OK	22.294	0.366671	-5.92603	-2.31429	5e-05	0.000800523
XLOC_037591	XLOC_037591	FBN2	chr5:127593600-128369335	s202	Ctrls	OK	63.2053	1.13369	-5.80095	-5.55445	5e-05	0.000800523
XLOC_044614	XLOC_044614	SCARA5	chr8:27727398-27850244	s202	Ctrls	OK	32.1638	0.580702	-5.7915	-5.34513	5e-05	0.000800523
XLOC_008751	XLOC_008751	E2F8	chr11:19203577-19302973	s202	Ctrls	OK	5.72584	0.103788	-5.78577	-1.17693	0.00915	0.0482364
XLOC_020870	XLOC_020870	IKZF3	chr17:37913967-38020441	s202	Ctrls	OK	4.48481	0.0829264	-5.75707	-1.03986	5e-05	0.000800523
XLOC_015487	XLOC_015487	IGHM	chr14:106320348-106322323	s202	Ctrls	OK	119.877	2.22779	-5.7498	-8.05568	0.0006	0.00610906
XLOC_017134	XLOC_017134	ITGA11	chr15:68594049-68724502	s202	Ctrls	OK	30.5229	0.577721	-5.72337	-3.13753	5e-05	0.000800523
XLOC_018631	XLOC_018631	PPL	chr16:4932507-5069159	s202	Ctrls	OK	45.7554	0.875605	-5.70752	-5.56877	0.0042	0.0267169
XLOC_041661	XLOC_041661	MEST	chr7:130126045-130148500	s202	Ctrls	OK	1256.28	24.1933	-5.69842	-6.05654	5e-05	0.000800523
XLOC_003320	XLOC_003320	DEPDC1	chr1:68939834-69004310	s202	Ctrls	OK	7.32872	0.142666	-5.68285	-2.13198	0.0006	0.00610906
XLOC_035833	XLOC_035833	MARVELD2	chr5:68710938-68740157	s202	Ctrls	OK	19.3138	0.38341	-5.6546	-4.01822	5e-05	0.000800523
XLOC_045495	XLOC_045495	DMRT2	chr9:1050353-1057552	s202	Ctrls	OK	20.8399	0.423069	-5.62231	-3.78264	0.00325	0.0223234
XLOC_019639	XLOC_019639	HS3ST3B1	chr17:14204399-14252721	s202	Ctrls	OK	41.307	0.86216	-5.58229	-6.3962	5e-05	0.000800523
XLOC_007700	XLOC_007700	RARRES3	chr11:63304280-63313934	s202	Ctrls	OK	370.529	7.83792	-5.56297	-6.99679	5e-05	0.000800523
XLOC_043733	XLOC_043733	SOX17	chr8:55370494-55373448	s202	Ctrls	OK	50.2033	1.06296	-5.56163	-7.95539	0.00045	0.00488975
XLOC_008460	XLOC_008460	ANO9	chr11:417932-442011	s202	Ctrls	OK	2.97067	0.06313	-5.55632	-0.393052	0.00235	0.0172945
XLOC_013831	XLOC_013831	TRAC	chr14:23016446-23021083	s202	Ctrls	OK	39.673	0.850694	-5.54337	-5.89644	0.00865	0.0461883
XLOC_002632	XLOC_002632	C1orf127	chr1:11006527-11042094	s202	Ctrls	OK	3.10861	0.0670471	-5.53495	-0.614335	0.00575	0.0338781
XLOC_035835	XLOC_035835	OCLN	chr5:68773298-69006341	s202	Ctrls	OK	65.0191	1.41093	-5.52615	-3.94098	0.00045	0.00488975
XLOC_044076	XLOC_044076	CTHRC1	chr8:104383742-104395225	s202	Ctrls	OK	166.254	3.6385	-5.5139	-6.82909	0.0001	0.00146536
XLOC_028940	XLOC_028940	C21orf91	chr21:19135631-19639690	s202	Ctrls	OK	56.2168	1.24751	-5.49387	-4.60068	5e-05	0.000800523
XLOC_007422	XLOC_007422	CD82	chr11:44585976-44641913	s202	Ctrls	OK	650.445	14.6032	-5.47707	-5.53629	5e-05	0.000800523
XLOC_007606	XLOC_007606	FAM111B	chr11:58874657-58894883	s202	Ctrls	OK	4.23351	0.105487	-5.32671	-1.16378	0.00805	0.0438079
XLOC_046349	XLOC_046349	GSN	chr9:123940414-124095121	s202	Ctrls	OK	753.254	18.9779	-5.31074	-3.35663	0.00155	0.0126215
XLOC_025199	XLOC_025199	AOX1	chr2:201450590-201541787	s202	Ctrls	OK	11.5716	0.297405	-5.28202	-1.57447	0.0006	0.00610906
XLOC_006492	XLOC_006492	PRF1	chr10:72357103-72362531	s202	Ctrls	OK	18.0699	0.464531	-5.28167	-3.04692	0.0063	0.0362697
XLOC_027165	XLOC_027165	FZD5	chr2:208627309-208634287	s202	Ctrls	OK	36.1515	0.976262	-5.21064	-7.93009	5e-05	0.000800523
XLOC_005629	XLOC_005629	KIF11	chr10:94353042-94415150	s202	Ctrls	OK	15.4172	0.417092	-5.20803	-6.96624	0.0003	0.00353406
XLOC_043621	XLOC_043621	IDO1	chr8:39759793-39873910	s202	Ctrls	OK	12.7092	0.351007	-5.17823	-2.26542	0.00255	0.0184657
XLOC_006938	XLOC_006938	MKI67	chr10:129894922-129924649	s202	Ctrls	OK	10.6467	0.295842	-5.16943	-1.44801	0.00015	0.00202358
XLOC_037141	XLOC_037141	CENPK	chr5:64813592-64858998	s202	Ctrls	OK	22.8212	0.634364	-5.16892	-2.41535	5e-05	0.000800523
XLOC_019616	XLOC_019616	NTN1	chr17:8924858-9147317	s202	Ctrls	OK	145.625	4.0602	-5.16456	-7.05437	5e-05	0.000800523
XLOC_021057	XLOC_021057	HOXB3,HOXB4,HOXB6	chr17:46618255-46683776	s202	Ctrls	OK	1.38683	0.0406768	-5.09144	-0.232958	5e-05	0.000800523
XLOC_020201	XLOC_020201	TBX2	chr17:59477256-59486827	s202	Ctrls	OK	64.9438	1.99464	-5.02499	-6.29269	5e-05	0.000800523
XLOC_005349	XLOC_005349	CDK1	chr10:62538088-62554610	s202	Ctrls	OK	60.9749	1.88258	-5.01743	-5.27512	5e-05	0.000800523
XLOC_023614	XLOC_023614	NKG7	chr19:51874873-51875960	s202	Ctrls	OK	77.7503	2.42422	-5.00326	-6.02999	0.0013	0.0110709
XLOC_039543	XLOC_039543	HIST1H1C	chr6:26055967-26056699	s202	Ctrls	OK	94.418	2.96667	-4.99215	-8.58887	0.0012	0.0104065
XLOC_041993	XLOC_041993	TMEM184A	chr7:1583449-1600457	s202	Ctrls	OK	12.4844	0.39708	-4.97456	-2.13378	0.0002	0.00256581
XLOC_003898	XLOC_003898	S100A10	chr1:151955390-151966866	s202	Ctrls	OK	603.261	19.3362	-4.9634	-6.58931	5e-05	0.000800523
XLOC_003930	XLOC_003930	S100A6	chr1:153506078-153508720	s202	Ctrls	OK	1192.68	39.2602	-4.92499	-6.71243	5e-05	0.000800523
XLOC_035901	XLOC_035901	ANKDD1B	chr5:74907300-74967671	s202	Ctrls	OK	15.5182	0.516362	-4.90944	-4.88478	0.0023	0.017021
XLOC_002821	XLOC_002821	RUNX3	chr1:25226001-25291612	s202	Ctrls	OK	10.455	0.348262	-4.90788	-1.7579	0.00025	0.00306111
XLOC_009086	XLOC_009086	MS4A6A	chr11:59939080-59952139	s202	Ctrls	OK	101.636	3.39609	-4.9034	-4.76475	5e-05	0.000800523
XLOC_020935	XLOC_020935	KRT19	chr17:39679868-39684560	s202	Ctrls	OK	372.631	12.5953	-4.88679	-7.24035	5e-05	0.000800523
XLOC_011506	XLOC_011506	FAM60A	chr12:31433517-31479992	s202	Ctrls	OK	70.355	2.3797	-4.8858	-6.72788	5e-05	0.000800523
XLOC_038047	XLOC_038047	IRF4	chr6:391738-411447	s202	Ctrls	OK	4.632	0.157931	-4.87427	-1.05572	0.0027	0.0193197
XLOC_014801	XLOC_014801	GZMB	chr14:25064928-25126980	s202	Ctrls	OK	15.3854	0.525988	-4.87039	-2.41142	0.0008	0.00758608
XLOC_027288	XLOC_027288	PAX3	chr2:223064606-223169936	s202	Ctrls	OK	3.00994	0.104036	-4.85459	-0.849253	0.00095	0.00872149
XLOC_010141	XLOC_010141	PDE3A	chr12:20514665-20837315	s202	Ctrls	OK	37.3104	1.30072	-4.8422	-6.61428	5e-05	0.000800523
XLOC_026142	XLOC_026142	TGFA	chr2:70674411-70781325	s202	Ctrls	OK	52.3411	1.86607	-4.80987	-4.68771	5e-05	0.000800523
XLOC_020879	XLOC_020879	TOP2A	chr17:38544767-38574408	s202	Ctrls	OK	38.4715	1.37638	-4.80483	-7.18352	5e-05	0.000800523
XLOC_044943	XLOC_044943	LACTB2	chr8:71520811-71581409	s202	Ctrls	OK	16.8039	0.61061	-4.7824	-2.72099	0.0036	0.024103
XLOC_000617	XLOC_000617	CDC20	chr1:43824598-43828874	s202	Ctrls	OK	14.3664	0.52217	-4.78203	-3.28773	0.0036	0.024103
XLOC_014399	XLOC_014399	IFI27	chr14:94571181-94583033	s202	Ctrls	OK	970.338	35.5165	-4.77193	-6.30723	5e-05	0.000800523
XLOC_036543	XLOC_036543	HMMR	chr5:162887174-162921064	s202	Ctrls	OK	5.64489	0.209051	-4.75502	-1.43896	0.00035	0.00400446
XLOC_034179	XLOC_034179	TLR3	chr4:186990305-187006255	s202	Ctrls	OK	8.31058	0.310118	-4.74406	-3.1703	0.00075	0.00720819
XLOC_013672	XLOC_013672	ANG,RNASE4,RNASE4.1	chr14:21152258-21175279	s202	Ctrls	OK	87.1148	3.25791	-4.7409	-5.56489	5e-05	0.000800523
XLOC_026284	XLOC_026284	IGKC,IGKJ1	chr2:89109983-89165653	s202	Ctrls	OK	174.899	6.67006	-4.71268	-3.8619	0.00055	0.00572905
XLOC_023139	XLOC_023139	ASF1B	chr19:14230320-14247768	s202	Ctrls	OK	12.342	0.474632	-4.70062	-4.21643	0.0041	0.0262741
XLOC_011940	XLOC_011940	MDM1	chr12:68666222-68726161	s202	Ctrls	OK	161.376	6.28159	-4.68315	-6.36225	5e-05	0.000800523
XLOC_012349	XLOC_012349	OASL	chr12:121458120-121477045	s202	Ctrls	OK	12.7057	0.501071	-4.66431	-3.81281	0.0014	0.0116579
XLOC_007344	XLOC_007344	PRRG4	chr11:32851488-32879669	s202	Ctrls	OK	3.11566	0.125174	-4.63753	-4.6331	0.00695	0.0391725
XLOC_029561	XLOC_029561	APOL6	chr22:36044441-36057404	s202	Ctrls	OK	31.8526	1.28305	-4.63377	-5.77638	0.0003	0.00353406
XLOC_023642	XLOC_023642	ZNF321P,ZNF816	chr19:53430387-53466164	s202	Ctrls	OK	17.9303	0.731022	-4.61634	-2.70396	5e-05	0.000800523
XLOC_022516	XLOC_022516	CD177	chr19:43857824-43867480	s202	Ctrls	OK	17.797	0.731205	-4.60521	-3.07292	0.0015	0.0122848
XLOC_024711	XLOC_024711	GLI2	chr2:121493198-121750229	s202	Ctrls	OK	24.2087	1.00122	-4.5957	-3.8063	5e-05	0.000800523
XLOC_043231	XLOC_043231	SHH	chr7:155592679-155604967	s202	Ctrls	OK	9.78495	0.406654	-4.58869	-2.78782	0.0001	0.00146536
XLOC_027380	XLOC_027380	HJURP	chr2:234684369-234763212	s202	Ctrls	OK	12.5403	0.522069	-4.58619	-1.93777	0.001	0.00907991
XLOC_012642	XLOC_012642	FREM2	chr13:39261265-39460074	s202	Ctrls	OK	9.24102	0.386238	-4.58049	-3.17904	0.00015	0.00202358
XLOC_032861	XLOC_032861	LAMP3	chr3:182840000-182881627	s202	Ctrls	OK	3.90578	0.163749	-4.57605	-1.28185	0.00775	0.0426304
XLOC_035744	XLOC_035744	GPX8	chr5:54408798-54469005	s202	Ctrls	OK	34.7731	1.46777	-4.56627	-3.09639	0.00175	0.0138365
XLOC_007030	XLOC_007030	LSP1	chr11:1874199-1913497	s202	Ctrls	OK	23.1313	0.979545	-4.56159	-1.18817	5e-05	0.000800523
XLOC_026509	XLOC_026509	CKAP2L	chr2:113479062-113522254	s202	Ctrls	OK	5.97891	0.256364	-4.54362	-1.52768	0.0014	0.0116579
XLOC_033832	XLOC_033832	FGF2	chr4:123747862-123844123	s202	Ctrls	OK	67.0074	2.87642	-4.54198	-4.23919	5e-05	0.000800523
XLOC_011610	XLOC_011610	AMIGO2	chr12:47469489-47630443	s202	Ctrls	OK	120.881	5.23124	-4.5303	-6.26566	5e-05	0.000800523
XLOC_022214	XLOC_022214	CYP4F3	chr19:15751694-15773634	s202	Ctrls	OK	2.69932	0.119013	-4.5034	-3.35731	0.0066	0.0375726
XLOC_019884	XLOC_019884	SLFN5	chr17:33570085-33594739	s202	Ctrls	OK	16.7422	0.738319	-4.5031	-5.59374	5e-05	0.000800523
XLOC_018153	XLOC_018153	CETP	chr16:56995761-57017757	s202	Ctrls	OK	12.8998	0.574075	-4.48997	-4.10398	0.0021	0.0159505
XLOC_021334	XLOC_021334	LGALS3BP	chr17:76967337-76976061	s202	Ctrls	OK	314.469	14.0454	-4.48474	-6.7025	5e-05	0.000800523
XLOC_029619	XLOC_029619	APOBEC3C,APOBEC3D	chr22:39410087-39429256	s202	Ctrls	OK	20.9735	0.940845	-4.47846	-4.46079	0.00075	0.00720819
XLOC_020354	XLOC_020354	BIRC5	chr17:76210276-76221715	s202	Ctrls	OK	13.5043	0.605802	-4.47843	-3.08454	0.001	0.00907991
XLOC_002782	XLOC_002782	HSPG2	chr1:22138757-22263790	s202	Ctrls	OK	129.627	5.82781	-4.47527	-2.56861	0.0001	0.00146536
XLOC_025237	XLOC_025237	FZD7	chr2:202899309-202903160	s202	Ctrls	OK	64.7941	2.93437	-4.46474	-7.17786	5e-05	0.000800523
XLOC_012132	XLOC_012132	IKBIP	chr12:99007182-99038891	s202	Ctrls	OK	29.5199	1.347	-4.45386	-4.88095	0.0004	0.00445852
XLOC_036495	XLOC_036495	ITK	chr5:156512842-156682201	s202	Ctrls	OK	4.07806	0.186605	-4.44982	-0.922572	0.00375	0.0246998
XLOC_005098	XLOC_005098	MYO3A	chr10:26223195-26501456	s202	Ctrls	OK	6.37831	0.295344	-4.43271	-1.71515	0.0023	0.017021
XLOC_027144	XLOC_027144	GPR1	chr2:207040039-207082771	s202	Ctrls	OK	7.38106	0.341976	-4.43186	-1.65776	0.00105	0.00941355
XLOC_040377	XLOC_040377	SLC2A12	chr6:134309834-134373774	s202	Ctrls	OK	37.1643	1.72386	-4.4302	-6.49987	5e-05	0.000800523
XLOC_036369	XLOC_036369	PCDHB5	chr5:140514799-140517703	s202	Ctrls	OK	60.8735	2.83289	-4.42547	-6.93746	5e-05	0.000800523
XLOC_015403	XLOC_015403	WARS	chr14:100800124-100996640	s202	Ctrls	OK	1170.99	54.5913	-4.42291	-4.30888	5e-05	0.000800523
XLOC_019271	XLOC_019271	NQO1	chr16:69740898-69760854	s202	Ctrls	OK	181.776	8.48569	-4.42098	-5.79069	5e-05	0.000800523
XLOC_023643	XLOC_023643	ZNF702P	chr19:53471503-53496777	s202	Ctrls	OK	18.3168	0.856829	-4.41802	-5.27224	0.0008	0.00758608
XLOC_005037	XLOC_005037	MRC1	chr10:18098351-18200091	s202	Ctrls	OK	6.10282	0.28615	-4.41463	-4.76291	0.00225	0.0168074
XLOC_023637	XLOC_023637	ZNF600	chr19:53268746-53290034	s202	Ctrls	OK	14.232	0.671612	-4.40537	-5.24362	0.0015	0.0122848
XLOC_016974	XLOC_016974	MYO5C	chr15:52408770-52587995	s202	Ctrls	OK	41.6386	1.9838	-4.39158	-2.98106	0.0042	0.0267169
XLOC_006680	XLOC_006680	MYOF	chr10:95066185-95242074	s202	Ctrls	OK	72.32	3.45649	-4.38702	-3.96245	5e-05	0.000800523
XLOC_011333	XLOC_011333	KLRC4,KLRK1,RP11-277P12.7.1	chr12:10516367-10562745	s202	Ctrls	OK	16.739	0.803701	-4.38041	-3.40761	0.00025	0.00306111
XLOC_034907	XLOC_034907	DKK2	chr4:107842958-108223027	s202	Ctrls	OK	22.2473	1.0698	-4.37822	-3.40005	0.00015	0.00202358
XLOC_029620	XLOC_029620	APOBEC3F,APOBEC3G	chr22:39436608-39483748	s202	Ctrls	OK	38.5144	1.87356	-4.36154	-3.89763	5e-05	0.000800523
XLOC_007447	XLOC_007447	MDK	chr11:46402305-46405375	s202	Ctrls	OK	706.66	34.9105	-4.33929	-5.95925	5e-05	0.000800523
XLOC_013081	XLOC_013081	SKA3	chr13:21727733-21750741	s202	Ctrls	OK	5.01284	0.249019	-4.3313	-1.4084	0.0011	0.00977368
XLOC_047670	XLOC_047670	ENTPD2	chr9:139942549-139948497	s202	Ctrls	OK	137.731	6.88895	-4.32142	-7.12418	5e-05	0.000800523
XLOC_051283	XLOC_051283	MTM1	chrX:149737068-149841795	s202	Ctrls	OK	91.9783	4.63639	-4.31022	-6.03425	5e-05	0.000800523
XLOC_009966	XLOC_009966	LAG3	chr12:6881677-6887621	s202	Ctrls	OK	30.6767	1.55051	-4.30632	-4.42366	0.00045	0.00488975
XLOC_035281	XLOC_035281	DDX60	chr4:169137443-169239958	s202	Ctrls	OK	31.3353	1.59784	-4.29359	-3.46989	0.0001	0.00146536
XLOC_023821	XLOC_023821	RRM2	chr2:10262454-10271545	s202	Ctrls	OK	24.262	1.23846	-4.29208	-2.7813	0.00045	0.00488975
XLOC_030156	XLOC_030156	CENPM	chr22:42334724-42343168	s202	Ctrls	OK	11.8439	0.614555	-4.26846	-2.07385	0.00245	0.0179045
XLOC_023504	XLOC_023504	CCDC8	chr19:46913628-46916841	s202	Ctrls	OK	18.6199	0.990938	-4.2319	-4.82535	0.00035	0.00400446
XLOC_050282	XLOC_050282	TLR8	chrX:12920935-12941288	s202	Ctrls	OK	3.2479	0.173281	-4.22833	-4.57709	0.00395	0.0255766
XLOC_013234	XLOC_013234	ELF1	chr13:41506055-41658137	s202	Ctrls	OK	64.4306	3.45852	-4.21952	-4.23409	0.00185	0.014432
XLOC_017088	XLOC_017088	PIF1	chr15:65107830-65117867	s202	Ctrls	OK	16.2562	0.877081	-4.21213	-2.89692	0.00115	0.0100961
XLOC_029808	XLOC_029808	PRODH	chr22:18893540-18924066	s202	Ctrls	OK	318.665	17.2322	-4.20886	-3.58534	5e-05	0.000800523
XLOC_024342	XLOC_024342	TCF7L1	chr2:85360532-85537511	s202	Ctrls	OK	134.03	7.2521	-4.20801	-6.00069	5e-05	0.000800523
XLOC_038120	XLOC_038120	GCNT2	chr6:10492455-10629601	s202	Ctrls	OK	54.9522	2.97679	-4.20635	-2.37308	5e-05	0.000800523
XLOC_008770	XLOC_008770	SVIP	chr11:22835344-22966939	s202	Ctrls	OK	25.088	1.36408	-4.201	-3.49576	5e-05	0.000800523
XLOC_019829	XLOC_019829	PIPOX	chr17:27369917-27384234	s202	Ctrls	OK	63.5141	3.45819	-4.19899	-5.34973	5e-05	0.000800523
XLOC_040774	XLOC_040774	AHR	chr7:17319457-17385776	s202	Ctrls	OK	27.7837	1.51623	-4.19568	-4.02486	5e-05	0.000800523
XLOC_009146	XLOC_009146	PLA2G16	chr11:63340666-63389143	s202	Ctrls	OK	205.261	11.3414	-4.17779	-5.33895	5e-05	0.000800523
XLOC_021396	XLOC_021396	TYMS	chr18:596997-712676	s202	Ctrls	OK	61.0844	3.37771	-4.17669	-4.24127	0.0087	0.0463309
XLOC_029575	XLOC_029575	APOL1	chr22:36649055-36663576	s202	Ctrls	OK	59.5722	3.30089	-4.17371	-5.15323	5e-05	0.000800523
XLOC_008622	XLOC_008622	GVINP1	chr11:6735570-6767650	s202	Ctrls	OK	3.34215	0.185801	-4.16895	-1.98349	0.008	0.0436433
XLOC_024289	XLOC_024289	HK2	chr2:75061107-75120486	s202	Ctrls	OK	46.891	2.61524	-4.1643	-5.47262	5e-05	0.000800523
XLOC_002796	XLOC_002796	E2F2	chr1:23832921-23857712	s202	Ctrls	OK	3.36918	0.188127	-4.16262	-2.07387	0.00445	0.0279231
XLOC_021181	XLOC_021181	BRIP1	chr17:59759984-59940755	s202	Ctrls	OK	2.40735	0.135365	-4.15252	-4.1095	0.0093	0.048833
XLOC_037046	XLOC_037046	EMB	chr5:49692025-49739082	s202	Ctrls	OK	14.945	0.846447	-4.1421	-5.1744	5e-05	0.000800523
XLOC_003426	XLOC_003426	GBP1	chr1:89518001-89531043	s202	Ctrls	OK	122.085	6.92006	-4.14096	-5.19361	5e-05	0.000800523
XLOC_051821	XLOC_051821	EDA2R	chrX:65815478-65859108	s202	Ctrls	OK	15.6012	0.889487	-4.13254	-4.87805	5e-05	0.000800523
XLOC_015937	XLOC_015937	CASC5	chr15:40886217-40956540	s202	Ctrls	OK	6.76763	0.386852	-4.1288	-1.20561	0.00265	0.0190511
XLOC_037428	XLOC_037428	ST8SIA4	chr5:100145356-100238970	s202	Ctrls	OK	45.9989	2.62976	-4.1286	-6.18579	5e-05	0.000800523
XLOC_020213	XLOC_020213	MRC2	chr17:60704761-60770956	s202	Ctrls	OK	65.7015	3.77219	-4.12245	-5.673	5e-05	0.000800523
XLOC_047355	XLOC_047355	KLF4	chr9:110247132-110252763	s202	Ctrls	OK	85.0475	4.91702	-4.11241	-5.62274	5e-05	0.000800523
XLOC_024086	XLOC_024086	EPCAM	chr2:47572296-47614740	s202	Ctrls	OK	179.001	10.3614	-4.11068	-5.53183	5e-05	0.000800523
XLOC_035234	XLOC_035234	FAM198B	chr4:159045625-159176563	s202	Ctrls	OK	82.9189	4.81098	-4.1073	-5.10594	5e-05	0.000800523
XLOC_028577	XLOC_028577	BMP7	chr20:55743803-55841685	s202	Ctrls	OK	177.882	10.3321	-4.10572	-4.8165	5e-05	0.000800523		BMP7
XLOC_038262	XLOC_038262	BTN2A3P	chr6:26421618-26431928	s202	Ctrls	OK	7.2179	0.419924	-4.10338	-2.01324	0.003	0.0209389
XLOC_038890	XLOC_038890	MANEA	chr6:96025418-96057333	s202	Ctrls	OK	18.8166	1.09664	-4.10083	-3.17434	0.0002	0.00256581
XLOC_016111	XLOC_016111	TEX9	chr15:56536206-56757335	s202	Ctrls	OK	9.69147	0.565626	-4.0988	-2.48875	0.0008	0.00758608
XLOC_038253	XLOC_038253	HIST1H2AE	chr6:26217164-26217711	s202	Ctrls	OK	42.8179	2.51558	-4.08925	-7.15319	0.00535	0.0320726
XLOC_027872	XLOC_027872	SLC2A10	chr20:45338125-45364965	s202	Ctrls	OK	51.9929	3.06064	-4.08641	-4.28577	5e-05	0.000800523
XLOC_007176	XLOC_007176	WEE1	chr11:9595227-9615004	s202	Ctrls	OK	135.074	8.03829	-4.07072	-3.85723	5e-05	0.000800523
XLOC_046805	XLOC_046805	B4GALT1	chr9:33104079-33179981	s202	Ctrls	OK	80.0515	4.77043	-4.06874	-6.53221	5e-05	0.000800523
XLOC_043140	XLOC_043140	RP11-61L23.2.1	chr7:143318042-143534026	s202	Ctrls	OK	2.35363	0.140683	-4.06437	-0.606994	0.0086	0.0460202
XLOC_034885	XLOC_034885	CENPE	chr4:104026962-104119566	s202	Ctrls	OK	4.22065	0.252735	-4.06177	-1.15793	0.0023	0.017021
XLOC_010085	XLOC_010085	EMP1	chr12:13349649-13369708	s202	Ctrls	OK	287.242	17.2224	-4.05991	-5.42596	5e-05	0.000800523
XLOC_001182	XLOC_001182	C1orf88	chr1:111888909-111895635	s202	Ctrls	OK	17.4106	1.04532	-4.05795	-3.40318	0.0026	0.0187662
XLOC_008781	XLOC_008781	LGR4	chr11:27387507-27503980	s202	Ctrls	OK	91.2865	5.49074	-4.05533	-6.27493	5e-05	0.000800523
XLOC_021506	XLOC_021506	DSG2	chr18:29078026-29128813	s202	Ctrls	OK	9.25478	0.558345	-4.05097	-5.28758	0.0004	0.00445852
XLOC_016248	XLOC_016248	THSD4	chr15:71389290-72075722	s202	Ctrls	OK	18.4339	1.12212	-4.03806	-3.56849	0.0012	0.0104065
XLOC_004392	XLOC_004392	KIF14	chr1:200520627-200589862	s202	Ctrls	OK	2.47435	0.150695	-4.03735	-4.54288	0.00145	0.0119789
XLOC_004412	XLOC_004412	PTPN7	chr1:202116140-202130716	s202	Ctrls	OK	9.81896	0.599799	-4.03302	-1.70142	5e-05	0.000800523
XLOC_019946	XLOC_019946	CDC6	chr17:38443884-38459171	s202	Ctrls	OK	22.5229	1.38005	-4.0286	-5.34837	5e-05	0.000800523
XLOC_031024	XLOC_031024	EAF2	chr3:121554029-121605373	s202	Ctrls	OK	57.3767	3.52625	-4.02426	-4.79387	0.00075	0.00720819
XLOC_009487	XLOC_009487	NOX4	chr11:89057523-89322779	s202	Ctrls	OK	5.48315	0.340929	-4.00746	-1.21033	0.00055	0.00572905
XLOC_031034	XLOC_031034	PARP15	chr3:122296448-122357894	s202	Ctrls	OK	2.62218	0.163773	-4.001	-1.47663	0.00095	0.00872149
XLOC_044551	XLOC_044551	DOK2	chr8:21766383-21771371	s202	Ctrls	OK	14.0239	0.883026	-3.98929	-1.71006	0.0014	0.0116579
XLOC_037624	XLOC_037624	C5orf15	chr5:133291200-133304478	s202	Ctrls	OK	185.688	11.6951	-3.98891	-6.78733	5e-05	0.000800523
XLOC_042680	XLOC_042680	CDK6	chr7:92234234-92546501	s202	Ctrls	OK	27.1662	1.71387	-3.98649	-2.83203	5e-05	0.000800523
XLOC_020810	XLOC_020810	SLFN11	chr17:33677323-33700642	s202	Ctrls	OK	25.1376	1.58786	-3.98469	-3.48422	0.0001	0.00146536
XLOC_020551	XLOC_020551	AURKB	chr17:8108050-8113936	s202	Ctrls	OK	9.7972	0.623749	-3.97333	-3.44788	0.00475	0.0292426
XLOC_030942	XLOC_030942	CD96	chr3:111011565-111384597	s202	Ctrls	OK	5.64399	0.35939	-3.97309	-1.82171	0.00435	0.0274952
XLOC_045699	XLOC_045699	ANXA2P2	chr9:33624222-33625532	s202	Ctrls	OK	206.504	13.1633	-3.97158	-6.99958	5e-05	0.000800523
XLOC_040356	XLOC_040356	CTGF	chr6:132269315-132398533	s202	Ctrls	OK	233.976	14.9371	-3.96939	-6.25792	5e-05	0.000800523
XLOC_015859	XLOC_015859	ARHGAP11A	chr15:32905933-32932150	s202	Ctrls	OK	28.6234	1.82992	-3.96734	-3.95915	0.00025	0.00306111
XLOC_050496	XLOC_050496	CHST7	chrX:46433218-46457843	s202	Ctrls	OK	107.589	6.88565	-3.9658	-8.30263	5e-05	0.000800523
XLOC_037786	XLOC_037786	CD74	chr5:149781199-149792492	s202	Ctrls	OK	743.112	47.9834	-3.95297	-5.17499	5e-05	0.000800523
XLOC_016731	XLOC_016731	TRPM1	chr15:31293263-31453476	s202	Ctrls	OK	0.787679	0.0509936	-3.94922	-0.301734	0.00405	0.0260713
XLOC_044524	XLOC_044524	MSR1	chr8:15965386-16424999	s202	Ctrls	OK	25.5433	1.66127	-3.94259	-2.85611	5e-05	0.000800523
XLOC_026777	XLOC_026777	NMI	chr2:152126978-152146571	s202	Ctrls	OK	22.8554	1.48672	-3.94233	-3.52715	0.0009	0.00832395
XLOC_051419	XLOC_051419	KAL1	chrX:8496914-8700227	s202	Ctrls	OK	87.0924	5.66988	-3.94116	-5.31822	5e-05	0.000800523
XLOC_031403	XLOC_031403	FNDC3B	chr3:171757417-172119455	s202	Ctrls	OK	68.6353	4.4793	-3.93761	-3.67504	5e-05	0.000800523
XLOC_000826	XLOC_000826	USP1	chr1:62901967-62917475	s202	Ctrls	OK	116.324	7.63061	-3.9302	-6.42179	5e-05	0.000800523
XLOC_039732	XLOC_039732	HLA-DQB1	chr6:32627243-32636160	s202	Ctrls	OK	48.4927	3.18664	-3.92766	-1.25219	0.0025	0.0181631
XLOC_028560	XLOC_028560	ZNF217	chr20:52169308-52251129	s202	Ctrls	OK	23.8735	1.57284	-3.92397	-5.02827	5e-05	0.000800523
XLOC_039895	XLOC_039895	CLIC5	chr6:45848749-46048132	s202	Ctrls	OK	27.103	1.78733	-3.92257	-4.30145	5e-05	0.000800523
XLOC_026849	XLOC_026849	IFIH1	chr2:163123588-163175213	s202	Ctrls	OK	29.1937	1.94301	-3.90929	-4.96369	5e-05	0.000800523
XLOC_039568	XLOC_039568	HIST1H2BK	chr6:27106072-27114619	s202	Ctrls	OK	189.841	12.8181	-3.88854	-5.10777	5e-05	0.000800523
XLOC_007632	XLOC_007632	MS4A4A	chr11:60048013-60076445	s202	Ctrls	OK	42.9764	2.92412	-3.87747	-4.71775	5e-05	0.000800523
XLOC_051856	XLOC_051856	IL2RG	chrX:70327253-70331958	s202	Ctrls	OK	23.4401	1.61074	-3.86318	-3.51363	0.00025	0.00306111
XLOC_004465	XLOC_004465	NUAK2	chr1:205271186-205290883	s202	Ctrls	OK	23.4701	1.6188	-3.85783	-5.48209	0.0001	0.00146536
XLOC_032626	XLOC_032626	WWTR1	chr3:149235021-149454501	s202	Ctrls	OK	159.117	11.0175	-3.85222	-4.40021	5e-05	0.000800523
XLOC_001646	XLOC_001646	SLAMF7	chr1:160709036-160724611	s202	Ctrls	OK	5.53475	0.385973	-3.84195	-1.74664	0.00045	0.00488975
XLOC_038811	XLOC_038811	TPBG	chr6:83072922-83080545	s202	Ctrls	OK	34.1961	2.43149	-3.81392	-5.23407	5e-05	0.000800523
XLOC_046215	XLOC_046215	GALNT12	chr9:101569980-101634560	s202	Ctrls	OK	24.3574	1.73197	-3.81387	-4.60596	5e-05	0.000800523
XLOC_023117	XLOC_023117	DNASE2	chr19:12986022-12992335	s202	Ctrls	OK	53.4457	3.80633	-3.8116	-5.23023	5e-05	0.000800523
XLOC_030883	XLOC_030883	TMEM45A	chr3:100211462-100296288	s202	Ctrls	OK	25.6855	1.83103	-3.81023	-4.38773	0.00025	0.00306111
XLOC_025100	XLOC_025100	ITGA4	chr2:182321618-182400914	s202	Ctrls	OK	11.0755	0.791953	-3.80581	-2.90286	5e-05	0.000800523
XLOC_039702	XLOC_039702	CLIC1,DDAH2	chr6:31694814-31707540	s202	Ctrls	OK	9.27914	0.66646	-3.7994	-2.95483	0.00025	0.00306111
XLOC_021306	XLOC_021306	ST6GALNAC2	chr17:74561460-74582145	s202	Ctrls	OK	7.15344	0.514648	-3.79698	-4.45221	0.00315	0.0217719
XLOC_035081	XLOC_035081	SLC7A11	chr4:138948575-139163503	s202	Ctrls	OK	48.4672	3.48865	-3.79627	-6.5839	5e-05	0.000800523
XLOC_028154	XLOC_028154	JAG1	chr20:10618331-10654608	s202	Ctrls	OK	72.0627	5.19029	-3.79537	-5.77231	5e-05	0.000800523
XLOC_019572	XLOC_019572	ACAP1	chr17:7239847-7254797	s202	Ctrls	OK	7.25575	0.524598	-3.78984	-4.62425	0.00175	0.0138365
XLOC_041899	XLOC_041899	GIMAP7	chr7:150211917-150218161	s202	Ctrls	OK	17.1369	1.25362	-3.77294	-5.05338	0.00205	0.0156185
XLOC_001074	XLOC_001074	PALMD	chr1:100111498-100160097	s202	Ctrls	OK	90.7278	6.64913	-3.77031	-5.65308	5e-05	0.000800523
XLOC_012823	XLOC_012823	KLF5	chr13:73629113-73651676	s202	Ctrls	OK	49.8146	3.65666	-3.76797	-4.9974	5e-05	0.000800523
XLOC_010335	XLOC_010335	PRPH	chr12:49686413-49725514	s202	Ctrls	OK	57.91	4.25217	-3.76754	-3.30761	0.0009	0.00832395
XLOC_012911	XLOC_012911	SOX21-AS1	chr13:95364969-95366749	s202	Ctrls	OK	23.5667	1.73151	-3.76665	-5.88538	0.00115	0.0100961
XLOC_030301	XLOC_030301	IL17RC	chr3:9958757-9975314	s202	Ctrls	OK	107.119	7.88683	-3.76363	-3.76843	5e-05	0.000800523
XLOC_006987	XLOC_006987	IFITM1,IFITM2	chr11:307630-315272	s202	Ctrls	OK	1723.17	129.091	-3.73861	-5.88545	5e-05	0.000800523
XLOC_015345	XLOC_015345	ASB2	chr14:94400498-94443137	s202	Ctrls	OK	5.4175	0.407412	-3.73307	-1.50026	0.00285	0.0201537
XLOC_022263	XLOC_022263	IFI30	chr19:18284578-18288927	s202	Ctrls	OK	216.899	16.3258	-3.73179	-6.65106	5e-05	0.000800523
XLOC_007840	XLOC_007840	MYEOV	chr11:69061604-69182494	s202	Ctrls	OK	1.36624	0.10289	-3.73104	-0.318388	0.00215	0.0162065
XLOC_009176	XLOC_009176	BATF2	chr11:64755414-64764517	s202	Ctrls	OK	11.9646	0.903425	-3.72723	-3.05199	0.0022	0.0165208
XLOC_001430	XLOC_001430	ADAMTSL4,AL356356.1	chr1:150521039-150533413	s202	Ctrls	OK	44.9597	3.42277	-3.7154	-4.82954	5e-05	0.000800523
XLOC_026492	XLOC_026492	BUB1	chr2:111395274-111435691	s202	Ctrls	OK	9.66627	0.738128	-3.71102	-2.50413	5e-05	0.000800523
XLOC_050577	XLOC_050577	CLCN5	chrX:49687224-49863892	s202	Ctrls	OK	17.1907	1.31617	-3.70721	-5.39807	5e-05	0.000800523
XLOC_025357	XLOC_025357	IGFBP2	chr2:217497550-217529159	s202	Ctrls	OK	564.261	43.4307	-3.69957	-4.46979	5e-05	0.000800523
XLOC_044699	XLOC_044699	FGFR1	chr8:38268655-38326352	s202	Ctrls	OK	447.299	34.4409	-3.69904	-2.84497	0.0004	0.00445852
XLOC_027033	XLOC_027033	STAT1	chr2:191745522-191885686	s202	Ctrls	OK	247.895	19.1274	-3.69602	-2.45537	0.00715	0.0400163
XLOC_010644	XLOC_010644	LGR5	chr12:71518864-71980090	s202	Ctrls	OK	29.1193	2.24756	-3.69554	-3.24197	0.0002	0.00256581
XLOC_004037	XLOC_004037	FCRL3	chr1:157644110-157670775	s202	Ctrls	OK	4.04243	0.31234	-3.69403	-1.10739	0.00115	0.0100961
XLOC_008364	XLOC_008364	ROBO3	chr11:124735281-124751366	s202	Ctrls	OK	343.91	26.6198	-3.69146	-4.29575	5e-05	0.000800523
XLOC_010789	XLOC_010789	RP11-778J16.1.1	chr12:94942016-94943312	s202	Ctrls	OK	12.8126	0.991929	-3.69119	-4.19101	0.0047	0.0290427
XLOC_018668	XLOC_018668	EMP2	chr16:10622278-10674555	s202	Ctrls	OK	102.885	7.99575	-3.68565	-3.90584	5e-05	0.000800523
XLOC_001974	XLOC_001974	PTPRC	chr1:198607800-198726545	s202	Ctrls	OK	33.9286	2.65118	-3.6778	-3.10389	5e-05	0.000800523
XLOC_035724	XLOC_035724	ITGA2	chr5:51971026-52390609	s202	Ctrls	OK	6.62301	0.519884	-3.67123	-2.781	0.00565	0.0334874
XLOC_041336	XLOC_041336	STEAP2	chr7:89511666-89870091	s202	Ctrls	OK	29.5081	2.34434	-3.65386	-4.05522	0.0001	0.00146536
XLOC_030175	XLOC_030175	A4GALT	chr22:43088126-43117304	s202	Ctrls	OK	28.9997	2.30515	-3.65311	-4.03018	0.00035	0.00400446
XLOC_039060	XLOC_039060	GJA1	chr6:121756790-121770873	s202	Ctrls	OK	618.93	49.2175	-3.65253	-4.92979	5e-05	0.000800523
XLOC_025796	XLOC_025796	OTOF	chr2:26680070-26781566	s202	Ctrls	OK	8.63003	0.686415	-3.65221	-2.01948	0.00095	0.00872149
XLOC_021556	XLOC_021556	SKA1	chr18:47901364-47920543	s202	Ctrls	OK	2.7612	0.219732	-3.65148	-1.80377	0.00305	0.0212506
XLOC_047094	XLOC_047094	PTAR1	chr9:72324437-72374875	s202	Ctrls	OK	56.5086	4.51209	-3.6466	-4.81586	5e-05	0.000800523
XLOC_021382	XLOC_021382	SECTM1	chr17:80278899-80291921	s202	Ctrls	OK	36.6452	2.95876	-3.63056	-5.09	0.0004	0.00445852
XLOC_026193	XLOC_026193	FAM176A	chr2:75696427-75796848	s202	Ctrls	OK	3.63122	0.293479	-3.62912	-1.00954	0.0003	0.00353406
XLOC_032604	XLOC_032604	ZIC4	chr3:147103832-147228080	s202	Ctrls	OK	56.3277	4.56558	-3.62498	-2.03048	0.00335	0.0228759
XLOC_036180	XLOC_036180	ZNF474	chr5:121464456-121518353	s202	Ctrls	OK	1.36236	0.1107	-3.62138	-0.364477	0.0071	0.0397812
XLOC_026260	XLOC_026260	CD8A	chr2:87011728-87035519	s202	Ctrls	OK	38.1933	3.11262	-3.61712	-4.94497	5e-05	0.000800523
XLOC_004865	XLOC_004865	RP11-488L18.10.1	chr1:247350582-247351828	s202	Ctrls	OK	26.0851	2.13196	-3.61297	-5.30289	0.0006	0.00610906
XLOC_044812	XLOC_044812	LYPLA1	chr8:54958937-55014577	s202	Ctrls	OK	80.8809	6.62986	-3.60875	-4.96978	5e-05	0.000800523
XLOC_038246	XLOC_038246	HIST1H2BD	chr6:26158348-26171577	s202	Ctrls	OK	120.573	9.88443	-3.6086	-6.71574	0.00015	0.00202358
XLOC_033275	XLOC_033275	FAM114A1	chr4:38869297-38947360	s202	Ctrls	OK	30.8166	2.52699	-3.60822	-4.69758	5e-05	0.000800523
XLOC_004369	XLOC_004369	ASPM	chr1:197053257-197115824	s202	Ctrls	OK	6.59719	0.544325	-3.59931	-4.33093	0.00015	0.00202358
XLOC_047191	XLOC_047191	GAS1	chr9:89559278-89562104	s202	Ctrls	OK	67.5824	5.58282	-3.59758	-6.20877	5e-05	0.000800523
XLOC_036228	XLOC_036228	ISOC1	chr5:128430385-128449721	s202	Ctrls	OK	170.356	14.1309	-3.59162	-6.00964	5e-05	0.000800523
XLOC_031182	XLOC_031182	C3orf72	chr3:138666075-138672293	s202	Ctrls	OK	3.92227	0.325846	-3.58943	-2.57632	0.00275	0.0195719
XLOC_035227	XLOC_035227	PDGFC	chr4:157681605-157892546	s202	Ctrls	OK	76.3844	6.37243	-3.58336	-4.78769	5e-05	0.000800523
XLOC_038934	XLOC_038934	AIM1	chr6:106808783-107018335	s202	Ctrls	OK	2.35652	0.19685	-3.58149	-1.70128	0.00465	0.0288054
XLOC_037138	XLOC_037138	ADAMTS6	chr5:64444562-64777747	s202	Ctrls	OK	15.5122	1.31563	-3.55958	-3.72412	5e-05	0.000800523
XLOC_025766	XLOC_025766	TP53I3	chr2:24299395-24397874	s202	Ctrls	OK	106.663	9.04973	-3.55905	-3.52892	0.00025	0.00306111
XLOC_001872	XLOC_001872	MR1	chr1:181003066-181031074	s202	Ctrls	OK	13.3612	1.13381	-3.5588	-2.45005	0.0015	0.0122848
XLOC_026698	XLOC_026698	CXCR4	chr2:136871918-136875735	s202	Ctrls	OK	224.195	19.0279	-3.55856	-6.29803	5e-05	0.000800523
XLOC_045078	XLOC_045078	TMEM64	chr8:91634222-91997485	s202	Ctrls	OK	41.7751	3.5599	-3.55273	-2.77308	0.0021	0.0159505
XLOC_039105	XLOC_039105	EYA4	chr6:133561735-133853258	s202	Ctrls	OK	2.44507	0.209426	-3.54536	-0.988225	0.0001	0.00146536
XLOC_046700	XLOC_046700	BNC2	chr9:16416403-16870841	s202	Ctrls	OK	1.93914	0.166429	-3.54244	-0.781323	0.00045	0.00488975
XLOC_003867	XLOC_003867	CTSS	chr1:150702550-150738433	s202	Ctrls	OK	62.1833	5.36972	-3.53361	-3.31948	0.00045	0.00488975
XLOC_009116	XLOC_009116	AHNAK	chr11:62201015-62323719	s202	Ctrls	OK	62.6238	5.42231	-3.52973	-2.62404	0.0006	0.00610906
XLOC_023182	XLOC_023182	PLVAP	chr19:17462263-17488148	s202	Ctrls	OK	11.1538	0.966594	-3.52848	-4.75149	0.00145	0.0119789
XLOC_031766	XLOC_031766	SGOL1	chr3:20202084-20227919	s202	Ctrls	OK	2.95326	0.257004	-3.52245	-1.33731	0.0003	0.00353406
XLOC_027679	XLOC_027679	TPX2	chr20:30327073-30389608	s202	Ctrls	OK	20.6237	1.79535	-3.52196	-5.08644	5e-05	0.000800523
XLOC_026776	XLOC_026776	RBM43	chr2:152104453-152118393	s202	Ctrls	OK	10.6187	0.924563	-3.52169	-3.84576	0.0008	0.00758608
XLOC_009937	XLOC_009937	RAD51AP1	chr12:4647949-4669214	s202	Ctrls	OK	10.75	0.942483	-3.51172	-2.79901	5e-05	0.000800523
XLOC_004529	XLOC_004529	NEK2	chr1:211836113-211848960	s202	Ctrls	OK	8.47318	0.744295	-3.50896	-1.9549	0.00545	0.0325055
XLOC_034797	XLOC_034797	HSD17B11,HSD17B13	chr4:88224940-88312538	s202	Ctrls	OK	215.935	19.0822	-3.5003	-5.65792	5e-05	0.000800523
XLOC_021769	XLOC_021769	AC016839.1	chr18:23713815-23773319	s202	Ctrls	OK	10.0191	0.8867	-3.49816	-3.55111	0.00705	0.0395903
XLOC_044437	XLOC_044437	PPP1R3B	chr8:8993764-9009084	s202	Ctrls	OK	12.0164	1.06793	-3.49212	-5.14017	5e-05	0.000800523
XLOC_038458	XLOC_038458	HLA-DRA	chr6:32407618-32412823	s202	Ctrls	OK	28.6315	2.55578	-3.48577	-4.07624	0.00105	0.00941355
XLOC_011390	XLOC_011390	PLBD1	chr12:14656594-14910897	s202	Ctrls	OK	20.008	1.80254	-3.47247	-3.83102	0.00125	0.010751
XLOC_005617	XLOC_005617	PCGF5	chr10:92979907-93044088	s202	Ctrls	OK	73.1523	6.62111	-3.46576	-3.64368	5e-05	0.000800523
XLOC_032128	XLOC_032128	SUCLG2	chr3:67410883-67705038	s202	Ctrls	OK	28.5217	2.58381	-3.46449	-4.80289	5e-05	0.000800523
XLOC_032080	XLOC_032080	IL17RD	chr3:57124009-57204334	s202	Ctrls	OK	147.136	13.345	-3.46278	-4.25842	0.0002	0.00256581
XLOC_042840	XLOC_042840	SYPL1	chr7:105730948-105753022	s202	Ctrls	OK	242.81	22.1483	-3.45456	-5.43999	5e-05	0.000800523
XLOC_000535	XLOC_000535	CDCA8	chr1:38158089-38175391	s202	Ctrls	OK	6.49455	0.594321	-3.44991	-4.07556	0.0026	0.0187662
XLOC_029713	XLOC_029713	GTSE1	chr22:46692637-46726707	s202	Ctrls	OK	9.45566	0.867326	-3.44653	-3.0166	0.00155	0.0126215
XLOC_046115	XLOC_046115	CKS2	chr9:91926112-91931618	s202	Ctrls	OK	121.695	11.1862	-3.44347	-6.40521	0.0003	0.00353406
XLOC_034989	XLOC_034989	PDE5A	chr4:120375945-120550146	s202	Ctrls	OK	31.539	2.89974	-3.44314	-1.81446	0.00515	0.031127
XLOC_020811	XLOC_020811	SLFN12	chr17:33738078-33760218	s202	Ctrls	OK	3.93697	0.36257	-3.44075	-1.5436	0.00655	0.0373414
XLOC_018685	XLOC_018685	LITAF	chr16:11641581-11680806	s202	Ctrls	OK	202.18	18.7179	-3.43315	-5.72218	5e-05	0.000800523
XLOC_021890	XLOC_021890	LMAN1	chr18:56995054-57026503	s202	Ctrls	OK	84.9309	7.8727	-3.43136	-6.14723	5e-05	0.000800523
XLOC_042550	XLOC_042550	MLXIPL	chr7:73007523-73038873	s202	Ctrls	OK	54.9094	5.10104	-3.42819	-3.88365	0.0001	0.00146536
XLOC_002798	XLOC_002798	ID3	chr1:23884408-23886285	s202	Ctrls	OK	334.657	31.145	-3.42561	-5.20166	5e-05	0.000800523		ID3
XLOC_031926	XLOC_031926	CDCP1	chr3:45123769-45187914	s202	Ctrls	OK	5.66836	0.528304	-3.42349	-3.34127	0.00015	0.00202358
XLOC_015955	XLOC_015955	NUSAP1	chr15:41624891-41673248	s202	Ctrls	OK	33.126	3.0905	-3.42205	-3.12474	0.00025	0.00306111
XLOC_034468	XLOC_034468	UGDH	chr4:39500374-39640710	s202	Ctrls	OK	117.397	10.9572	-3.42144	-4.20592	0.0001	0.00146536
XLOC_016367	XLOC_016367	KIAA1024	chr15:79724857-79764632	s202	Ctrls	OK	15.2872	1.42812	-3.42013	-5.29431	5e-05	0.000800523
XLOC_042640	XLOC_042640	SEMA3D	chr7:84624868-84816171	s202	Ctrls	OK	4.19367	0.392404	-3.4178	-3.22975	0.00075	0.00720819
XLOC_032550	XLOC_032550	RBP1	chr3:139108656-139396859	s202	Ctrls	OK	320.077	30.0203	-3.41441	-3.96124	5e-05	0.000800523
XLOC_036367	XLOC_036367	PCDHB3	chr5:140480233-140483406	s202	Ctrls	OK	8.19063	0.769362	-3.41224	-4.41896	0.0014	0.0116579
XLOC_021801	XLOC_021801	ZNF396	chr18:32946660-32957301	s202	Ctrls	OK	3.15867	0.296947	-3.41104	-3.38636	0.0084	0.0451687
XLOC_037989	XLOC_037989	COL23A1	chr5:177664618-178017556	s202	Ctrls	OK	18.302	1.72635	-3.4062	-5.12224	0.00025	0.00306111
XLOC_021222	XLOC_021222	CEP112	chr17:63631655-64188194	s202	Ctrls	OK	11.374	1.07464	-3.40382	-4.05848	0.0004	0.00445852
XLOC_024483	XLOC_024483	NCAPH	chr2:97001524-97039583	s202	Ctrls	OK	7.1904	0.679632	-3.40325	-2.27774	0.00205	0.0156185
XLOC_021627	XLOC_021627	SOCS6	chr18:67956167-67997436	s202	Ctrls	OK	41.5427	3.93427	-3.40043	-5.86372	5e-05	0.000800523
XLOC_010619	XLOC_010619	RAP1B	chr12:69004618-69054372	s202	Ctrls	OK	137.546	13.0332	-3.39966	-3.85084	5e-05	0.000800523
XLOC_042683	XLOC_042683	SAMD9L	chr7:92759367-92777682	s202	Ctrls	OK	29.151	2.77218	-3.39445	-3.68685	5e-05	0.000800523
XLOC_021293	XLOC_021293	ACOX1	chr17:73937595-74002080	s202	Ctrls	OK	121.063	11.591	-3.38467	-4.79408	5e-05	0.000800523
XLOC_038259	XLOC_038259	BTN3A2	chr6:26365386-26378546	s202	Ctrls	OK	44.0876	4.23238	-3.38083	-3.66119	5e-05	0.000800523
XLOC_038773	XLOC_038773	CD109	chr6:74405257-74538040	s202	Ctrls	OK	4.13017	0.397755	-3.37625	-1.13686	0.0062	0.0358392
XLOC_004076	XLOC_004076	TAGLN2	chr1:159887896-159895522	s202	Ctrls	OK	607.227	58.5916	-3.37347	-5.28062	5e-05	0.000800523
XLOC_045764	XLOC_045764	MELK	chr9:36572858-36677678	s202	Ctrls	OK	8.26758	0.799986	-3.36942	-2.89082	0.0002	0.00256581
XLOC_023553	XLOC_023553	PLEKHA4	chr19:49340354-49371884	s202	Ctrls	OK	11.3963	1.1078	-3.36279	-3.72861	0.00075	0.00720819
XLOC_008466	XLOC_008466	MIR210HG	chr11:565659-568457	s202	Ctrls	OK	24.9398	2.43888	-3.35416	-2.32793	0.00535	0.0320726
XLOC_024498	XLOC_024498	ZAP70	chr2:98330022-98356325	s202	Ctrls	OK	9.11437	0.891776	-3.35339	-2.25662	0.00365	0.0243803
XLOC_006666	XLOC_006666	FGFBP3	chr10:93666345-93669240	s202	Ctrls	OK	164.594	16.1632	-3.34813	-5.98841	5e-05	0.000800523
XLOC_004091	XLOC_004091	CD84	chr1:160506862-160549306	s202	Ctrls	OK	6.30283	0.622142	-3.34068	-2.61199	5e-05	0.000800523
XLOC_019556	XLOC_019556	FAM64A	chr17:6347760-6354382	s202	Ctrls	OK	10.8528	1.07712	-3.33282	-3.50107	0.0036	0.024103
XLOC_006886	XLOC_006886	RP11-572P18.1.1	chr10:122114176-122114718	s202	Ctrls	OK	115.358	11.4786	-3.32909	-4.17671	0.0001	0.00146536
XLOC_037440	XLOC_037440	NUDT12	chr5:102884555-102898494	s202	Ctrls	OK	28.5219	2.83889	-3.32867	-4.50681	5e-05	0.000800523
XLOC_011258	XLOC_011258	C1R,C1RL	chr12:7187512-7275097	s202	Ctrls	OK	144.431	14.5675	-3.30956	-3.92535	5e-05	0.000800523
XLOC_038052	XLOC_038052	FOXF2	chr6:1390068-1395832	s202	Ctrls	OK	25.2493	2.54841	-3.30857	-5.79162	0.00055	0.00572905
XLOC_023175	XLOC_023175	CPAMD8	chr19:17003757-17137625	s202	Ctrls	OK	5.74963	0.58035	-3.30847	-3.66158	0.0005	0.00529702
XLOC_022981	XLOC_022981	PLAC2	chr19:5558177-5568045	s202	Ctrls	OK	51.354	5.2091	-3.30137	-5.41076	5e-05	0.000800523
XLOC_040755	XLOC_040755	ARL4A	chr7:12726480-12730559	s202	Ctrls	OK	129.875	13.1856	-3.30009	-4.60505	5e-05	0.000800523
XLOC_015347	XLOC_015347	IFI27L2	chr14:94594115-94596590	s202	Ctrls	OK	269.064	27.3286	-3.29947	-4.70923	5e-05	0.000800523
XLOC_006425	XLOC_006425	RTKN2	chr10:63942793-64028466	s202	Ctrls	OK	5.3679	0.545825	-3.29785	-3.46543	0.0005	0.00529702
XLOC_008594	XLOC_008594	TRIM5	chr11:5684424-5959849	s202	Ctrls	OK	29.7549	3.04632	-3.28799	-1.80374	0.0033	0.0225888
XLOC_046809	XLOC_046809	AQP3	chr9:33441151-33447609	s202	Ctrls	OK	17.969	1.84141	-3.28663	-2.41691	0.00155	0.0126215
XLOC_006710	XLOC_006710	TLL2	chr10:98124362-98273675	s202	Ctrls	OK	4.34478	0.445329	-3.28634	-2.38076	0.0031	0.0214861
XLOC_025780	XLOC_025780	POMC	chr2:25383721-25391772	s202	Ctrls	OK	17.5668	1.80694	-3.28123	-2.71241	0.00435	0.0274952
XLOC_011115	XLOC_011115	TMEM132C	chr12:128751947-129192460	s202	Ctrls	OK	21.6752	2.23288	-3.27907	-4.74134	5e-05	0.000800523
XLOC_036166	XLOC_036166	TNFAIP8	chr5:118604386-118730294	s202	Ctrls	OK	11.8439	1.22228	-3.2765	-2.74403	0.0037	0.0244352
XLOC_042892	XLOC_042892	TFEC	chr7:115575201-115799950	s202	Ctrls	OK	4.72522	0.488138	-3.27502	-1.16763	0.0033	0.0225888
XLOC_021431	XLOC_021431	TWSG1	chr18:9334764-9402418	s202	Ctrls	OK	28.0724	2.9151	-3.26754	-5.03705	5e-05	0.000800523		TWSG1
XLOC_051938	XLOC_051938	HMGN5	chrX:80369199-80457441	s202	Ctrls	OK	25.9637	2.69975	-3.2656	-2.95995	0.0023	0.017021
XLOC_031409	XLOC_031409	ECT2	chr3:172468471-172539264	s202	Ctrls	OK	25.4089	2.64301	-3.26508	-3.22787	5e-05	0.000800523
XLOC_005390	XLOC_005390	TET1	chr10:70320412-70454239	s202	Ctrls	OK	10.2183	1.06323	-3.26462	-2.9148	0.00225	0.0168074
XLOC_027011	XLOC_027011	TFPI	chr2:187866602-188430487	s202	Ctrls	OK	39.8476	4.14654	-3.26451	-2.74528	0.00085	0.00795026
XLOC_039161	XLOC_039161	GPR126	chr6:142622990-142767403	s202	Ctrls	OK	31.206	3.25403	-3.26152	-3.66468	5e-05	0.000800523
XLOC_009585	XLOC_009585	PDGFD	chr11:103777913-104035107	s202	Ctrls	OK	8.9548	0.93974	-3.25233	-3.79431	0.00045	0.00488975
XLOC_042383	XLOC_042383	FKBP9L	chr7:55748766-55780945	s202	Ctrls	OK	6.88552	0.724277	-3.24895	-2.7624	0.0012	0.0104065
XLOC_012537	XLOC_012537	TNFRSF19	chr13:24144508-24250232	s202	Ctrls	OK	49.1715	5.17742	-3.24752	-5.13751	5e-05	0.000800523
XLOC_047119	XLOC_047119	ALDH1A1	chr9:75515577-75695358	s202	Ctrls	OK	116.583	12.299	-3.24474	-4.4071	5e-05	0.000800523
XLOC_000370	XLOC_000370	FAM110D	chr1:26485510-26489119	s202	Ctrls	OK	7.28479	0.770363	-3.24128	-4.4815	0.0081	0.0439717
XLOC_019148	XLOC_019148	CCDC102A	chr16:57546089-57570511	s202	Ctrls	OK	11.4386	1.21263	-3.23769	-3.00662	0.0037	0.0244352
XLOC_029545	XLOC_029545	TIMP3	chr22:32908538-33454358	s202	Ctrls	OK	216.869	23.0336	-3.23501	-4.76957	5e-05	0.000800523
XLOC_018086	XLOC_018086	NOD2	chr16:50727513-50766988	s202	Ctrls	OK	5.66234	0.602068	-3.2334	-1.49934	0.0012	0.0104065
XLOC_025033	XLOC_025033	ITGA6	chr2:173292081-173489823	s202	Ctrls	OK	85.6266	9.12191	-3.23065	-2.41669	0.0013	0.0110709
XLOC_032888	XLOC_032888	IGF2BP2	chr3:185361526-185542844	s202	Ctrls	OK	73.8191	7.8667	-3.23016	-3.76968	0.0001	0.00146536
XLOC_010035	XLOC_010035	RP11-726G1.1.1	chr12:9620147-9728864	s202	Ctrls	OK	1.94798	0.208647	-3.22284	-3.38025	0.00715	0.0400163
XLOC_015005	XLOC_015005	WDHD1	chr14:55405667-55493823	s202	Ctrls	OK	9.52106	1.02117	-3.22089	-3.23578	0.00035	0.00400446
XLOC_035673	XLOC_035673	OSMR	chr5:38845959-39074510	s202	Ctrls	OK	41.9696	4.50583	-3.21948	-2.96481	0.002	0.015302
XLOC_003934	XLOC_003934	S100A2	chr1:153533583-153540366	s202	Ctrls	OK	8.53995	0.918222	-3.21731	-1.86012	0.00495	0.0301565
XLOC_038655	XLOC_038655	CENPQ	chr6:49431095-49460820	s202	Ctrls	OK	10.3638	1.11796	-3.21262	-3.69975	0.0029	0.0203841
XLOC_007607	XLOC_007607	FAM111A	chr11:58897605-58922512	s202	Ctrls	OK	40.8217	4.40874	-3.2109	-3.39951	5e-05	0.000800523
XLOC_009178	XLOC_009178	CDCA5	chr11:64833771-64851636	s202	Ctrls	OK	12.3683	1.33613	-3.21052	-2.59112	0.0001	0.00146536
XLOC_038219	XLOC_038219	GMNN	chr6:24775158-24786327	s202	Ctrls	OK	43.5757	4.70979	-3.20979	-4.21715	0.0001	0.00146536
XLOC_032326	XLOC_032326	CD200R1	chr3:112640055-112693969	s202	Ctrls	OK	1.85261	0.200863	-3.20527	-1.57204	0.00925	0.0486218
XLOC_008137	XLOC_008137	YAP1	chr11:101981191-102104154	s202	Ctrls	OK	66.5548	7.26469	-3.19557	-4.83955	5e-05	0.000800523
XLOC_043829	XLOC_043829	SULF1	chr8:70378858-70573150	s202	Ctrls	OK	140.967	15.4134	-3.1931	-3.40971	0.0001	0.00146536
XLOC_052598	XLOC_052598	CYorf15A.1,CYorf15B.1	chrY:21729234-21768160	s202	Ctrls	OK	33.6602	3.68444	-3.19153	-4.48353	5e-05	0.000800523
XLOC_013476	XLOC_013476	TGDS	chr13:95226307-95248511	s202	Ctrls	OK	16.2531	1.78376	-3.18773	-3.75814	0.0005	0.00529702
XLOC_034992	XLOC_034992	MAD2L1	chr4:120980576-121337921	s202	Ctrls	OK	21.9983	2.42713	-3.18007	-3.88281	0.00115	0.0100961
XLOC_037286	XLOC_037286	CTD-2015H6.3.1	chr5:79778111-79838382	s202	Ctrls	OK	32.9696	3.6819	-3.16261	-3.93668	0.00385	0.025142
XLOC_015055	XLOC_015055	SIX4	chr14:61176245-61191066	s202	Ctrls	OK	3.58051	0.400258	-3.16116	-3.52501	0.00115	0.0100961
XLOC_040815	XLOC_040815	GPNMB	chr7:23275585-23314727	s202	Ctrls	OK	68.9246	7.71359	-3.15954	-3.82018	5e-05	0.000800523
XLOC_038263	XLOC_038263	BTN3A3	chr6:26440699-26453643	s202	Ctrls	OK	37.3385	4.1815	-3.15857	-3.37668	5e-05	0.000800523
XLOC_037021	XLOC_037021	SEPP1	chr5:42756902-42887494	s202	Ctrls	OK	140.209	15.7355	-3.15548	-4.27367	5e-05	0.000800523
XLOC_007648	XLOC_007648	CD6	chr11:60739114-60787849	s202	Ctrls	OK	6.43142	0.72875	-3.14164	-1.80662	0.00025	0.00306111
XLOC_022992	XLOC_022992	RFX2	chr19:5993174-6110664	s202	Ctrls	OK	17.176	1.94999	-3.13886	-4.2872	5e-05	0.000800523
XLOC_043420	XLOC_043420	NAT1	chr8:18027985-18081198	s202	Ctrls	OK	2.80471	0.31892	-3.13659	-1.14728	0.00505	0.0306624
XLOC_024088	XLOC_024088	MSH2	chr2:47630107-47798078	s202	Ctrls	OK	127.457	14.4943	-3.13645	-3.05478	0.00045	0.00488975
XLOC_013480	XLOC_013480	SOX21	chr13:95361885-95364389	s202	Ctrls	OK	41.4751	4.72649	-3.1334	-5.28877	5e-05	0.000800523
XLOC_044903	XLOC_044903	MYBL1	chr8:67474413-67526482	s202	Ctrls	OK	6.25737	0.713217	-3.13314	-2.23054	0.00195	0.0149656
XLOC_016457	XLOC_016457	ISG20	chr15:89179383-89199714	s202	Ctrls	OK	24.0731	2.74719	-3.13139	-2.57595	0.00105	0.00941355
XLOC_025787	XLOC_025787	ASXL2	chr2:25960556-26101385	s202	Ctrls	OK	22.3141	2.5482	-3.13041	-4.8781	5e-05	0.000800523
XLOC_016464	XLOC_016464	FANCI	chr15:89787179-89878092	s202	Ctrls	OK	22.6212	2.58819	-3.12766	-1.30254	0.00585	0.0342542
XLOC_025289	XLOC_025289	ZDBF2	chr2:207139386-207179148	s202	Ctrls	OK	31.8162	3.64297	-3.12658	-5.46963	5e-05	0.000800523
XLOC_021821	XLOC_021821	PSTPIP2	chr18:43563501-43652238	s202	Ctrls	OK	24.7034	2.83536	-3.12311	-3.42993	0.0002	0.00256581
XLOC_006101	XLOC_006101	ST8SIA6	chr10:17360381-17496386	s202	Ctrls	OK	9.93034	1.14236	-3.11982	-2.95349	0.00385	0.025142
XLOC_040522	XLOC_040522	FBXO5	chr6:153291663-153304714	s202	Ctrls	OK	16.5217	1.90719	-3.11484	-4.23614	0.0002	0.00256581
XLOC_003855	XLOC_003855	ANP32E	chr1:150190716-150208504	s202	Ctrls	OK	65.5609	7.61057	-3.10676	-4.58165	5e-05	0.000800523
XLOC_012909	XLOC_012909	GPC6	chr13:93879094-95055812	s202	Ctrls	OK	11.8092	1.37258	-3.10495	-3.92839	0.00095	0.00872149
XLOC_012238	XLOC_012238	TRPV4	chr12:110220889-110271212	s202	Ctrls	OK	2.68146	0.311786	-3.10439	-1.75567	0.0006	0.00610906
XLOC_005136	XLOC_005136	MAP3K8	chr10:30722865-30750762	s202	Ctrls	OK	72.7525	8.46811	-3.10289	-3.94657	5e-05	0.000800523
XLOC_016892	XLOC_016892	PATL2	chr15:44957929-45003514	s202	Ctrls	OK	8.29318	0.965853	-3.10205	-2.64591	0.0011	0.00977368
XLOC_018154	XLOC_018154	NLRC5	chr16:57023396-57117443	s202	Ctrls	OK	57.2121	6.66653	-3.10131	-2.39065	0.0001	0.00146536
XLOC_003340	XLOC_003340	LRRIQ3	chr1:74491698-74663871	s202	Ctrls	OK	1.99811	0.234066	-3.09365	-0.743587	0.006	0.034937
XLOC_002116	XLOC_002116	TRAF3IP3	chr1:209929376-209957904	s202	Ctrls	OK	15.236	1.78986	-3.08956	-1.81524	0.0019	0.0147067
XLOC_018462	XLOC_018462	CDT1	chr16:88869620-88875666	s202	Ctrls	OK	7.07813	0.834179	-3.08494	-1.8908	0.0052	0.0313529
XLOC_027801	XLOC_027801	LPIN3	chr20:39969559-39995467	s202	Ctrls	OK	12.236	1.44283	-3.08416	-2.54424	0.0039	0.0253436
XLOC_051926	XLOC_051926	MAGT1	chrX:77081860-77151090	s202	Ctrls	OK	38.3705	4.53507	-3.0808	-4.65909	5e-05	0.000800523
XLOC_019534	XLOC_019534	ZMYND15	chr17:4643318-4649411	s202	Ctrls	OK	4.88509	0.577833	-3.07966	-3.18391	0.00575	0.0338781
XLOC_051457	XLOC_051457	ASB9	chrX:15252899-15288589	s202	Ctrls	OK	2.18694	0.259126	-3.07719	-0.924007	0.0065	0.0371309
XLOC_051141	XLOC_051141	MST4.1	chrX:131157292-131209971	s202	Ctrls	OK	2.44424	0.289884	-3.07584	-2.54716	0.00675	0.0381969
XLOC_033299	XLOC_033299	RHOH	chr4:40192672-40246281	s202	Ctrls	OK	5.56636	0.661455	-3.07302	-1.17204	0.00055	0.00572905
XLOC_010808	XLOC_010808	NEDD1	chr12:97301000-97347129	s202	Ctrls	OK	15.6515	1.86595	-3.06832	-2.4671	0.00025	0.00306111
XLOC_012527	XLOC_012527	NUS1P2	chr13:23489789-23490662	s202	Ctrls	OK	42.7411	5.09658	-3.06802	-4.82519	0.0018	0.0141418
XLOC_032533	XLOC_032533	DZIP1L	chr3:137780831-137834660	s202	Ctrls	OK	7.39938	0.883285	-3.06645	-1.94803	0.00065	0.00642408
XLOC_005366	XLOC_005366	REEP3	chr10:65281122-65384883	s202	Ctrls	OK	28.6637	3.43565	-3.06057	-5.30913	5e-05	0.000800523
XLOC_005608	XLOC_005608	KIF20B	chr10:91461366-91534700	s202	Ctrls	OK	4.20287	0.505819	-3.05468	-2.69681	0.0023	0.017021
XLOC_013874	XLOC_013874	NFATC4	chr14:24834878-24848810	s202	Ctrls	OK	90.1706	10.8674	-3.05265	-3.22792	5e-05	0.000800523
XLOC_037318	XLOC_037318	HAPLN1	chr5:82933623-83017432	s202	Ctrls	OK	80.6085	9.73055	-3.05034	-2.82932	0.0005	0.00529702
XLOC_034149	XLOC_034149	WWC2	chr4:184020445-184241930	s202	Ctrls	OK	68.0857	8.25147	-3.04463	-3.69027	5e-05	0.000800523
XLOC_004013	XLOC_004013	IQGAP3	chr1:156495196-156542396	s202	Ctrls	OK	5.38626	0.653076	-3.04396	-2.28175	0.00115	0.0100961
XLOC_007588	XLOC_007588	SERPING1	chr11:57364859-57382326	s202	Ctrls	OK	214.641	26.0338	-3.04347	-4.82071	5e-05	0.000800523
XLOC_020001	XLOC_020001	IFI35	chr17:41158741-41166473	s202	Ctrls	OK	45.7052	5.54366	-3.04345	-3.09448	0.00085	0.00795026
XLOC_017216	XLOC_017216	ANP32BP1	chr15:75613737-75615034	s202	Ctrls	OK	20.9798	2.54601	-3.04269	-4.26125	0.0013	0.0110709
XLOC_025383	XLOC_025383	PLCD4	chr2:219472487-219501907	s202	Ctrls	OK	32.551	3.96729	-3.03648	-4.20393	5e-05	0.000800523
XLOC_014999	XLOC_014999	BMP4	chr14:54416453-54425479	s202	Ctrls	OK	8.84151	1.07788	-3.0361	-2.46825	0.00185	0.014432		BMP4
XLOC_045143	XLOC_045143	STK3	chr8:99413630-99955055	s202	Ctrls	OK	20.4152	2.49484	-3.03263	-1.98047	0.00075	0.00720819
XLOC_023490	XLOC_023490	SIX5	chr19:46268042-46272311	s202	Ctrls	OK	21.5812	2.64069	-3.03079	-3.42072	0.0011	0.00977368
XLOC_025468	XLOC_025468	SP140,SP140L	chr2:230990025-231268447	s202	Ctrls	OK	20.3984	2.50103	-3.02786	-1.6347	0.00285	0.0201537
XLOC_032334	XLOC_032334	SPICE1	chr3:113161564-113234034	s202	Ctrls	OK	16.2953	2.00058	-3.02597	-3.00655	0.0001	0.00146536
XLOC_033732	XLOC_033732	OSTC	chr4:109571739-109588976	s202	Ctrls	OK	156.056	19.3465	-3.01191	-5.05254	5e-05	0.000800523
XLOC_038894	XLOC_038894	UFL1	chr6:96806249-97003152	s202	Ctrls	OK	39.2134	4.87887	-3.00673	-4.88015	5e-05	0.000800523
XLOC_011262	XLOC_011262	CD163,CD163L1	chr12:7499280-7656489	s202	Ctrls	OK	120.67	15.028	-3.00535	-2.15929	0.00105	0.00941355
XLOC_021662	XLOC_021662	ENOSF1	chr18:596997-712676	s202	Ctrls	OK	33.2924	4.14859	-3.0045	-2.86737	0.00465	0.0288054
XLOC_032538	XLOC_032538	CEP70	chr3:138213185-138313380	s202	Ctrls	OK	57.7093	7.19746	-3.00325	-4.22114	5e-05	0.000800523
XLOC_019972	XLOC_019972	FKBP10	chr17:39968961-39979465	s202	Ctrls	OK	136.793	17.0933	-3.00049	-4.24829	5e-05	0.000800523
XLOC_022920	XLOC_022920	ATP8B3	chr19:1782073-1812275	s202	Ctrls	OK	5.56893	0.695901	-3.00045	-2.94775	0.0012	0.0104065
XLOC_013075	XLOC_013075	LATS2	chr13:21547170-21635718	s202	Ctrls	OK	9.6163	1.20443	-2.99713	-3.142	0.00035	0.00400446
XLOC_022370	XLOC_022370	LSR	chr19:35739558-35758865	s202	Ctrls	OK	20.6821	2.59191	-2.9963	-3.59014	5e-05	0.000800523
XLOC_015071	XLOC_015071	KCNH5	chr14:63173286-63568755	s202	Ctrls	OK	11.8101	1.48099	-2.99539	-3.8906	0.0009	0.00832395
XLOC_010956	XLOC_010956	OAS2	chr12:113344581-113455556	s202	Ctrls	OK	34.0033	4.26867	-2.99382	-2.21025	0.0092	0.048423
XLOC_026386	XLOC_026386	NEURL3	chr2:97163382-97173846	s202	Ctrls	OK	4.59338	0.577346	-2.99205	-1.98308	0.0083	0.0447763
XLOC_033912	XLOC_033912	IL15	chr4:142557751-142655140	s202	Ctrls	OK	5.91606	0.743769	-2.99171	-2.01725	0.00705	0.0395903
XLOC_027019	XLOC_027019	SLC40A1	chr2:190425304-190448484	s202	Ctrls	OK	38.2841	4.81483	-2.99119	-3.66736	5e-05	0.000800523
XLOC_037291	XLOC_037291	DHFR	chr5:79922046-80172631	s202	Ctrls	OK	16.6325	2.09533	-2.98875	-2.90947	0.0017	0.0135543
XLOC_045294	XLOC_045294	HAS2	chr8:122624355-122656933	s202	Ctrls	OK	5.93972	0.748534	-2.98825	-3.25296	0.00085	0.00795026
XLOC_039029	XLOC_039029	FAM26E	chr6:116813459-116880031	s202	Ctrls	OK	1.24537	0.156947	-2.98823	-3.66459	0.0036	0.024103
XLOC_031339	XLOC_031339	SMC4	chr3:159943422-160203561	s202	Ctrls	OK	32.6522	4.12084	-2.98617	-1.40907	0.00385	0.025142
XLOC_038260	XLOC_038260	BTN2A2	chr6:26383323-26395102	s202	Ctrls	OK	26.2971	3.32347	-2.98414	-3.9584	5e-05	0.000800523
XLOC_038244	XLOC_038244	HIST1H2AC	chr6:26124372-26139336	s202	Ctrls	OK	106.694	13.4887	-2.98365	-4.60421	5e-05	0.000800523
XLOC_030762	XLOC_030762	GXYLT2,PPP4R2	chr3:72937223-73118350	s202	Ctrls	OK	73.2862	9.26788	-2.98323	-3.60954	0.0003	0.00353406
XLOC_011237	XLOC_011237	SCNN1A	chr12:6456008-6500733	s202	Ctrls	OK	1.61113	0.203965	-2.98168	-0.305876	0.00345	0.0233901
XLOC_022190	XLOC_022190	CD97	chr19:14492212-14519531	s202	Ctrls	OK	13.8519	1.75906	-2.97721	-3.94854	0.0004	0.00445852
XLOC_024358	XLOC_024358	GNLY	chr2:85912297-85925977	s202	Ctrls	OK	10.6933	1.35847	-2.97666	-2.56287	0.00055	0.00572905
XLOC_003429	XLOC_003429	GBP4	chr1:89646830-89664615	s202	Ctrls	OK	37.8286	4.80945	-2.97553	-2.38268	0.0029	0.0203841
XLOC_007335	XLOC_007335	RCN1	chr11:31806339-32127301	s202	Ctrls	OK	104.219	13.3132	-2.96869	-3.21367	0.00065	0.00642408
XLOC_044572	XLOC_044572	TNFRSF10A	chr8:23046791-23088439	s202	Ctrls	OK	6.89223	0.880618	-2.96838	-2.10642	0.00785	0.0430851
XLOC_038104	XLOC_038104	RREB1	chr6:7107829-7252213	s202	Ctrls	OK	10.3295	1.32275	-2.96516	-2.9996	5e-05	0.000800523
XLOC_030444	XLOC_030444	TRIM71	chr3:32859509-32933771	s202	Ctrls	OK	3.68656	0.474888	-2.95662	-3.52304	0.0076	0.0420729
XLOC_035077	XLOC_035077	PCDH18	chr4:138440071-138453648	s202	Ctrls	OK	29.8206	3.84414	-2.95558	-3.78412	0.00035	0.00400446
XLOC_019070	XLOC_019070	ZNF423	chr16:49521434-49891830	s202	Ctrls	OK	38.0919	4.9269	-2.95073	-4.49018	5e-05	0.000800523
XLOC_014042	XLOC_014042	TMX1	chr14:51706879-51722759	s202	Ctrls	OK	41.8488	5.41324	-2.95062	-4.20003	5e-05	0.000800523
XLOC_006992	XLOC_006992	PKP3	chr11:392613-404908	s202	Ctrls	OK	1.83707	0.238723	-2.944	-0.533128	0.00595	0.0346865
XLOC_023298	XLOC_023298	DMKN	chr19:35988121-36004560	s202	Ctrls	OK	8.53982	1.11325	-2.93943	-0.869005	5e-05	0.000800523
XLOC_018174	XLOC_018174	MMP15	chr16:58059469-58080805	s202	Ctrls	OK	70.1495	9.14917	-2.93872	-3.52914	5e-05	0.000800523
XLOC_032788	XLOC_032788	TNFSF10	chr3:172223297-172241297	s202	Ctrls	OK	13.619	1.77757	-2.93764	-2.9542	0.00095	0.00872149
XLOC_041384	XLOC_041384	ACN9	chr7:96745901-96811075	s202	Ctrls	OK	39.113	5.11666	-2.93437	-3.76158	0.0009	0.00832395
XLOC_027010	XLOC_027010	CALCRL	chr2:187866602-188430487	s202	Ctrls	OK	13.5506	1.7733	-2.93385	-1.93769	0.00765	0.0422909
XLOC_042292	XLOC_042292	GLI3	chr7:42000547-42277469	s202	Ctrls	OK	19.5336	2.56309	-2.93	-3.04924	0.00025	0.00306111
XLOC_033295	XLOC_033295	N4BP2	chr4:40044536-40159872	s202	Ctrls	OK	13.0238	1.7128	-2.92672	-4.67854	5e-05	0.000800523
XLOC_017051	XLOC_017051	ANXA2	chr15:60639332-60695082	s202	Ctrls	OK	110.71	14.6014	-2.9226	-4.08655	5e-05	0.000800523
XLOC_000929	XLOC_000929	NEXN	chr1:78347032-78409580	s202	Ctrls	OK	5.44019	0.717658	-2.92229	-2.50087	0.00255	0.0184657
XLOC_015836	XLOC_015836	ARHGAP11B	chr15:30909200-31060329	s202	Ctrls	OK	8.57082	1.13489	-2.91688	-2.16579	0.00685	0.0386967
XLOC_045786	XLOC_045786	ALDH1B1	chr9:38392660-38398658	s202	Ctrls	OK	29.4439	3.91817	-2.90971	-4.38479	5e-05	0.000800523
XLOC_013396	XLOC_013396	MZT1	chr13:73282494-73301825	s202	Ctrls	OK	31.996	4.25868	-2.90941	-4.81764	0.0002	0.00256581
XLOC_044002	XLOC_044002	SDC2	chr8:97505578-97624000	s202	Ctrls	OK	116.862	15.5588	-2.909	-3.83761	5e-05	0.000800523
XLOC_007961	XLOC_007961	TSKU	chr11:76493294-76509198	s202	Ctrls	OK	64.5668	8.59762	-2.90878	-3.87851	0.0002	0.00256581
XLOC_028098	XLOC_028098	SIGLEC1	chr20:3667616-3687775	s202	Ctrls	OK	9.04178	1.20419	-2.90854	-4.08272	0.0003	0.00353406
XLOC_007845	XLOC_007845	CCND1	chr11:69455854-69490184	s202	Ctrls	OK	59.1916	7.8856	-2.9081	-2.55502	0.0028	0.0198425
XLOC_002038	XLOC_002038	BTG2	chr1:203274618-203278730	s202	Ctrls	OK	129.911	17.3511	-2.90442	-4.98751	5e-05	0.000800523
XLOC_027054	XLOC_027054	STK17B	chr2:196998289-197041227	s202	Ctrls	OK	8.8609	1.18418	-2.90356	-3.57372	0.0002	0.00256581
XLOC_038646	XLOC_038646	CD2AP	chr6:47445524-47594999	s202	Ctrls	OK	18.1827	2.43223	-2.90222	-3.69143	0.0002	0.00256581
XLOC_029226	XLOC_029226	CDC45	chr22:19466981-19508135	s202	Ctrls	OK	7.56245	1.0141	-2.89865	-2.40499	0.00135	0.0113749
XLOC_016004	XLOC_016004	B2M	chr15:45003674-45011075	s202	Ctrls	OK	4850.22	650.509	-2.89841	-5.06689	0.0005	0.00529702
XLOC_002121	XLOC_002121	HHAT	chr1:210501595-210849638	s202	Ctrls	OK	6.01185	0.807122	-2.89695	-2.77034	0.00015	0.00202358
XLOC_007346	XLOC_007346	DEPDC7	chr11:33037409-33055128	s202	Ctrls	OK	4.44315	0.596523	-2.89693	-2.72142	0.00535	0.0320726
XLOC_028571	XLOC_028571	AURKA	chr20:54944444-54967393	s202	Ctrls	OK	6.60226	0.887343	-2.8954	-2.15676	0.00075	0.00720819
XLOC_033041	XLOC_033041	TACC3	chr4:1723226-1746898	s202	Ctrls	OK	21.7054	2.91853	-2.89474	-2.74665	0.00035	0.00400446
XLOC_021964	XLOC_021964	CNN2	chr19:1026579-1039063	s202	Ctrls	OK	38.8789	5.24479	-2.89003	-3.95008	5e-05	0.000800523
XLOC_018590	XLOC_018590	PRSS30P	chr16:2889568-2892745	s202	Ctrls	OK	3.03143	0.409837	-2.88687	-1.63899	0.0092	0.048423
XLOC_009621	XLOC_009621	KDELC2	chr11:108342831-108369159	s202	Ctrls	OK	18.4582	2.5025	-2.88282	-3.98939	5e-05	0.000800523
XLOC_031036	XLOC_031036	PARP14	chr3:122399464-122449687	s202	Ctrls	OK	61.3862	8.32812	-2.88185	-4.69938	5e-05	0.000800523
XLOC_000338	XLOC_000338	PNRC2	chr1:24285598-24289952	s202	Ctrls	OK	13.3559	1.81462	-2.87974	-2.97446	0.0008	0.00758608
XLOC_001892	XLOC_001892	LAMC1	chr1:182992596-183114727	s202	Ctrls	OK	68.5339	9.31802	-2.87872	-4.5565	5e-05	0.000800523
XLOC_032357	XLOC_032357	IGSF11	chr3:118619403-118864915	s202	Ctrls	OK	69.8651	9.56474	-2.86878	-4.97267	5e-05	0.000800523
XLOC_034059	XLOC_034059	C4orf43	chr4:164415593-164441691	s202	Ctrls	OK	23.7233	3.25223	-2.8668	-3.68681	0.0003	0.00353406
XLOC_027874	XLOC_027874	EYA2	chr20:45523262-45817492	s202	Ctrls	OK	31.7085	4.3481	-2.86642	-3.26982	5e-05	0.000800523
XLOC_030992	XLOC_030992	ARHGAP31	chr3:119013219-119139561	s202	Ctrls	OK	17.1853	2.3598	-2.86443	-3.21393	0.0004	0.00445852
XLOC_042475	XLOC_042475	ZNF680	chr7:63980261-64023484	s202	Ctrls	OK	28.2528	3.88195	-2.86354	-4.44731	5e-05	0.000800523
XLOC_051034	XLOC_051034	PLS3	chrX:114795500-114885181	s202	Ctrls	OK	260.059	35.7826	-2.86151	-4.02031	5e-05	0.000800523
XLOC_024868	XLOC_024868	KYNU	chr2:143635066-143799890	s202	Ctrls	OK	2.6312	0.362041	-2.8615	-1.51246	0.00805	0.0438079
XLOC_022042	XLOC_022042	ACSBG2	chr19:6135709-6193112	s202	Ctrls	OK	4.25723	0.587128	-2.85817	-3.24422	0.00565	0.0334874
XLOC_039411	XLOC_039411	F13A1	chr6:6144317-6321246	s202	Ctrls	OK	20.5853	2.84403	-2.8556	-3.24974	0.00025	0.00306111
XLOC_004016	XLOC_004016	NES	chr1:156638554-156647189	s202	Ctrls	OK	108.183	14.995	-2.85091	-3.68081	5e-05	0.000800523
XLOC_009257	XLOC_009257	FAM86C2P	chr11:67552732-67572807	s202	Ctrls	OK	6.28532	0.871821	-2.84988	-2.36235	0.0058	0.0340919
XLOC_017495	XLOC_017495	RP11-89K11.1.1	chr15:102277297-102285913	s202	Ctrls	OK	10.6478	1.48836	-2.83876	-3.11171	0.00865	0.0461883
XLOC_006165	XLOC_006165	ARMC4	chr10:28064114-28287977	s202	Ctrls	OK	2.02906	0.284136	-2.83616	-0.954937	0.00935	0.0490179
XLOC_003448	XLOC_003448	TGFBR3	chr1:92145901-92371892	s202	Ctrls	OK	14.1871	1.99979	-2.82666	-3.47612	5e-05	0.000800523		TGFBR3
XLOC_026967	XLOC_026967	CCDC141,TTN	chr2:179387553-179914813	s202	Ctrls	OK	8.87983	1.25257	-2.82564	-1.10087	0.00385	0.025142
XLOC_027860	XLOC_027860	UBE2C	chr20:44441214-44445596	s202	Ctrls	OK	30.2137	4.2655	-2.82442	-3.1059	0.0014	0.0116579
XLOC_010890	XLOC_010890	BTBD11	chr12:107712189-108053419	s202	Ctrls	OK	30.3818	4.29722	-2.82173	-3.37701	0.00015	0.00202358
XLOC_025143	XLOC_025143	MFSD6	chr2:191273080-191399448	s202	Ctrls	OK	90.7861	12.8662	-2.81889	-3.65488	5e-05	0.000800523
XLOC_030212	XLOC_030212	CELSR1	chr22:46756730-46933067	s202	Ctrls	OK	22.2255	3.15021	-2.8187	-3.33068	5e-05	0.000800523
XLOC_014930	XLOC_014930	MIS18BP1	chr14:45672392-45722743	s202	Ctrls	OK	13.676	1.94071	-2.817	-2.69264	0.00255	0.0184657
XLOC_020162	XLOC_020162	MSI2	chr17:55333211-55757658	s202	Ctrls	OK	139.218	19.7825	-2.81505	-4.61839	5e-05	0.000800523
XLOC_009273	XLOC_009273	MTL5	chr11:68474907-68519032	s202	Ctrls	OK	3.49015	0.496464	-2.81353	-1.25194	0.0088	0.0467258
XLOC_037473	XLOC_037473	AC010468.1.1	chr5:110527923-110528740	s202	Ctrls	OK	36.3197	5.18303	-2.80888	-4.28351	0.00165	0.0132513
XLOC_019560	XLOC_019560	XAF1	chr17:6659155-6678962	s202	Ctrls	OK	46.4316	6.63715	-2.80647	-4.2977	5e-05	0.000800523
XLOC_011296	XLOC_011296	MFAP5	chr12:8786962-8815484	s202	Ctrls	OK	1.32014	0.188838	-2.80547	-0.373876	0.00575	0.0338781
XLOC_005715	XLOC_005715	KAZALD1	chr10:102820998-102827888	s202	Ctrls	OK	8.98017	1.28602	-2.80383	-2.4793	0.003	0.0209389
XLOC_044593	XLOC_044593	KCTD9	chr8:25285365-25315992	s202	Ctrls	OK	11.1342	1.60205	-2.79701	-2.20083	0.0005	0.00529702
XLOC_006803	XLOC_006803	ITPRIP	chr10:106071893-106098162	s202	Ctrls	OK	23.4967	3.38632	-2.79467	-4.00233	0.0001	0.00146536
XLOC_035308	XLOC_035308	HMGB2	chr4:174252845-174256276	s202	Ctrls	OK	103.51	14.9273	-2.79374	-4.13566	0.0001	0.00146536
XLOC_008920	XLOC_008920	AGBL2	chr11:47681142-47736941	s202	Ctrls	OK	7.2428	1.04636	-2.79117	-1.40567	0.00665	0.0378247
XLOC_040562	XLOC_040562	EZR	chr6:159186772-159241625	s202	Ctrls	OK	280.416	40.5302	-2.7905	-4.28651	5e-05	0.000800523
XLOC_025145	XLOC_025145	NAB1	chr2:191511471-191573442	s202	Ctrls	OK	77.4974	11.2052	-2.78998	-3.78426	0.00045	0.00488975
XLOC_035164	XLOC_035164	LRBA	chr4:151185593-151936879	s202	Ctrls	OK	27.593	3.99228	-2.78902	-3.50741	5e-05	0.000800523
XLOC_037118	XLOC_037118	DEPDC1B	chr5:59892738-59996017	s202	Ctrls	OK	7.31881	1.06015	-2.78734	-2.72461	0.0024	0.0175779
XLOC_003714	XLOC_003714	NOTCH2	chr1:120454175-120612240	s202	Ctrls	OK	91.6518	13.3392	-2.78049	-3.25607	0.0008	0.00758608
XLOC_021408	XLOC_021408	TGIF1	chr18:3411605-3459976	s202	Ctrls	OK	73.0796	10.6966	-2.77232	-3.76535	5e-05	0.000800523
XLOC_000065	XLOC_000065	TNFRSF14	chr1:2481358-2497061	s202	Ctrls	OK	40.9762	6.02453	-2.76587	-3.15647	5e-05	0.000800523
XLOC_028842	XLOC_028842	SIM2	chr21:38071072-38362536	s202	Ctrls	OK	18.6866	2.74782	-2.76564	-2.35002	0.0064	0.0366967
XLOC_033187	XLOC_033187	LAP3	chr4:17578814-17616194	s202	Ctrls	OK	174.678	25.7203	-2.76372	-4.57565	5e-05	0.000800523
XLOC_034774	XLOC_034774	HPSE	chr4:84213613-84256306	s202	Ctrls	OK	1.8477	0.272065	-2.76371	-1.47751	0.00385	0.025142
XLOC_013000	XLOC_013000	SOX1	chr13:112721912-112726020	s202	Ctrls	OK	46.1314	6.79355	-2.76351	-4.91946	5e-05	0.000800523
XLOC_020580	XLOC_020580	TMEM220	chr17:10616611-10633646	s202	Ctrls	OK	8.95954	1.32095	-2.76185	-3.71566	0.0018	0.0141418
XLOC_043006	XLOC_043006	PODXL	chr7:131185020-131242976	s202	Ctrls	OK	171.597	25.3045	-2.76156	-3.84631	0.00015	0.00202358
XLOC_051816	XLOC_051816	RP6-159A1.2.1	chrX:65176130-65177038	s202	Ctrls	OK	17.8987	2.64304	-2.75958	-3.94009	0.0064	0.0366967
XLOC_047472	XLOC_047472	STOM	chr9:124101354-124132531	s202	Ctrls	OK	121.389	17.9883	-2.7545	-4.22651	5e-05	0.000800523
XLOC_036813	XLOC_036813	CMBL	chr5:10275986-10308138	s202	Ctrls	OK	60.9522	9.05873	-2.7503	-3.75686	0.00015	0.00202358
XLOC_000509	XLOC_000509	RP11-181E22.1.1	chr1:35587622-35588085	s202	Ctrls	OK	23.4269	3.48408	-2.74931	-4.58292	0.0087	0.0463309
XLOC_012916	XLOC_012916	DNAJC3	chr13:96329410-96443301	s202	Ctrls	OK	16.3927	2.44078	-2.74764	-3.55662	0.0015	0.0122848
XLOC_038169	XLOC_038169	GMPR	chr6:16238810-16295780	s202	Ctrls	OK	17.2453	2.56997	-2.74638	-2.96946	0.00285	0.0201537
XLOC_041006	XLOC_041006	IKZF1	chr7:50343719-50472799	s202	Ctrls	OK	5.31013	0.793404	-2.74262	-1.64623	0.0005	0.00529702
XLOC_022327	XLOC_022327	ZNF536	chr19:30863327-31048965	s202	Ctrls	OK	14.2398	2.13293	-2.73901	-4.34819	0.0001	0.00146536
XLOC_025737	XLOC_025737	SDC1	chr2:20400557-20425194	s202	Ctrls	OK	22.1811	3.32504	-2.73789	-3.55324	5e-05	0.000800523
XLOC_021475	XLOC_021475	RBBP8	chr18:20513289-20606449	s202	Ctrls	OK	14.5786	2.18648	-2.73717	-3.82584	0.0002	0.00256581
XLOC_047279	XLOC_047279	CTSL2	chr9:99794939-99801925	s202	Ctrls	OK	17.4218	2.61791	-2.7344	-3.30878	0.00165	0.0132513
XLOC_020287	XLOC_020287	GPRC5C	chr17:72427051-72446719	s202	Ctrls	OK	30.505	4.58582	-2.73379	-3.57837	0.0005	0.00529702
XLOC_039374	XLOC_039374	SERPINB1	chr6:2832565-2842240	s202	Ctrls	OK	26.5438	3.99515	-2.73205	-3.26763	0.0003	0.00353406
XLOC_043500	XLOC_043500	EPHX2	chr8:27348295-27403081	s202	Ctrls	OK	29.6145	4.46746	-2.72878	-3.20142	0.00015	0.00202358
XLOC_037079	XLOC_037079	PPAP2A	chr5:54603587-54830878	s202	Ctrls	OK	203.786	30.7651	-2.72768	-2.97265	0.0023	0.017021
XLOC_052600	XLOC_052600	EIF1AY	chrY:22737610-22755040	s202	Ctrls	OK	38.3678	5.79768	-2.72635	-3.19036	0.00135	0.0113749
XLOC_020985	XLOC_020985	ETV4	chr17:41605211-41623762	s202	Ctrls	OK	20.5355	3.10434	-2.72576	-3.6958	0.0005	0.00529702
XLOC_045638	XLOC_045638	MTAP	chr9:21802634-22121096	s202	Ctrls	OK	13.0609	1.97946	-2.72208	-2.73861	0.0002	0.00256581
XLOC_012003	XLOC_012003	E2F7	chr12:77415026-77459360	s202	Ctrls	OK	4.37013	0.662852	-2.72092	-2.31061	0.0046	0.0286474
XLOC_000159	XLOC_000159	AGTRAP	chr1:11796140-11814859	s202	Ctrls	OK	71.7034	10.9651	-2.70912	-3.97314	0.0001	0.00146536
XLOC_030830	XLOC_030830	ARL13B	chr3:93698982-93847389	s202	Ctrls	OK	9.43195	1.44744	-2.70405	-1.73557	0.00745	0.0414039
XLOC_021014	XLOC_021014	KIF18B	chr17:43003359-43025082	s202	Ctrls	OK	3.41524	0.52465	-2.70256	-2.78219	0.0041	0.0262741
XLOC_040748	XLOC_040748	TMEM106B	chr7:12250866-12276886	s202	Ctrls	OK	39.9997	6.1667	-2.69742	-3.21721	0.0011	0.00977368
XLOC_008940	XLOC_008940	FOLH1	chr11:49168186-49230222	s202	Ctrls	OK	8.98181	1.3878	-2.69421	-2.47612	0.005	0.0304052
XLOC_037512	XLOC_037512	SEMA6A	chr5:115779311-115927094	s202	Ctrls	OK	118.211	18.2862	-2.69254	-2.44058	0.00195	0.0149656
XLOC_007179	XLOC_007179	SWAP70	chr11:9685623-9774538	s202	Ctrls	OK	43.8721	6.78927	-2.69198	-4.46601	5e-05	0.000800523
XLOC_006404	XLOC_006404	ZWINT	chr10:58116988-58121036	s202	Ctrls	OK	22.5082	3.48427	-2.69153	-3.6091	0.0003	0.00353406
XLOC_050497	XLOC_050497	RP2	chrX:46696374-46741793	s202	Ctrls	OK	17.8308	2.76312	-2.69	-4.34356	0.00015	0.00202358
XLOC_039523	XLOC_039523	FAM65B,RP3-369A17.5.1	chr6:24797548-25057301	s202	Ctrls	OK	87.1691	13.5194	-2.68879	-3.31521	0.00025	0.00306111
XLOC_011339	XLOC_011339	CSDA	chr12:10851682-10875911	s202	Ctrls	OK	163.029	25.3135	-2.68715	-2.65166	0.0016	0.0129439
XLOC_028255	XLOC_028255	THBD	chr20:23026269-23030378	s202	Ctrls	OK	13.6011	2.12191	-2.68029	-3.74938	0.0005	0.00529702
XLOC_039850	XLOC_039850	CCND3	chr6:41902670-42018095	s202	Ctrls	OK	206.604	32.263	-2.67892	-3.62797	5e-05	0.000800523
XLOC_012213	XLOC_012213	CMKLR1	chr12:108681820-108733118	s202	Ctrls	OK	6.52714	1.02194	-2.67513	-2.09176	0.00295	0.0206552
XLOC_005393	XLOC_005393	RP11-119F7.5.1	chr10:70458256-70460551	s202	Ctrls	OK	14.6741	2.29869	-2.67439	-3.92288	0.00105	0.00941355
XLOC_020028	XLOC_020028	GRN	chr17:42422490-42430470	s202	Ctrls	OK	105.774	16.5726	-2.6741	-4.36535	5e-05	0.000800523
XLOC_023699	XLOC_023699	C19orf51	chr19:55670030-55678090	s202	Ctrls	OK	5.07082	0.794733	-2.67368	-1.32236	0.00025	0.00306111
XLOC_005862	XLOC_005862	GRK5	chr10:120967100-121215131	s202	Ctrls	OK	77.0015	12.0893	-2.67115	-3.43805	0.0001	0.00146536
XLOC_037606	XLOC_037606	IRF1	chr5:131817300-131826490	s202	Ctrls	OK	70.1176	11.0316	-2.66813	-3.44883	0.00015	0.00202358
XLOC_026961	XLOC_026961	TTC30A	chr2:178467816-178483694	s202	Ctrls	OK	5.94619	0.936242	-2.66701	-3.63263	0.00115	0.0100961
XLOC_001973	XLOC_001973	NEK7	chr1:198126092-198291550	s202	Ctrls	OK	25.024	3.94642	-2.6647	-3.18443	0.0006	0.00610906
XLOC_037500	XLOC_037500	TICAM2,TMED7,TMED7-TICAM2	chr5:114914338-114968689	s202	Ctrls	OK	93.0958	14.6953	-2.66336	-4.15295	5e-05	0.000800523
XLOC_050986	XLOC_050986	COL4A5	chrX:107683073-107940775	s202	Ctrls	OK	31.4005	4.9593	-2.66258	-2.98741	0.0003	0.00353406
XLOC_019859	XLOC_019859	SUZ12	chr17:30264055-30328064	s202	Ctrls	OK	37.0518	5.86229	-2.66001	-4.46841	5e-05	0.000800523
XLOC_003181	XLOC_003181	ORC1	chr1:52838500-52870131	s202	Ctrls	OK	3.07024	0.48608	-2.65909	-2.67808	0.0049	0.0299252
XLOC_020978	XLOC_020978	BRCA1	chr17:41196311-41322290	s202	Ctrls	OK	3.3889	0.536757	-2.65847	-1.07068	0.0006	0.00610906
XLOC_046403	XLOC_046403	PBX3	chr9:128509623-128729656	s202	Ctrls	OK	41.1991	6.54576	-2.65398	-3.83079	5e-05	0.000800523
XLOC_003713	XLOC_003713	RP5-1042I8.7.1	chr1:120451877-120453236	s202	Ctrls	OK	8.43607	1.34212	-2.65205	-3.37255	0.00705	0.0395903
XLOC_034110	XLOC_034110	GALNT7	chr4:174053078-174250845	s202	Ctrls	OK	44.4766	7.1023	-2.64669	-3.58525	0.00035	0.00400446
XLOC_036961	XLOC_036961	PRLR	chr5:35048860-35230794	s202	Ctrls	OK	3.29455	0.526099	-2.64667	-1.13717	0.0012	0.0104065
XLOC_037914	XLOC_037914	LCP2	chr5:169659450-169725231	s202	Ctrls	OK	35.4363	5.65995	-2.64637	-2.95404	0.0012	0.0104065
XLOC_009482	XLOC_009482	CTSC	chr11:88026772-88070955	s202	Ctrls	OK	86.7588	13.8621	-2.64587	-3.67388	5e-05	0.000800523
XLOC_014198	XLOC_014198	RAD51B	chr14:68286495-69196935	s202	Ctrls	OK	4.69052	0.75044	-2.64394	-0.899341	0.0014	0.0116579
XLOC_023162	XLOC_023162	RASAL3	chr19:15562437-15575382	s202	Ctrls	OK	6.60402	1.05677	-2.64369	-3.72003	0.0034	0.0231221
XLOC_006842	XLOC_006842	AFAP1L2	chr10:116054582-116164515	s202	Ctrls	OK	81.3597	13.0191	-2.64368	-4.09128	5e-05	0.000800523
XLOC_032091	XLOC_032091	DNASE1L3	chr3:58177983-58200853	s202	Ctrls	OK	2.40787	0.385769	-2.64195	-1.14529	0.00845	0.0453762
XLOC_012748	XLOC_012748	CKAP2	chr13:53029494-53050485	s202	Ctrls	OK	27.0414	4.33324	-2.64165	-4.06516	0.0001	0.00146536
XLOC_024205	XLOC_024205	ETAA1	chr2:67624450-67637677	s202	Ctrls	OK	11.8016	1.8933	-2.64001	-2.8753	0.0038	0.0249795
XLOC_039780	XLOC_039780	FKBP5	chr6:35541361-35696360	s202	Ctrls	OK	45.109	7.24483	-2.63839	-4.44247	5e-05	0.000800523
XLOC_039192	XLOC_039192	SAMD5	chr6:147830062-148275073	s202	Ctrls	OK	18.5915	2.98783	-2.63747	-3.13517	0.0004	0.00445852
XLOC_000320	XLOC_000320	C1QC	chr1:22970122-22974603	s202	Ctrls	OK	294.675	47.4433	-2.63484	-4.04245	5e-05	0.000800523
XLOC_033662	XLOC_033662	BMPR1B	chr4:95679118-96079599	s202	Ctrls	OK	15.451	2.49248	-2.63205	-3.35375	0.0002	0.00256581		BMPR1B
XLOC_013962	XLOC_013962	MIPOL1	chr14:37667117-38021566	s202	Ctrls	OK	6.52233	1.05549	-2.62748	-1.95326	0.0017	0.0135543
XLOC_022031	XLOC_022031	UHRF1	chr19:4909509-4962162	s202	Ctrls	OK	3.68158	0.596506	-2.62572	-2.61928	0.0019	0.0147067
XLOC_000319	XLOC_000319	C1QA	chr1:22962998-22966175	s202	Ctrls	OK	227.799	36.9563	-2.62387	-3.96967	5e-05	0.000800523
XLOC_040915	XLOC_040915	EEPD1	chr7:36192757-36341152	s202	Ctrls	OK	41.1054	6.67705	-2.62205	-2.36032	0.00475	0.0292426
XLOC_044810	XLOC_044810	TCEA1	chr8:54879111-54935089	s202	Ctrls	OK	92.0918	14.9668	-2.62131	-4.18178	5e-05	0.000800523
XLOC_043986	XLOC_043986	ESRP1	chr8:95653301-95719694	s202	Ctrls	OK	3.62609	0.591594	-2.61574	-1.79577	0.00295	0.0206552
XLOC_024217	XLOC_024217	ANTXR1	chr2:69240309-69476459	s202	Ctrls	OK	44.8885	7.33387	-2.6137	-3.83001	5e-05	0.000800523
XLOC_034278	XLOC_034278	AC226119.4.1,FAM86EP	chr4:3916909-3957148	s202	Ctrls	OK	4.55316	0.744145	-2.61321	-1.60248	0.005	0.0304052
XLOC_023636	XLOC_023636	ZNF611	chr19:53206065-53238307	s202	Ctrls	OK	22.6274	3.69963	-2.61262	-4.34884	5e-05	0.000800523
XLOC_009844	XLOC_009844	ETS1	chr11:128328655-128457437	s202	Ctrls	OK	35.5398	5.81949	-2.61047	-4.18153	5e-05	0.000800523
XLOC_001090	XLOC_001090	CDC14A	chr1:100810032-100985833	s202	Ctrls	OK	7.62227	1.24917	-2.60925	-2.48783	0.0023	0.017021
XLOC_039223	XLOC_039223	PLEKHG1	chr6:150920998-151164799	s202	Ctrls	OK	23.103	3.78622	-2.60925	-4.28117	5e-05	0.000800523
XLOC_021322	XLOC_021322	TK1	chr17:76170159-76183314	s202	Ctrls	OK	7.57661	1.24482	-2.60561	-2.72382	0.00675	0.0381969
XLOC_044453	XLOC_044453	RP11-981G7.4.1	chr8:10340387-10411676	s202	Ctrls	OK	35.63	5.85714	-2.60482	-3.7516	0.0036	0.024103
XLOC_024033	XLOC_024033	GALM	chr2:38893051-38968379	s202	Ctrls	OK	8.25055	1.35754	-2.60349	-2.65625	0.002	0.015302
XLOC_025153	XLOC_025153	OBFC2A	chr2:192542793-192553251	s202	Ctrls	OK	10.8603	1.78766	-2.60291	-2.54634	0.0027	0.0193197
XLOC_023817	XLOC_023817	GRHL1	chr2:10085340-10142411	s202	Ctrls	OK	14.1192	2.32685	-2.60121	-3.45739	0.00015	0.00202358
XLOC_001773	XLOC_001773	PRRX1	chr1:170631868-170708560	s202	Ctrls	OK	21.7416	3.58321	-2.60113	-2.42873	0.00055	0.00572905
XLOC_028198	XLOC_028198	RRBP1	chr20:17594322-17662940	s202	Ctrls	OK	45.4522	7.50548	-2.59833	-3.82636	0.0001	0.00146536
XLOC_034143	XLOC_034143	ODZ3	chr4:182795590-183724177	s202	Ctrls	OK	53.3691	8.82369	-2.59655	-3.65986	0.0001	0.00146536
XLOC_014400	XLOC_014400	PPP4R4	chr14:94612464-94746072	s202	Ctrls	OK	20.1914	3.34542	-2.59349	-1.91492	0.00595	0.0346865
XLOC_050515	XLOC_050515	WASF4P	chrX:47657324-47664188	s202	Ctrls	OK	8.04368	1.33366	-2.59246	-3.05336	0.00475	0.0292426
XLOC_025584	XLOC_025584	ANO7	chr2:242127923-242164792	s202	Ctrls	OK	8.92186	1.47953	-2.5922	-2.59593	0.0008	0.00758608
XLOC_023236	XLOC_023236	ZNF43	chr19:21990084-22034830	s202	Ctrls	OK	14.2464	2.36422	-2.59116	-3.89743	0.001	0.00907991
XLOC_040119	XLOC_040119	SNHG5,SNORD50A,SNORD50B	chr6:86386724-86388451	s202	Ctrls	OK	238.043	39.6049	-2.58747	-4.57959	0.0001	0.00146536
XLOC_038932	XLOC_038932	PRDM1	chr6:106534194-106557814	s202	Ctrls	OK	4.99802	0.834214	-2.58287	-1.90085	0.00295	0.0206552
XLOC_033418	XLOC_033418	REST	chr4:57774041-57813577	s202	Ctrls	OK	8.6211	1.43941	-2.58239	-3.26272	0.00015	0.00202358
XLOC_003671	XLOC_003671	CD58	chr1:116966345-117113661	s202	Ctrls	OK	16.9896	2.83671	-2.58236	-2.86052	0.00685	0.0386967
XLOC_046915	XLOC_046915	ZNF658	chr9:40760699-40836415	s202	Ctrls	OK	2.76427	0.462513	-2.57933	-2.76977	0.0055	0.0327448
XLOC_021489	XLOC_021489	IMPACT	chr18:22006579-22033499	s202	Ctrls	OK	24.8731	4.16346	-2.57873	-4.34574	5e-05	0.000800523
XLOC_011823	XLOC_011823	TIMELESS	chr12:56810902-56843187	s202	Ctrls	OK	14.7238	2.46694	-2.57736	-3.25118	0.00025	0.00306111
XLOC_026832	XLOC_026832	PLA2R1	chr2:160788518-160919121	s202	Ctrls	OK	2.70796	0.453786	-2.57712	-2.4796	0.0036	0.024103
XLOC_013530	XLOC_013530	ZIC5	chr13:100615274-100624163	s202	Ctrls	OK	17.1191	2.87207	-2.57545	-3.64422	0.00065	0.00642408
XLOC_043989	XLOC_043989	DPY19L4	chr8:95731930-95806064	s202	Ctrls	OK	19.8144	3.32452	-2.57533	-2.99882	0.00075	0.00720819
XLOC_016330	XLOC_016330	PSTPIP1	chr15:77285699-77329673	s202	Ctrls	OK	7.08814	1.19033	-2.57405	-1.42131	0.0009	0.00832395
XLOC_031457	XLOC_031457	SOX2	chr3:180701496-181508734	s202	Ctrls	OK	193.651	32.5624	-2.57218	-3.10002	0.0005	0.00529702
XLOC_031935	XLOC_031935	FYCO1	chr3:45959395-46037316	s202	Ctrls	OK	6.74646	1.1352	-2.57118	-2.65909	0.0012	0.0104065
XLOC_032358	XLOC_032358	B4GALT4	chr3:118930578-119009513	s202	Ctrls	OK	45.1842	7.62693	-2.56664	-3.31838	5e-05	0.000800523
XLOC_000962	XLOC_000962	SAMD13	chr1:84764048-84863514	s202	Ctrls	OK	7.06617	1.19322	-2.56607	-2.14793	0.00075	0.00720819
XLOC_040453	XLOC_040453	FUCA2	chr6:143816613-143832827	s202	Ctrls	OK	75.3865	12.7598	-2.5627	-4.1028	0.0002	0.00256581
XLOC_037235	XLOC_037235	COL4A3BP	chr5:74664310-74896969	s202	Ctrls	OK	69.9051	11.8342	-2.56244	-2.75482	0.0015	0.0122848
XLOC_007816	XLOC_007816	GSTP1	chr11:67351065-67354131	s202	Ctrls	OK	1027.08	173.983	-2.56153	-3.80268	5e-05	0.000800523
XLOC_010228	XLOC_010228	RP11-467L13.5.1	chr12:31907650-31908055	s202	Ctrls	OK	36.6045	6.20759	-2.55991	-2.93693	0.0083	0.0447763
XLOC_004077	XLOC_004077	IGSF9	chr1:159896828-159915394	s202	Ctrls	OK	76.2016	12.9336	-2.5587	-3.27429	0.0006	0.00610906
XLOC_039378	XLOC_039378	SERPINB6	chr6:2948392-2972399	s202	Ctrls	OK	181.841	30.9265	-2.55576	-3.80312	5e-05	0.000800523
XLOC_004525	XLOC_004525	SLC30A1	chr1:211744909-211752084	s202	Ctrls	OK	24.9906	4.2518	-2.55524	-4.2657	5e-05	0.000800523
XLOC_020158	XLOC_020158	SCPEP1	chr17:55055467-55084127	s202	Ctrls	OK	41.2465	7.02049	-2.55463	-4.13008	0.00025	0.00306111
XLOC_013676	XLOC_013676	RNASE6	chr14:21249209-21250626	s202	Ctrls	OK	22.4885	3.83048	-2.55359	-3.41854	0.0036	0.024103
XLOC_039024	XLOC_039024	NT5DC1	chr6:116421998-116566855	s202	Ctrls	OK	15.0792	2.56898	-2.55329	-2.68292	0.0027	0.0193197
XLOC_010285	XLOC_010285	IRAK4	chr12:44152746-44183346	s202	Ctrls	OK	11.597	1.97745	-2.55204	-2.87533	0.0003	0.00353406
XLOC_009358	XLOC_009358	CHRDL2	chr11:74407473-74442430	s202	Ctrls	OK	4.91594	0.838349	-2.55185	-2.08491	0.0017	0.0135543
XLOC_018677	XLOC_018677	SOCS1	chr16:11348261-11350036	s202	Ctrls	OK	11.6658	1.99048	-2.5511	-4.18972	0.00785	0.0430851
XLOC_028729	XLOC_028729	NCAM2	chr21:22370632-22915650	s202	Ctrls	OK	66.7044	11.4648	-2.54057	-2.75798	0.00095	0.00872149
XLOC_003899	XLOC_003899	S100A11	chr1:151967006-152020383	s202	Ctrls	OK	249.992	42.9854	-2.53996	-4.02087	5e-05	0.000800523
XLOC_006711	XLOC_006711	TM9SF3	chr10:98277865-98347209	s202	Ctrls	OK	124.035	21.3423	-2.53895	-3.63344	0.00035	0.00400446
XLOC_016933	XLOC_016933	FBN1	chr15:48700502-48938046	s202	Ctrls	OK	36.5882	6.30992	-2.53568	-2.56897	0.0024	0.0175779
XLOC_017081	XLOC_017081	CSNK1G1,KIAA0101	chr15:64457715-64679886	s202	Ctrls	OK	41.1756	7.10739	-2.5344	-3.64435	0.0001	0.00146536
XLOC_005124	XLOC_005124	BAMBI	chr10:28966270-28971868	s202	Ctrls	OK	40.4802	6.99678	-2.53246	-3.79322	0.0003	0.00353406		BAMBI
XLOC_000398	XLOC_000398	RP11-40H20.2.1	chr1:27533420-27534287	s202	Ctrls	OK	34.0411	5.89876	-2.52879	-4.06711	0.00305	0.0212506
XLOC_045606	XLOC_045606	CNTLN	chr9:17134979-17503921	s202	Ctrls	OK	8.32082	1.44914	-2.52153	-2.61571	0.00495	0.0301565
XLOC_029064	XLOC_029064	MIS18A	chr21:33640529-33653299	s202	Ctrls	OK	15.247	2.65769	-2.52028	-3.42706	0.00335	0.0228759
XLOC_007848	XLOC_007848	ANO1	chr11:69924407-70035634	s202	Ctrls	OK	5.65407	0.986691	-2.51862	-1.74025	0.00795	0.0435019
XLOC_006551	XLOC_006551	ZNF503	chr10:77029576-77168740	s202	Ctrls	OK	17.3267	3.02384	-2.51854	-2.09265	0.0061	0.0354053
XLOC_026960	XLOC_026960	TTC30B	chr2:178414889-178417742	s202	Ctrls	OK	6.43411	1.1271	-2.51313	-3.05689	0.0054	0.032275
XLOC_046690	XLOC_046690	FREM1	chr9:14734663-14910993	s202	Ctrls	OK	16.3802	2.86955	-2.51305	-2.16224	0.00355	0.023897
XLOC_020821	XLOC_020821	RDM1	chr17:34245069-34257780	s202	Ctrls	OK	3.6301	0.635966	-2.51299	-1.59471	0.00825	0.0445791
XLOC_002870	XLOC_002870	IFI6	chr1:27992571-27998729	s202	Ctrls	OK	394.551	69.4173	-2.50685	-4.57631	5e-05	0.000800523
XLOC_031026	XLOC_031026	CD86	chr3:121774212-121839983	s202	Ctrls	OK	12.8144	2.25484	-2.50667	-2.44975	0.00185	0.014432
XLOC_043164	XLOC_043164	PDIA4	chr7:148700153-148725733	s202	Ctrls	OK	86.9587	15.3123	-2.50564	-3.86846	5e-05	0.000800523
XLOC_010852	XLOC_010852	C12orf48	chr12:102513955-102591623	s202	Ctrls	OK	5.85149	1.03108	-2.50465	-2.51334	0.0005	0.00529702
XLOC_025024	XLOC_025024	CYBRD1	chr2:172378756-172414643	s202	Ctrls	OK	37.4285	6.5959	-2.5045	-3.01067	0.0004	0.00445852
XLOC_006986	XLOC_006986	ATHL1	chr11:289134-296107	s202	Ctrls	OK	57.1494	10.0865	-2.50231	-2.97836	0.00075	0.00720819
XLOC_040245	XLOC_040245	CD164	chr6:109687716-109703762	s202	Ctrls	OK	120.707	21.3392	-2.49993	-4.37061	5e-05	0.000800523
XLOC_015323	XLOC_015323	CATSPERB,TC2N	chr14:92047039-92333880	s202	Ctrls	OK	10.6015	1.88383	-2.49253	-1.55163	0.0039	0.0253436
XLOC_038892	XLOC_038892	FUT9	chr6:96463859-96653420	s202	Ctrls	OK	12.6197	2.24336	-2.49195	-3.63635	0.0008	0.00758608
XLOC_038804	XLOC_038804	TTK	chr6:80713603-80752244	s202	Ctrls	OK	5.49888	0.977771	-2.49157	-2.03206	0.0031	0.0214861
XLOC_001253	XLOC_001253	FAM46C	chr1:118148555-118170994	s202	Ctrls	OK	1.59967	0.284516	-2.4912	-2.66373	0.00885	0.0469036
XLOC_046791	XLOC_046791	DDX58	chr9:32455299-32526322	s202	Ctrls	OK	14.6204	2.60321	-2.48963	-3.97462	0.0001	0.00146536
XLOC_043188	XLOC_043188	GIMAP6	chr7:150322462-150329473	s202	Ctrls	OK	10.146	1.80859	-2.48798	-2.99998	0.00155	0.0126215
XLOC_010848	XLOC_010848	DRAM1	chr12:102271128-102405908	s202	Ctrls	OK	12.7395	2.27211	-2.4872	-2.6337	0.00425	0.0269573
XLOC_037807	XLOC_037807	SPARC	chr5:151040656-151104343	s202	Ctrls	OK	919.766	164.171	-2.48607	-3.17917	0.00075	0.00720819
XLOC_020762	XLOC_020762	ABHD15	chr17:27887690-27894042	s202	Ctrls	OK	5.90756	1.0545	-2.486	-3.34919	0.00385	0.025142
XLOC_036998	XLOC_036998	FYB	chr5:39105337-39274630	s202	Ctrls	OK	12.1182	2.16689	-2.48348	-1.93688	0.00135	0.0113749
XLOC_023574	XLOC_023574	CTB-33G10.1.1	chr19:50222754-50223338	s202	Ctrls	OK	252.283	45.1442	-2.48243	-5.33417	0.00025	0.00306111
XLOC_000321	XLOC_000321	C1QB	chr1:22979254-22988031	s202	Ctrls	OK	269.632	48.3462	-2.47952	-3.82393	5e-05	0.000800523
XLOC_027016	XLOC_027016	COL5A2	chr2:189896621-190044605	s202	Ctrls	OK	22.9939	4.12705	-2.47806	-3.69829	0.0001	0.00146536
XLOC_047654	XLOC_047654	AGPAT2	chr9:139567594-139581875	s202	Ctrls	OK	8.17553	1.46898	-2.4765	-2.77759	0.0058	0.0340919
XLOC_010738	XLOC_010738	TMTC3	chr12:88536072-88593664	s202	Ctrls	OK	7.05382	1.27001	-2.47357	-3.20687	0.00045	0.00488975
XLOC_002047	XLOC_002047	SOX13	chr1:204042242-204096863	s202	Ctrls	OK	48.4429	8.72514	-2.47304	-3.41215	0.00015	0.00202358
XLOC_051057	XLOC_051057	PGRMC1	chrX:118370215-118378429	s202	Ctrls	OK	351.324	63.438	-2.46938	-4.1744	5e-05	0.000800523
XLOC_019719	XLOC_019719	FAM18B1	chr17:18684518-18710027	s202	Ctrls	OK	36.0422	6.53848	-2.46266	-3.91478	0.0001	0.00146536
XLOC_011379	XLOC_011379	HEBP1	chr12:13080659-13193613	s202	Ctrls	OK	91.5042	16.6022	-2.46246	-3.35379	0.0007	0.00682663
XLOC_022008	XLOC_022008	HMG20B	chr19:3572774-3579086	s202	Ctrls	OK	61.7749	11.2159	-2.46147	-2.69492	0.0001	0.00146536
XLOC_025379	XLOC_025379	CTDSP1	chr2:219262978-219270664	s202	Ctrls	OK	58.1384	10.5786	-2.45835	-3.30495	5e-05	0.000800523
XLOC_039184	XLOC_039184	RAB32	chr6:146864828-146876101	s202	Ctrls	OK	18.8324	3.42681	-2.45828	-3.63445	0.0043	0.0272311
XLOC_027313	XLOC_027313	IRS1	chr2:227599756-227664475	s202	Ctrls	OK	30.3121	5.52089	-2.45692	-2.93867	0.00135	0.0113749
XLOC_020178	XLOC_020178	PRR11	chr17:57233100-57279924	s202	Ctrls	OK	4.09162	0.747184	-2.45314	-2.82798	0.00955	0.0498038
XLOC_035827	XLOC_035827	CCNB1	chr5:68462836-68474072	s202	Ctrls	OK	35.9132	6.56007	-2.45273	-3.06002	0.001	0.00907991
XLOC_025469	XLOC_025469	SP100	chr2:231280656-231444721	s202	Ctrls	OK	38.5743	7.05445	-2.45103	-2.18035	0.0029	0.0203841
XLOC_051050	XLOC_051050	IL13RA1	chrX:117861534-117928502	s202	Ctrls	OK	22.3061	4.08332	-2.44962	-3.62915	5e-05	0.000800523
XLOC_012728	XLOC_012728	DLEU1	chr13:50601268-51423145	s202	Ctrls	OK	20.575	3.77438	-2.44658	-1.66849	0.00105	0.00941355
XLOC_001537	XLOC_001537	ZBTB7B	chr1:154975126-155006257	s202	Ctrls	OK	15.2575	2.80427	-2.44382	-3.18694	0.0017	0.0135543
XLOC_024051	XLOC_024051	EML4	chr2:42370377-42559688	s202	Ctrls	OK	59.7597	10.9869	-2.44338	-3.8291	5e-05	0.000800523
XLOC_025277	XLOC_025277	NRP2	chr2:206546561-206662857	s202	Ctrls	OK	32.1773	5.91604	-2.44334	-3.09985	0.00015	0.00202358
XLOC_033907	XLOC_033907	ELMOD2	chr4:141445311-141474924	s202	Ctrls	OK	21.4588	3.95477	-2.4399	-3.03911	0.0011	0.00977368
XLOC_025704	XLOC_025704	AC064875.2.1	chr2:13106909-13147138	s202	Ctrls	OK	6.64493	1.22617	-2.43809	-2.16735	0.0087	0.0463309
XLOC_023000	XLOC_023000	DENND1C	chr19:6464259-6481798	s202	Ctrls	OK	4.76731	0.882706	-2.43317	-2.70394	0.00945	0.0494118
XLOC_008644	XLOC_008644	STK33	chr11:8413417-8615836	s202	Ctrls	OK	11.3596	2.10404	-2.43268	-1.97467	0.00135	0.0113749
XLOC_003428	XLOC_003428	GBP2,GBP7	chr1:89571814-89641723	s202	Ctrls	OK	23.5279	4.36508	-2.43029	-3.62757	0.00085	0.00795026
XLOC_015933	XLOC_015933	CHST14	chr15:40763159-40765353	s202	Ctrls	OK	17.0292	3.16087	-2.42961	-3.23351	0.0013	0.0110709
XLOC_041450	XLOC_041450	TRIM56	chr7:100728719-100735017	s202	Ctrls	OK	8.04344	1.49498	-2.42769	-2.17929	0.0073	0.0406954
XLOC_004159	XLOC_004159	CREG1	chr1:167498913-167523004	s202	Ctrls	OK	164.615	30.6117	-2.42694	-4.24026	5e-05	0.000800523
XLOC_001247	XLOC_001247	TTF2	chr1:117602924-117645492	s202	Ctrls	OK	7.17879	1.33594	-2.42589	-2.27647	0.00405	0.0260713
XLOC_043542	XLOC_043542	RBPMS	chr8:30239634-30429778	s202	Ctrls	OK	60.5557	11.2697	-2.42582	-2.96892	5e-05	0.000800523
XLOC_014707	XLOC_014707	RNASE1	chr14:21269386-21271437	s202	Ctrls	OK	136.095	25.3302	-2.42568	-3.69641	0.0002	0.00256581
XLOC_039172	XLOC_039172	LTV1,PHACTR2,RP3-468K18.5.1	chr6:143857981-144184949	s202	Ctrls	OK	53.7772	10.0118	-2.4253	-3.01269	0.0002	0.00256581
XLOC_034716	XLOC_034716	CXCL10	chr4:76932336-77033955	s202	Ctrls	OK	48.4439	9.0246	-2.42438	-3.4211	0.0014	0.0116579
XLOC_050336	XLOC_050336	MBTPS2,YY2	chrX:21857753-21903542	s202	Ctrls	OK	28.5052	5.32023	-2.42167	-3.51511	5e-05	0.000800523
XLOC_020652	XLOC_020652	SHMT1	chr17:18231186-18266832	s202	Ctrls	OK	13.5954	2.54251	-2.4188	-2.93584	0.00045	0.00488975
XLOC_010955	XLOC_010955	OAS3	chr12:113344581-113455556	s202	Ctrls	OK	33.6317	6.29517	-2.41751	-1.97659	0.0076	0.0420729
XLOC_051552	XLOC_051552	TMEM47	chrX:34645180-34675405	s202	Ctrls	OK	64.9589	12.194	-2.41336	-4.52113	5e-05	0.000800523
XLOC_004311	XLOC_004311	ARPC5	chr1:183592400-183604892	s202	Ctrls	OK	310.454	58.3155	-2.41243	-4.148	5e-05	0.000800523
XLOC_052785	XLOC_052785	UTY	chrY:15360258-15592553	s202	Ctrls	OK	12.5358	2.35532	-2.41206	-2.2587	0.00625	0.0360654
XLOC_033365	XLOC_033365	SPATA18	chr4:52917496-52963458	s202	Ctrls	OK	3.84221	0.722189	-2.41149	-1.69489	0.0028	0.0198425
XLOC_007826	XLOC_007826	ALDH3B1	chr11:67776047-67797928	s202	Ctrls	OK	4.60058	0.864946	-2.41113	-1.87571	0.00625	0.0360654
XLOC_043514	XLOC_043514	PNOC	chr8:28107579-28200872	s202	Ctrls	OK	256.832	48.2892	-2.41106	-3.76313	0.0001	0.00146536
XLOC_023638	XLOC_023638	ZNF28	chr19:53300661-53324922	s202	Ctrls	OK	16.6101	3.12308	-2.41102	-3.07978	0.00035	0.00400446
XLOC_013253	XLOC_013253	EPSTI1	chr13:43460523-43566407	s202	Ctrls	OK	8.5243	1.60412	-2.4098	-2.34225	0.00085	0.00795026
XLOC_027877	XLOC_027877	NCOA3	chr20:46130600-46415360	s202	Ctrls	OK	38.6374	7.28011	-2.40796	-2.21306	0.0041	0.0262741
XLOC_013592	XLOC_013592	GRTP1	chr13:113978543-114018446	s202	Ctrls	OK	10.0986	1.90506	-2.40625	-3.11466	0.00835	0.044985
XLOC_006212	XLOC_006212	ITGB1	chr10:33189246-33371030	s202	Ctrls	OK	66.8588	12.614	-2.40609	-2.89492	0.0007	0.00682663
XLOC_014078	XLOC_014078	SOCS4	chr14:55493947-55516206	s202	Ctrls	OK	19.1158	3.60898	-2.40511	-4.07777	5e-05	0.000800523
XLOC_036542	XLOC_036542	CCNG1	chr5:162864574-162875197	s202	Ctrls	OK	117.829	22.2678	-2.40366	-3.67049	0.0002	0.00256581
XLOC_001321	XLOC_001321	ITGA10	chr1:145524890-145543868	s202	Ctrls	OK	24.6143	4.65916	-2.40136	-2.76451	0.00185	0.014432
XLOC_023156	XLOC_023156	NOTCH3	chr19:15270444-15311792	s202	Ctrls	OK	34.5996	6.55636	-2.39979	-3.88959	5e-05	0.000800523
XLOC_028118	XLOC_028118	PCNA	chr20:5095598-5107272	s202	Ctrls	OK	76.0732	14.416	-2.39972	-3.90828	5e-05	0.000800523
XLOC_041900	XLOC_041900	GIMAP4	chr7:150264364-150271041	s202	Ctrls	OK	19.3844	3.67427	-2.39937	-3.11579	0.00095	0.00872149
XLOC_037494	XLOC_037494	PGGT1B	chr5:114546526-114598569	s202	Ctrls	OK	11.0642	2.10399	-2.3947	-2.5136	0.004	0.0258079
XLOC_013839	XLOC_013839	LRP10	chr14:23340821-23350789	s202	Ctrls	OK	62.2847	11.9242	-2.38498	-3.0553	0.0002	0.00256581
XLOC_002803	XLOC_002803	HMGCL	chr1:24128374-24165110	s202	Ctrls	OK	25.9843	4.98443	-2.38214	-3.13103	0.001	0.00907991
XLOC_001043	XLOC_001043	ABCD3	chr1:94883932-94984222	s202	Ctrls	OK	72.4441	13.9031	-2.38146	-4.26473	5e-05	0.000800523
XLOC_020959	XLOC_020959	STAT3	chr17:40465341-40540449	s202	Ctrls	OK	173.466	33.3213	-2.38013	-2.93772	0.0006	0.00610906
XLOC_030912	XLOC_030912	ALCAM	chr3:105085752-105295744	s202	Ctrls	OK	115.203	22.1501	-2.3788	-3.8633	0.00015	0.00202358
XLOC_002754	XLOC_002754	TMCO4	chr1:20008705-20126438	s202	Ctrls	OK	4.06274	0.781832	-2.37752	-1.53637	0.0043	0.0272311
XLOC_019315	XLOC_019315	ZFHX3	chr16:72779301-73093597	s202	Ctrls	OK	7.01347	1.35005	-2.37711	-2.59009	0.00025	0.00306111
XLOC_018146	XLOC_018146	MT1X	chr16:56716335-56721719	s202	Ctrls	OK	120.619	23.2545	-2.37488	-3.02482	0.00465	0.0288054
XLOC_006221	XLOC_006221	PARD3	chr10:34398487-35104253	s202	Ctrls	OK	21.2412	4.0952	-2.37486	-2.93562	0.0004	0.00445852
XLOC_001453	XLOC_001453	CGN	chr1:151482985-151511168	s202	Ctrls	OK	36.1223	6.96826	-2.37402	-2.83004	0.00045	0.00488975
XLOC_022977	XLOC_022977	PLIN3	chr19:4838345-4867780	s202	Ctrls	OK	29.0547	5.62006	-2.37011	-3.9226	0.0008	0.00758608
XLOC_021781	XLOC_021781	DSC2	chr18:28645939-28682378	s202	Ctrls	OK	14.8613	2.87561	-2.36962	-3.80571	0.0001	0.00146536
XLOC_013163	XLOC_013163	LINC00426	chr13:30914406-30951282	s202	Ctrls	OK	5.5357	1.07224	-2.36814	-1.55432	0.00725	0.0404961
XLOC_020566	XLOC_020566	PIK3R5	chr17:8782227-8869024	s202	Ctrls	OK	5.80122	1.12559	-2.36567	-2.99536	0.00495	0.0301565
XLOC_023731	XLOC_023731	ZIM2,ZIM2.1	chr19:57285919-57352097	s202	Ctrls	OK	98.6167	19.1347	-2.36564	-2.62448	0.0017	0.0135543
XLOC_027787	XLOC_027787	FAM83D	chr20:37554954-37581703	s202	Ctrls	OK	4.76687	0.928654	-2.35983	-2.78844	0.00605	0.0351664
XLOC_017071	XLOC_017071	RPS27L	chr15:63413998-63450220	s202	Ctrls	OK	144.498	28.1543	-2.35962	-2.97031	0.00245	0.0179045
XLOC_023546	XLOC_023546	MAMSTR	chr19:49216254-49222978	s202	Ctrls	OK	8.76983	1.70945	-2.35902	-2.71897	0.00655	0.0373414
XLOC_044942	XLOC_044942	TRAM1	chr8:71485676-71520622	s202	Ctrls	OK	92.5614	18.0597	-2.35763	-3.6825	0.0002	0.00256581
XLOC_040098	XLOC_040098	IBTK	chr6:82879699-82957471	s202	Ctrls	OK	54.7195	10.6816	-2.35692	-4.01003	5e-05	0.000800523
XLOC_007963	XLOC_007963	ACER3	chr11:76571910-76737841	s202	Ctrls	OK	36.0051	7.03294	-2.356	-3.22274	0.00045	0.00488975
XLOC_052156	XLOC_052156	C1GALT1C1	chrX:119759647-119764005	s202	Ctrls	OK	25.3371	4.954	-2.35459	-3.3987	0.00105	0.00941355
XLOC_031803	XLOC_031803	EOMES	chr3:27757439-27764206	s202	Ctrls	OK	6.92092	1.35483	-2.35285	-2.75801	0.00425	0.0269573
XLOC_023816	XLOC_023816	TAF1B	chr2:9983482-10074537	s202	Ctrls	OK	15.5897	3.05277	-2.35241	-2.85159	0.0013	0.0110709
XLOC_051519	XLOC_051519	EEF1B2P3	chrX:24712035-25015103	s202	Ctrls	OK	468.898	91.883	-2.3514	-4.17669	0.00285	0.0201537
XLOC_047272	XLOC_047272	SLC35D2	chr9:99082987-99145992	s202	Ctrls	OK	16.904	3.31658	-2.3496	-2.96986	0.00165	0.0132513
XLOC_022790	XLOC_022790	LILRB4	chr19:55155339-55181810	s202	Ctrls	OK	20.9562	4.11212	-2.34942	-2.26715	0.0089	0.0471183
XLOC_017464	XLOC_017464	TTC23	chr15:99676527-99791428	s202	Ctrls	OK	10.6254	2.08793	-2.34737	-1.60188	0.0034	0.0231221
XLOC_028545	XLOC_028545	NFATC2	chr20:50003493-50179339	s202	Ctrls	OK	5.05878	0.99471	-2.34644	-2.20259	0.0041	0.0262741
XLOC_035168	XLOC_035168	SH3D19	chr4:152041430-152149182	s202	Ctrls	OK	18.6081	3.65934	-2.34627	-3.25005	0.0004	0.00445852
XLOC_019978	XLOC_019978	STAT5A	chr17:40439564-40463961	s202	Ctrls	OK	10.9364	2.15112	-2.34598	-2.49532	0.0005	0.00529702
XLOC_028602	XLOC_028602	SLMO2	chr20:57608199-57617964	s202	Ctrls	OK	44.2345	8.70747	-2.34485	-3.25017	0.00095	0.00872149
XLOC_003951	XLOC_003951	RAB13	chr1:153954126-153958834	s202	Ctrls	OK	30.3154	5.96854	-2.3446	-2.89639	0.0021	0.0159505
XLOC_010291	XLOC_010291	ANO6	chr12:45566846-45834187	s202	Ctrls	OK	34.617	6.82748	-2.34205	-4.1127	0.00015	0.00202358
XLOC_035449	XLOC_035449	NKD2	chr5:1008943-1039058	s202	Ctrls	OK	40.0911	7.93041	-2.33782	-3.33914	0.0017	0.0135543
XLOC_044006	XLOC_044006	MTDH	chr8:98656406-98740998	s202	Ctrls	OK	61.8451	12.2386	-2.33722	-3.26295	0.0003	0.00353406
XLOC_009274	XLOC_009274	CPT1A	chr11:68522087-68611878	s202	Ctrls	OK	46.1172	9.12888	-2.3368	-3.60512	5e-05	0.000800523
XLOC_001945	XLOC_001945	RGS1	chr1:192544856-192549161	s202	Ctrls	OK	58.466	11.5932	-2.33432	-3.15898	0.0007	0.00682663
XLOC_043926	XLOC_043926	LRRCC1	chr8:86019322-86058315	s202	Ctrls	OK	7.57146	1.50188	-2.3338	-2.90762	0.00215	0.0162065
XLOC_027505	XLOC_027505	CDC25B	chr20:3767577-3786762	s202	Ctrls	OK	139.162	27.7002	-2.3288	-3.02763	0.00045	0.00488975
XLOC_009716	XLOC_009716	AMICA1	chr11:118064454-118095809	s202	Ctrls	OK	5.43211	1.08246	-2.3272	-1.49767	0.0094	0.0491892
XLOC_035911	XLOC_035911	F2R	chr5:75699073-76031606	s202	Ctrls	OK	36.3927	7.25281	-2.32704	-2.33623	0.0057	0.0336934
XLOC_043042	XLOC_043042	CREB3L2	chr7:137559724-137686813	s202	Ctrls	OK	12.0512	2.40248	-2.32658	-3.09266	0.0003	0.00353406
XLOC_015200	XLOC_015200	NPC2	chr14:74942894-74963809	s202	Ctrls	OK	109.956	21.9647	-2.32367	-3.78862	0.0005	0.00529702
XLOC_014207	XLOC_014207	KIAA0247	chr14:70078312-70181859	s202	Ctrls	OK	65.3866	13.0687	-2.32288	-2.61413	0.00135	0.0113749
XLOC_030924	XLOC_030924	BBX	chr3:107241782-107530171	s202	Ctrls	OK	27.5773	5.5127	-2.32265	-1.40183	0.0062	0.0358392
XLOC_009262	XLOC_009262	UNC93B1	chr11:67758574-67772452	s202	Ctrls	OK	28.2988	5.65753	-2.3225	-2.38901	0.00395	0.0255766
XLOC_031822	XLOC_031822	CMTM6	chr3:32433162-32544900	s202	Ctrls	OK	49.579	9.93422	-2.31925	-2.96388	0.0014	0.0116579
XLOC_044236	XLOC_044236	ST13P6	chr8:134420248-134421471	s202	Ctrls	OK	93.8921	18.8328	-2.31776	-2.30617	0.0062	0.0358392
XLOC_014398	XLOC_014398	IFI27L1	chr14:94547627-94570192	s202	Ctrls	OK	91.1279	18.2896	-2.31687	-3.16274	0.001	0.00907991
XLOC_027526	XLOC_027526	MCM8	chr20:5931297-5975852	s202	Ctrls	OK	6.4129	1.29368	-2.30949	-2.98785	0.0029	0.0203841
XLOC_050942	XLOC_050942	WBP5	chrX:102611372-102613397	s202	Ctrls	OK	98.3999	19.8564	-2.30905	-3.74458	0.0002	0.00256581
XLOC_021406	XLOC_021406	MYL12A	chr18:3247527-3256234	s202	Ctrls	OK	176.07	35.5613	-2.30777	-3.9272	0.0002	0.00256581
XLOC_012530	XLOC_012530	SGCG	chr13:23755090-23899304	s202	Ctrls	OK	20.466	4.13733	-2.30646	-3.27693	0.0017	0.0135543
XLOC_013866	XLOC_013866	PSME1	chr14:24605366-24610797	s202	Ctrls	OK	219.559	44.3941	-2.30617	-4.03254	0.00045	0.00488975
XLOC_036377	XLOC_036377	PCDHB11	chr5:140579182-140582618	s202	Ctrls	OK	6.78673	1.3732	-2.30517	-2.77813	0.0034	0.0231221
XLOC_023050	XLOC_023050	ZNF121	chr19:9672858-9695209	s202	Ctrls	OK	14.3924	2.91243	-2.30501	-3.11649	0.00345	0.0233901
XLOC_019293	XLOC_019293	FTSJD1	chr16:71315291-71323618	s202	Ctrls	OK	24.7018	5.00323	-2.30368	-3.73455	0.0001	0.00146536
XLOC_024385	XLOC_024385	THNSL2	chr2:88469834-88486146	s202	Ctrls	OK	19.8758	4.04814	-2.29568	-2.34696	0.00185	0.014432
XLOC_015232	XLOC_015232	RP11-488C13.1.1	chr14:77352719-77353093	s202	Ctrls	OK	156.279	31.8326	-2.29555	-5.64398	0.00215	0.0162065
XLOC_001233	XLOC_001233	VANGL1	chr1:116184573-116240845	s202	Ctrls	OK	7.83108	1.5957	-2.29502	-2.0722	0.00275	0.0195719
XLOC_032756	XLOC_032756	GOLIM4	chr3:167726464-167813763	s202	Ctrls	OK	20.6403	4.20759	-2.2944	-3.37199	0.0001	0.00146536
XLOC_004100	XLOC_004100	ARHGAP30	chr1:161016735-161039760	s202	Ctrls	OK	9.4799	1.9355	-2.29216	-1.85295	0.0089	0.0471183
XLOC_018429	XLOC_018429	IRF8	chr16:85932408-85956197	s202	Ctrls	OK	16.23	3.31667	-2.29085	-2.30595	0.00195	0.0149656
XLOC_012163	XLOC_012163	NUP37	chr12:102457132-102513902	s202	Ctrls	OK	19.0668	3.9008	-2.28923	-2.56566	0.0014	0.0116579
XLOC_031212	XLOC_031212	PLS1	chr3:142315228-142432506	s202	Ctrls	OK	6.74836	1.38307	-2.28666	-1.89447	0.005	0.0304052
XLOC_043740	XLOC_043740	LYN	chr8:56792371-56923939	s202	Ctrls	OK	40.9721	8.3995	-2.28627	-3.68934	0.0001	0.00146536
XLOC_005916	XLOC_005916	FANK1	chr10:127585107-127698161	s202	Ctrls	OK	8.29298	1.7016	-2.285	-1.54729	0.0034	0.0231221
XLOC_035807	XLOC_035807	SREK1	chr5:65435798-65479443	s202	Ctrls	OK	70.8978	14.553	-2.28443	-2.86105	0.0016	0.0129439
XLOC_035106	XLOC_035106	CLGN	chr4:141309608-141349122	s202	Ctrls	OK	4.40732	0.905924	-2.28244	-2.50105	0.00585	0.0342542
XLOC_008544	XLOC_008544	TRIM21	chr11:4406126-4414926	s202	Ctrls	OK	18.4062	3.78559	-2.2816	-2.87065	0.00355	0.023897
XLOC_038154	XLOC_038154	CD83	chr6:14117871-14137149	s202	Ctrls	OK	78.5372	16.1719	-2.27989	-4.26062	0.00015	0.00202358
XLOC_023552	XLOC_023552	HSD17B14	chr19:49316278-49339934	s202	Ctrls	OK	30.9052	6.36636	-2.27931	-3.83486	0.0023	0.017021
XLOC_010818	XLOC_010818	TMPO	chr12:98906750-98944157	s202	Ctrls	OK	55.6546	11.4678	-2.27892	-3.52957	0.00035	0.00400446
XLOC_040321	XLOC_040321	MAN1A1	chr6:119498373-119670926	s202	Ctrls	OK	22.1149	4.55768	-2.27865	-3.6977	0.0002	0.00256581
XLOC_050320	XLOC_050320	NHS	chrX:17393542-17754114	s202	Ctrls	OK	9.31441	1.92305	-2.27606	-2.38402	0.0036	0.024103
XLOC_026783	XLOC_026783	PRPF40A	chr2:153508106-153617688	s202	Ctrls	OK	37.6895	7.78176	-2.27599	-1.81827	0.00455	0.0284161
XLOC_005620	XLOC_005620	TNKS2	chr10:93558068-93625033	s202	Ctrls	OK	101.848	21.1494	-2.26773	-3.7669	0.00025	0.00306111
XLOC_020038	XLOC_020038	HEXIM1	chr17:43224683-43236822	s202	Ctrls	OK	40.0493	8.3461	-2.2626	-3.80927	0.0001	0.00146536
XLOC_005859	XLOC_005859	NANOS1	chr10:120789227-120793854	s202	Ctrls	OK	16.0785	3.35122	-2.26238	-3.49232	0.0004	0.00445852
XLOC_047392	XLOC_047392	LPAR1	chr9:113635542-113800981	s202	Ctrls	OK	63.2623	13.1856	-2.26238	-3.01243	0.00195	0.0149656
XLOC_043592	XLOC_043592	ERLIN2	chr8:37592278-37616619	s202	Ctrls	OK	35.3006	7.35875	-2.26216	-2.97783	0.0006	0.00610906
XLOC_032094	XLOC_032094	FAM107A	chr3:58549843-58652575	s202	Ctrls	OK	563.134	117.527	-2.26048	-2.9231	0.0023	0.017021
XLOC_036528	XLOC_036528	PTTG1	chr5:159848828-159855748	s202	Ctrls	OK	55.7157	11.6285	-2.26042	-3.13058	0.0016	0.0129439
XLOC_017072	XLOC_017072	CA12	chr15:63613576-63674360	s202	Ctrls	OK	12.6861	2.65233	-2.25791	-2.6374	0.0015	0.0122848
XLOC_031938	XLOC_031938	CCR1	chr3:46205095-46308197	s202	Ctrls	OK	7.48936	1.56616	-2.25761	-2.86159	0.007	0.0393874
XLOC_008780	XLOC_008780	CCDC34	chr11:27352373-27385415	s202	Ctrls	OK	24.4183	5.13038	-2.25083	-3.01798	0.00135	0.0113749
XLOC_037998	XLOC_037998	ADAMTS2	chr5:178537851-178772431	s202	Ctrls	OK	4.72776	0.994476	-2.24915	-1.68662	0.00795	0.0435019
XLOC_006513	XLOC_006513	P4HA1	chr10:74766974-74856732	s202	Ctrls	OK	84.1047	17.6976	-2.24863	-3.1137	0.0017	0.0135543
XLOC_051170	XLOC_051170	ZNF449	chrX:134478720-134497077	s202	Ctrls	OK	9.70104	2.04484	-2.24615	-2.93621	0.0014	0.0116579
XLOC_038603	XLOC_038603	PTK7	chr6:43044005-43129457	s202	Ctrls	OK	116.124	24.4886	-2.24549	-2.8953	0.00065	0.00642408
XLOC_039486	XLOC_039486	DEK	chr6:18224098-18265054	s202	Ctrls	OK	62.4522	13.1958	-2.24267	-3.59063	5e-05	0.000800523
XLOC_046336	XLOC_046336	TLR4	chr9:120466609-120479149	s202	Ctrls	OK	6.10036	1.28926	-2.24235	-2.43157	0.00515	0.031127
XLOC_038992	XLOC_038992	RPF2	chr6:111303217-111347303	s202	Ctrls	OK	14.6478	3.09911	-2.24076	-2.74556	0.00455	0.0284161
XLOC_011836	XLOC_011836	TMEM194A	chr12:57449425-57481846	s202	Ctrls	OK	21.9648	4.65168	-2.23937	-3.88712	5e-05	0.000800523
XLOC_026116	XLOC_026116	C1D	chr2:68268261-68338080	s202	Ctrls	OK	17.9113	3.79674	-2.23804	-3.14481	0.0023	0.017021
XLOC_021132	XLOC_021132	TRIM25	chr17:54965269-54991409	s202	Ctrls	OK	25.8829	5.48951	-2.23725	-3.52615	0.00045	0.00488975
XLOC_051461	XLOC_051461	PIR	chrX:15402920-15574652	s202	Ctrls	OK	24.0365	5.10275	-2.23588	-3.21307	0.00275	0.0195719
XLOC_029542	XLOC_029542	FBXO7	chr22:32870662-32894818	s202	Ctrls	OK	177.696	37.7538	-2.23472	-3.72166	0.0002	0.00256581
XLOC_022655	XLOC_022655	MYH14	chr19:50706884-50813802	s202	Ctrls	OK	15.1839	3.2262	-2.23463	-3.10406	0.00085	0.00795026
XLOC_000028	XLOC_000028	ISG15	chr1:948802-949920	s202	Ctrls	OK	162.962	34.6428	-2.23391	-4.7144	0.00045	0.00488975
XLOC_029209	XLOC_029209	USP18	chr22:18632665-18688682	s202	Ctrls	OK	9.34978	1.98821	-2.23346	-3.03492	0.00395	0.0255766
XLOC_041444	XLOC_041444	TRIP6	chr7:100464759-100471076	s202	Ctrls	OK	46.791	9.95431	-2.23284	-2.79933	0.0007	0.00682663
XLOC_015902	XLOC_015902	SPRED1	chr15:38544526-38649450	s202	Ctrls	OK	51.5802	10.9787	-2.23211	-3.31131	0.00035	0.00400446
XLOC_037572	XLOC_037572	ALDH7A1	chr5:125877532-125931110	s202	Ctrls	OK	114.758	24.4656	-2.22977	-2.71671	0.0008	0.00758608
XLOC_005621	XLOC_005621	BTAF1	chr10:93683821-93790082	s202	Ctrls	OK	95.508	20.3811	-2.22839	-3.46595	0.00035	0.00400446
XLOC_030177	XLOC_030177	AL049757.3.1	chr22:43172411-43173302	s202	Ctrls	OK	45.8236	9.78144	-2.22797	-3.77342	0.00455	0.0284161
XLOC_005404	XLOC_005404	SRGN	chr10:70847861-70864567	s202	Ctrls	OK	134.055	28.6492	-2.22626	-3.91043	0.00015	0.00202358
XLOC_026523	XLOC_026523	SLC35F5	chr2:114462587-114514400	s202	Ctrls	OK	69.8741	14.9515	-2.22447	-2.81076	0.0031	0.0214861
XLOC_036224	XLOC_036224	SLC12A2	chr5:127419457-127525380	s202	Ctrls	OK	30.6914	6.56986	-2.2239	-2.57942	0.00325	0.0223234
XLOC_007908	XLOC_007908	P2RY6	chr11:72975549-73009662	s202	Ctrls	OK	3.00622	0.643727	-2.22343	-1.30392	0.0048	0.0294866
XLOC_030055	XLOC_030055	APOL2	chr22:36622255-36636000	s202	Ctrls	OK	50.7159	10.8611	-2.22327	-3.03124	0.00065	0.00642408
XLOC_043878	XLOC_043878	CRISPLD1	chr8:75896749-75946793	s202	Ctrls	OK	25.717	5.52875	-2.2177	-2.63915	0.00625	0.0360654
XLOC_040271	XLOC_040271	LAMA4	chr6:112429962-112627885	s202	Ctrls	OK	35.5863	7.68753	-2.21073	-1.5386	0.00865	0.0461883
XLOC_030961	XLOC_030961	SIDT1	chr3:113251142-113348425	s202	Ctrls	OK	32.7381	7.07703	-2.20975	-2.71472	0.0011	0.00977368
XLOC_035224	XLOC_035224	CTSO	chr4:156845269-156875069	s202	Ctrls	OK	20.4151	4.41423	-2.2094	-3.42049	0.00045	0.00488975
XLOC_000164	XLOC_000164	PLOD1	chr1:11994261-12035599	s202	Ctrls	OK	68.0523	14.7244	-2.20844	-3.41632	0.00015	0.00202358
XLOC_002383	XLOC_002383	EXO1	chr1:242011268-242058450	s202	Ctrls	OK	2.55529	0.553095	-2.20789	-1.05539	0.006	0.034937
XLOC_017422	XLOC_017422	RGMA	chr15:93586635-93632433	s202	Ctrls	OK	160.359	34.758	-2.20588	-3.47844	0.0004	0.00445852		RGMA
XLOC_038578	XLOC_038578	MDFI	chr6:41604619-41621984	s202	Ctrls	OK	33.1009	7.17997	-2.20482	-2.70962	0.00055	0.00572905
XLOC_005051	XLOC_005051	PLXDC2	chr10:20105167-20569286	s202	Ctrls	OK	14.9981	3.25449	-2.20428	-3.11998	0.00135	0.0113749
XLOC_022498	XLOC_022498	RPS19	chr19:42363987-42375482	s202	Ctrls	OK	769.577	167.04	-2.20387	-4.24348	0.00035	0.00400446
XLOC_008458	XLOC_008458	IFITM3	chr11:319668-321340	s202	Ctrls	OK	999.943	217.356	-2.20179	-3.32993	0.00025	0.00306111
XLOC_038636	XLOC_038636	ENPP4	chr6:46097700-46114435	s202	Ctrls	OK	17.7542	3.86102	-2.20111	-3.71186	0.0003	0.00353406
XLOC_021742	XLOC_021742	ESCO1	chr18:19109263-19180845	s202	Ctrls	OK	7.69877	1.67769	-2.19815	-3.27403	0.00145	0.0119789
XLOC_030880	XLOC_030880	TBC1D23	chr3:99979843-100044095	s202	Ctrls	OK	44.3217	9.66101	-2.19777	-3.70196	5e-05	0.000800523
XLOC_043055	XLOC_043055	ZC3HAV1	chr7:138728265-138794465	s202	Ctrls	OK	21.3063	4.65999	-2.19288	-2.88004	0.0013	0.0110709
XLOC_036380	XLOC_036380	PCDHB14	chr5:140602930-140605858	s202	Ctrls	OK	41.7443	9.13161	-2.19264	-3.57833	0.0003	0.00353406
XLOC_007378	XLOC_007378	LDLRAD3	chr11:35965530-36253686	s202	Ctrls	OK	35.1376	7.68772	-2.19239	-3.79103	0.0001	0.00146536
XLOC_039227	XLOC_039227	MTHFD1L	chr6:151186684-151549582	s202	Ctrls	OK	37.3931	8.20203	-2.18872	-2.16462	0.0026	0.0187662
XLOC_023351	XLOC_023351	MAP4K1	chr19:39078280-39108643	s202	Ctrls	OK	5.47424	1.20224	-2.18693	-2.51441	0.0058	0.0340919
XLOC_006799	XLOC_006799	OBFC1	chr10:105642299-105677963	s202	Ctrls	OK	8.63999	1.89914	-2.18568	-2.53307	0.0082	0.0443934
XLOC_036471	XLOC_036471	G3BP1	chr5:151121876-151192346	s202	Ctrls	OK	59.9119	13.2046	-2.1818	-2.35139	0.0041	0.0262741
XLOC_023393	XLOC_023393	BLVRB	chr19:40953692-40971725	s202	Ctrls	OK	65.7647	14.4962	-2.18164	-4.10484	0.00175	0.0138365
XLOC_003565	XLOC_003565	SLC25A24	chr1:108676657-108744113	s202	Ctrls	OK	13.7367	3.02879	-2.18123	-3.14392	0.00205	0.0156185
XLOC_020029	XLOC_020029	FZD2	chr17:42634826-42636907	s202	Ctrls	OK	19.1547	4.22508	-2.18065	-2.48914	0.0025	0.0181631
XLOC_041556	XLOC_041556	NAA38	chr7:117824085-117832878	s202	Ctrls	OK	35.7437	7.89833	-2.17807	-2.90626	0.0012	0.0104065
XLOC_021138	XLOC_021138	CUEDC1	chr17:55940336-56032684	s202	Ctrls	OK	51.3979	11.3651	-2.1771	-2.88478	0.0007	0.00682663
XLOC_032223	XLOC_032223	PROS1	chr3:93591880-93692910	s202	Ctrls	OK	13.8686	3.06828	-2.17632	-3.28219	0.0005	0.00529702
XLOC_011593	XLOC_011593	TWF1	chr12:44187525-44200178	s202	Ctrls	OK	36.376	8.05275	-2.17543	-3.37569	0.0003	0.00353406
XLOC_011919	XLOC_011919	LLPH,RP11-745O10.4.1,TMBIM4	chr12:66516841-66563852	s202	Ctrls	OK	160.768	35.6074	-2.17473	-2.81636	0.00155	0.0126215
XLOC_031392	XLOC_031392	SKIL	chr3:170075465-170114623	s202	Ctrls	OK	26.4821	5.8665	-2.17444	-2.8128	0.0012	0.0104065
XLOC_033537	XLOC_033537	MTHFD2L	chr4:74979890-75168816	s202	Ctrls	OK	29.8999	6.63597	-2.17176	-3.01622	0.0006	0.00610906
XLOC_051778	XLOC_051778	USP51	chrX:55511048-55515635	s202	Ctrls	OK	7.16364	1.59362	-2.16839	-3.20268	0.00245	0.0179045
XLOC_037796	XLOC_037796	TNIP1	chr5:150409505-150473138	s202	Ctrls	OK	93.4709	20.7955	-2.16825	-2.98951	0.00025	0.00306111
XLOC_008140	XLOC_008140	BIRC3	chr11:102188214-102210134	s202	Ctrls	OK	6.1189	1.36228	-2.16724	-2.41601	0.003	0.0209389
XLOC_032723	XLOC_032723	RP11-3P17.3.1	chr3:161144214-161166030	s202	Ctrls	OK	601.035	133.953	-2.16572	-4.3726	0.0002	0.00256581
XLOC_007800	XLOC_007800	SYT12	chr11:66774248-66818334	s202	Ctrls	OK	18.0283	4.02658	-2.16263	-2.86024	0.00145	0.0119789
XLOC_007885	XLOC_007885	FOLR2	chr11:71927644-71932994	s202	Ctrls	OK	14.7316	3.2922	-2.16179	-2.41908	0.00195	0.0149656
XLOC_046249	XLOC_046249	SMC2	chr9:106856540-106903698	s202	Ctrls	OK	10.5601	2.36216	-2.16045	-3.29751	0.00055	0.00572905
XLOC_050350	XLOC_050350	PRDX4	chrX:23682378-23704516	s202	Ctrls	OK	103.611	23.2283	-2.15723	-3.22813	0.0003	0.00353406
XLOC_013112	XLOC_013112	PARP4	chr13:24982294-25171814	s202	Ctrls	OK	22.6101	5.07368	-2.15587	-3.08778	0.0008	0.00758608
XLOC_039419	XLOC_039419	CAGE1,SSR1	chr6:7268538-7418270	s202	Ctrls	OK	76.1962	17.1101	-2.15487	-2.19614	0.0084	0.0451687
XLOC_002793	XLOC_002793	ZNF436	chr1:23685940-23698332	s202	Ctrls	OK	88.528	19.9236	-2.15165	-3.41737	0.00035	0.00400446
XLOC_024113	XLOC_024113	ERLEC1	chr2:53759809-54087297	s202	Ctrls	OK	73.4281	16.542	-2.1502	-2.45611	0.0077	0.0424493
XLOC_035648	XLOC_035648	IL7R	chr5:35852796-35879705	s202	Ctrls	OK	3.80369	0.858304	-2.14784	-1.55251	0.00395	0.0255766
XLOC_036376	XLOC_036376	PCDHB10	chr5:140571941-140575215	s202	Ctrls	OK	19.9357	4.50309	-2.14637	-3.64797	0.0008	0.00758608
XLOC_021146	XLOC_021146	RNF43	chr17:56429860-56494480	s202	Ctrls	OK	9.14574	2.06646	-2.14594	-3.2597	0.001	0.00907991
XLOC_036466	XLOC_036466	GM2A	chr5:150560612-150650001	s202	Ctrls	OK	26.4043	5.97406	-2.14399	-3.18919	0.0006	0.00610906
XLOC_044210	XLOC_044210	MIR1204,PVT1	chr8:128806778-129113499	s202	Ctrls	OK	17.7469	4.01622	-2.14366	-1.19591	0.00495	0.0301565
XLOC_039202	XLOC_039202	C6orf72	chr6:149887409-149912884	s202	Ctrls	OK	46.6708	10.5744	-2.14194	-3.43396	0.00025	0.00306111
XLOC_023235	XLOC_023235	ZNF100	chr19:21905567-21950330	s202	Ctrls	OK	5.24682	1.18913	-2.14153	-3.07349	0.0027	0.0193197
XLOC_047516	XLOC_047516	HSPA5	chr9:127997131-128003622	s202	Ctrls	OK	216.646	49.142	-2.14031	-2.98846	0.0008	0.00758608
XLOC_006203	XLOC_006203	KIF5B	chr10:32297937-32345359	s202	Ctrls	OK	60.4075	13.7304	-2.13735	-3.74473	0.0001	0.00146536
XLOC_001080	XLOC_001080	SLC35A3	chr1:100433938-100492535	s202	Ctrls	OK	19.0359	4.32994	-2.13631	-2.61948	0.00325	0.0223234
XLOC_043613	XLOC_043613	ADAM9	chr8:38854387-38962663	s202	Ctrls	OK	49.8507	11.3536	-2.13447	-3.05769	0.00105	0.00941355
XLOC_006139	XLOC_006139	ENKUR	chr10:25270907-25305085	s202	Ctrls	OK	12.5991	2.87221	-2.13309	-2.70528	0.0042	0.0267169
XLOC_010037	XLOC_010037	CLEC2D	chr12:9806278-9848823	s202	Ctrls	OK	36.9005	8.41509	-2.13259	-2.24766	0.00245	0.0179045
XLOC_021914	XLOC_021914	TMX3	chr18:66340924-66382535	s202	Ctrls	OK	66.6211	15.1957	-2.13231	-3.13283	0.0006	0.00610906
XLOC_021269	XLOC_021269	FDXR	chr17:72858619-72869156	s202	Ctrls	OK	23.0532	5.26059	-2.13167	-2.78088	0.002	0.015302
XLOC_011231	XLOC_011231	VWF	chr12:6058039-6233936	s202	Ctrls	OK	21.2696	4.87857	-2.12426	-2.54085	0.0009	0.00832395
XLOC_046762	XLOC_046762	C9orf82	chr9:26840682-26892802	s202	Ctrls	OK	16.9587	3.89448	-2.12252	-2.24364	0.00515	0.031127
XLOC_047339	XLOC_047339	ABCA1	chr9:107543282-107691173	s202	Ctrls	OK	25.0734	5.77473	-2.11833	-3.38458	0.0002	0.00256581
XLOC_030680	XLOC_030680	APPL1	chr3:57261764-57326710	s202	Ctrls	OK	51.3146	11.8204	-2.11809	-3.32907	0.00035	0.00400446
XLOC_019753	XLOC_019753	ALDH3A2	chr17:19551458-19580909	s202	Ctrls	OK	70.0534	16.1813	-2.11413	-3.40974	0.00015	0.00202358
XLOC_021512	XLOC_021512	RNF138	chr18:29671827-29711524	s202	Ctrls	OK	22.2429	5.1389	-2.11382	-3.41474	0.0011	0.00977368
XLOC_019834	XLOC_019834	TP53I13	chr17:27895738-27900172	s202	Ctrls	OK	29.406	6.79714	-2.11311	-2.60056	0.00195	0.0149656
XLOC_050554	XLOC_050554	PLP2	chrX:49028272-49042845	s202	Ctrls	OK	60.6331	14.0243	-2.11218	-3.40711	0.00485	0.0297294
XLOC_025220	XLOC_025220	CASP8	chr2:202098165-202152434	s202	Ctrls	OK	15.4808	3.58276	-2.11134	-2.06331	0.00065	0.00642408
XLOC_024957	XLOC_024957	TANC1	chr2:159825145-160089170	s202	Ctrls	OK	11.8729	2.75367	-2.10824	-2.8652	0.0028	0.0198425
XLOC_001542	XLOC_001542	SLC50A1	chr1:155107819-155111329	s202	Ctrls	OK	52.0943	12.086	-2.10779	-3.13155	0.0016	0.0129439
XLOC_020488	XLOC_020488	CXCL16	chr17:4634722-4643223	s202	Ctrls	OK	34.6778	8.04883	-2.10716	-2.97448	0.0033	0.0225888
XLOC_028918	XLOC_028918	AF165138.7.1,SAMSN1	chr21:15857548-16031142	s202	Ctrls	OK	9.40235	2.18438	-2.1058	-1.95522	0.0018	0.0141418
XLOC_002804	XLOC_002804	FUCA1	chr1:24171566-24194784	s202	Ctrls	OK	39.2498	9.1232	-2.10507	-3.38611	0.00035	0.00400446
XLOC_037099	XLOC_037099	MIER3	chr5:56195867-56267502	s202	Ctrls	OK	17.7464	4.13494	-2.10159	-2.25459	0.00145	0.0119789
XLOC_046188	XLOC_046188	EIF4BP3	chr9:98908306-98910141	s202	Ctrls	OK	24.805	5.7855	-2.10012	-3.20381	0.00355	0.023897
XLOC_005041	XLOC_005041	ARL5B	chr10:18948333-18970568	s202	Ctrls	OK	19.8807	4.64032	-2.09907	-3.76115	0.00015	0.00202358
XLOC_004080	XLOC_004080	PIGM	chr1:159997461-160001783	s202	Ctrls	OK	13.4791	3.14633	-2.09898	-3.42529	0.00085	0.00795026
XLOC_046210	XLOC_046210	ANP32B	chr9:100745637-100778225	s202	Ctrls	OK	71.3036	16.7202	-2.09238	-3.26068	0.0001	0.00146536
XLOC_037927	XLOC_037927	SH3PXD2B	chr5:171752184-171881527	s202	Ctrls	OK	52.606	12.3378	-2.09215	-2.97895	0.00115	0.0100961
XLOC_021254	XLOC_021254	SDK2	chr17:71330522-71640227	s202	Ctrls	OK	37.4452	8.78759	-2.09124	-3.18946	0.0003	0.00353406
XLOC_042926	XLOC_042926	FAM3C	chr7:120988904-121036418	s202	Ctrls	OK	80.8817	19.0043	-2.08949	-4.13377	0.00015	0.00202358
XLOC_050625	XLOC_050625	FAM156B	chrX:52920335-52937587	s202	Ctrls	OK	9.3936	2.21018	-2.08751	-2.74106	0.00195	0.0149656
XLOC_052230	XLOC_052230	HS6ST2	chrX:131760037-132095423	s202	Ctrls	OK	23.5429	5.54443	-2.08618	-2.90558	0.0015	0.0122848
XLOC_011051	XLOC_011051	ORAI1	chr12:122064454-122080583	s202	Ctrls	OK	10.3312	2.4354	-2.08477	-2.38142	0.009	0.0475591
XLOC_003032	XLOC_003032	MYCL1	chr1:40361097-40367928	s202	Ctrls	OK	19.8413	4.68487	-2.08243	-2.86189	0.00235	0.0172945
XLOC_043410	XLOC_043410	SLC7A2	chr8:17354596-17428082	s202	Ctrls	OK	8.38893	1.9809	-2.08233	-3.31684	0.00055	0.00572905
XLOC_032007	XLOC_032007	UBA7	chr3:49842639-49851379	s202	Ctrls	OK	55.7432	13.1632	-2.08228	-2.83645	0.00315	0.0217719
XLOC_040566	XLOC_040566	RSPH3	chr6:159397311-159421219	s202	Ctrls	OK	6.29717	1.48732	-2.08199	-2.36776	0.0094	0.0491892
XLOC_010632	XLOC_010632	YEATS4	chr12:69753482-69784576	s202	Ctrls	OK	26.0739	6.19686	-2.073	-2.63081	0.00455	0.0284161
XLOC_009543	XLOC_009543	MAML2	chr11:95709761-96076382	s202	Ctrls	OK	8.00128	1.90301	-2.07195	-3.37022	0.0008	0.00758608
XLOC_005918	XLOC_005918	DOCK1	chr10:128593977-129250781	s202	Ctrls	OK	23.8032	5.6632	-2.07147	-1.97505	0.00785	0.0430851
XLOC_020944	XLOC_020944	LEPREL4	chr17:39958198-39968855	s202	Ctrls	OK	26.4079	6.28593	-2.07077	-2.36912	0.00355	0.023897
XLOC_045122	XLOC_045122	C8orf37	chr8:96216683-96822364	s202	Ctrls	OK	8.67344	2.06562	-2.07003	-2.79576	0.00235	0.0172945
XLOC_041898	XLOC_041898	GIMAP8	chr7:150147717-150176480	s202	Ctrls	OK	5.42579	1.29232	-2.06987	-2.66442	0.00955	0.0498038
XLOC_021447	XLOC_021447	TUBB6	chr18:12308069-12326568	s202	Ctrls	OK	29.3784	7.00115	-2.06909	-2.72257	0.0012	0.0104065
XLOC_041357	XLOC_041357	GNG11	chr7:93551010-93555831	s202	Ctrls	OK	18.6502	4.44733	-2.06818	-3.05728	0.0095	0.0496081
XLOC_019273	XLOC_019273	NOB1	chr16:69775769-69788843	s202	Ctrls	OK	49.2675	11.7523	-2.06769	-2.76107	0.00125	0.010751
XLOC_021166	XLOC_021166	TUBD1	chr17:57936850-57970296	s202	Ctrls	OK	13.2695	3.16536	-2.06767	-2.59928	0.0057	0.0336934
XLOC_047176	XLOC_047176	C9orf64	chr9:86553225-86571901	s202	Ctrls	OK	17.3685	4.16253	-2.06094	-2.93652	0.0014	0.0116579
XLOC_002907	XLOC_002907	LAPTM5	chr1:31205315-31230667	s202	Ctrls	OK	131.201	31.4478	-2.06075	-3.23521	0.0009	0.00832395
XLOC_042701	XLOC_042701	SLC25A13	chr7:95749531-95951459	s202	Ctrls	OK	18.3278	4.39469	-2.0602	-2.79526	0.00075	0.00720819
XLOC_042705	XLOC_042705	AC092031.1,SHFM1	chr7:96110937-96339203	s202	Ctrls	OK	176.717	42.3858	-2.05979	-2.49449	0.0044	0.0277231
XLOC_001567	XLOC_001567	LMNA	chr1:156052363-156109880	s202	Ctrls	OK	112.196	26.9195	-2.0593	-2.17013	0.00105	0.00941355
XLOC_022564	XLOC_022564	VASP	chr19:46010687-46030236	s202	Ctrls	OK	30.8397	7.40294	-2.05862	-3.54516	0.00165	0.0132513
XLOC_038805	XLOC_038805	BCKDHB	chr6:80816363-81055987	s202	Ctrls	OK	30.954	7.43766	-2.0572	-2.66625	0.0032	0.0220562
XLOC_040008	XLOC_040008	ADH5P4	chr6:66546822-66547947	s202	Ctrls	OK	17.6416	4.24257	-2.05597	-2.63508	0.00895	0.0473452
XLOC_021768	XLOC_021768	SS18	chr18:23596218-23671164	s202	Ctrls	OK	42.6371	10.2589	-2.05524	-3.57931	0.00015	0.00202358
XLOC_042709	XLOC_042709	DLX5	chr7:96649703-96654409	s202	Ctrls	OK	52.2814	12.5813	-2.05501	-2.69271	0.0026	0.0187662		DLX5
XLOC_035289	XLOC_035289	NEK1	chr4:170314425-170533780	s202	Ctrls	OK	22.0606	5.3225	-2.05129	-3.30118	0.00055	0.00572905
XLOC_021524	XLOC_021524	GALNT1	chr18:33161002-33291798	s202	Ctrls	OK	48.7579	11.7659	-2.05102	-3.6888	0.0002	0.00256581
XLOC_014730	XLOC_014730	SALL2	chr14:21989231-22005350	s202	Ctrls	OK	88.9177	21.4624	-2.05066	-2.55526	0.0019	0.0147067
XLOC_020757	XLOC_020757	AC005412.1	chr17:27530440-27531492	s202	Ctrls	OK	34.2547	8.28992	-2.04687	-3.45398	0.0027	0.0193197
XLOC_039077	XLOC_039077	HEY2	chr6:125899712-126082415	s202	Ctrls	OK	7.87703	1.90674	-2.04654	-2.70957	0.0071	0.0397812
XLOC_004018	XLOC_004018	CRABP2	chr1:156669397-156675608	s202	Ctrls	OK	48.123	11.6515	-2.04622	-2.78183	0.0032	0.0220562
XLOC_043026	XLOC_043026	AC083862.1,C7orf49	chr7:134671258-134855547	s202	Ctrls	OK	23.0835	5.60523	-2.04202	-1.93543	0.0048	0.0294866
XLOC_003865	XLOC_003865	GOLPH3L	chr1:150618700-150669672	s202	Ctrls	OK	14.4669	3.51667	-2.04048	-2.67946	0.0019	0.0147067
XLOC_029139	XLOC_029139	ITGB2	chr21:46305867-46351904	s202	Ctrls	OK	45.154	10.9958	-2.0379	-1.91857	0.002	0.015302
XLOC_019840	XLOC_019840	NSRP1	chr17:28443798-28513493	s202	Ctrls	OK	18.5185	4.51943	-2.03476	-2.3447	0.0028	0.0198425
XLOC_001341	XLOC_001341	PDIA3P	chr1:146646929-146767443	s202	Ctrls	OK	195.678	47.8101	-2.03309	-2.51353	0.0065	0.0371309
XLOC_032369	XLOC_032369	LRRC58	chr3:120043355-120068186	s202	Ctrls	OK	15.6009	3.81254	-2.03281	-3.66205	0.0001	0.00146536
XLOC_023635	XLOC_023635	ZNF83	chr19:53115619-53193741	s202	Ctrls	OK	140.219	34.2937	-2.03166	-3.51555	0.00025	0.00306111
XLOC_022549	XLOC_022549	APOC1	chr19:45417920-45422606	s202	Ctrls	OK	110.65	27.1216	-2.02849	-4.35325	0.00675	0.0381969
XLOC_046688	XLOC_046688	ZDHHC21	chr9:14615529-14693469	s202	Ctrls	OK	14.9352	3.6654	-2.02667	-3.3577	0.0005	0.00529702
XLOC_050804	XLOC_050804	ATP7A	chrX:77166193-77305892	s202	Ctrls	OK	7.49846	1.84284	-2.02466	-2.72439	0.0023	0.017021
XLOC_016281	XLOC_016281	PML	chr15:74287013-74340153	s202	Ctrls	OK	53.5407	13.1673	-2.02368	-2.7295	0.0009	0.00832395
XLOC_003970	XLOC_003970	PYGO2,SHC1	chr1:154929501-154946871	s202	Ctrls	OK	207.633	51.1125	-2.02229	-3.01008	0.00095	0.00872149
XLOC_023392	XLOC_023392	SERTAD3	chr19:40946748-40950282	s202	Ctrls	OK	26.7621	6.59533	-2.02067	-3.01074	0.0023	0.017021
XLOC_051850	XLOC_051850	SLC7A3	chrX:70145431-70150975	s202	Ctrls	OK	16.9655	4.18543	-2.01915	-3.13012	0.0031	0.0214861
XLOC_047208	XLOC_047208	SHC3	chr9:91628059-91793682	s202	Ctrls	OK	29.4779	7.28203	-2.01722	-2.88094	0.0061	0.0354053
XLOC_002927	XLOC_002927	SPOCD1	chr1:32254730-32281652	s202	Ctrls	OK	12.4827	3.08671	-2.01579	-2.33828	0.00195	0.0149656
XLOC_001134	XLOC_001134	STXBP3	chr1:109289295-109352148	s202	Ctrls	OK	52.9673	13.1225	-2.01306	-3.22946	0.0004	0.00445852
XLOC_023639	XLOC_023639	ZNF468	chr19:53341785-53360902	s202	Ctrls	OK	13.0015	3.22219	-2.01257	-2.48518	0.00345	0.0233901
XLOC_040856	XLOC_040856	CREB5	chr7:28338939-28865511	s202	Ctrls	OK	21.7742	5.39997	-2.01159	-2.19452	0.0026	0.0187662
XLOC_033180	XLOC_033180	CD38	chr4:15779897-15851069	s202	Ctrls	OK	8.63153	2.14715	-2.00719	-2.40705	0.0063	0.0362697
XLOC_023075	XLOC_023075	TMED1	chr19:10943114-10946983	s202	Ctrls	OK	30.992	7.72536	-2.00422	-3.37017	0.0029	0.0203841
XLOC_026834	XLOC_026834	RBMS1	chr2:161128661-161350305	s202	Ctrls	OK	17.5171	4.37774	-2.0005	-2.91754	0.0003	0.00353406
XLOC_024709	XLOC_024709	INHBB	chr2:121103718-121109384	s202	Ctrls	OK	14.5627	3.63961	-2.00043	-3.32134	0.00325	0.0223234
XLOC_040092	XLOC_040092	FAM46A	chr6:82201155-82462491	s202	Ctrls	OK	10.2589	2.56515	-1.99976	-2.10127	0.0053	0.0318112
XLOC_003512	XLOC_003512	RP11-122C9.1.1	chr1:97144429-97145176	s202	Ctrls	OK	621.474	155.413	-1.99959	-4.14076	0.0005	0.00529702
XLOC_021397	XLOC_021397	ADCYAP1	chr18:904413-912173	s202	Ctrls	OK	35.1884	8.80009	-1.99951	-3.15959	0.0008	0.00758608
XLOC_005817	XLOC_005817	CASP7	chr10:115438941-115490662	s202	Ctrls	OK	18.2887	4.57916	-1.9978	-2.36593	0.0047	0.0290427
XLOC_042116	XLOC_042116	EEF1A1P6	chr7:22459062-22705152	s202	Ctrls	OK	241.715	60.5458	-1.99721	-3.59198	0.00045	0.00488975
XLOC_052023	XLOC_052023	ZMAT1	chrX:101137261-101187004	s202	Ctrls	OK	29.7927	7.46459	-1.99683	-3.08313	0.00175	0.0138365
XLOC_038315	XLOC_038315	ZNF192	chr6:28109715-28124089	s202	Ctrls	OK	20.7016	5.18769	-1.99658	-3.45409	0.0003	0.00353406
XLOC_025514	XLOC_025514	INPP5D	chr2:233924676-234116549	s202	Ctrls	OK	22.6368	5.67496	-1.99599	-1.97577	0.00235	0.0172945
XLOC_003609	XLOC_003609	LRIF1	chr1:111486088-111506701	s202	Ctrls	OK	18.464	4.63688	-1.99349	-2.78925	0.0029	0.0203841
XLOC_022487	XLOC_022487	AXL	chr19:41725107-41767670	s202	Ctrls	OK	19.8394	4.99332	-1.9903	-3.26751	0.00065	0.00642408
XLOC_050991	XLOC_050991	NXT2	chrX:108779009-108787919	s202	Ctrls	OK	9.81875	2.47597	-1.98754	-2.58111	0.0071	0.0397812
XLOC_020194	XLOC_020194	PPM1D	chr17:58677553-58742036	s202	Ctrls	OK	21.8066	5.51014	-1.9846	-3.08785	0.00145	0.0119789
XLOC_002795	XLOC_002795	ASAP3	chr1:23707553-23810750	s202	Ctrls	OK	31.1987	7.8957	-1.98235	-2.39181	0.0014	0.0116579
XLOC_032370	XLOC_032370	FSTL1	chr3:120111139-120170100	s202	Ctrls	OK	79.2576	20.0713	-1.98141	-2.36127	0.0034	0.0231221		FSTL1
XLOC_008259	XLOC_008259	IL10RA	chr11:117857062-117872196	s202	Ctrls	OK	19.1369	4.85593	-1.97854	-2.22945	0.0079	0.0433117
XLOC_043883	XLOC_043883	ZFHX4	chr8:77318888-77779521	s202	Ctrls	OK	4.91848	1.24902	-1.97742	-1.45587	0.0058	0.0340919
XLOC_009345	XLOC_009345	UCP2	chr11:73685711-73694352	s202	Ctrls	OK	37.2429	9.47509	-1.97475	-2.90484	0.0013	0.0110709
XLOC_019832	XLOC_019832	TAOK1	chr17:27717942-27871502	s202	Ctrls	OK	12.5403	3.19092	-1.97453	-3.063	0.0016	0.0129439
XLOC_016456	XLOC_016456	AEN	chr15:89164526-89175513	s202	Ctrls	OK	24.0642	6.12575	-1.97393	-2.9992	0.0001	0.00146536
XLOC_041451	XLOC_041451	RP11-395B7.7.1	chr7:100737327-100741248	s202	Ctrls	OK	11.2047	2.85965	-1.97019	-2.99461	0.00315	0.0217719
XLOC_025547	XLOC_025547	MLPH	chr2:238394070-238463961	s202	Ctrls	OK	2.88944	0.738424	-1.96827	-1.00087	0.00805	0.0438079
XLOC_014855	XLOC_014855	SNX6	chr14:35025979-35099389	s202	Ctrls	OK	57.141	14.6084	-1.96772	-3.11125	0.00075	0.00720819
XLOC_001093	XLOC_001093	VCAM1	chr1:101185304-101204601	s202	Ctrls	OK	21.7155	5.56104	-1.9653	-3.03417	0.0024	0.0175779
XLOC_019777	XLOC_019777	SCDP1	chr17:20687957-20689040	s202	Ctrls	OK	28.7464	7.3642	-1.96478	-3.29	0.00345	0.0233901
XLOC_016372	XLOC_016372	ZFAND6	chr15:80351909-80430735	s202	Ctrls	OK	103.652	26.5586	-1.9645	-3.3788	0.0002	0.00256581
XLOC_009147	XLOC_009147	ATL3	chr11:63391558-63439393	s202	Ctrls	OK	17.0299	4.36422	-1.96427	-3.46666	0.00025	0.00306111
XLOC_022890	XLOC_022890	PPAP2C	chr19:281047-291435	s202	Ctrls	OK	27.5719	7.07184	-1.96304	-2.6873	0.00465	0.0288054
XLOC_010621	XLOC_010621	NUP107	chr12:69068150-69136785	s202	Ctrls	OK	38.0327	9.75979	-1.96232	-2.19993	0.00455	0.0284161
XLOC_013281	XLOC_013281	LCP1	chr13:46700060-46786006	s202	Ctrls	OK	39.3459	10.0972	-1.96225	-2.35272	0.004	0.0258079
XLOC_025014	XLOC_025014	EIF2S2P4	chr2:171579718-171627276	s202	Ctrls	OK	47.556	12.2045	-1.96222	-3.0651	0.0013	0.0110709
XLOC_030104	XLOC_030104	RP1-199H16.5.1	chr22:38974124-39052634	s202	Ctrls	OK	5.17721	1.33104	-1.95962	-1.78511	0.00435	0.0274952
XLOC_045193	XLOC_045193	RRM2B	chr8:103216729-103251346	s202	Ctrls	OK	29.9966	7.71543	-1.95898	-2.58006	0.0025	0.0181631
XLOC_006963	XLOC_006963	ADAM8	chr10:135075906-135090372	s202	Ctrls	OK	11.0045	2.8335	-1.95743	-2.16398	0.00445	0.0279231
XLOC_042990	XLOC_042990	TMEM209	chr7:129804554-129847610	s202	Ctrls	OK	16.8654	4.3441	-1.95694	-2.25595	0.00815	0.0441588
XLOC_052113	XLOC_052113	LRCH2	chrX:114345184-114468635	s202	Ctrls	OK	25.5449	6.58129	-1.95659	-3.79474	0.00075	0.00720819
XLOC_014180	XLOC_014180	FUT8	chr14:65877309-66210839	s202	Ctrls	OK	109.229	28.1542	-1.95593	-2.81748	0.0009	0.00832395
XLOC_011604	XLOC_011604	SCAF11	chr12:46312913-46385903	s202	Ctrls	OK	39.0149	10.0924	-1.95075	-2.21959	0.009	0.0475591
XLOC_028938	XLOC_028938	BTG3	chr21:18965970-18985265	s202	Ctrls	OK	83.5271	21.6507	-1.94783	-3.25041	0.00045	0.00488975
XLOC_026141	XLOC_026141	FAM136A	chr2:70523106-70529222	s202	Ctrls	OK	59.1161	15.3375	-1.94649	-2.86502	0.0009	0.00832395
XLOC_014850	XLOC_014850	SPTSSA	chr14:34393436-34931980	s202	Ctrls	OK	30.1632	7.83714	-1.94439	-2.82751	0.007	0.0393874
XLOC_031286	XLOC_031286	MBNL1	chr3:151961616-152214602	s202	Ctrls	OK	30.8186	8.01018	-1.9439	-2.72135	0.00145	0.0119789
XLOC_026172	XLOC_026172	MOB1A	chr2:74382164-74406025	s202	Ctrls	OK	43.0963	11.2172	-1.94185	-2.52816	0.0063	0.0362697
XLOC_030474	XLOC_030474	CTDSPL	chr3:37903450-38025960	s202	Ctrls	OK	58.2448	15.1698	-1.94093	-3.37449	0.0002	0.00256581
XLOC_032865	XLOC_032865	KLHL6	chr3:183205318-183273477	s202	Ctrls	OK	2.59713	0.676898	-1.93991	-2.31839	0.0087	0.0463309
XLOC_002611	XLOC_002611	ENO1	chr1:8921060-8939953	s202	Ctrls	OK	862.222	225.046	-1.93784	-2.86403	0.00415	0.0265006
XLOC_012379	XLOC_012379	RILPL2	chr12:123899935-123921264	s202	Ctrls	OK	27.4996	7.1805	-1.93726	-3.1604	0.00595	0.0346865
XLOC_041640	XLOC_041640	SMO	chr7:128828712-128853386	s202	Ctrls	OK	27.9959	7.31345	-1.93659	-2.84733	0.0017	0.0135543
XLOC_001649	XLOC_001649	RP11-312J18.5.1	chr1:160864769-160865866	s202	Ctrls	OK	102.221	26.719	-1.93575	-3.79898	0.0009	0.00832395
XLOC_050710	XLOC_050710	RP13-178D16.2.1	chrX:68003314-68004909	s202	Ctrls	OK	29.3167	7.68082	-1.93239	-3.06776	0.0056	0.0332505
XLOC_022319	XLOC_022319	ZNF254	chr19:24216275-24312643	s202	Ctrls	OK	15.4332	4.04352	-1.93236	-2.4891	0.00575	0.0338781
XLOC_011077	XLOC_011077	TMED2	chr12:124066766-124083116	s202	Ctrls	OK	148.913	39.0315	-1.93176	-3.45729	0.0005	0.00529702
XLOC_051060	XLOC_051060	SLC25A43	chrX:118533022-118588441	s202	Ctrls	OK	16.0513	4.21225	-1.93002	-2.51546	0.0038	0.0249795
XLOC_045485	XLOC_045485	DOCK8	chr9:213107-465259	s202	Ctrls	OK	9.9392	2.60842	-1.92995	-1.84982	0.00205	0.0156185
XLOC_001741	XLOC_001741	RCSD1	chr1:167596621-167675486	s202	Ctrls	OK	8.72043	2.29283	-1.92727	-2.44005	0.00295	0.0206552
XLOC_040874	XLOC_040874	ZNRF2	chr7:30323922-30452118	s202	Ctrls	OK	21.166	5.56853	-1.92638	-2.48949	0.00945	0.0494118
XLOC_014245	XLOC_014245	DNAL1	chr14:74111577-74167054	s202	Ctrls	OK	19.094	5.02366	-1.92631	-2.23766	0.00805	0.043808
XLOC_013483	XLOC_013483	ABCC4	chr13:95672082-95953687	s202	Ctrls	OK	6.45889	1.70309	-1.92313	-2.38348	0.00205	0.0156185
XLOC_009967	XLOC_009967	CD4	chr12:6896023-6929974	s202	Ctrls	OK	23.9102	6.31381	-1.92104	-2.13671	0.0033	0.0225888
XLOC_038703	XLOC_038703	KIAA1586	chr6:56911346-56920023	s202	Ctrls	OK	9.90509	2.61588	-1.92087	-2.6853	0.0052	0.0313529
XLOC_023515	XLOC_023515	SLC1A5	chr19:47278139-47291851	s202	Ctrls	OK	21.4335	5.66172	-1.92056	-2.68142	0.0031	0.0214861
XLOC_043462	XLOC_043462	AC037459.4.1,C8orf58,PDLIM2	chr8:22435791-22461663	s202	Ctrls	OK	77.6932	20.5589	-1.91803	-2.42034	0.00105	0.00941355
XLOC_046693	XLOC_046693	TTC39B	chr9:15170842-15307358	s202	Ctrls	OK	3.43418	0.909939	-1.91612	-1.9338	0.007	0.0393874
XLOC_046512	XLOC_046512	EEF1A1P5	chr9:135894815-135896553	s202	Ctrls	OK	1422.97	377.078	-1.91597	-2.45653	0.00805	0.0438079
XLOC_002045	XLOC_002045	SNRPE	chr1:203830730-203839678	s202	Ctrls	OK	36.5802	9.69375	-1.91594	-2.87565	0.00595	0.0346865
XLOC_013108	XLOC_013108	IPO7P2	chr13:24696203-24697953	s202	Ctrls	OK	15.1687	4.02116	-1.91541	-2.94807	0.00635	0.0364625
XLOC_031039	XLOC_031039	PDIA5,SEC22A	chr3:122785908-122992977	s202	Ctrls	OK	53.182	14.1004	-1.9152	-2.65989	0.0023	0.017021
XLOC_032680	XLOC_032680	SLC33A1	chr3:155544304-155572218	s202	Ctrls	OK	34.461	9.14533	-1.91386	-2.88438	0.00185	0.014432
XLOC_035382	XLOC_035382	IRF2	chr4:185308866-185395734	s202	Ctrls	OK	26.954	7.15799	-1.91287	-2.8624	0.0005	0.00529702
XLOC_030056	XLOC_030056	MYH9	chr22:36677322-36784063	s202	Ctrls	OK	98.1924	26.1012	-1.9115	-2.4868	0.0024	0.0175779
XLOC_014064	XLOC_014064	STYX	chr14:53196897-53241716	s202	Ctrls	OK	9.8956	2.63093	-1.91122	-3.01514	0.0027	0.0193197
XLOC_022232	XLOC_022232	NWD1	chr19:16830786-16928774	s202	Ctrls	OK	5.69382	1.51419	-1.91085	-2.61194	0.00475	0.0292426
XLOC_008117	XLOC_008117	JRKL	chr11:96123152-96240738	s202	Ctrls	OK	13.0366	3.4716	-1.90889	-2.84926	0.0032	0.0220562
XLOC_006074	XLOC_006074	FAM107B	chr10:14560555-14816896	s202	Ctrls	OK	82.5735	21.9996	-1.9082	-2.88032	0.0006	0.00610906
XLOC_014146	XLOC_014146	PRKCH,RP11-47I22.3.1,RP11-47I22.4.1	chr14:61654276-62125414	s202	Ctrls	OK	14.7123	3.92084	-1.90779	-1.25381	0.0015	0.0122848
XLOC_023970	XLOC_023970	WDR43	chr2:29117508-29171088	s202	Ctrls	OK	21.7663	5.80509	-1.90671	-2.55507	0.0048	0.0294866
XLOC_032258	XLOC_032258	SENP7	chr3:101043048-101232085	s202	Ctrls	OK	44.2965	11.8147	-1.9066	-3.08808	0.0016	0.0129439
XLOC_045309	XLOC_045309	ATAD2	chr8:124332089-124428590	s202	Ctrls	OK	8.68861	2.32625	-1.90112	-2.55662	0.0025	0.0181631
XLOC_025275	XLOC_025275	PARD3B	chr2:205410515-206484886	s202	Ctrls	OK	5.1574	1.38187	-1.90002	-1.90561	0.0037	0.0244352
XLOC_020951	XLOC_020951	DHX58	chr17:40253421-40264751	s202	Ctrls	OK	10.4051	2.79362	-1.89709	-2.30199	0.0074	0.0411836
XLOC_016995	XLOC_016995	NEDD4	chr15:56119119-56285944	s202	Ctrls	OK	3.05447	0.821408	-1.89475	-1.35433	0.0065	0.0371309
XLOC_018689	XLOC_018689	RSL1D1	chr16:11931195-11945442	s202	Ctrls	OK	65.6867	17.6938	-1.89236	-3.23502	0.0005	0.00529702
XLOC_023535	XLOC_023535	CARD8	chr19:48706402-48759203	s202	Ctrls	OK	36.371	9.8048	-1.89123	-1.89575	0.0085	0.0455832
XLOC_025690	XLOC_025690	PDIA6	chr2:10861774-10978103	s202	Ctrls	OK	153.451	41.4126	-1.88964	-3.31984	0.0007	0.00682663
XLOC_033550	XLOC_033550	USO1	chr4:76649761-76735382	s202	Ctrls	OK	43.2514	11.6757	-1.88924	-3.30645	0.0005	0.00529702
XLOC_044571	XLOC_044571	TNFRSF10D	chr8:22993100-23021543	s202	Ctrls	OK	13.2663	3.58234	-1.88879	-2.96959	0.00335	0.0228759
XLOC_030708	XLOC_030708	SYNPR	chr3:63213990-63602597	s202	Ctrls	OK	185.422	50.2098	-1.88477	-2.73448	0.0013	0.0110709
XLOC_016352	XLOC_016352	IREB2	chr15:78729772-78793798	s202	Ctrls	OK	42.8011	11.5915	-1.88458	-2.65205	0.00225	0.0168074
XLOC_035036	XLOC_035036	PGRMC2	chr4:129190391-129209984	s202	Ctrls	OK	52.3047	14.1833	-1.88275	-3.04027	0.00085	0.00795026
XLOC_007350	XLOC_007350	HIPK3	chr11:33278217-33378569	s202	Ctrls	OK	31.0954	8.43623	-1.88203	-2.96622	0.00045	0.00488975
XLOC_020019	XLOC_020019	G6PC3	chr17:42148097-42153711	s202	Ctrls	OK	67.3267	18.2691	-1.88177	-3.62229	0.0007	0.00682663
XLOC_020342	XLOC_020342	2013-09-09	chr17:75277491-75496674	s202	Ctrls	OK	118.284	32.1275	-1.88037	-2.90363	0.0006	0.00610906
XLOC_006138	XLOC_006138	PRTFDC1	chr10:25137553-25241533	s202	Ctrls	OK	46.6787	12.6796	-1.88025	-2.70913	0.00375	0.0246998
XLOC_035735	XLOC_035735	SNX18	chr5:53813588-53842415	s202	Ctrls	OK	14.7819	4.01934	-1.8788	-3.00454	0.001	0.00907991
XLOC_022170	XLOC_022170	CALR	chr19:13049413-13055304	s202	Ctrls	OK	391.173	106.41	-1.87818	-2.951	0.0014	0.0116579
XLOC_040228	XLOC_040228	SEC63	chr6:108188959-108279482	s202	Ctrls	OK	64.0493	17.4244	-1.87808	-2.66213	0.0037	0.0244352
XLOC_004866	XLOC_004866	RP11-488L18.4.1	chr1:247353152-247372795	s202	Ctrls	OK	23.9455	6.53195	-1.87417	-2.71355	0.00475	0.0292426
XLOC_010876	XLOC_010876	KIAA1033	chr12:105501101-105562912	s202	Ctrls	OK	33.128	9.04253	-1.87325	-2.32283	0.00435	0.0274952
XLOC_020402	XLOC_020402	SLC16A3	chr17:80186292-80197369	s202	Ctrls	OK	37.8175	10.3373	-1.87119	-2.66612	0.00375	0.0246998
XLOC_015270	XLOC_015270	GTF2A1	chr14:81641795-81687721	s202	Ctrls	OK	28.4713	7.78722	-1.87033	-2.90066	0.0026	0.0187662
XLOC_014990	XLOC_014990	ERO1L	chr14:53106633-53162618	s202	Ctrls	OK	48.213	13.2191	-1.8668	-2.52033	0.00385	0.025142
XLOC_006122	XLOC_006122	C10orf114	chr10:21781586-21786191	s202	Ctrls	OK	11.1431	3.06091	-1.86411	-2.75715	0.00265	0.0190511
XLOC_011430	XLOC_011430	RECQL	chr12:21590548-21654603	s202	Ctrls	OK	17.7627	4.89348	-1.85991	-2.68857	0.00155	0.0126215
XLOC_044175	XLOC_044175	FAM91A1	chr8:124780695-124827692	s202	Ctrls	OK	34.3647	9.47553	-1.85865	-2.56382	0.0051	0.0308905
XLOC_013420	XLOC_013420	EDNRB	chr13:78469615-78493903	s202	Ctrls	OK	34.2731	9.46504	-1.85639	-3.22348	0.00055	0.00572905
XLOC_022206	XLOC_022206	SYDE1	chr19:15218213-15225789	s202	Ctrls	OK	9.50146	2.62659	-1.85496	-2.87734	0.0084	0.0451687
XLOC_044142	XLOC_044142	NOV	chr8:120428545-120474590	s202	Ctrls	OK	64.9369	17.9802	-1.85263	-2.55828	0.00365	0.0243803		NOV
XLOC_006407	XLOC_006407	IPMK	chr10:59951277-60027694	s202	Ctrls	OK	7.77502	2.15362	-1.85208	-3.03761	0.002	0.015302
XLOC_001797	XLOC_001797	C1orf9	chr1:172501488-172580971	s202	Ctrls	OK	26.3444	7.29772	-1.85198	-2.98261	0.0017	0.0135543
XLOC_008736	XLOC_008736	UEVLD	chr11:18552747-18610294	s202	Ctrls	OK	12.7504	3.53467	-1.85089	-2.24459	0.00585	0.0342542
XLOC_045477	XLOC_045477	RPL8	chr8:146015149-146017972	s202	Ctrls	OK	1344.79	373.545	-1.84803	-2.55607	0.00425	0.0269573
XLOC_029480	XLOC_029480	ZNRF3	chr22:29279579-29453475	s202	Ctrls	OK	22.1169	6.14417	-1.84786	-3.21623	0.0008	0.00758608
XLOC_003527	XLOC_003527	DBT	chr1:100659633-100715390	s202	Ctrls	OK	11.9643	3.32459	-1.84749	-2.88993	0.00465	0.0288054
XLOC_021325	XLOC_021325	SOCS3	chr17:76352863-76356158	s202	Ctrls	OK	50.5506	14.1356	-1.8384	-3.34069	0.0013	0.0110709
XLOC_022576	XLOC_022576	HIF3A	chr19:46800302-46846690	s202	Ctrls	OK	67.5092	18.8839	-1.83793	-2.20645	0.00525	0.0315778
XLOC_007944	XLOC_007944	RPS3	chr11:75110529-75133324	s202	Ctrls	OK	925.592	259.577	-1.83421	-2.18234	0.0089	0.0471183
XLOC_023194	XLOC_023194	KIAA1683	chr19:18367908-18385319	s202	Ctrls	OK	5.49115	1.54069	-1.83353	-2.30815	0.00735	0.0409512
XLOC_040526	XLOC_040526	RP11-475C16.1.1	chr6:153552454-153668623	s202	Ctrls	OK	1154.83	324.019	-1.83353	-2.84463	0.001	0.00907991
XLOC_046315	XLOC_046315	ZNF618	chr9:116638561-116818871	s202	Ctrls	OK	11.4602	3.21547	-1.83353	-2.92757	0.00085	0.00795026
XLOC_050266	XLOC_050266	TBL1X	chrX:9431334-9687780	s202	Ctrls	OK	17.092	4.80107	-1.83189	-2.20716	0.00495	0.0301565
XLOC_021467	XLOC_021467	MIB1	chr18:19321280-19450918	s202	Ctrls	OK	19.2046	5.40611	-1.82879	-3.39861	0.0004	0.00445852
XLOC_013221	XLOC_013221	LHFP	chr13:39917028-40177665	s202	Ctrls	OK	80.8681	22.7705	-1.82841	-3.11382	0.001	0.00907991
XLOC_007205	XLOC_007205	TEAD1	chr11:12695968-12966298	s202	Ctrls	OK	22.6714	6.38554	-1.82799	-3.00757	0.0011	0.00977368
XLOC_021882	XLOC_021882	ATP8B1	chr18:55313657-55470327	s202	Ctrls	OK	7.08653	1.99855	-1.82612	-2.83044	0.003	0.0209389
XLOC_021378	XLOC_021378	FASN	chr17:80036214-80056106	s202	Ctrls	OK	154.444	43.5784	-1.8254	-2.33973	0.0051	0.0308905
XLOC_001684	XLOC_001684	UHMK1	chr1:162467040-162499419	s202	Ctrls	OK	26.2297	7.4105	-1.82356	-3.31441	0.0009	0.00832395
XLOC_042698	XLOC_042698	PON2	chr7:95034174-95064510	s202	Ctrls	OK	312.5	88.3559	-1.82246	-2.64989	0.0022	0.0165208
XLOC_021198	XLOC_021198	CCDC47	chr17:61822610-61851088	s202	Ctrls	OK	64.2622	18.1717	-1.82228	-3.2134	0.0002	0.00256581
XLOC_027304	XLOC_027304	WDFY1	chr2:224720432-224810104	s202	Ctrls	OK	33.2779	9.42912	-1.81937	-2.60417	0.0028	0.0198425
XLOC_035825	XLOC_035825	SLC30A5	chr5:68389472-68432221	s202	Ctrls	OK	46.8615	13.2856	-1.81854	-2.62923	0.00385	0.025142
XLOC_006876	XLOC_006876	PRDX3	chr10:120927214-120938345	s202	Ctrls	OK	191.539	54.3298	-1.81782	-3.18117	0.0006	0.00610906
XLOC_022444	XLOC_022444	PAK4	chr19:39616419-39670046	s202	Ctrls	OK	21.4245	6.07948	-1.81724	-2.50007	0.0026	0.0187662
XLOC_032057	XLOC_032057	RFT1	chr3:53122498-53164478	s202	Ctrls	OK	18.6844	5.3023	-1.81715	-2.54264	0.00415	0.0265006
XLOC_041615	XLOC_041615	HILPDA,METTL2B	chr7:128095893-128146656	s202	Ctrls	OK	150.207	42.6596	-1.81601	-3.09672	0.00375	0.0246998
XLOC_025734	XLOC_025734	LAPTM4A	chr2:20232410-20251789	s202	Ctrls	OK	286.752	81.5402	-1.81422	-3.02933	0.00105	0.00941355
XLOC_000231	XLOC_000231	C1orf144	chr1:16679069-16763919	s202	Ctrls	OK	47.3118	13.4577	-1.81376	-2.41569	0.00355	0.023897
XLOC_025732	XLOC_025732	WDR35	chr2:20110020-20189892	s202	Ctrls	OK	16.0689	4.57085	-1.81374	-2.39822	0.0074	0.0411836
XLOC_036301	XLOC_036301	SMAD5	chr5:135465195-135524435	s202	Ctrls	OK	22.1718	6.31302	-1.81232	-2.17214	0.00675	0.0381969		SMAD5
XLOC_037277	XLOC_037277	SERINC5	chr5:79407049-79551898	s202	Ctrls	OK	48.4417	13.7957	-1.81203	-2.94385	0.00165	0.0132513
XLOC_003424	XLOC_003424	CCBL2,RBMXL1	chr1:89401455-89458643	s202	Ctrls	OK	71.8901	20.4745	-1.81196	-2.91488	0.0015	0.0122848
XLOC_025492	XLOC_025492	PTMA	chr2:232571604-232578251	s202	Ctrls	OK	537.047	153.037	-1.81117	-2.63627	0.0025	0.0181631
XLOC_019814	XLOC_019814	RPS7P1	chr17:26794813-26795460	s202	Ctrls	OK	495.152	141.459	-1.80749	-2.99538	0.001	0.00907991
XLOC_044009	XLOC_044009	LAPTM4B	chr8:98787284-98865241	s202	Ctrls	OK	100.082	28.6005	-1.80707	-2.69009	0.0024	0.0175779
XLOC_011907	XLOC_011907	GNS	chr12:65107224-65153227	s202	Ctrls	OK	51.6117	14.7504	-1.80695	-3.17136	0.0005	0.00529702
XLOC_011574	XLOC_011574	GXYLT1	chr12:42475646-42538681	s202	Ctrls	OK	8.18609	2.34008	-1.80662	-2.98596	0.00175	0.0138365
XLOC_030605	XLOC_030605	DAG1	chr3:49506145-49573048	s202	Ctrls	OK	78.0334	22.3121	-1.80626	-2.24841	0.0047	0.0290427
XLOC_039937	XLOC_039937	MCM3	chr6:52128806-52149582	s202	Ctrls	OK	23.5648	6.74029	-1.80575	-2.82335	0.00105	0.00941355
XLOC_012872	XLOC_012872	PTMAP5	chr13:82264202-82264535	s202	Ctrls	OK	263.136	75.3366	-1.80439	-5.55125	0.00465	0.0288054
XLOC_009234	XLOC_009234	CLCF1,POLD4	chr11:67118247-67141648	s202	Ctrls	OK	58.5523	16.7664	-1.80415	-2.38628	0.0032	0.0220562
XLOC_025039	XLOC_025039	CDCA7	chr2:174202946-174233725	s202	Ctrls	OK	21.0381	6.02746	-1.80338	-2.70591	0.00405	0.0260713
XLOC_029948	XLOC_029948	CTA-445C9.15.1	chr22:26917948-26921002	s202	Ctrls	OK	10.6645	3.05559	-1.80329	-2.71605	0.00555	0.0330227
XLOC_005476	XLOC_005476	PLAU	chr10:75668934-75682535	s202	Ctrls	OK	10.4681	3.00119	-1.80239	-1.9725	0.00785	0.0430851
XLOC_021737	XLOC_021737	ROCK1	chr18:18529700-18691812	s202	Ctrls	OK	14.9472	4.2854	-1.80237	-3.03753	0.0013	0.0110709
XLOC_019802	XLOC_019802	LGALS9	chr17:25956823-25976586	s202	Ctrls	OK	23.4493	6.75009	-1.79657	-2.44841	0.00705	0.0395903
XLOC_033624	XLOC_033624	NUDT9	chr4:88343733-88380606	s202	Ctrls	OK	70.3403	20.2522	-1.79627	-2.55028	0.00195	0.0149656
XLOC_021253	XLOC_021253	CDC42EP4	chr17:71279763-71308143	s202	Ctrls	OK	147.171	42.3916	-1.79564	-2.91809	0.001	0.00907991
XLOC_020183	XLOC_020183	DHX40	chr17:57642885-57685712	s202	Ctrls	OK	48.8629	14.089	-1.79418	-3.23205	0.00065	0.00642408
XLOC_008292	XLOC_008292	NLRX1	chr11:119037276-119054725	s202	Ctrls	OK	10.2791	2.96738	-1.79245	-2.22131	0.0024	0.0175779
XLOC_034818	XLOC_034818	TMSL3	chr4:91048685-92523064	s202	Ctrls	OK	619.447	178.926	-1.79162	-2.73375	0.00325	0.0223234
XLOC_006712	XLOC_006712	PIK3AP1	chr10:98353068-98480271	s202	Ctrls	OK	11.7405	3.39363	-1.7906	-2.07757	0.0077	0.0424493
XLOC_033638	XLOC_033638	HERC5	chr4:89378267-89427314	s202	Ctrls	OK	9.8011	2.83451	-1.78984	-2.49476	0.0057	0.0336934
XLOC_009151	XLOC_009151	RCOR2	chr11:63678692-63684316	s202	Ctrls	OK	30.1178	8.71285	-1.7894	-2.1921	0.0047	0.0290427
XLOC_007257	XLOC_007257	LDHA	chr11:18415934-18429972	s202	Ctrls	OK	479.616	138.77	-1.78918	-2.81543	0.0019	0.0147067
XLOC_021953	XLOC_021953	PTBP1	chr19:797391-812327	s202	Ctrls	OK	79.765	23.0967	-1.78807	-2.94256	0.0005	0.00529702
XLOC_036689	XLOC_036689	ZNF354C	chr5:178487415-178510538	s202	Ctrls	OK	13.355	3.86774	-1.78782	-2.8612	0.0045	0.0281835
XLOC_029595	XLOC_029595	LGALS1	chr22:38071614-38075813	s202	Ctrls	OK	238.653	69.1986	-1.7861	-2.93681	0.00135	0.0113749
XLOC_051936	XLOC_051936	BRWD3	chrX:79926352-80065187	s202	Ctrls	OK	11.2697	3.27165	-1.78436	-2.53968	0.0054	0.032275
XLOC_006950	XLOC_006950	BNIP3	chr10:133781577-133795435	s202	Ctrls	OK	86.1903	25.0814	-1.78091	-2.97818	0.00135	0.0113749
XLOC_042549	XLOC_042549	TBL2	chr7:72983989-72993121	s202	Ctrls	OK	26.7766	7.80356	-1.77877	-2.31195	0.00135	0.0113749
XLOC_007633	XLOC_007633	MS4A14,MS4A6E,MS4A7	chr11:60102303-60185161	s202	Ctrls	OK	23.0851	6.73358	-1.77751	-1.67892	0.00875	0.0465348
XLOC_023183	XLOC_023183	BST2	chr19:17502081-17516457	s202	Ctrls	OK	95.6248	27.9074	-1.77674	-2.60701	0.0025	0.0181631
XLOC_037397	XLOC_037397	LIX1	chr5:96424778-96772921	s202	Ctrls	OK	16.0344	4.67973	-1.77667	-2.37914	0.009	0.0475591
XLOC_032127	XLOC_032127	LRIG1	chr3:66119284-66551687	s202	Ctrls	OK	138.303	40.5297	-1.77078	-2.55011	0.0034	0.0231221
XLOC_003414	XLOC_003414	RP4-604K5.1.1	chr1:87328131-87380107	s202	Ctrls	OK	160.117	46.971	-1.76929	-3.01393	0.00175	0.0138365
XLOC_047177	XLOC_047177	HNRNPK	chr9:86582997-86595569	s202	Ctrls	OK	381.373	112.295	-1.76391	-2.96114	0.0041	0.0262741
XLOC_012949	XLOC_012949	ZIC2	chr13:100634025-100639018	s202	Ctrls	OK	69.8772	20.5963	-1.76244	-2.56615	0.0029	0.0203841
XLOC_018702	XLOC_018702	CPPED1	chr16:12756918-12897874	s202	Ctrls	OK	9.17071	2.70331	-1.76231	-2.36676	0.0091	0.0480238
XLOC_036181	XLOC_036181	SNCAIP	chr5:121647048-121814782	s202	Ctrls	OK	33.9345	10.0075	-1.76166	-1.91663	0.0072	0.0402508
XLOC_030267	XLOC_030267	BHLHE40	chr3:4938492-5027008	s202	Ctrls	OK	71.1046	20.9755	-1.76124	-2.47236	0.0043	0.0272311
XLOC_007453	XLOC_007453	DDB2	chr11:47236492-47260767	s202	Ctrls	OK	31.3374	9.24556	-1.76105	-2.72169	0.00675	0.0381969
XLOC_040074	XLOC_040074	PHIP	chr6:79650262-79787953	s202	Ctrls	OK	10.9674	3.23584	-1.76101	-2.35369	0.0075	0.0416585
XLOC_026697	XLOC_026697	DARS	chr2:136664246-136774099	s202	Ctrls	OK	104.473	30.8611	-1.75927	-2.65904	0.002	0.015302
XLOC_030448	XLOC_030448	CRTAP	chr3:33155470-33185153	s202	Ctrls	OK	59.1471	17.4802	-1.75858	-3.07726	0.0006	0.00610906
XLOC_038722	XLOC_038722	PHF3	chr6:64345724-66417118	s202	Ctrls	OK	26.8488	7.94043	-1.75757	-2.35528	0.0049	0.0299252
XLOC_010376	XLOC_010376	METTL7A	chr12:51317254-51326300	s202	Ctrls	OK	75.3739	22.2952	-1.75733	-2.84837	0.00065	0.00642408
XLOC_022165	XLOC_022165	JUNB	chr19:12902309-12904124	s202	Ctrls	OK	106.85	31.6221	-1.75658	-3.62616	0.0016	0.0129439
XLOC_036092	XLOC_036092	C5orf30	chr5:102594402-102614361	s202	Ctrls	OK	43.5938	12.9238	-1.75409	-3.19334	0.001	0.00907991
XLOC_046612	XLOC_046612	CBWD1	chr9:121040-188979	s202	Ctrls	OK	36.1215	10.7262	-1.75172	-2.07048	0.0085	0.0455832
XLOC_025631	XLOC_025631	ADI1	chr2:3501692-3526968	s202	Ctrls	OK	60.384	17.9356	-1.75134	-2.97657	0.00145	0.0119789
XLOC_001851	XLOC_001851	SOAT1	chr1:179262924-179327815	s202	Ctrls	OK	24.6748	7.32916	-1.75132	-2.53697	0.0051	0.0308905
XLOC_001098	XLOC_001098	S1PR1	chr1:101702443-101707074	s202	Ctrls	OK	81.7855	24.313	-1.75012	-2.90354	0.00165	0.0132513
XLOC_039299	XLOC_039299	IGF2R	chr6:160390130-160534539	s202	Ctrls	OK	26.4383	7.88084	-1.74621	-2.28597	0.0046	0.0286474
XLOC_009238	XLOC_009238	CORO1B,PTPRCAP	chr11:67202980-67211292	s202	Ctrls	OK	66.2586	19.7531	-1.74603	-2.48388	0.0039	0.0253436
XLOC_008491	XLOC_008491	CTSD,IFITM10,RP11-295K3.1.1	chr11:1753639-1785222	s202	Ctrls	OK	196.051	58.5029	-1.74465	-2.73379	0.0014	0.0116579
XLOC_036583	XLOC_036583	NPM1	chr5:170814119-170838141	s202	Ctrls	OK	640.486	191.419	-1.74244	-3.58493	0.0032	0.0220562
XLOC_036417	XLOC_036417	POU4F3,RBM27	chr5:145583112-145756526	s202	Ctrls	OK	11.999	3.5868	-1.74214	-2.77354	0.0024	0.0175779
XLOC_007173	XLOC_007173	IPO7	chr11:9406168-9469673	s202	Ctrls	OK	65.6133	19.6188	-1.74175	-3.12722	0.00215	0.0162065
XLOC_033698	XLOC_033698	CISD2	chr4:103790134-103940896	s202	Ctrls	OK	31.4622	9.42368	-1.73926	-2.96444	0.00215	0.0162065
XLOC_036503	XLOC_036503	THG1L	chr5:157158204-157168456	s202	Ctrls	OK	11.1747	3.34738	-1.73913	-2.13758	0.0092	0.048423
XLOC_012646	XLOC_012646	NHLRC3	chr13:39612442-39625205	s202	Ctrls	OK	45.3762	13.6043	-1.73787	-2.64937	0.0047	0.0290427
XLOC_044689	XLOC_044689	RAB11FIP1	chr8:37716135-37756985	s202	Ctrls	OK	4.78132	1.43462	-1.73675	-2.14148	0.0077	0.0424493
XLOC_032378	XLOC_032378	HCLS1	chr3:121350245-121379774	s202	Ctrls	OK	39.5931	11.8871	-1.73585	-2.38256	0.0037	0.0244352
XLOC_019862	XLOC_019862	RHBDL3	chr17:30593194-30651680	s202	Ctrls	OK	17.6485	5.29909	-1.73572	-2.58371	0.00445	0.0279231
XLOC_011997	XLOC_011997	PHLDA1	chr12:76419226-76427712	s202	Ctrls	OK	37.3241	11.2231	-1.73364	-2.55612	0.00395	0.0255766
XLOC_043007	XLOC_043007	AC093106.7.1	chr7:131346710-131347383	s202	Ctrls	OK	74.7925	22.5024	-1.73282	-3.26524	0.00715	0.0400163
XLOC_032075	XLOC_032075	WNT5A	chr3:55499742-55523973	s202	Ctrls	OK	5.18675	1.56055	-1.73278	-2.18513	0.00345	0.0233901		WNT5A
XLOC_044455	XLOC_044455	CTD-2135J3.4.1,PINX1,SOX7	chr8:10581277-10697394	s202	Ctrls	OK	21.8973	6.59394	-1.73154	-2.17976	0.0078	0.0428817
XLOC_009564	XLOC_009564	TMEM123	chr11:102267062-102369532	s202	Ctrls	OK	51.391	15.5051	-1.72877	-2.686	0.00385	0.025142
XLOC_033660	XLOC_033660	PDLIM5	chr4:95373036-95589377	s202	Ctrls	OK	25.0016	7.55938	-1.72568	-1.78876	0.0088	0.0467258
XLOC_003861	XLOC_003861	MCL1	chr1:150547031-150552073	s202	Ctrls	OK	201.106	60.8124	-1.72552	-2.78668	0.00215	0.0162065
XLOC_040455	XLOC_040455	PLAGL1	chr6:144261436-144385735	s202	Ctrls	OK	76.7181	23.224	-1.72395	-2.46121	0.00555	0.0330227
XLOC_030159	XLOC_030159	NAGA	chr22:42394728-42466846	s202	Ctrls	OK	19.7383	5.9784	-1.72317	-2.58687	0.00415	0.0265006
XLOC_030116	XLOC_030116	RPL3	chr22:39708886-39716394	s202	Ctrls	OK	921.731	280.1	-1.7184	-2.14437	0.00825	0.0445791
XLOC_021083	XLOC_021083	AC004797.1.1	chr17:47500969-47502298	s202	Ctrls	OK	45.8539	13.9344	-1.71839	-3.13489	0.0039	0.0253436
XLOC_022637	XLOC_022637	FCGRT	chr19:50015535-50029685	s202	Ctrls	OK	61.0253	18.5519	-1.71784	-2.77549	0.00145	0.0119789
XLOC_032674	XLOC_032674	PLCH1	chr3:155093368-155462856	s202	Ctrls	OK	17.9205	5.44924	-1.71748	-2.44591	0.00165	0.0132513
XLOC_039461	XLOC_039461	CCDC90A	chr6:13791019-13814800	s202	Ctrls	OK	27.0559	8.23566	-1.71599	-2.18069	0.0087	0.0463309
XLOC_029204	XLOC_029204	BCL2L13	chr22:18111620-18213388	s202	Ctrls	OK	41.8278	12.7337	-1.71581	-2.75902	0.00095	0.00872149
XLOC_000935	XLOC_000935	IFI44L	chr1:79085606-79108484	s202	Ctrls	OK	43.6674	13.3046	-1.71463	-2.71798	0.00265	0.0190511
XLOC_027690	XLOC_027690	POFUT1	chr20:30795682-30826470	s202	Ctrls	OK	20.8354	6.34974	-1.71427	-2.05211	0.00395	0.0255766
XLOC_005144	XLOC_005144	ZEB1	chr10:31596657-31821599	s202	Ctrls	OK	26.3622	8.03927	-1.71334	-2.65068	0.00105	0.00941355
XLOC_022619	XLOC_022619	BAX	chr19:49458071-49465055	s202	Ctrls	OK	134.818	41.141	-1.71237	-2.53613	0.00335	0.0228759
XLOC_050300	XLOC_050300	MOSPD2	chrX:14891562-14940449	s202	Ctrls	OK	13.13	4.01038	-1.71105	-2.59813	0.00325	0.0223234
XLOC_029949	XLOC_029949	TPST2	chr22:26921457-26992681	s202	Ctrls	OK	36.4277	11.128	-1.71084	-3.09851	0.00275	0.0195719
XLOC_003885	XLOC_003885	SELENBP1	chr1:151336777-151345209	s202	Ctrls	OK	35.2737	10.7801	-1.71022	-2.33966	0.00365	0.0243803
XLOC_042880	XLOC_042880	AC073346.2.1	chr7:112740717-112786385	s202	Ctrls	OK	39.5332	12.084	-1.70997	-2.52352	0.00745	0.0414039
XLOC_000861	XLOC_000861	MIER1	chr1:67390577-67454302	s202	Ctrls	OK	17.7989	5.44159	-1.70969	-2.68864	0.0031	0.0214861
XLOC_017840	XLOC_017840	EIF3C	chr16:28671016-28752102	s202	Ctrls	OK	9.27371	2.84003	-1.70724	-2.15333	0.0028	0.0198425
XLOC_018742	XLOC_018742	NOMO2	chr16:18511181-18573533	s202	Ctrls	OK	14.9634	4.59312	-1.70389	-2.35019	0.00415	0.0265006
XLOC_029446	XLOC_029446	KIAA1671	chr22:25421599-25593415	s202	Ctrls	OK	30.0484	9.23077	-1.70277	-2.64509	0.0034	0.0231221
XLOC_046691	XLOC_046691	LDHAP4	chr9:14921334-14922332	s202	Ctrls	OK	70.9656	21.8485	-1.69959	-3.15157	0.00335	0.0228759
XLOC_042376	XLOC_042376	SEC61G	chr7:54819942-54872621	s202	Ctrls	OK	221.844	68.3131	-1.69931	-3.37722	0.0031	0.0214861
XLOC_050464	XLOC_050464	USP9X	chrX:40944887-41092185	s202	Ctrls	OK	53.8466	16.5856	-1.69892	-2.26297	0.0073	0.0406954		USP9X
XLOC_036852	XLOC_036852	MYO10	chr5:16665394-16936372	s202	Ctrls	OK	47.0625	14.4995	-1.69857	-2.59828	0.00175	0.0138365
XLOC_039811	XLOC_039811	GLO1	chr6:38643718-38670917	s202	Ctrls	OK	132.853	40.9537	-1.69776	-3.09406	0.0014	0.0116579
XLOC_014753	XLOC_014753	SLC7A7	chr14:23242430-23299029	s202	Ctrls	OK	19.9298	6.15101	-1.69603	-2.07923	0.00315	0.0217719
XLOC_012194	XLOC_012194	CKAP4	chr12:106631654-106740793	s202	Ctrls	OK	63.4611	19.6115	-1.69417	-2.90321	0.00305	0.0212506
XLOC_021401	XLOC_021401	SMCHD1	chr18:2655885-2805015	s202	Ctrls	OK	24.3196	7.51968	-1.69338	-3.07303	0.0011	0.00977368
XLOC_012746	XLOC_012746	ALG11,UTP14C	chr13:52586533-52607701	s202	Ctrls	OK	17.1608	5.31301	-1.69151	-2.93412	0.00175	0.0138365
XLOC_032769	XLOC_032769	PHC3	chr3:169804519-169899537	s202	Ctrls	OK	12.1576	3.76499	-1.69115	-1.83087	0.0047	0.0290427
XLOC_047245	XLOC_047245	NINJ1	chr9:95883770-95896570	s202	Ctrls	OK	39.4057	12.2173	-1.68948	-2.47905	0.0055	0.0327448
XLOC_013980	XLOC_013980	CTAGE5,MIA2,RP11-407N17.3.1	chr14:39699434-39856306	s202	Ctrls	OK	26.3033	8.18722	-1.6838	-2.19059	0.008	0.0436433
XLOC_040691	XLOC_040691	FOXK1	chr7:4683387-4811074	s202	Ctrls	OK	35.7007	11.1219	-1.68255	-2.14935	0.00755	0.0418894
XLOC_038261	XLOC_038261	BTN3A1	chr6:26402464-26415444	s202	Ctrls	OK	48.992	15.3191	-1.67721	-2.35487	0.0056	0.0332505
XLOC_017094	XLOC_017094	CLPX	chr15:65440556-65477680	s202	Ctrls	OK	44.9289	14.0542	-1.67665	-2.32681	0.0095	0.0496081
XLOC_001859	XLOC_001859	TOR1AIP1	chr1:179851176-179888412	s202	Ctrls	OK	28.0558	8.80324	-1.67219	-2.55664	0.0022	0.0165208
XLOC_026554	XLOC_026554	TMEM185B	chr2:120978853-120980984	s202	Ctrls	OK	18.7981	5.90434	-1.67074	-2.8796	0.00795	0.0435019
XLOC_020316	XLOC_020316	ITGB4	chr17:73713473-73753898	s202	Ctrls	OK	6.62852	2.08364	-1.66958	-2.24241	0.00925	0.0486218
XLOC_037238	XLOC_037238	POC5	chr5:74969948-75013313	s202	Ctrls	OK	7.12718	2.24375	-1.66742	-1.5753	0.0083	0.0447763
XLOC_021663	XLOC_021663	YES1	chr18:721587-812327	s202	Ctrls	OK	25.0355	7.89042	-1.6658	-2.9717	0.0019	0.0147067
XLOC_020956	XLOC_020956	GHDC	chr17:40341105-40346550	s202	Ctrls	OK	17.6328	5.55882	-1.66542	-2.39957	0.00545	0.0325055
XLOC_039960	XLOC_039960	ELOVL5	chr6:53132195-53213947	s202	Ctrls	OK	136.414	43.0473	-1.664	-2.62007	0.0028	0.0198425
XLOC_024685	XLOC_024685	INSIG2	chr2:118846027-118868573	s202	Ctrls	OK	42.5202	13.4225	-1.6635	-2.20211	0.0092	0.048423
XLOC_025388	XLOC_025388	CYP27A1	chr2:219646471-219680016	s202	Ctrls	OK	31.961	10.0988	-1.66212	-2.33523	0.00675	0.0381969
XLOC_012750	XLOC_012750	HNRNPA1L2	chr13:53191604-53217919	s202	Ctrls	OK	33.7154	10.6549	-1.66189	-2.43241	0.00675	0.0381969
XLOC_017078	XLOC_017078	FAM96A	chr15:64364757-64386217	s202	Ctrls	OK	53.5624	16.9398	-1.6608	-2.55727	0.0077	0.0424493
XLOC_037924	XLOC_037924	UBTD2	chr5:171636643-171711075	s202	Ctrls	OK	45.4253	14.3964	-1.65779	-3.0167	0.002	0.015302
XLOC_040560	XLOC_040560	DYNLT1	chr6:159057505-159065771	s202	Ctrls	OK	297.483	94.2921	-1.6576	-2.78744	0.00385	0.025142
XLOC_044840	XLOC_044840	IMPAD1	chr8:57870491-57906403	s202	Ctrls	OK	40.7271	12.9186	-1.65654	-2.77296	0.0033	0.0225888
XLOC_024134	XLOC_024134	EIF3FP3	chr2:58478574-58479703	s202	Ctrls	OK	135.679	43.1043	-1.6543	-2.49702	0.00445	0.0279231
XLOC_036674	XLOC_036674	FAM153C	chr5:177433405-177483195	s202	Ctrls	OK	303.884	96.6317	-1.65295	-2.2295	0.00755	0.0418894
XLOC_001312	XLOC_001312	NBPF10,NOTCH2NL,RP11-458D21.5.1	chr1:145209118-145370303	s202	Ctrls	OK	40.93	13.0247	-1.65191	-2.6333	0.0023	0.017021
XLOC_024190	XLOC_024190	ACTR2	chr2:65454886-65498387	s202	Ctrls	OK	122.434	38.9939	-1.65068	-2.90575	0.00145	0.0119789
XLOC_039862	XLOC_039862	RPL24P4	chr6:42924082-42924503	s202	Ctrls	OK	604.654	192.748	-1.6494	-4.60155	0.0046	0.0286474
XLOC_022427	XLOC_022427	SIPA1L3	chr19:38397860-38699012	s202	Ctrls	OK	16.4155	5.23611	-1.64849	-2.49558	0.00175	0.0138365
XLOC_034977	XLOC_034977	PRSS12	chr4:119201192-119274158	s202	Ctrls	OK	71.5486	22.8416	-1.64726	-2.27034	0.00905	0.0477852
XLOC_015297	XLOC_015297	GALC	chr14:88176762-88460009	s202	Ctrls	OK	32.3366	10.3374	-1.64529	-2.26997	0.00345	0.0233901
XLOC_008184	XLOC_008184	FDX1	chr11:110300606-110335605	s202	Ctrls	OK	10.6591	3.40858	-1.64484	-2.63938	0.0094	0.0491892
XLOC_052203	XLOC_052203	SMARCA1	chrX:128580479-128657477	s202	Ctrls	OK	56.59	18.1532	-1.64033	-2.96516	0.0017	0.0135543
XLOC_002303	XLOC_002303	TSNAX	chr1:231658133-231702270	s202	Ctrls	OK	24.5754	7.89167	-1.63882	-2.5207	0.00445	0.0279231
XLOC_023078	XLOC_023078	KANK2	chr19:11274943-11308243	s202	Ctrls	OK	14.1017	4.52872	-1.6387	-2.57731	0.0031	0.0214861
XLOC_052305	XLOC_052305	ATP11C	chrX:138808504-139027435	s202	Ctrls	OK	15.8303	5.08666	-1.63789	-2.29093	0.0095	0.0496081
XLOC_043517	XLOC_043517	FZD3	chr8:28351728-28431775	s202	Ctrls	OK	39.2514	12.6126	-1.63788	-2.44849	0.00485	0.0297294
XLOC_014381	XLOC_014381	CPSF2	chr14:92588280-92630755	s202	Ctrls	OK	21.4579	6.90022	-1.63679	-2.3906	0.00615	0.0356123
XLOC_024176	XLOC_024176	LGALSL	chr2:64681102-64688515	s202	Ctrls	OK	43.3427	13.9412	-1.63644	-2.6013	0.0041	0.0262741
XLOC_005666	XLOC_005666	RPL13AP5	chr10:98510044-98510675	s202	Ctrls	OK	1792.3	577.067	-1.635	-2.12276	0.00605	0.0351664
XLOC_008738	XLOC_008738	SPTY2D1	chr11:18621333-18656338	s202	Ctrls	OK	8.78012	2.83123	-1.63281	-2.44375	0.0042	0.0267169
XLOC_039042	XLOC_039042	NUS1	chr6:117996664-118031803	s202	Ctrls	OK	19.7419	6.37021	-1.63185	-2.93595	0.0029	0.0203841
XLOC_004142	XLOC_004142	ALDH9A1	chr1:165631452-165679205	s202	Ctrls	OK	91.5482	29.5889	-1.62947	-2.65782	0.0039	0.0253436
XLOC_036566	XLOC_036566	CCDC99	chr5:169010637-169031782	s202	Ctrls	OK	17.503	5.66038	-1.62863	-1.8916	0.0063	0.0362697
XLOC_021117	XLOC_021117	TOB1	chr17:48939583-48987098	s202	Ctrls	OK	54.5207	17.7005	-1.62301	-2.9291	0.00465	0.0288054
XLOC_022037	XLOC_022037	RPL36	chr19:5690271-5691674	s202	Ctrls	OK	860.53	279.573	-1.622	-2.2347	0.0038	0.0249795
XLOC_003634	XLOC_003634	PPM1J,RHOC	chr1:113243727-113258099	s202	Ctrls	OK	200.339	65.1648	-1.62028	-2.54998	0.0023	0.017021
XLOC_003305	XLOC_003305	SERBP1	chr1:67873492-67896098	s202	Ctrls	OK	89.0863	28.9831	-1.61999	-2.67988	0.0022	0.0165208
XLOC_034861	XLOC_034861	DNAJB14	chr4:100817404-100867883	s202	Ctrls	OK	18.0758	5.88227	-1.61961	-2.09234	0.0069	0.038957
XLOC_000121	XLOC_000121	H6PD	chr1:9294862-9331396	s202	Ctrls	OK	15.3056	4.99278	-1.61614	-2.75114	0.0025	0.0181631
XLOC_020493	XLOC_020493	PFN1	chr17:4848946-4860426	s202	Ctrls	OK	282.447	92.1394	-1.61609	-2.64542	0.0025	0.0181631
XLOC_052464	XLOC_052464	RPS4Y1	chrY:2709526-2800041	s202	Ctrls	OK	368.734	120.417	-1.61454	-2.91073	0.0035	0.0236565
XLOC_038151	XLOC_038151	RNF182	chr6:13924676-13980533	s202	Ctrls	OK	40.6524	13.2818	-1.61389	-2.48971	0.0083	0.0447763
XLOC_038093	XLOC_038093	CDYL	chr6:4706344-4955785	s202	Ctrls	OK	16.5725	5.41455	-1.61388	-2.29319	0.0061	0.0354053
XLOC_013139	XLOC_013139	LNX2	chr13:28120049-28194541	s202	Ctrls	OK	8.59835	2.81026	-1.61336	-2.5318	0.00735	0.0409512
XLOC_031313	XLOC_031313	GMPS	chr3:155588324-155658457	s202	Ctrls	OK	24.0049	7.87045	-1.60881	-2.38208	0.00655	0.0373414
XLOC_037836	XLOC_037836	HAVCR2,MED7	chr5:156512842-156682201	s202	Ctrls	OK	32.2217	10.5776	-1.60702	-2.30836	0.0076	0.0420729
XLOC_023991	XLOC_023991	SLC30A6	chr2:32390932-32449448	s202	Ctrls	OK	12.4877	4.10237	-1.60598	-2.45708	0.00365	0.0243803
XLOC_043930	XLOC_043930	CA2	chr8:86239836-86393693	s202	Ctrls	OK	145.735	47.9172	-1.60474	-2.61607	0.00435	0.0274952
XLOC_007946	XLOC_007946	SERPINH1	chr11:75273100-75283832	s202	Ctrls	OK	139.36	45.8251	-1.60461	-2.51462	0.00185	0.014432
XLOC_028395	XLOC_028395	DSN1	chr20:35380193-35402230	s202	Ctrls	OK	8.77176	2.88679	-1.6034	-2.09151	0.0065	0.0371309
XLOC_051997	XLOC_051997	TSPAN6	chrX:99883666-99894988	s202	Ctrls	OK	44.0207	14.4969	-1.60244	-2.53098	0.00685	0.0386967
XLOC_030422	XLOC_030422	TGFBR2	chr3:30647993-30735634	s202	Ctrls	OK	14.4787	4.77269	-1.60106	-2.52163	0.00545	0.0325055
XLOC_005926	XLOC_005926	MGMT	chr10:131265447-131566271	s202	Ctrls	OK	18.69	6.16289	-1.60058	-2.24947	0.00935	0.0490179
XLOC_012371	XLOC_012371	VPS37B	chr12:123349881-123380991	s202	Ctrls	OK	80.4286	26.5507	-1.59896	-2.61566	0.00265	0.0190511
XLOC_021834	XLOC_021834	IER3IP1	chr18:44681412-44702745	s202	Ctrls	OK	40.3942	13.3575	-1.5965	-2.95956	0.0055	0.0327448
XLOC_045768	XLOC_045768	RP11-220I1.1.1	chr9:37079892-37090398	s202	Ctrls	OK	44.8119	14.8257	-1.59578	-2.93624	0.0012	0.0104065
XLOC_045990	XLOC_045990	SMC5	chr9:72873936-72969804	s202	Ctrls	OK	19.7827	6.54834	-1.59504	-2.69381	0.0051	0.0308905
XLOC_016666	XLOC_016666	MAGEL2	chr15:23888690-23891175	s202	Ctrls	OK	15.0368	4.97907	-1.59455	-2.40214	0.00885	0.0469036
XLOC_022596	XLOC_022596	GLTSCR2	chr19:48248792-48260323	s202	Ctrls	OK	146.082	48.4989	-1.59076	-1.94878	0.0039	0.0253436
XLOC_020188	XLOC_020188	RPS6KB1	chr17:57970446-58027925	s202	Ctrls	OK	23.5355	7.81842	-1.58989	-2.37474	0.00625	0.0360654
XLOC_033412	XLOC_033412	PAICS	chr4:57301906-57327534	s202	Ctrls	OK	55.9702	18.6067	-1.58884	-2.68609	0.00355	0.023897
XLOC_005477	XLOC_005477	VCL	chr10:75757871-75879918	s202	Ctrls	OK	49.2209	16.4133	-1.5844	-2.44808	0.0048	0.0294866
XLOC_003069	XLOC_003069	SLC2A1	chr1:43391518-43424539	s202	Ctrls	OK	117.539	39.2686	-1.5817	-2.64844	0.00235	0.0172945
XLOC_052154	XLOC_052154	LAMP2	chrX:119561681-119603220	s202	Ctrls	OK	66.784	22.3135	-1.58158	-2.77952	0.00195	0.0149656
XLOC_018366	XLOC_018366	VAT1L	chr16:77822426-78014004	s202	Ctrls	OK	83.641	27.9855	-1.57953	-2.67022	0.0027	0.0193197
XLOC_022109	XLOC_022109	SLC44A2	chr19:10713120-10755235	s202	Ctrls	OK	191.596	64.2035	-1.57735	-2.50988	0.0042	0.0267169
XLOC_010238	XLOC_010238	FGD4	chr12:32552462-32798984	s202	Ctrls	OK	15.4055	5.17969	-1.57251	-2.5029	0.00215	0.0162065
XLOC_002348	XLOC_002348	EDARADD	chr1:236511561-236648026	s202	Ctrls	OK	96.7761	32.5589	-1.5716	-2.57706	0.00395	0.0255766
XLOC_006154	XLOC_006154	YME1L1	chr10:27399382-27475848	s202	Ctrls	OK	75.6779	25.5178	-1.56837	-2.6017	0.0041	0.0262741
XLOC_011369	XLOC_011369	LRP6	chr12:12202796-12419946	s202	Ctrls	OK	26.6695	8.99994	-1.5672	-2.08939	0.00875	0.0465348
XLOC_001897	XLOC_001897	RGL1	chr1:183605207-183897666	s202	Ctrls	OK	60.1468	20.3083	-1.56642	-2.78037	0.00185	0.014432
XLOC_017080	XLOC_017080	PPIB	chr15:64443913-64455404	s202	Ctrls	OK	288.839	97.5397	-1.56621	-2.2888	0.0059	0.0344962
XLOC_002404	XLOC_002404	PPPDE1	chr1:244816236-244872335	s202	Ctrls	OK	31.3921	10.6272	-1.56263	-2.48324	0.00615	0.0356123
XLOC_028498	XLOC_028498	ZNF334	chr20:45129708-45142198	s202	Ctrls	OK	14.17	4.8028	-1.56089	-2.44887	0.00815	0.0441588
XLOC_021778	XLOC_021778	CDH2	chr18:25530929-25757410	s202	Ctrls	OK	88.858	30.1527	-1.55921	-2.58373	0.0036	0.024103
XLOC_039770	XLOC_039770	RPS10	chr6:34385230-34393902	s202	Ctrls	OK	217.99	74.2451	-1.55389	-2.40931	0.0036	0.024103
XLOC_003204	XLOC_003204	TMEM48	chr1:54231132-54304533	s202	Ctrls	OK	16.1502	5.52112	-1.54852	-2.66844	0.0042	0.0267169
XLOC_051933	XLOC_051933	ITM2A	chrX:78615880-78623164	s202	Ctrls	OK	119.325	40.8626	-1.54605	-2.61263	0.0049	0.0299252
XLOC_039099	XLOC_039099	RPS12	chr6:133135579-133138703	s202	Ctrls	OK	457.209	156.829	-1.54366	-2.52654	0.00315	0.0217719
XLOC_000682	XLOC_000682	CMPK1	chr1:47799468-47844511	s202	Ctrls	OK	65.4618	22.6556	-1.53078	-2.79884	0.0019	0.0147067
XLOC_046853	XLOC_046853	PIGO	chr9:35088684-35098138	s202	Ctrls	OK	21.324	7.3891	-1.52901	-2.21457	0.0081	0.0439717
XLOC_004457	XLOC_004457	LRRN2	chr1:204586297-204654861	s202	Ctrls	OK	52.5526	18.2488	-1.52596	-2.63178	0.00385	0.025142
XLOC_045772	XLOC_045772	GRHPR	chr9:37422662-37436987	s202	Ctrls	OK	104.656	36.3451	-1.52583	-2.33738	0.00525	0.0315778
XLOC_034098	XLOC_034098	CLCN3	chr4:170533783-170644824	s202	Ctrls	OK	64.9679	22.582	-1.52455	-2.46843	0.0055	0.0327448
XLOC_030131	XLOC_030131	ST13	chr22:41220538-41253026	s202	Ctrls	OK	98.3407	34.299	-1.51962	-2.63846	0.00345	0.0233901
XLOC_042172	XLOC_042172	AC073150.4.1	chr7:27497781-27498468	s202	Ctrls	OK	136.859	47.7513	-1.51908	-3.45546	0.00625	0.0360654
XLOC_019842	XLOC_019842	CPD	chr17:28705941-28796730	s202	Ctrls	OK	21.7322	7.59631	-1.51646	-2.77797	0.00295	0.0206552
XLOC_028599	XLOC_028599	CTSZ	chr20:57570239-57582302	s202	Ctrls	OK	61.7748	21.6509	-1.51259	-2.23149	0.00765	0.0422909
XLOC_050348	XLOC_050348	PTCHD1	chrX:23352132-23422489	s202	Ctrls	OK	15.0065	5.27837	-1.50742	-2.92375	0.00315	0.0217719
XLOC_015389	XLOC_015389	RPL3P4	chr14:99439215-99439638	s202	Ctrls	OK	1529.55	539.823	-1.50255	-4.21391	0.00625	0.0360654
XLOC_047101	XLOC_047101	KLF9	chr9:72999502-73029540	s202	Ctrls	OK	31.0033	10.9586	-1.50036	-2.71288	0.00375	0.0246998
XLOC_010051	XLOC_010051	EIF2S3L.1	chr12:10658200-10675734	s202	Ctrls	OK	46.5724	16.4643	-1.50014	-2.54829	0.00695	0.0391725
XLOC_026922	XLOC_026922	SP3	chr2:174771186-174830430	s202	Ctrls	OK	39.2401	13.8841	-1.4989	-2.43223	0.0069	0.038957
XLOC_029558	XLOC_029558	HMOX1	chr22:35776353-35790207	s202	Ctrls	OK	56.0607	19.8556	-1.49744	-2.26814	0.0084	0.0451687
XLOC_018095	XLOC_018095	CTD-2119F7.2.1	chr16:51679666-51681043	s202	Ctrls	OK	151.72	53.862	-1.49408	-2.31521	0.00775	0.0426304
XLOC_007345	XLOC_007345	QSER1	chr11:32914723-33014862	s202	Ctrls	OK	11.979	4.25693	-1.49262	-2.26063	0.00495	0.0301565
XLOC_001268	XLOC_001268	PHGDH	chr1:120202420-120286838	s202	Ctrls	OK	65.3825	23.2775	-1.48997	-2.44901	0.0048	0.0294866
XLOC_040909	XLOC_040909	2013-09-07	chr7:35840541-35944917	s202	Ctrls	OK	228.385	81.3284	-1.48964	-2.30761	0.0085	0.0455832
XLOC_041626	XLOC_041626	CALU	chr7:128379345-128411861	s202	Ctrls	OK	67.9578	24.2082	-1.48914	-2.48231	0.00795	0.0435019
XLOC_016026	XLOC_016026	PLDN,RP11-96O20.4.1,SQRDL	chr15:45879320-45983492	s202	Ctrls	OK	60.3631	21.5541	-1.4857	-2.05519	0.0077	0.0424493
XLOC_003331	XLOC_003331	ZRANB2	chr1:71514537-71546980	s202	Ctrls	OK	129.166	46.1354	-1.48528	-2.45385	0.0041	0.0262741
XLOC_021916	XLOC_021916	RTTN	chr18:67671044-67872962	s202	Ctrls	OK	12.5467	4.48152	-1.48525	-2.66656	0.00595	0.0346865
XLOC_005793	XLOC_005793	SMC3	chr10:112327448-112364394	s202	Ctrls	OK	24.6588	8.82136	-1.48303	-2.4524	0.0053	0.0318112
XLOC_030775	XLOC_030775	RP11-642N14.1.1	chr3:75263781-75264787	s202	Ctrls	OK	134.646	48.344	-1.47776	-3.20666	0.00415	0.0265006
XLOC_021903	XLOC_021903	VPS4B	chr18:61056422-61089693	s202	Ctrls	OK	18.1197	6.51339	-1.47608	-2.51817	0.0077	0.0424493
XLOC_033849	XLOC_033849	HSPA4L	chr4:128702975-128755226	s202	Ctrls	OK	21.2105	7.63133	-1.47477	-2.26435	0.0093	0.048833
XLOC_037503	XLOC_037503	CDO1	chr5:115140429-115152651	s202	Ctrls	OK	81.0918	29.272	-1.47003	-2.55704	0.00595	0.0346865
XLOC_006873	XLOC_006873	EIF3A	chr10:120794355-120840396	s202	Ctrls	OK	82.4246	29.8559	-1.46506	-2.13336	0.00875	0.0465348
XLOC_037549	XLOC_037549	CEP120	chr5:122680578-122759286	s202	Ctrls	OK	10.8	3.91325	-1.46459	-2.19846	0.0082	0.0443934
XLOC_015903	XLOC_015903	FAM98B	chr15:38746327-38779911	s202	Ctrls	OK	23.0306	8.39004	-1.4568	-2.21434	0.0081	0.0439717
XLOC_035917	XLOC_035917	AGGF1	chr5:76325075-76361059	s202	Ctrls	OK	16.9899	6.20851	-1.45236	-2.47484	0.0058	0.0340919
XLOC_046629	XLOC_046629	RFX3	chr9:3218296-3526004	s202	Ctrls	OK	19.7268	7.23036	-1.44802	-2.50736	0.00305	0.0212506
XLOC_034473	XLOC_034473	PDS5A	chr4:39824482-39979576	s202	Ctrls	OK	47.8791	17.5617	-1.44696	-2.32108	0.0063	0.0362697
XLOC_000383	XLOC_000383	HMGN2	chr1:26798940-26802463	s202	Ctrls	OK	155.428	57.0553	-1.44581	-2.56359	0.0055	0.0327448
XLOC_040172	XLOC_040172	EPHA7	chr6:93949737-94129265	s202	Ctrls	OK	12.1365	4.45653	-1.44537	-2.35344	0.00955	0.0498038
XLOC_042193	XLOC_042193	GGCT	chr7:30536236-30544460	s202	Ctrls	OK	87.3469	32.1365	-1.44254	-2.57974	0.00615	0.0356123
XLOC_032960	XLOC_032960	PPP1R2	chr3:195241220-195270209	s202	Ctrls	OK	22.6003	8.34123	-1.43801	-2.45994	0.0073	0.0406954
XLOC_032827	XLOC_032827	ZMAT3	chr3:178735010-178790067	s202	Ctrls	OK	13.6172	5.03094	-1.43653	-2.59391	0.00545	0.0325055
XLOC_002866	XLOC_002866	WASF2	chr1:27730729-27816669	s202	Ctrls	OK	34.5186	12.7634	-1.43536	-2.51143	0.00525	0.0315778
XLOC_026080	XLOC_026080	PELI1	chr2:64319785-64479993	s202	Ctrls	OK	64.3667	23.8424	-1.43278	-2.48987	0.00925	0.0486218
XLOC_021139	XLOC_021139	VEZF1	chr17:56048909-56065615	s202	Ctrls	OK	30.6783	11.3868	-1.42986	-2.59869	0.0067	0.0380438
XLOC_005746	XLOC_005746	C10orf26	chr10:104503726-104576021	s202	Ctrls	OK	32.9651	12.2625	-1.42668	-2.55293	0.00485	0.0297294
XLOC_008310	XLOC_008310	TBCEL	chr11:120894780-120961484	s202	Ctrls	OK	11.9889	4.47067	-1.42314	-2.2895	0.00645	0.0369407
XLOC_043450	XLOC_043450	FGF17	chr8:21899908-21906320	s202	Ctrls	OK	76.5126	28.554	-1.422	-2.09284	0.00855	0.0458143
XLOC_003120	XLOC_003120	PIK3R3	chr1:46505811-46651630	s202	Ctrls	OK	29.044	10.8459	-1.42109	-2.47053	0.00465	0.0288054
XLOC_005381	XLOC_005381	SIRT1	chr10:69644426-69678147	s202	Ctrls	OK	21.0135	7.84729	-1.42105	-2.49241	0.00745	0.0414039
XLOC_052043	XLOC_052043	TCEAL8	chrX:102507922-102510131	s202	Ctrls	OK	73.2905	27.4347	-1.41762	-2.56362	0.00635	0.0364625
XLOC_013978	XLOC_013978	PNN	chr14:39644088-39652422	s202	Ctrls	OK	95.5018	35.8235	-1.41462	-2.40828	0.00585	0.0342542
XLOC_025534	XLOC_025534	SH3BP4	chr2:235860616-235964358	s202	Ctrls	OK	13.8202	5.18914	-1.41321	-1.95025	0.00885	0.0469036
XLOC_023538	XLOC_023538	KDELR1	chr19:48885826-48894810	s202	Ctrls	OK	140.527	52.7662	-1.41317	-2.8831	0.00695	0.0391725
XLOC_015130	XLOC_015130	ZFP36L1	chr14:69254376-69263190	s202	Ctrls	OK	132.413	50.0684	-1.40308	-2.51721	0.0084	0.0451687
XLOC_038514	XLOC_038514	RPL10A	chr6:35436184-35438562	s202	Ctrls	OK	401.733	152.224	-1.40004	-2.25407	0.00825	0.0445791
XLOC_007278	XLOC_007278	ANO5	chr11:22214721-22304903	s202	Ctrls	OK	8.39436	3.18382	-1.39866	-2.37133	0.0085	0.0455832
XLOC_027850	XLOC_027850	PIGT	chr20:44044706-44054884	s202	Ctrls	OK	47.595	18.1191	-1.3933	-2.25702	0.00805	0.0438079
XLOC_021479	XLOC_021479	RIOK3	chr18:21032786-21063104	s202	Ctrls	OK	27.5251	10.53	-1.38625	-2.48388	0.0072	0.0402508
XLOC_030370	XLOC_030370	RAB5A	chr3:19988570-20053822	s202	Ctrls	OK	72.0964	27.5913	-1.38571	-2.60885	0.0066	0.0375726
XLOC_000916	XLOC_000916	TPI1P1	chr1:77165473-77166223	s202	Ctrls	OK	281.083	107.854	-1.38191	-2.80512	0.00845	0.0453762
XLOC_015144	XLOC_015144	SLC8A3	chr14:70510933-70696904	s202	Ctrls	OK	42.4336	16.3248	-1.37814	-2.24718	0.00955	0.0498038
XLOC_046321	XLOC_046321	ATP6V1G1	chr9:117350025-117360653	s202	Ctrls	OK	87.9281	34.5109	-1.34927	-2.35044	0.009	0.0475591
XLOC_052155	XLOC_052155	CUL4B	chrX:119658463-119709649	s202	Ctrls	OK	53.9666	21.2855	-1.34219	-2.29157	0.00785	0.0430851
XLOC_041209	XLOC_041209	WBSCR17	chr7:70597154-71178585	s202	Ctrls	OK	89.0184	35.2121	-1.33803	-2.37703	0.0081	0.0439717
XLOC_021800	XLOC_021800	ZNF24	chr18:32912175-32924420	s202	Ctrls	OK	35.5216	14.513	-1.29135	-2.37356	0.00825	0.0445791
XLOC_000120	XLOC_000120	RP3-510D11.2.1	chr1:9228326-9262678	s202	Ctrls	OK	9.28332	0	-inf	nan	5e-05	0.000800523
XLOC_000611	XLOC_000611	FAM183A	chr1:43610028-43622067	s202	Ctrls	OK	0.832369	0	-inf	nan	5e-05	0.000800523
XLOC_000674	XLOC_000674	CYP4B1	chr1:47223509-47285085	s202	Ctrls	OK	1.15242	0	-inf	nan	5e-05	0.000800523
XLOC_000825	XLOC_000825	L1TD1	chr1:62660502-62678000	s202	Ctrls	OK	88.3303	0	-inf	nan	5e-05	0.000800523
XLOC_000891	XLOC_000891	ZRANB2-AS2	chr1:71547006-71733913	s202	Ctrls	OK	0.76134	0	-inf	nan	0.0003	0.00353406
XLOC_001243	XLOC_001243	CD2	chr1:117297006-117311850	s202	Ctrls	OK	27.6102	0	-inf	nan	5e-05	0.000800523
XLOC_001480	XLOC_001480	LCE4A	chr1:152680635-152681967	s202	Ctrls	OK	1.09248	0	-inf	nan	0.00225	0.0168074
XLOC_001587	XLOC_001587	KRT8P45	chr1:157043048-157044494	s202	Ctrls	OK	2.46347	0	-inf	nan	5e-05	0.000800523
XLOC_001606	XLOC_001606	OR10Z1	chr1:158565303-158577170	s202	Ctrls	OK	0.962981	0	-inf	nan	0.0001	0.00146536
XLOC_001620	XLOC_001620	OR10J1	chr1:159315955-159453166	s202	Ctrls	OK	0.769469	0	-inf	nan	0.0004	0.00445852
XLOC_001647	XLOC_001647	LY9	chr1:160765895-160798045	s202	Ctrls	OK	0.802419	0	-inf	nan	5e-05	0.000800523
XLOC_002043	XLOC_002043	LAX1	chr1:203734303-203745361	s202	Ctrls	OK	1.44141	0	-inf	nan	5e-05	0.000800523
XLOC_002111	XLOC_002111	MIR205,MIR205HG	chr1:209602164-209606183	s202	Ctrls	OK	5.2226	0	-inf	nan	5e-05	0.000800523
XLOC_002435	XLOC_002435	OR2W5	chr1:247654369-247655710	s202	Ctrls	OK	1.03672	0	-inf	nan	5e-05	0.000800523
XLOC_002619	XLOC_002619	RP3-510D11.1.1	chr1:9228326-9262678	s202	Ctrls	OK	1.08697	0	-inf	nan	0.0076	0.0420729
XLOC_002758	XLOC_002758	PLA2G2D	chr1:20438431-20446050	s202	Ctrls	OK	1.62115	0	-inf	nan	5e-05	0.000800523
XLOC_002759	XLOC_002759	PLA2G2C	chr1:20487745-20503917	s202	Ctrls	OK	1.04199	0	-inf	nan	0.00025	0.00306111
XLOC_003147	XLOC_003147	RP5-1024N4.1.1	chr1:48630300-48648100	s202	Ctrls	OK	0.782654	0	-inf	nan	0.0005	0.00529702
XLOC_003421	XLOC_003421	RP11-76N22.1.1	chr1:88964039-88964359	s202	Ctrls	OK	2.0627	0	-inf	nan	0.0037	0.0244352
XLOC_003556	XLOC_003556	RP5-947P14.2.1	chr1:106615868-106627121	s202	Ctrls	OK	0.941284	0	-inf	nan	0.00095	0.00872149
XLOC_003831	XLOC_003831	FAM72C	chr1:149438749-149459549	s202	Ctrls	OK	0.756339	0	-inf	nan	0.0001	0.00146536
XLOC_003931	XLOC_003931	S100A5	chr1:153509622-153514241	s202	Ctrls	OK	1.79234	0	-inf	nan	5e-05	0.000800523
XLOC_004049	XLOC_004049	OR10K2	chr1:158389717-158390656	s202	Ctrls	OK	1.78077	0	-inf	nan	5e-05	0.000800523
XLOC_004168	XLOC_004168	RP5-968D22.2.1	chr1:168418898-168420449	s202	Ctrls	OK	1.07593	0	-inf	nan	5e-05	0.000800523
XLOC_005288	XLOC_005288	C10orf71	chr10:50507186-50535537	s202	Ctrls	OK	0.633964	0	-inf	nan	5e-05	0.000800523
XLOC_005348	XLOC_005348	RP11-131N11.4.1	chr10:62494099-62501586	s202	Ctrls	OK	2.41357	0	-inf	nan	0.00015	0.00202358
XLOC_005632	XLOC_005632	CYP26C1	chr10:94821020-94828454	s202	Ctrls	OK	1.01275	0	-inf	nan	5e-05	0.000800523
XLOC_005716	XLOC_005716	TLX1	chr10:102849077-102901023	s202	Ctrls	OK	1.91389	0	-inf	nan	5e-05	0.000800523
XLOC_005841	XLOC_005841	PNLIPRP1	chr10:118349896-118368687	s202	Ctrls	OK	1.02756	0	-inf	nan	5e-05	0.000800523
XLOC_005890	XLOC_005890	RP11-564D11.3.1	chr10:124639245-124658230	s202	Ctrls	OK	1.60291	0	-inf	nan	5e-05	0.000800523
XLOC_006002	XLOC_006002	TUBAL3	chr10:5435060-5446793	s202	Ctrls	OK	1.72818	0	-inf	nan	5e-05	0.000800523
XLOC_006121	XLOC_006121	RP11-275N1.1.1	chr10:21629161-21661879	s202	Ctrls	OK	4.32864	0	-inf	nan	5e-05	0.000800523
XLOC_006129	XLOC_006129	EBLN1	chr10:22498233-22498933	s202	Ctrls	OK	1.33333	0	-inf	nan	5e-05	0.000800523
XLOC_006433	XLOC_006433	MRPL35P2	chr10:65394076-65394587	s202	Ctrls	OK	1.70264	0	-inf	nan	0.00015	0.00202358
XLOC_006769	XLOC_006769	FGF8	chr10:103530080-103535827	s202	Ctrls	OK	5.93219	0	-inf	nan	5e-05	0.000800523
XLOC_007083	XLOC_007083	OR51D1	chr11:4660944-4662068	s202	Ctrls	OK	1.16087	0	-inf	nan	5e-05	0.000800523
XLOC_007097	XLOC_007097	OR52J3	chr11:5067755-5068691	s202	Ctrls	OK	1.89339	0	-inf	nan	5e-05	0.000800523
XLOC_007123	XLOC_007123	OR56A3	chr11:5968569-5969591	s202	Ctrls	OK	1.01059	0	-inf	nan	5e-05	0.000800523
XLOC_007140	XLOC_007140	OR10A5	chr11:6866882-6867936	s202	Ctrls	OK	0.819191	0	-inf	nan	0.00015	0.00202358
XLOC_007366	XLOC_007366	EHF	chr11:34642639-34682604	s202	Ctrls	OK	0.75167	0	-inf	nan	5e-05	0.000800523
XLOC_007465	XLOC_007465	OR4X1	chr11:48285412-48286330	s202	Ctrls	OK	0.975532	0	-inf	nan	0.00015	0.00202358
XLOC_007596	XLOC_007596	OR6Q1	chr11:57791352-57949088	s202	Ctrls	OK	1.10014	0	-inf	nan	0.00015	0.00202358
XLOC_007817	XLOC_007817	RP11-655M14.12.1	chr11:67370350-67374177	s202	Ctrls	OK	5.83965	0	-inf	nan	5e-05	0.000800523
XLOC_008080	XLOC_008080	MTNR1B	chr11:92702885-92718232	s202	Ctrls	OK	0.854752	0	-inf	nan	5e-05	0.000800523
XLOC_008261	XLOC_008261	CD3E	chr11:118175259-118186890	s202	Ctrls	OK	30.4883	0	-inf	nan	5e-05	0.000800523
XLOC_008262	XLOC_008262	CD3G	chr11:118215058-118225876	s202	Ctrls	OK	6.87655	0	-inf	nan	5e-05	0.000800523
XLOC_008281	XLOC_008281	AP003392.1	chr11:118865043-118865269	s202	Ctrls	OK	7.24289	0	-inf	nan	0.00065	0.00642408
XLOC_008348	XLOC_008348	OR8G2P.1	chr11:124095436-124096365	s202	Ctrls	OK	0.797474	0	-inf	nan	0.0004	0.00445852
XLOC_008427	XLOC_008427	AP002856.5.1	chr11:131123316-131170666	s202	Ctrls	OK	1.35317	0	-inf	nan	0.00015	0.00202358
XLOC_008554	XLOC_008554	OR52R1	chr11:4726156-5013659	s202	Ctrls	OK	1.31117	0	-inf	nan	0.0003	0.00353406
XLOC_008568	XLOC_008568	OR52A5	chr11:5152921-5153872	s202	Ctrls	OK	7.04281	0	-inf	nan	5e-05	0.000800523
XLOC_008569	XLOC_008569	OR52A1	chr11:5172238-5207612	s202	Ctrls	OK	0.688519	0	-inf	nan	5e-05	0.000800523
XLOC_008599	XLOC_008599	RP11-451K18.7.1	chr11:5988406-5989724	s202	Ctrls	OK	0.666214	0	-inf	nan	0.0023	0.017021
XLOC_008623	XLOC_008623	OR2AG2	chr11:6789217-6790286	s202	Ctrls	OK	1.07522	0	-inf	nan	5e-05	0.000800523
XLOC_008649	XLOC_008649	ASCL3	chr11:8959118-8964580	s202	Ctrls	OK	0.820884	0	-inf	nan	0.00115	0.0100961
XLOC_008990	XLOC_008990	OR8H1	chr11:56057528-56058566	s202	Ctrls	OK	0.65043	0	-inf	nan	0.0012	0.0104065
XLOC_009007	XLOC_009007	OR5AP2	chr11:56408941-56409947	s202	Ctrls	OK	1.22766	0	-inf	nan	5e-05	0.000800523
XLOC_009051	XLOC_009051	OR5B2	chr11:58189737-58190786	s202	Ctrls	OK	1.20742	0	-inf	nan	5e-05	0.000800523
XLOC_009073	XLOC_009073	OR5A2	chr11:59189415-59190449	s202	Ctrls	OK	1.22308	0	-inf	nan	5e-05	0.000800523
XLOC_009087	XLOC_009087	MS4A4E	chr11:59968725-60010561	s202	Ctrls	OK	0.680019	0	-inf	nan	5e-05	0.000800523
XLOC_009175	XLOC_009175	C11orf85	chr11:64704988-64739557	s202	Ctrls	OK	1.43956	0	-inf	nan	5e-05	0.000800523
XLOC_009286	XLOC_009286	FGF19	chr11:69512999-69519410	s202	Ctrls	OK	21.6687	0	-inf	nan	5e-05	0.000800523
XLOC_009398	XLOC_009398	RP11-672A2.1.1	chr11:76423439-76430652	s202	Ctrls	OK	0.961632	0	-inf	nan	5e-05	0.000800523
XLOC_009586	XLOC_009586	RP11-886D15.1.1	chr11:104316595-104480049	s202	Ctrls	OK	1.42088	0	-inf	nan	5e-05	0.000800523
XLOC_009721	XLOC_009721	CD3D	chr11:118209668-118213459	s202	Ctrls	OK	16.6161	0	-inf	nan	5e-05	0.000800523
XLOC_009786	XLOC_009786	OR6X1	chr11:123624195-123625253	s202	Ctrls	OK	1.02424	0	-inf	nan	5e-05	0.000800523
XLOC_009812	XLOC_009812	OR8B12	chr11:124412577-124413575	s202	Ctrls	OK	1.1439	0	-inf	nan	5e-05	0.000800523
XLOC_010039	XLOC_010039	RP11-75L1.1.1	chr12:9856672-9861946	s202	Ctrls	OK	1.31315	0	-inf	nan	0.00065	0.00642408
XLOC_010324	XLOC_010324	RP11-579D7.4.1	chr12:49182929-49184318	s202	Ctrls	OK	3.42335	0	-inf	nan	5e-05	0.000800523
XLOC_010481	XLOC_010481	OR10P1	chr12:56030643-56031638	s202	Ctrls	OK	0.980635	0	-inf	nan	5e-05	0.000800523
XLOC_011507	XLOC_011507	RP11-771K4.1.1	chr12:31516414-31522235	s202	Ctrls	OK	11.6579	0	-inf	nan	5e-05	0.000800523
XLOC_011540	XLOC_011540	RP11-313F23.5.1	chr12:34343971-34371788	s202	Ctrls	OK	1.90056	0	-inf	nan	5e-05	0.000800523
XLOC_011629	XLOC_011629	OR10AD1	chr12:48596080-48597170	s202	Ctrls	OK	1.10072	0	-inf	nan	5e-05	0.000800523
XLOC_011741	XLOC_011741	KRT76	chr12:53161938-53171129	s202	Ctrls	OK	1.04995	0	-inf	nan	5e-05	0.000800523
XLOC_011941	XLOC_011941	RP11-81H14.2.1	chr12:68726667-68845443	s202	Ctrls	OK	9.6773	0	-inf	nan	5e-05	0.000800523
XLOC_012079	XLOC_012079	RP11-486A14.2.1	chr12:93710910-93771512	s202	Ctrls	OK	1.8993	0	-inf	nan	0.00015	0.00202358
XLOC_012694	XLOC_012694	SPERT	chr13:46276445-46288694	s202	Ctrls	OK	0.678247	0	-inf	nan	0.0005	0.00529702
XLOC_013099	XLOC_013099	BASP1P1	chr13:23471479-23472144	s202	Ctrls	OK	7.16789	0	-inf	nan	5e-05	0.000800523
XLOC_013533	XLOC_013533	ASNSP3	chr13:100714549-100715855	s202	Ctrls	OK	0.787621	0	-inf	nan	5e-05	0.000800523
XLOC_013623	XLOC_013623	AL589743.1.1,RP11-146E13.1.1,RP11-146E13.2.1,RP11-496I2.4.1	chr14:19650017-19925348	s202	Ctrls	OK	3.85797	0	-inf	nan	5e-05	0.000800523
XLOC_013636	XLOC_013636	OR4N2	chr14:20187173-20296531	s202	Ctrls	OK	0.774422	0	-inf	nan	0.00115	0.0100961
XLOC_013644	XLOC_013644	OR4K5	chr14:20388740-20389818	s202	Ctrls	OK	1.10502	0	-inf	nan	5e-05	0.000800523
XLOC_013657	XLOC_013657	OR11G2	chr14:20665494-20666605	s202	Ctrls	OK	1.15949	0	-inf	nan	5e-05	0.000800523
XLOC_013701	XLOC_013701	TRAV1-2	chr14:22111108-22111798	s202	Ctrls	OK	2.4518	0	-inf	nan	0.00015	0.00202358
XLOC_013704	XLOC_013704	TRAV3	chr14:22191959-22192568	s202	Ctrls	OK	1.6567	0	-inf	nan	0.00015	0.00202358
XLOC_013715	XLOC_013715	TRAV12-1	chr14:22309421-22309956	s202	Ctrls	OK	4.15845	0	-inf	nan	5e-05	0.000800523
XLOC_013718	XLOC_013718	TRAV13-1	chr14:22337019-22337546	s202	Ctrls	OK	3.89825	0	-inf	nan	5e-05	0.000800523
XLOC_013719	XLOC_013719	TRAV12-2	chr14:22356036-22356682	s202	Ctrls	OK	1.80028	0	-inf	nan	0.00065	0.00642408
XLOC_013720	XLOC_013720	TRAV8-4	chr14:22362612-22363210	s202	Ctrls	OK	2.44258	0	-inf	nan	5e-05	0.000800523
XLOC_013722	XLOC_013722	TRAV13-2	chr14:22386362-22386931	s202	Ctrls	OK	1.62579	0	-inf	nan	0.0037	0.0244352
XLOC_013723	XLOC_013723	TRAV14/DV4.1	chr14:22392238-22392827	s202	Ctrls	OK	2.0871	0	-inf	nan	0.00015	0.00202358
XLOC_013729	XLOC_013729	TRAV17	chr14:22465777-22466407	s202	Ctrls	OK	1.48508	0	-inf	nan	0.00065	0.00642408
XLOC_013731	XLOC_013731	TRAV19	chr14:22475750-22476420	s202	Ctrls	OK	4.97887	0	-inf	nan	5e-05	0.000800523
XLOC_013734	XLOC_013734	TRAV21	chr14:22520772-22521315	s202	Ctrls	OK	2.58137	0	-inf	nan	0.00065	0.00642408
XLOC_013735	XLOC_013735	TRAV22	chr14:22538819-22539471	s202	Ctrls	OK	1.14117	0	-inf	nan	0.0037	0.0244352
XLOC_013737	XLOC_013737	TRDV1	chr14:22564308-22564896	s202	Ctrls	OK	3.41512	0	-inf	nan	0.00015	0.00202358
XLOC_013738	XLOC_013738	TRAV24	chr14:22573619-22574123	s202	Ctrls	OK	2.98143	0	-inf	nan	0.00065	0.00642408
XLOC_013739	XLOC_013739	TRAV25	chr14:22580299-22580984	s202	Ctrls	OK	1.54838	0	-inf	nan	0.0037	0.0244352
XLOC_013745	XLOC_013745	TRAV29DV5	chr14:22631133-22631766	s202	Ctrls	OK	5.62144	0	-inf	nan	5e-05	0.000800523
XLOC_013753	XLOC_013753	TRAV36DV7	chr14:22694640-22695149	s202	Ctrls	OK	3.49587	0	-inf	nan	0.00015	0.00202358
XLOC_014255	XLOC_014255	VRTN	chr14:74769771-74826711	s202	Ctrls	OK	3.00276	0	-inf	nan	5e-05	0.000800523
XLOC_014666	XLOC_014666	CTD-2314B22.2.1,CTD-2314B22.3.1,RP11-496I2.6.1	chr14:19650017-19925348	s202	Ctrls	OK	3.75129	0	-inf	nan	5e-05	0.000800523
XLOC_014681	XLOC_014681	OR4K14	chr14:20482418-20483352	s202	Ctrls	OK	1.1584	0	-inf	nan	5e-05	0.000800523
XLOC_014734	XLOC_014734	AE000658.26.1	chr14:22070046-22070976	s202	Ctrls	OK	0.927321	0	-inf	nan	0.00015	0.00202358
XLOC_014885	XLOC_014885	NKX2-8	chr14:37049215-37051812	s202	Ctrls	OK	0.969371	0	-inf	nan	5e-05	0.000800523
XLOC_015356	XLOC_015356	GSC	chr14:95234552-95236562	s202	Ctrls	OK	1.6937	0	-inf	nan	5e-05	0.000800523
XLOC_015479	XLOC_015479	IGHGP	chr14:106130969-106136180	s202	Ctrls	OK	1.06945	0	-inf	nan	5e-05	0.000800523
XLOC_015524	XLOC_015524	IGHV6-1	chr14:106405610-106406108	s202	Ctrls	OK	3.99914	0	-inf	nan	5e-05	0.000800523
XLOC_015528	XLOC_015528	IGHV1-2	chr14:106452670-106453170	s202	Ctrls	OK	1.44028	0	-inf	nan	0.0037	0.0244352
XLOC_015530	XLOC_015530	IGHV1-3	chr14:106471245-106471723	s202	Ctrls	OK	6.7926	0	-inf	nan	5e-05	0.000800523
XLOC_015531	XLOC_015531	IGHV4-4	chr14:106478109-106478603	s202	Ctrls	OK	9.70053	0	-inf	nan	5e-05	0.000800523
XLOC_015536	XLOC_015536	IGHV3-7	chr14:106518399-106518932	s202	Ctrls	OK	15.1781	0	-inf	nan	5e-05	0.000800523
XLOC_015537	XLOC_015537	IGHV1-8	chr14:106539078-106539577	s202	Ctrls	OK	17.7047	0	-inf	nan	5e-05	0.000800523
XLOC_015538	XLOC_015538	IGHV3-9	chr14:106552284-106552809	s202	Ctrls	OK	18.7916	0	-inf	nan	5e-05	0.000800523
XLOC_015540	XLOC_015540	IGHV3-11	chr14:106573232-106573800	s202	Ctrls	OK	11.9822	0	-inf	nan	5e-05	0.000800523
XLOC_015543	XLOC_015543	IGHV3-13	chr14:106586136-106586667	s202	Ctrls	OK	3.02389	0	-inf	nan	5e-05	0.000800523
XLOC_015552	XLOC_015552	IGHV1-18	chr14:106641562-106642056	s202	Ctrls	OK	25.584	0	-inf	nan	5e-05	0.000800523
XLOC_015565	XLOC_015565	IGHV2-26	chr14:106757649-106758116	s202	Ctrls	OK	2.87179	0	-inf	nan	0.00015	0.00202358
XLOC_015572	XLOC_015572	IGHV3-30	chr14:106791004-106791536	s202	Ctrls	OK	17.4026	0	-inf	nan	5e-05	0.000800523
XLOC_015575	XLOC_015575	IGHV4-31	chr14:106805208-106805716	s202	Ctrls	OK	11.5001	0	-inf	nan	5e-05	0.000800523
XLOC_015578	XLOC_015578	IGHV3-33	chr14:106815721-106816253	s202	Ctrls	OK	4.78807	0	-inf	nan	5e-05	0.000800523
XLOC_015581	XLOC_015581	IGHV4-34	chr14:106829593-106830076	s202	Ctrls	OK	6.0801	0	-inf	nan	5e-05	0.000800523
XLOC_015595	XLOC_015595	IGHV3-43	chr14:106926187-106926724	s202	Ctrls	OK	2.62122	0	-inf	nan	5e-05	0.000800523
XLOC_015605	XLOC_015605	IGHV3-48	chr14:106993813-106994346	s202	Ctrls	OK	7.85473	0	-inf	nan	5e-05	0.000800523
XLOC_015613	XLOC_015613	IGHV3-53	chr14:107048671-107049341	s202	Ctrls	OK	3.65289	0	-inf	nan	5e-05	0.000800523
XLOC_015619	XLOC_015619	IGHV1-58	chr14:107078372-107078869	s202	Ctrls	OK	1.89187	0	-inf	nan	0.00065	0.00642408
XLOC_015630	XLOC_015630	IGHV3-66	chr14:107131032-107131560	s202	Ctrls	OK	1.27731	0	-inf	nan	0.0037	0.0244352
XLOC_015638	XLOC_015638	IGHV1-69	chr14:107169930-107170428	s202	Ctrls	OK	5.82784	0	-inf	nan	5e-05	0.000800523
XLOC_015642	XLOC_015642	IGHV3-73	chr14:107210931-107211471	s202	Ctrls	OK	3.7647	0	-inf	nan	5e-05	0.000800523
XLOC_016152	XLOC_016152	FOXB1	chr15:60296420-60353929	s202	Ctrls	OK	1.40292	0	-inf	nan	5e-05	0.000800523
XLOC_016326	XLOC_016326	ISL2	chr15:76629064-76634817	s202	Ctrls	OK	0.846572	0	-inf	nan	5e-05	0.000800523
XLOC_017514	XLOC_017514	Z69890.1.1	chr16:281132-281471	s202	Ctrls	OK	2.01086	0	-inf	nan	0.0037	0.0244352
XLOC_017917	XLOC_017917	ITGAD	chr16:31404596-31437826	s202	Ctrls	OK	2.07584	0	-inf	nan	5e-05	0.000800523
XLOC_017981	XLOC_017981	AC135776.1	chr16:34232105-34232469	s202	Ctrls	OK	2.36593	0	-inf	nan	0.0037	0.0244352
XLOC_018145	XLOC_018145	MT1H	chr16:56703725-56705041	s202	Ctrls	OK	4.49993	0	-inf	nan	5e-05	0.000800523
XLOC_018651	XLOC_018651	TMEM114	chr16:8619501-8622304	s202	Ctrls	OK	3.87214	0	-inf	nan	5e-05	0.000800523
XLOC_019512	XLOC_019512	OR1A1	chr17:3118914-3119844	s202	Ctrls	OK	1.34474	0	-inf	nan	5e-05	0.000800523
XLOC_019935	XLOC_019935	LRRC3C	chr17:38097726-38100987	s202	Ctrls	OK	1.17772	0	-inf	nan	5e-05	0.000800523
XLOC_020095	XLOC_020095	B4GALNT2	chr17:47209821-47247351	s202	Ctrls	OK	1.66177	0	-inf	nan	5e-05	0.000800523
XLOC_020166	XLOC_020166	OR4D1	chr17:56232493-56233517	s202	Ctrls	OK	1.17212	0	-inf	nan	5e-05	0.000800523
XLOC_020202	XLOC_020202	C17orf82	chr17:59489111-59490641	s202	Ctrls	OK	2.89484	0	-inf	nan	5e-05	0.000800523
XLOC_020888	XLOC_020888	KRT25	chr17:38904271-38911584	s202	Ctrls	OK	0.658873	0	-inf	nan	5e-05	0.000800523
XLOC_020905	XLOC_020905	KRTAP1-1	chr17:39196810-39197713	s202	Ctrls	OK	3.57111	0	-inf	nan	5e-05	0.000800523
XLOC_020920	XLOC_020920	KRTAP16-1	chr17:39463951-39465505	s202	Ctrls	OK	2.26703	0	-inf	nan	5e-05	0.000800523
XLOC_021059	XLOC_021059	HOXB7,HOXB8	chr17:46684589-46724385	s202	Ctrls	OK	1.188	0	-inf	nan	5e-05	0.000800523
XLOC_021312	XLOC_021312	RP11-87G24.3.1,RP11-87G24.4.1	chr17:74946555-74965238	s202	Ctrls	OK	1.28553	0	-inf	nan	0.00015	0.00202358
XLOC_021471	XLOC_021471	GATA6	chr18:19749403-19782491	s202	Ctrls	OK	0.690744	0	-inf	nan	5e-05	0.000800523		GATA6
XLOC_021632	XLOC_021632	CTD-2354A18.1.1	chr18:70992175-71017113	s202	Ctrls	OK	1.34165	0	-inf	nan	5e-05	0.000800523
XLOC_022084	XLOC_022084	OR1M1	chr19:9203854-9204889	s202	Ctrls	OK	0.703501	0	-inf	nan	0.00015	0.00202358
XLOC_022205	XLOC_022205	OR1I1	chr19:15197790-15199032	s202	Ctrls	OK	1.37356	0	-inf	nan	5e-05	0.000800523
XLOC_022216	XLOC_022216	OR10H2	chr19:15838833-15839862	s202	Ctrls	OK	1.7013	0	-inf	nan	5e-05	0.000800523
XLOC_022220	XLOC_022220	OR10H4	chr19:16059817-16060768	s202	Ctrls	OK	1.78637	0	-inf	nan	5e-05	0.000800523
XLOC_022312	XLOC_022312	AC011467.1	chr19:22867968-22869468	s202	Ctrls	OK	1.22078	0	-inf	nan	5e-05	0.000800523
XLOC_022360	XLOC_022360	AC008555.2	chr19:35343054-35343524	s202	Ctrls	OK	1.26081	0	-inf	nan	0.0037	0.0244352
XLOC_022465	XLOC_022465	LGALS14	chr19:40194945-40200087	s202	Ctrls	OK	0.746138	0	-inf	nan	0.0003	0.00353406
XLOC_022663	XLOC_022663	GPR32	chr19:51273857-51274928	s202	Ctrls	OK	0.929503	0	-inf	nan	5e-05	0.000800523
XLOC_022947	XLOC_022947	C19orf77	chr19:3474404-3480540	s202	Ctrls	OK	0.64129	0	-inf	nan	0.00015	0.00202358
XLOC_023038	XLOC_023038	MUC16	chr19:8959519-9092018	s202	Ctrls	OK	13.7312	0	-inf	nan	5e-05	0.000800523
XLOC_023149	XLOC_023149	OR7C1	chr19:14909957-14911023	s202	Ctrls	OK	0.976448	0	-inf	nan	5e-05	0.000800523
XLOC_023450	XLOC_023450	AC005392.1	chr19:43879659-43883276	s202	Ctrls	OK	1.67158	0	-inf	nan	0.0037	0.0244352
XLOC_023641	XLOC_023641	AC010487.1	chr19:53418449-53421126	s202	Ctrls	OK	103.502	0	-inf	nan	5e-05	0.000800523
XLOC_023709	XLOC_023709	TMEM238	chr19:55890612-55895627	s202	Ctrls	OK	4.64144	0	-inf	nan	5e-05	0.000800523
XLOC_023713	XLOC_023713	SBK2	chr19:56041099-56048456	s202	Ctrls	OK	0.822273	0	-inf	nan	5e-05	0.000800523
XLOC_024069	XLOC_024069	AC012354.6.1	chr2:45181802-45195901	s202	Ctrls	OK	0.947868	0	-inf	nan	5e-05	0.000800523
XLOC_024310	XLOC_024310	REG3G	chr2:79252811-79255631	s202	Ctrls	OK	1.84204	0	-inf	nan	5e-05	0.000800523
XLOC_024396	XLOC_024396	IGKV5-2	chr2:89196747-89197300	s202	Ctrls	OK	7.8742	0	-inf	nan	5e-05	0.000800523
XLOC_024407	XLOC_024407	IGKV2D-29	chr2:89986321-89987079	s202	Ctrls	OK	1.78555	0	-inf	nan	0.0037	0.0244352
XLOC_024415	XLOC_024415	AC009958.1,IGKV6D-21	chr2:90060376-90061001	s202	Ctrls	OK	1.39729	0	-inf	nan	0.0006	0.00610906
XLOC_024422	XLOC_024422	IGKV3D-15	chr2:90153695-90154258	s202	Ctrls	OK	1.56492	0	-inf	nan	0.0037	0.0244352
XLOC_024425	XLOC_024425	IGKV1D-12	chr2:90198534-90199190	s202	Ctrls	OK	1.30476	0	-inf	nan	0.00065	0.00642408
XLOC_024763	XLOC_024763	AC018804.6.1	chr2:130959884-130970201	s202	Ctrls	OK	0.977391	0	-inf	nan	0.00015	0.00202358
XLOC_024888	XLOC_024888	PABPC1P2	chr2:147345011-147346878	s202	Ctrls	OK	0.709618	0	-inf	nan	5e-05	0.000800523
XLOC_025063	XLOC_025063	HOXD8	chr2:176986338-177055688	s202	Ctrls	OK	1.0499	0	-inf	nan	0.00355	0.023897
XLOC_025269	XLOC_025269	ICOS	chr2:204801470-204826300	s202	Ctrls	OK	1.8895	0	-inf	nan	5e-05	0.000800523
XLOC_025447	XLOC_025447	RP11-395N3.1.1	chr2:227668751-227669777	s202	Ctrls	OK	4.68354	0	-inf	nan	5e-05	0.000800523
XLOC_025807	XLOC_025807	C2orf53	chr2:27359722-27362278	s202	Ctrls	OK	0.72822	0	-inf	nan	5e-05	0.000800523
XLOC_025943	XLOC_025943	RP11-89K21.1.1	chr2:45147331-45166338	s202	Ctrls	OK	10.7519	0	-inf	nan	5e-05	0.000800523
XLOC_026261	XLOC_026261	CD8B	chr2:87042461-87092827	s202	Ctrls	OK	8.64921	0	-inf	nan	5e-05	0.000800523
XLOC_026295	XLOC_026295	IGKV1-9	chr2:89309478-89310012	s202	Ctrls	OK	2.69155	0	-inf	nan	0.00015	0.00202358
XLOC_026298	XLOC_026298	IGKV1-12	chr2:89339720-89340242	s202	Ctrls	OK	5.43611	0	-inf	nan	5e-05	0.000800523
XLOC_026299	XLOC_026299	IGKV1-13	chr2:89345491-89345963	s202	Ctrls	OK	2.12924	0	-inf	nan	0.0037	0.0244352
XLOC_026301	XLOC_026301	IGKV3-15	chr2:89384672-89385283	s202	Ctrls	OK	10.6434	0	-inf	nan	5e-05	0.000800523
XLOC_026316	XLOC_026316	IGKV2-30	chr2:89544263-89545079	s202	Ctrls	OK	4.00515	0	-inf	nan	5e-05	0.000800523
XLOC_026319	XLOC_026319	IGKV1-33	chr2:89567757-89568263	s202	Ctrls	OK	1.80869	0	-inf	nan	0.0037	0.0244352
XLOC_026325	XLOC_026325	IGKV1-39	chr2:89619382-89619904	s202	Ctrls	OK	2.13936	0	-inf	nan	0.00065	0.00642408
XLOC_026385	XLOC_026385	AC021188.4.1	chr2:96973000-96987469	s202	Ctrls	OK	1.63855	0	-inf	nan	5e-05	0.000800523
XLOC_026602	XLOC_026602	AC079776.2.1	chr2:130680434-130704276	s202	Ctrls	OK	1.73711	0	-inf	nan	0.00035	0.00400446
XLOC_026991	XLOC_026991	KRT8P10	chr2:183935767-183937214	s202	Ctrls	OK	2.81597	0	-inf	nan	5e-05	0.000800523
XLOC_027128	XLOC_027128	MRPL50P2	chr2:204180112-204180594	s202	Ctrls	OK	1.20559	0	-inf	nan	0.0037	0.0244352
XLOC_027494	XLOC_027494	C20orf141,C20orf141.1,TMEM239	chr20:2795613-2800930	s202	Ctrls	OK	0.90815	0	-inf	nan	5e-05	0.000800523
XLOC_028247	XLOC_028247	LINC00261,RP11-216C10.1.1	chr20:22528308-22559280	s202	Ctrls	OK	6.50834	0	-inf	nan	5e-05	0.000800523
XLOC_028248	XLOC_028248	FOXA2	chr20:22561642-22566093	s202	Ctrls	OK	18.6674	0	-inf	nan	5e-05	0.000800523
XLOC_028583	XLOC_028583	CTCFL	chr20:56071020-56100708	s202	Ctrls	OK	0.795714	0	-inf	nan	5e-05	0.000800523
XLOC_028935	XLOC_028935	RPL39P40	chr21:18872996-18873142	s202	Ctrls	OK	54.5006	0	-inf	nan	0.00065	0.00642408
XLOC_029017	XLOC_029017	CLDN17	chr21:31538240-31538971	s202	Ctrls	OK	0.866866	0	-inf	nan	0.00065	0.00642408
XLOC_029115	XLOC_029115	AP000696.2.1	chr21:38004978-38009331	s202	Ctrls	OK	1.22003	0	-inf	nan	5e-05	0.000800523
XLOC_029312	XLOC_029312	IGLV6-57	chr22:22550112-22550686	s202	Ctrls	OK	10.5476	0	-inf	nan	5e-05	0.000800523
XLOC_029315	XLOC_029315	IGLV10-54	chr22:22569183-22569660	s202	Ctrls	OK	2.82823	0	-inf	nan	0.00015	0.00202358
XLOC_029322	XLOC_029322	IGLV9-49	chr22:22697538-22698084	s202	Ctrls	OK	2.83807	0	-inf	nan	5e-05	0.000800523
XLOC_029329	XLOC_029329	IGLV5-45	chr22:22730354-22730874	s202	Ctrls	OK	2.22114	0	-inf	nan	0.00065	0.00642408
XLOC_029330	XLOC_029330	IGLV1-44	chr22:22735134-22735715	s202	Ctrls	OK	12.3327	0	-inf	nan	5e-05	0.000800523
XLOC_029331	XLOC_029331	IGLV7-43	chr22:22749355-22749827	s202	Ctrls	OK	2.37353	0	-inf	nan	0.00065	0.00642408
XLOC_029338	XLOC_029338	IGLV5-37	chr22:22781875-22782371	s202	Ctrls	OK	4.92138	0	-inf	nan	5e-05	0.000800523
XLOC_029368	XLOC_029368	IGLV3-16	chr22:23089869-23090398	s202	Ctrls	OK	3.67066	0	-inf	nan	5e-05	0.000800523
XLOC_029374	XLOC_029374	IGLV2-11	chr22:23134976-23135496	s202	Ctrls	OK	21.349	0	-inf	nan	5e-05	0.000800523
XLOC_029377	XLOC_029377	IGLV3-9	chr22:23161506-23162253	s202	Ctrls	OK	8.22531	0	-inf	nan	5e-05	0.000800523
XLOC_029378	XLOC_029378	IGLV2-8	chr22:23165152-23165787	s202	Ctrls	OK	6.23181	0	-inf	nan	5e-05	0.000800523
XLOC_029385	XLOC_029385	IGLV4-3	chr22:23213685-23214214	s202	Ctrls	OK	1.55884	0	-inf	nan	0.0037	0.0244352
XLOC_029387	XLOC_029387	IGLV3-1	chr22:23222885-23223576	s202	Ctrls	OK	34.8527	0	-inf	nan	5e-05	0.000800523
XLOC_029411	XLOC_029411	AP000344.3.1	chr22:23775750-23777258	s202	Ctrls	OK	2.43902	0	-inf	nan	5e-05	0.000800523
XLOC_029412	XLOC_029412	AP000344.4.1	chr22:23788784-23803020	s202	Ctrls	OK	5.00198	0	-inf	nan	5e-05	0.000800523
XLOC_029756	XLOC_029756	AP000525.8.1	chr22:16147978-16193004	s202	Ctrls	OK	3.25855	0	-inf	nan	5e-05	0.000800523
XLOC_029885	XLOC_029885	ZNF280A	chr22:22868059-22874613	s202	Ctrls	OK	1.05076	0	-inf	nan	5e-05	0.000800523
XLOC_029886	XLOC_029886	PRAME	chr22:22890122-22909007	s202	Ctrls	OK	127.443	0	-inf	nan	5e-05	0.000800523
XLOC_029932	XLOC_029932	RP3-462D8.2.1	chr22:25675495-25679061	s202	Ctrls	OK	2.27072	0	-inf	nan	5e-05	0.000800523
XLOC_030085	XLOC_030085	LGALS2	chr22:37966254-37978623	s202	Ctrls	OK	1.60579	0	-inf	nan	5e-05	0.000800523
XLOC_030560	XLOC_030560	CCR3	chr3:46205095-46308197	s202	Ctrls	OK	1.19319	0	-inf	nan	5e-05	0.000800523
XLOC_030930	XLOC_030930	TRAT1	chr3:108541544-108573852	s202	Ctrls	OK	1.90854	0	-inf	nan	5e-05	0.000800523
XLOC_030990	XLOC_030990	C3orf30,RP11-484M3.5.1,UPK1B	chr3:118864996-118924000	s202	Ctrls	OK	16.4358	0	-inf	nan	5e-05	0.000800523
XLOC_031031	XLOC_031031	CSTA	chr3:122044090-122060819	s202	Ctrls	OK	4.32814	0	-inf	nan	5e-05	0.000800523
XLOC_031096	XLOC_031096	RP11-434H6.2.1	chr3:128764605-128765764	s202	Ctrls	OK	1.48346	0	-inf	nan	5e-05	0.000800523
XLOC_031242	XLOC_031242	RP11-639B1.1.1	chr3:147795945-147805816	s202	Ctrls	OK	4.17701	0	-inf	nan	5e-05	0.000800523
XLOC_031345	XLOC_031345	ARL14	chr3:160394947-160396233	s202	Ctrls	OK	0.722713	0	-inf	nan	5e-05	0.000800523
XLOC_031936	XLOC_031936	XCR1	chr3:46058515-46069234	s202	Ctrls	OK	2.3879	0	-inf	nan	5e-05	0.000800523
XLOC_032790	XLOC_032790	SLC31A1P1	chr3:172321229-172321796	s202	Ctrls	OK	3.2542	0	-inf	nan	5e-05	0.000800523
XLOC_033507	XLOC_033507	MUC7	chr4:71296208-71348714	s202	Ctrls	OK	1.23337	0	-inf	nan	5e-05	0.000800523
XLOC_033657	XLOC_033657	ATOH1	chr4:94750041-94751221	s202	Ctrls	OK	0.948011	0	-inf	nan	5e-05	0.000800523
XLOC_033983	XLOC_033983	RP11-18H21.1.1	chr4:153021905-153025872	s202	Ctrls	OK	0.938486	0	-inf	nan	5e-05	0.000800523
XLOC_034113	XLOC_034113	RP11-471J12.1.1	chr4:174446119-174512475	s202	Ctrls	OK	1.22685	0	-inf	nan	5e-05	0.000800523
XLOC_034226	XLOC_034226	RP11-478C6.5.1	chr4:263654-263964	s202	Ctrls	OK	3.72884	0	-inf	nan	0.00065	0.00642408
XLOC_034286	XLOC_034286	OTOP1	chr4:4190529-4228616	s202	Ctrls	OK	3.78568	0	-inf	nan	5e-05	0.000800523
XLOC_034748	XLOC_034748	GK2	chr4:80327507-80329372	s202	Ctrls	OK	0.723195	0	-inf	nan	5e-05	0.000800523
XLOC_035313	XLOC_035313	HAND2	chr4:174446119-174512475	s202	Ctrls	OK	3.66427	0	-inf	nan	5e-05	0.000800523
XLOC_035595	XLOC_035595	RP11-46C20.1.1	chr5:27472398-27496508	s202	Ctrls	OK	4.97488	0	-inf	nan	5e-05	0.000800523
XLOC_035914	XLOC_035914	S100Z	chr5:76145825-76217475	s202	Ctrls	OK	0.820152	0	-inf	nan	0.00025	0.00306111
XLOC_036573	XLOC_036573	GABRP	chr5:170174050-170241051	s202	Ctrls	OK	8.19422	0	-inf	nan	5e-05	0.000800523
XLOC_037754	XLOC_037754	SPINK1	chr5:147204130-147211349	s202	Ctrls	OK	1.4825	0	-inf	nan	0.0067	0.0380438
XLOC_038188	XLOC_038188	KRT18P38	chr6:19535174-19640814	s202	Ctrls	OK	1.38708	0	-inf	nan	5e-05	0.000800523
XLOC_039089	XLOC_039089	RP3-523C21.2.1	chr6:132406223-132420419	s202	Ctrls	OK	6.56796	0	-inf	nan	5e-05	0.000800523
XLOC_039092	XLOC_039092	TAAR9	chr6:132859428-132860470	s202	Ctrls	OK	1.00321	0	-inf	nan	5e-05	0.000800523
XLOC_039369	XLOC_039369	RP4-668J24.2.1	chr6:1384024-1385301	s202	Ctrls	OK	2.79734	0	-inf	nan	5e-05	0.000800523
XLOC_039544	XLOC_039544	HIST1H1T	chr6:26107639-26108364	s202	Ctrls	OK	0.774642	0	-inf	nan	0.00065	0.00642408
XLOC_039551	XLOC_039551	HIST1H3F	chr6:26250369-26250835	s202	Ctrls	OK	1.58775	0	-inf	nan	0.00065	0.00642408
XLOC_039552	XLOC_039552	HIST1H3G	chr6:26271145-26271612	s202	Ctrls	OK	4.47634	0	-inf	nan	5e-05	0.000800523
XLOC_039585	XLOC_039585	HIST1H2AM,HIST1H3J	chr6:27858092-27860963	s202	Ctrls	OK	5.40261	0	-inf	nan	5e-05	0.000800523
XLOC_039816	XLOC_039816	KCNK5	chr6:39156748-39197226	s202	Ctrls	OK	0.74271	0	-inf	nan	5e-05	0.000800523
XLOC_040197	XLOC_040197	SIM1	chr6:100832890-100912805	s202	Ctrls	OK	0.69586	0	-inf	nan	5e-05	0.000800523
XLOC_040999	XLOC_040999	C7orf57	chr7:48075107-48100901	s202	Ctrls	OK	0.786933	0	-inf	nan	5e-05	0.000800523
XLOC_041227	XLOC_041227	ABHD11-AS1	chr7:73149367-73150384	s202	Ctrls	OK	1.75306	0	-inf	nan	5e-05	0.000800523
XLOC_041659	XLOC_041659	CPA5	chr7:129984629-130008571	s202	Ctrls	OK	14.4053	0	-inf	nan	5e-05	0.000800523
XLOC_041770	XLOC_041770	TRBV3-1	chr7:142008364-142008871	s202	Ctrls	OK	6.60877	0	-inf	nan	5e-05	0.000800523
XLOC_041771	XLOC_041771	TRBV4-1	chr7:142013006-142013489	s202	Ctrls	OK	7.05595	0	-inf	nan	5e-05	0.000800523
XLOC_041772	XLOC_041772	TRBV5-1	chr7:142020495-142021363	s202	Ctrls	OK	1.08493	0	-inf	nan	0.00015	0.00202358
XLOC_041773	XLOC_041773	TRBV6-1	chr7:142028120-142028610	s202	Ctrls	OK	1.43918	0	-inf	nan	0.0037	0.0244352
XLOC_041775	XLOC_041775	TRBV4-2	chr7:142045251-142045816	s202	Ctrls	OK	1.16565	0	-inf	nan	0.0037	0.0244352
XLOC_041776	XLOC_041776	TRBV19	chr7:142326362-142327046	s202	Ctrls	OK	3.00095	0	-inf	nan	5e-05	0.000800523
XLOC_041777	XLOC_041777	TRBV20-1	chr7:142334162-142334913	s202	Ctrls	OK	7.06638	0	-inf	nan	5e-05	0.000800523
XLOC_041789	XLOC_041789	TRBV28	chr7:142428483-142428984	s202	Ctrls	OK	18.0059	0	-inf	nan	5e-05	0.000800523
XLOC_041807	XLOC_041807	OR6V1	chr7:142749416-142750444	s202	Ctrls	OK	1.05125	0	-inf	nan	5e-05	0.000800523
XLOC_042094	XLOC_042094	PRPS1L1	chr7:18066404-18067486	s202	Ctrls	OK	0.772417	0	-inf	nan	5e-05	0.000800523
XLOC_042161	XLOC_042161	HOXA3,HOXA4,HOXA6	chr7:27145815-27197555	s202	Ctrls	OK	2.07445	0	-inf	nan	5e-05	0.000800523
XLOC_042259	XLOC_042259	TRGV10	chr7:38339411-38339923	s202	Ctrls	OK	4.08745	0	-inf	nan	5e-05	0.000800523
XLOC_042262	XLOC_042262	TRGV8	chr7:38369943-38370536	s202	Ctrls	OK	1.71777	0	-inf	nan	0.00065	0.00642408
XLOC_042268	XLOC_042268	TRGV3	chr7:38398112-38398763	s202	Ctrls	OK	1.43683	0	-inf	nan	0.00065	0.00642408
XLOC_042269	XLOC_042269	TRGV2	chr7:38402464-38403119	s202	Ctrls	OK	2.43138	0	-inf	nan	5e-05	0.000800523
XLOC_042455	XLOC_042455	RP11-73B2.6.1	chr7:63385164-63386684	s202	Ctrls	OK	2.90646	0	-inf	nan	0.00015	0.00202358
XLOC_042997	XLOC_042997	KLF14	chr7:130417400-130418888	s202	Ctrls	OK	2.38467	0	-inf	nan	5e-05	0.000800523
XLOC_043060	XLOC_043060	KLRG2	chr7:139137435-139168458	s202	Ctrls	OK	0.833465	0	-inf	nan	5e-05	0.000800523
XLOC_043101	XLOC_043101	TRBV5-6	chr7:142131411-142131918	s202	Ctrls	OK	1.99733	0	-inf	nan	0.00065	0.00642408
XLOC_043107	XLOC_043107	TRBV5-4	chr7:142168379-142169045	s202	Ctrls	OK	1.08872	0	-inf	nan	0.00065	0.00642408
XLOC_043109	XLOC_043109	TRBV6-5	chr7:142180514-142181016	s202	Ctrls	OK	7.07224	0	-inf	nan	5e-05	0.000800523
XLOC_043116	XLOC_043116	TRBV9	chr7:142239536-142240058	s202	Ctrls	OK	3.58971	0	-inf	nan	5e-05	0.000800523
XLOC_043124	XLOC_043124	TRBV30	chr7:142510270-142511084	s202	Ctrls	OK	1.14961	0	-inf	nan	0.0037	0.0244352
XLOC_043331	XLOC_043331	RP11-10A14.4.1	chr8:9009251-9025646	s202	Ctrls	OK	2.88219	0	-inf	nan	5e-05	0.000800523
XLOC_044702	XLOC_044702	RP11-675F6.3.1	chr8:38401169-38416538	s202	Ctrls	OK	3.81973	0	-inf	nan	0.00015	0.00202358
XLOC_044703	XLOC_044703	RP11-675F6.4.1	chr8:38401169-38416538	s202	Ctrls	OK	1.25097	0	-inf	nan	0.00445	0.0279231
XLOC_044806	XLOC_044806	RP11-1081M5.1.1	chr8:54307770-54308506	s202	Ctrls	OK	2.26464	0	-inf	nan	5e-05	0.000800523
XLOC_045038	XLOC_045038	RP11-219B4.7.1	chr8:86084311-86089297	s202	Ctrls	OK	1.19081	0	-inf	nan	5e-05	0.000800523
XLOC_045955	XLOC_045955	SNX18P9	chr9:69451763-69452598	s202	Ctrls	OK	0.723393	0	-inf	nan	0.00015	0.00202358
XLOC_046358	XLOC_046358	OR1J2,OR1J4	chr9:125273080-125282361	s202	Ctrls	OK	1.36726	0	-inf	nan	5e-05	0.000800523
XLOC_046363	XLOC_046363	OR1L1	chr9:125423844-125424927	s202	Ctrls	OK	1.01836	0	-inf	nan	0.0001	0.00146536
XLOC_046409	XLOC_046409	LMX1B	chr9:129376721-129463311	s202	Ctrls	OK	3.6515	0	-inf	nan	5e-05	0.000800523
XLOC_047095	XLOC_047095	RP11-109D9.3.1	chr9:72433898-72435655	s202	Ctrls	OK	3.70709	0	-inf	nan	5e-05	0.000800523
XLOC_047484	XLOC_047484	OR1N1	chr9:125288636-125289572	s202	Ctrls	OK	1.35584	0	-inf	nan	5e-05	0.000800523
XLOC_047559	XLOC_047559	HMGA1P4	chr9:131425412-131425857	s202	Ctrls	OK	2.74421	0	-inf	nan	0.00065	0.00642408
XLOC_050370	XLOC_050370	MAGEB6P1	chrX:26178717-26180013	s202	Ctrls	OK	0.708975	0	-inf	nan	5e-05	0.000800523
XLOC_050810	XLOC_050810	P2RY10	chrX:78200828-78217451	s202	Ctrls	OK	3.99292	0	-inf	nan	5e-05	0.000800523
XLOC_050812	XLOC_050812	GPR174	chrX:78426468-78427726	s202	Ctrls	OK	1.52577	0	-inf	nan	5e-05	0.000800523
XLOC_051040	XLOC_051040	SLC6A14	chrX:115567789-115592625	s202	Ctrls	OK	7.97748	0	-inf	nan	5e-05	0.000800523
XLOC_051059	XLOC_051059	MRPS17P9	chrX:118490263-118527558	s202	Ctrls	OK	3.33767	0	-inf	nan	5e-05	0.000800523
XLOC_051433	XLOC_051433	RP11-120D5.1.1	chrX:10981959-11129258	s202	Ctrls	OK	1.07108	0	-inf	nan	0.00065	0.00642408
XLOC_051633	XLOC_051633	CXorf31	chrX:46746851-46759138	s202	Ctrls	OK	1.87148	0	-inf	nan	5e-05	0.000800523
XLOC_051707	XLOC_051707	RP11-56H2.1.1	chrX:51360960-51361446	s202	Ctrls	OK	1.72775	0	-inf	nan	0.00015	0.00202358
XLOC_051763	XLOC_051763	ITIH6	chrX:54775331-54824673	s202	Ctrls	OK	1.50857	0	-inf	nan	5e-05	0.000800523
XLOC_051855	XLOC_051855	CXorf65	chrX:70323836-70326561	s202	Ctrls	OK	2.64301	0	-inf	nan	5e-05	0.000800523
XLOC_051866	XLOC_051866	CXCR3	chrX:70835765-70838367	s202	Ctrls	OK	8.28653	0	-inf	nan	5e-05	0.000800523
XLOC_051949	XLOC_051949	POF1B	chrX:84532401-84634748	s202	Ctrls	OK	27.5257	0	-inf	nan	5e-05	0.000800523
XLOC_052254	XLOC_052254	PLAC1	chrX:133699867-133898352	s202	Ctrls	OK	0.895358	0	-inf	nan	5e-05	0.000800523
XLOC_037015	XLOC_037015	OXCT1	chr5:41730166-41871059	s202	Ctrls	OK	20.3267	50.8883	1.32396	2.30781	0.00865	0.0461883
XLOC_039281	XLOC_039281	TULP4	chr6:158733691-158932860	s202	Ctrls	OK	4.51798	11.3331	1.32679	2.36004	0.00955	0.0498038
XLOC_023137	XLOC_023137	SAMD1	chr19:14198651-14201848	s202	Ctrls	OK	18.0339	45.4268	1.33284	1.97253	0.0094	0.0491892
XLOC_045611	XLOC_045611	RRAGA	chr9:19049371-19051019	s202	Ctrls	OK	39.9688	102.806	1.36298	2.72273	0.008	0.0436433
XLOC_002584	XLOC_002584	ACOT7	chr1:6324332-6454451	s202	Ctrls	OK	38.5796	99.7545	1.37054	2.2606	0.00615	0.0356123
XLOC_002876	XLOC_002876	EYA3	chr1:28296854-28415207	s202	Ctrls	OK	4.18161	10.8523	1.37588	2.22464	0.0073	0.0406954
XLOC_003091	XLOC_003091	ERI3	chr1:44686741-44820932	s202	Ctrls	OK	32.4681	84.5469	1.38073	2.25429	0.00855	0.0458143
XLOC_031714	XLOC_031714	IQSEC1	chr3:12938718-13114617	s202	Ctrls	OK	11.0027	28.681	1.38224	2.31107	0.00775	0.0426304
XLOC_043024	XLOC_043024	AKR1B1	chr7:134127126-134144036	s202	Ctrls	OK	38.3925	100.782	1.39235	2.29288	0.0095	0.0496081
XLOC_020966	XLOC_020966	EZH1	chr17:40852293-40897071	s202	Ctrls	OK	13.9789	36.7518	1.39457	2.41649	0.00745	0.0414039
XLOC_051165	XLOC_051165	FAM127A	chrX:134166332-134167576	s202	Ctrls	OK	72.8145	194.767	1.41945	2.35233	0.0054	0.032275
XLOC_020040	XLOC_020040	FMNL1	chr17:43299291-43324681	s202	Ctrls	OK	7.90553	21.2432	1.42607	2.12057	0.00855	0.0458143
XLOC_005450	XLOC_005450	MCU	chr10:74451888-74647452	s202	Ctrls	OK	8.68324	23.3894	1.42955	2.37313	0.0095	0.0496081
XLOC_045168	XLOC_045168	ANKRD46	chr8:101521979-101572012	s202	Ctrls	OK	20.0604	54.1812	1.43344	2.46242	0.00915	0.0482364
XLOC_032512	XLOC_032512	AMOTL2	chr3:134070693-134094321	s202	Ctrls	OK	8.03738	21.7117	1.43368	1.88601	0.0086	0.0460202
XLOC_020996	XLOC_020996	HDAC5	chr17:42154120-42201014	s202	Ctrls	OK	14.0155	37.9232	1.43606	2.34234	0.00495	0.0301565
XLOC_051314	XLOC_051314	ZNF275	chrX:152599612-152625568	s202	Ctrls	OK	6.06092	16.4675	1.44201	2.15338	0.0079	0.0433117
XLOC_028113	XLOC_028113	SLC23A2	chr20:4833001-4990939	s202	Ctrls	OK	15.9516	43.4127	1.44442	2.46209	0.00635	0.0364625
XLOC_026982	XLOC_026982	CERKL,NEUROD1	chr2:182401402-182545603	s202	Ctrls	OK	3.9203	10.6854	1.44661	1.93814	0.0063	0.0362697
XLOC_023888	XLOC_023888	RHOB	chr2:20646834-20649200	s202	Ctrls	OK	45.6021	124.991	1.45466	2.901	0.00455	0.0284161
XLOC_042035	XLOC_042035	C7orf70	chr7:6369039-6388612	s202	Ctrls	OK	9.67857	26.5365	1.45511	2.38964	0.0067	0.0380438
XLOC_023696	XLOC_023696	PPP1R12C	chr19:55602282-55628927	s202	Ctrls	OK	15.0955	41.4399	1.4569	2.23263	0.0045	0.0281835
XLOC_027691	XLOC_027691	KIF3B	chr20:30865466-30922814	s202	Ctrls	OK	19.001	52.2451	1.45922	2.54762	0.0053	0.0318112
XLOC_038019	XLOC_038019	MAPK9	chr5:179660142-179719099	s202	Ctrls	OK	16.5042	45.5044	1.46317	2.28742	0.00945	0.0494118
XLOC_035611	XLOC_035611	PDZD2	chr5:31639516-32122047	s202	Ctrls	OK	5.89409	16.3212	1.46941	2.01901	0.0067	0.0380438
XLOC_008787	XLOC_008787	RP11-1033A18.1.1	chr11:27910384-27912580	s202	Ctrls	OK	32.0001	88.644	1.46995	2.61006	0.00505	0.0306624
XLOC_047568	XLOC_047568	IER5L	chr9:131937834-131972827	s202	Ctrls	OK	7.21113	20.021	1.47322	2.70402	0.00865	0.0461883
XLOC_038600	XLOC_038600	KLHDC3	chr6:42981950-42989036	s202	Ctrls	OK	49.5716	137.991	1.47699	2.60229	0.00295	0.0206552
XLOC_011652	XLOC_011652	WNT10B	chr12:49359122-49365546	s202	Ctrls	OK	8.16241	22.926	1.48992	2.21848	0.0065	0.0371309
XLOC_020685	XLOC_020685	ULK2	chr17:19674142-19771249	s202	Ctrls	OK	9.12124	25.7338	1.49636	2.51769	0.00415	0.0265006
XLOC_051893	XLOC_051893	NAP1L2	chrX:72432134-72434684	s202	Ctrls	OK	8.35202	23.6771	1.50329	2.38825	0.0077	0.0424493
XLOC_022902	XLOC_022902	R3HDM4	chr19:896502-913225	s202	Ctrls	OK	21.73	61.7007	1.5056	2.92625	0.0046	0.0286474
XLOC_023544	XLOC_023544	CA11	chr19:49141271-49184461	s202	Ctrls	OK	47.1711	134.07	1.50701	2.69103	0.0049	0.0299252
XLOC_019987	XLOC_019987	TUBG2	chr17:40811265-40819021	s202	Ctrls	OK	16.5251	47.1061	1.51126	2.79024	0.00445	0.0279231
XLOC_028230	XLOC_028230	RALGAPA2	chr20:20370195-20693266	s202	Ctrls	OK	6.5942	18.8421	1.51469	2.23201	0.0067	0.0380438
XLOC_019949	XLOC_019949	IGFBP4	chr17:38599701-38613983	s202	Ctrls	OK	9.92492	28.4101	1.51728	2.3259	0.0051	0.0308905
XLOC_004900	XLOC_004900	ZNF692	chr1:249144204-249153343	s202	Ctrls	OK	39.821	113.996	1.51737	2.07626	0.0074	0.0411836
XLOC_051154	XLOC_051154	HPRT1	chrX:133594182-133654543	s202	Ctrls	OK	9.8374	28.3348	1.52623	2.28108	0.0088	0.0467258
XLOC_025785	XLOC_025785	DTNB	chr2:25600066-25896503	s202	Ctrls	OK	10.9478	31.5561	1.52728	1.97317	0.00525	0.0315778
XLOC_017494	XLOC_017494	TARSL2	chr15:102193800-102264807	s202	Ctrls	OK	7.07626	20.4261	1.52935	2.33366	0.0054	0.032275
XLOC_028069	XLOC_028069	FKBP1A	chr20:1290618-1373806	s202	Ctrls	OK	67.1687	194.524	1.53409	2.65758	0.0045	0.0281835
XLOC_027939	XLOC_027939	DOK5	chr20:53092135-53267710	s202	Ctrls	OK	31.4007	91.0073	1.53519	2.5639	0.00715	0.0400163
XLOC_011091	XLOC_011091	AACS	chr12:125549924-125627873	s202	Ctrls	OK	10.9208	31.7193	1.53829	2.26943	0.00775	0.0426304
XLOC_029732	XLOC_029732	PIM3	chr22:50354160-50357728	s202	Ctrls	OK	11.9576	34.8556	1.54347	2.08035	0.0061	0.0354053
XLOC_005867	XLOC_005867	BAG3	chr10:121410881-121484200	s202	Ctrls	OK	12.4037	36.2298	1.54641	2.46387	0.00675	0.0381969
XLOC_021209	XLOC_021209	TEX2	chr17:62224795-62340653	s202	Ctrls	OK	6.03482	17.6445	1.54783	2.53579	0.0044	0.0277231
XLOC_023985	XLOC_023985	EHD3	chr2:31456879-31492313	s202	Ctrls	OK	5.79192	16.9407	1.54838	2.34206	0.00815	0.0441588
XLOC_023180	XLOC_023180	ABHD8	chr19:17402940-17414282	s202	Ctrls	OK	12.5639	36.7801	1.54965	2.30959	0.00385	0.025142
XLOC_046229	XLOC_046229	C9orf30,C9orf30-TMEFF1,TMEFF1	chr9:103189437-103339918	s202	Ctrls	OK	20.8147	60.9373	1.54972	2.59265	0.00515	0.031127
XLOC_028495	XLOC_028495	ELMO2	chr20:44994687-45087915	s202	Ctrls	OK	18.4957	54.5017	1.55911	2.47772	0.0028	0.0198425
XLOC_002909	XLOC_002909	SDC3	chr1:31342313-31381608	s202	Ctrls	OK	30.2078	89.0267	1.55932	2.57695	0.00315	0.0217719
XLOC_043432	XLOC_043432	INTS10	chr8:19674650-19709594	s202	Ctrls	OK	29.3654	87.1026	1.5686	2.38361	0.00805	0.0438079
XLOC_021214	XLOC_021214	AC103810.2	chr17:62745780-62778117	s202	Ctrls	OK	4.76577	14.1645	1.5715	2.57831	0.00845	0.0453762
XLOC_050335	XLOC_050335	CNKSR2	chrX:21392535-21672813	s202	Ctrls	OK	6.46353	19.2394	1.57367	2.60465	0.00295	0.0206552
XLOC_026374	XLOC_026374	LINC00342	chr2:96472865-96481963	s202	Ctrls	OK	14.4607	43.0566	1.57409	2.36129	0.0081	0.0439717
XLOC_020434	XLOC_020434	PITPNA	chr17:1420224-1466110	s202	Ctrls	OK	23.4264	69.9713	1.57862	2.7911	0.0021	0.0159505
XLOC_023704	XLOC_023704	HSPBP1	chr19:55773591-55791751	s202	Ctrls	OK	14.1157	42.1914	1.57965	2.45959	0.00275	0.0195719
XLOC_008198	XLOC_008198	DIXDC1	chr11:111797867-111893308	s202	Ctrls	OK	9.74983	29.3156	1.58822	2.36977	0.00655	0.0373414
XLOC_033965	XLOC_033965	DCLK2	chr4:150999425-151178609	s202	Ctrls	OK	18.5838	55.9418	1.58988	2.46608	0.0042	0.0267169
XLOC_046412	XLOC_046412	ZBTB34	chr9:129622943-129648157	s202	Ctrls	OK	5.17139	15.5673	1.5899	2.73541	0.0052	0.0313529
XLOC_046429	XLOC_046429	C9orf16	chr9:130922538-130926207	s202	Ctrls	OK	38.8656	117.08	1.59093	2.42618	0.00385	0.025142
XLOC_012676	XLOC_012676	DGKZP1	chr13:44542559-44545335	s202	Ctrls	OK	13.3714	40.3016	1.59168	2.76342	0.00375	0.0246998
XLOC_042582	XLOC_042582	HIP1	chr7:75162620-75368280	s202	Ctrls	OK	5.17918	15.6115	1.59181	2.52834	0.00215	0.0162065
XLOC_018620	XLOC_018620	C16orf5	chr16:4560719-4588829	s202	Ctrls	OK	18.2657	55.1757	1.5949	2.74875	0.00275	0.0195719
XLOC_029605	XLOC_029605	PICK1	chr22:38452317-38471708	s202	Ctrls	OK	12.2424	37.0039	1.59579	2.00299	0.0082	0.0443934
XLOC_044468	XLOC_044468	FAM167A	chr8:11197145-11332224	s202	Ctrls	OK	2.97222	9.00235	1.59876	2.18649	0.007	0.0393874
XLOC_025098	XLOC_025098	UBE2E3	chr2:181831974-182264286	s202	Ctrls	OK	30.381	92.0662	1.5995	2.5624	0.00275	0.0195719
XLOC_014623	XLOC_014623	INF2	chr14:105155942-105185942	s202	Ctrls	OK	11.4096	34.6555	1.60283	2.33604	0.00475	0.0292426
XLOC_046841	XLOC_046841	DCTN3	chr9:34613547-34620515	s202	Ctrls	OK	59.5895	181.118	1.6038	2.33561	0.0062	0.0358392
XLOC_038174	XLOC_038174	CAP2	chr6:17393446-17558023	s202	Ctrls	OK	12.7614	38.8773	1.60714	2.53799	0.0029	0.0203841
XLOC_046352	XLOC_046352	DAB2IP	chr9:124329335-124547809	s202	Ctrls	OK	10.0688	30.6976	1.60823	2.23867	0.00465	0.0288054
XLOC_006565	XLOC_006565	DLG5	chr10:79542623-79686378	s202	Ctrls	OK	15.6849	47.8325	1.60862	2.52264	0.0037	0.0244352
XLOC_020468	XLOC_020468	TRPV1	chr17:3468742-3500392	s202	Ctrls	OK	3.54536	10.8382	1.61212	2.48799	0.00535	0.0320726
XLOC_046686	XLOC_046686	NFIB	chr9:14081841-14398982	s202	Ctrls	OK	6.32161	19.3876	1.61677	2.79114	0.00225	0.0168074
XLOC_006906	XLOC_006906	OAT	chr10:126085871-126107545	s202	Ctrls	OK	34.5706	106.062	1.61729	2.75238	0.00265	0.0190511
XLOC_046304	XLOC_046304	SNX30	chr9:115513117-115637267	s202	Ctrls	OK	2.73453	8.40331	1.61967	2.3926	0.0034	0.0231221
XLOC_041394	XLOC_041394	LMTK2	chr7:97736196-97838945	s202	Ctrls	OK	5.59876	17.2212	1.621	2.77425	0.00185	0.014432
XLOC_028331	XLOC_028331	COMMD7	chr20:31290492-31331814	s202	Ctrls	OK	16.1463	49.7371	1.62312	2.6072	0.00185	0.014432
XLOC_052385	XLOC_052385	GABRA3	chrX:151307354-151620337	s202	Ctrls	OK	6.23623	19.2354	1.62502	2.57683	0.00295	0.0206552
XLOC_028653	XLOC_028653	UCKL1	chr20:62571185-62587769	s202	Ctrls	OK	18.6145	57.5621	1.62869	2.55889	0.00455	0.0284161
XLOC_022429	XLOC_022429	SPINT2	chr19:38755097-38783253	s202	Ctrls	OK	15.2754	47.3232	1.63134	2.58123	0.0029	0.0203841
XLOC_030361	XLOC_030361	PLCL2	chr3:16844158-17132094	s202	Ctrls	OK	4.08459	12.6588	1.63188	2.55931	0.00475	0.0292426
XLOC_004715	XLOC_004715	C1orf198	chr1:230972864-231005335	s202	Ctrls	OK	9.31329	28.8878	1.6331	2.72644	0.0033	0.0225888
XLOC_024530	XLOC_024530	AC005035.1	chr2:102508954-102511150	s202	Ctrls	OK	27.2519	84.9713	1.64062	3.04767	0.0028	0.0198425
XLOC_043039	XLOC_043039	PTN	chr7:136912087-137028611	s202	Ctrls	OK	22.0779	68.923	1.64238	2.85001	0.0013	0.0110709
XLOC_018040	XLOC_018040	GPT2	chr16:46918289-46965209	s202	Ctrls	OK	9.25376	28.9505	1.64548	2.66803	0.00205	0.0156185
XLOC_023359	XLOC_023359	SIRT2	chr19:39369196-39390502	s202	Ctrls	OK	29.6545	92.7978	1.64584	2.31727	0.0044	0.0277231
XLOC_038198	XLOC_038198	SOX4	chr6:21593971-21598847	s202	Ctrls	OK	22.713	71.411	1.65263	2.35992	0.0091	0.0480238
XLOC_045373	XLOC_045373	ST3GAL1	chr8:134467090-134584183	s202	Ctrls	OK	6.6498	20.9498	1.65555	2.17651	0.00425	0.0269573
XLOC_022078	XLOC_022078	ANGPTL4	chr19:8429010-8439257	s202	Ctrls	OK	5.56436	17.5373	1.65613	2.23058	0.00895	0.0473452
XLOC_006716	XLOC_006716	ARHGAP19,SLIT1	chr10:98757794-99052413	s202	Ctrls	OK	17.8406	56.3183	1.65844	1.97582	0.008	0.0436433
XLOC_020969	XLOC_020969	CCDC56	chr17:40949652-40950704	s202	Ctrls	OK	39.7661	125.681	1.66016	3.49312	0.0024	0.0175779
XLOC_028644	XLOC_028644	KCNQ2	chr20:62037541-62103993	s202	Ctrls	OK	11.3038	35.7333	1.66046	2.7221	0.0057	0.0336934
XLOC_050557	XLOC_050557	PPP1R3F	chrX:49126305-49157929	s202	Ctrls	OK	4.49736	14.2473	1.66354	2.24981	0.00845	0.0453762
XLOC_004000	XLOC_004000	UBQLN4	chr1:156005091-156023585	s202	Ctrls	OK	11.3385	35.9551	1.66497	2.67567	0.0031	0.0214861
XLOC_051127	XLOC_051127	SLC25A14	chrX:129473873-129507335	s202	Ctrls	OK	10.4239	33.1305	1.66826	2.53661	0.00665	0.0378247
XLOC_050254	XLOC_050254	STS	chrX:7137496-7272851	s202	Ctrls	OK	1.56403	4.97129	1.66835	2.50641	0.00895	0.0473452
XLOC_038670	XLOC_038670	PAQR8	chr6:52226218-52272575	s202	Ctrls	OK	4.9432	15.7686	1.67354	2.61516	0.0029	0.0203841
XLOC_022261	XLOC_022261	MAST3	chr19:18208602-18262499	s202	Ctrls	OK	7.28166	23.3581	1.68158	2.92163	0.00225	0.0168074
XLOC_007159	XLOC_007159	TUB	chr11:8040790-8190602	s202	Ctrls	OK	19.327	61.9994	1.68164	2.48212	0.00725	0.0404961
XLOC_023589	XLOC_023589	LRRC4B	chr19:51020148-51071302	s202	Ctrls	OK	17.3502	56.0718	1.69232	2.45518	0.00135	0.0113749
XLOC_041641	XLOC_041641	AHCYL2	chr7:128864863-129070052	s202	Ctrls	OK	9.71551	31.4596	1.69514	2.29104	0.0065	0.0371309
XLOC_024292	XLOC_024292	POLE4	chr2:75185618-75197255	s202	Ctrls	OK	23.9862	77.682	1.69538	2.32914	0.00935	0.0490179
XLOC_038129	XLOC_038129	C6orf228	chr6:11094038-11138964	s202	Ctrls	OK	7.40009	23.9715	1.6957	3.06555	0.00195	0.0149656
XLOC_024807	XLOC_024807	AC093838.4.1	chr2:132250385-132279145	s202	Ctrls	OK	10.0275	32.5601	1.69914	2.52519	0.00405	0.0260713
XLOC_001418	XLOC_001418	PLEKHO1	chr1:150121372-150136916	s202	Ctrls	OK	14.8053	48.1502	1.70143	2.26009	0.00515	0.031127
XLOC_019204	XLOC_019204	CMTM4	chr16:66648652-66730610	s202	Ctrls	OK	10.2082	33.1993	1.70143	2.46639	0.00425	0.0269573
XLOC_011815	XLOC_011815	RNF41	chr12:56598284-56615737	s202	Ctrls	OK	14.0122	45.7116	1.70588	2.66457	0.0026	0.0187662
XLOC_021041	XLOC_021041	OSBPL7	chr17:45884732-45899200	s202	Ctrls	OK	4.55012	14.8592	1.70738	2.55009	0.0035	0.0236565
XLOC_029724	XLOC_029724	FAM19A5	chr22:48885271-49246724	s202	Ctrls	OK	11.6175	37.973	1.70867	2.63186	0.0018	0.0141418
XLOC_023920	XLOC_023920	EFR3B	chr2:25264998-25378243	s202	Ctrls	OK	3.69497	12.0886	1.71001	2.53772	0.00385	0.025142
XLOC_019943	XLOC_019943	RAPGEFL1	chr17:38333262-38351906	s202	Ctrls	OK	19.1447	62.6389	1.71012	2.56639	0.00355	0.023897
XLOC_019594	XLOC_019594	ATP1B2	chr17:7554253-7561087	s202	Ctrls	OK	52.3094	172.106	1.71815	2.79656	0.0036	0.024103
XLOC_007439	XLOC_007439	MAPK8IP1	chr11:45907201-45928016	s202	Ctrls	OK	23.6798	78.0138	1.72007	2.5167	0.0038	0.0249795
XLOC_039277	XLOC_039277	SYNJ2	chr6:158402887-158520208	s202	Ctrls	OK	1.67966	5.53734	1.72102	2.14289	0.00585	0.0342542
XLOC_011645	XLOC_011645	ADCY6	chr12:49159974-49182820	s202	Ctrls	OK	11.6881	38.554	1.72184	2.04959	0.00805	0.0438079
XLOC_051345	XLOC_051345	GDI1	chrX:153665265-153671814	s202	Ctrls	OK	127.23	420.007	1.72298	2.33824	0.00825	0.0445791
XLOC_022262	XLOC_022262	PIK3R2	chr19:18263927-18281343	s202	Ctrls	OK	19.3667	63.9454	1.72326	2.04507	0.00755	0.0418894
XLOC_024073	XLOC_024073	EPAS1	chr2:46520805-46613836	s202	Ctrls	OK	7.24343	23.9735	1.7267	2.34408	0.0042	0.0267169
XLOC_003948	XLOC_003948	CRTC2	chr1:153920144-153931101	s202	Ctrls	OK	20.8603	69.0566	1.72702	2.96984	0.0044	0.0277231
XLOC_034029	XLOC_034029	GLRB	chr4:157997208-158093242	s202	Ctrls	OK	8.52341	28.23	1.72773	2.63675	0.0021	0.0159505
XLOC_012306	XLOC_012306	WSB2	chr12:118451392-118500235	s202	Ctrls	OK	58.7906	194.834	1.72859	2.85445	0.0023	0.017021
XLOC_022278	XLOC_022278	SLC25A42	chr19:19174802-19223704	s202	Ctrls	OK	5.45763	18.121	1.73132	2.95699	0.00445	0.0279231
XLOC_006781	XLOC_006781	ACTR1A	chr10:104221148-104262482	s202	Ctrls	OK	30.7305	102.547	1.73854	2.45101	0.00585	0.0342542
XLOC_028051	XLOC_028051	OPRL1	chr20:62711525-62731996	s202	Ctrls	OK	2.37024	7.91505	1.73957	2.38615	0.00865	0.0461883
XLOC_041549	XLOC_041549	ST7,ST7-OT4	chr7:116592499-116870157	s202	Ctrls	OK	11.9183	39.9495	1.745	2.25311	0.0029	0.0203841
XLOC_046596	XLOC_046596	MRPL41	chr9:140445650-140447007	s202	Ctrls	OK	26.1007	87.5109	1.74537	3.9544	0.00155	0.0126215
XLOC_020373	XLOC_020373	ENDOV	chr17:78388964-78411886	s202	Ctrls	OK	9.40185	31.5631	1.74722	1.83036	0.00725	0.0404961
XLOC_016117	XLOC_016117	CGNL1	chr15:57668164-57842925	s202	Ctrls	OK	1.10579	3.71245	1.74729	2.11868	0.00695	0.0391725
XLOC_000278	XLOC_000278	OTUD3	chr1:20209005-20239438	s202	Ctrls	OK	5.01644	16.8434	1.74745	2.46967	0.0049	0.0299252
XLOC_014792	XLOC_014792	DHRS1	chr14:24759803-24769039	s202	Ctrls	OK	16.7798	56.4559	1.7504	2.51354	0.0041	0.0262741
XLOC_001539	XLOC_001539	EFNA3,EFNA4,RP11-540D14.8.1	chr1:155036206-155060014	s202	Ctrls	OK	10.8201	36.43	1.75141	2.6444	0.00235	0.0172945
XLOC_021564	XLOC_021564	DCC	chr18:49867157-51062269	s202	Ctrls	OK	0.818393	2.75862	1.75308	2.49918	0.00575	0.0338781
XLOC_040938	XLOC_040938	LINC00265	chr7:39773230-39834216	s202	Ctrls	OK	5.36048	18.1242	1.75748	2.52308	0.0057	0.0336934
XLOC_026419	XLOC_026419	LONRF2	chr2:100889752-100939195	s202	Ctrls	OK	7.1674	24.25	1.75846	3.10732	0.001	0.00907991
XLOC_043436	XLOC_043436	ATP6V1B2	chr8:20054877-20084330	s202	Ctrls	OK	43.0885	146.038	1.76096	2.76588	0.0036	0.024103
XLOC_020156	XLOC_020156	DGKE	chr17:54869273-54946034	s202	Ctrls	OK	2.23234	7.61898	1.77104	2.76731	0.00445	0.0279231
XLOC_037700	XLOC_037700	HBEGF	chr5:139712427-139726216	s202	Ctrls	OK	5.17812	17.6775	1.77142	2.65801	0.0039	0.0253436
XLOC_028650	XLOC_028650	STMN3	chr20:62271060-62284780	s202	Ctrls	OK	36.5645	125.134	1.77496	2.78909	0.0008	0.00758608
XLOC_029484	XLOC_029484	EMID1	chr22:29601839-29655586	s202	Ctrls	OK	8.50554	29.1619	1.77761	2.52887	0.0015	0.0122848
XLOC_024505	XLOC_024505	INPP4A	chr2:99061316-99207496	s202	Ctrls	OK	9.54359	32.7608	1.77937	2.60973	0.0028	0.0198425
XLOC_022425	XLOC_022425	ZNF540	chr19:38085730-38105000	s202	Ctrls	OK	2.89098	9.9328	1.78064	2.58452	0.00565	0.0334874
XLOC_040879	XLOC_040879	AQP1,FAM188B,INMT,INMT-FAM188B,RP5-877J2.1.1	chr7:30692199-30965131	s202	Ctrls	OK	5.20123	17.8714	1.78073	2.34308	0.00605	0.0351664
XLOC_018394	XLOC_018394	CMIP	chr16:81478774-81745173	s202	Ctrls	OK	24.7586	85.3977	1.78627	2.27215	0.0071	0.0397812
XLOC_000359	XLOC_000359	MAN1C1	chr1:25943958-26112698	s202	Ctrls	OK	5.42276	18.7217	1.78761	2.33511	0.0054	0.032275
XLOC_002009	XLOC_002009	SHISA4	chr1:201857807-201861434	s202	Ctrls	OK	13.8067	47.8712	1.79379	2.59404	0.00325	0.0223234
XLOC_020548	XLOC_020548	PER1,VAMP2	chr17:8043808-8066864	s202	Ctrls	OK	110.128	382.174	1.79504	2.66454	0.00505	0.0306624
XLOC_019233	XLOC_019233	GFOD2	chr16:67708435-67753324	s202	Ctrls	OK	7.02228	24.3792	1.79564	2.97275	0.00365	0.0243803
XLOC_039150	XLOC_039150	HECA	chr6:139456248-139560442	s202	Ctrls	OK	4.92268	17.1056	1.79695	3.34088	0.0016	0.0129439
XLOC_022938	XLOC_022938	GNG7	chr19:2511217-2702746	s202	Ctrls	OK	6.94401	24.1347	1.79727	2.84381	0.001	0.00907991
XLOC_025515	XLOC_025515	ATG16L1	chr2:234118696-234204320	s202	Ctrls	OK	10.6119	36.8852	1.79736	2.52791	0.00265	0.0190511
XLOC_008917	XLOC_008917	C1QTNF4	chr11:47611215-47616211	s202	Ctrls	OK	10.6994	37.1923	1.79747	2.3715	0.00255	0.0184657
XLOC_000258	XLOC_000258	ARHGEF10L	chr1:17866329-18024369	s202	Ctrls	OK	7.22611	25.1366	1.7985	2.45554	0.00335	0.0228759
XLOC_008464	XLOC_008464	HRAS	chr11:532241-537287	s202	Ctrls	OK	18.9652	66.0166	1.79947	2.4777	0.00165	0.0132513
XLOC_021097	XLOC_021097	PPP1R9B	chr17:48211103-48227991	s202	Ctrls	OK	21.3696	74.4098	1.79993	2.19946	0.00385	0.025142
XLOC_041889	XLOC_041889	ATP6V0E2	chr7:149564785-149577787	s202	Ctrls	OK	50.1217	174.613	1.80066	2.23529	0.008	0.0436433
XLOC_004899	XLOC_004899	SH3BP5L	chr1:249104647-249120832	s202	Ctrls	OK	9.43527	33.0175	1.80709	2.54173	0.00275	0.0195719
XLOC_004735	XLOC_004735	PCNXL2	chr1:233119880-233431473	s202	Ctrls	OK	9.29799	32.5927	1.80956	1.70282	0.0086	0.0460202
XLOC_019439	XLOC_019439	SLC7A5	chr16:87863628-87903094	s202	Ctrls	OK	13.9167	48.8162	1.81055	3.04531	0.001	0.00907991
XLOC_018664	XLOC_018664	RP11-297M9.2.1	chr16:9847271-9851895	s202	Ctrls	OK	3.69222	12.9998	1.81593	2.70041	0.004	0.0258079
XLOC_001661	XLOC_001661	TOMM40L	chr1:161195792-161208092	s202	Ctrls	OK	4.44807	15.6678	1.81655	2.25722	0.0039	0.0253436
XLOC_002517	XLOC_002517	C1orf159	chr1:1017197-1051741	s202	Ctrls	OK	5.80966	20.4796	1.81766	1.90152	0.00545	0.0325055
XLOC_008304	XLOC_008304	OAF	chr11:120081474-120101001	s202	Ctrls	OK	2.79351	9.8488	1.81787	2.58188	0.0093	0.048833
XLOC_037610	XLOC_037610	2013-09-08	chr5:132083136-132142933	s202	Ctrls	OK	16.0556	56.7097	1.82052	2.15366	0.00775	0.0426304
XLOC_005922	XLOC_005922	PTPRE	chr10:129705324-129884119	s202	Ctrls	OK	4.04561	14.3238	1.82399	2.37868	0.00135	0.0113749
XLOC_018886	XLOC_018886	RP11-347C12.1.1	chr16:30234229-30346695	s202	Ctrls	OK	5.13081	18.208	1.82732	2.30821	0.0085	0.0455832
XLOC_004081	XLOC_004081	KCNJ10	chr1:160007256-160049611	s202	Ctrls	OK	3.74141	13.2856	1.82821	2.63497	0.00235	0.0172945
XLOC_052139	XLOC_052139	2013-09-06	chrX:118749686-118827333	s202	Ctrls	OK	13.5068	48.008	1.82959	2.9884	0.0014	0.0116579
XLOC_001457	XLOC_001457	SNX27	chr1:151584513-151671567	s202	Ctrls	OK	9.22579	32.7931	1.82965	3.00027	0.00145	0.0119789
XLOC_036743	XLOC_036743	BRD9,ZDHHC11,ZDHHC11B	chr5:710470-919472	s202	Ctrls	OK	22.8235	81.2398	1.83167	2.32993	0.0037	0.0244352
XLOC_003107	XLOC_003107	ZSWIM5	chr1:45482070-45771881	s202	Ctrls	OK	3.25774	11.663	1.83999	2.88788	0.0018	0.0141418
XLOC_019301	XLOC_019301	PHLPP2	chr16:71657610-71758604	s202	Ctrls	OK	2.65906	9.52298	1.8405	2.84483	0.00145	0.0119789
XLOC_030694	XLOC_030694	PXK	chr3:58318606-58411748	s202	Ctrls	OK	7.58726	27.1798	1.84088	2.42303	0.0034	0.0231221
XLOC_032012	XLOC_032012	MON1A	chr3:49924434-49967606	s202	Ctrls	OK	4.26146	15.2699	1.84127	2.29791	0.0051	0.0308905
XLOC_022397	XLOC_022397	APLP1	chr19:36359137-36370699	s202	Ctrls	OK	52.4546	188.162	1.84283	2.85717	0.00055	0.00572905
XLOC_034408	XLOC_034408	CCDC149	chr4:24807738-24981826	s202	Ctrls	OK	3.80195	13.6576	1.84489	2.34092	0.0087	0.0463309
XLOC_022348	XLOC_022348	KCTD15	chr19:34287750-34306668	s202	Ctrls	OK	7.23655	26.0317	1.84689	3.04808	0.00065	0.00642408
XLOC_007776	XLOC_007776	PACS1	chr11:65837833-66012218	s202	Ctrls	OK	19.4403	70.0467	1.84927	2.7472	0.00185	0.014432
XLOC_025350	XLOC_025350	RP11-566E18.3.1	chr2:217081767-217084915	s202	Ctrls	OK	6.6604	24.0065	1.84974	3.27309	0.00205	0.0156185
XLOC_023324	XLOC_023324	ZNF461	chr19:37128282-37157743	s202	Ctrls	OK	4.50236	16.238	1.85062	2.21927	0.0084	0.0451687
XLOC_041237	XLOC_041237	CLIP2	chr7:73703802-73820273	s202	Ctrls	OK	12.6682	45.6967	1.85088	2.69785	0.0016	0.0129439
XLOC_004405	XLOC_004405	CSRP1	chr1:201452657-201502736	s202	Ctrls	OK	17.3996	62.8339	1.85249	2.60935	0.00165	0.0132513
XLOC_023532	XLOC_023532	PLA2G4C	chr19:48551099-48614109	s202	Ctrls	OK	2.36373	8.53935	1.85306	2.46754	0.00635	0.0364625
XLOC_022173	XLOC_022173	NFIX	chr19:13106583-13209610	s202	Ctrls	OK	19.0974	69.0432	1.85412	2.85995	0.0013	0.0110709
XLOC_007806	XLOC_007806	ANKRD13D	chr11:67056017-67069956	s202	Ctrls	OK	18.3555	66.3976	1.85492	2.7214	0.0018	0.0141418
XLOC_024662	XLOC_024662	RABL2A	chr2:114384805-114400973	s202	Ctrls	OK	10.0718	36.4687	1.85634	2.62854	0.00415	0.0265006
XLOC_025908	XLOC_025908	SLC8A1	chr2:40146832-40838193	s202	Ctrls	OK	2.66591	9.66989	1.85887	2.56256	0.00055	0.00572905
XLOC_018393	XLOC_018393	MIR4720	chr16:81416873-81424489	s202	Ctrls	OK	2.90371	10.5335	1.85901	2.92855	0.0023	0.017021
XLOC_020542	XLOC_020542	KCNAB3	chr17:7825176-7832753	s202	Ctrls	OK	2.87007	10.4432	1.8634	2.767	0.00705	0.0395903
XLOC_022036	XLOC_022036	HSD11B1L	chr19:5681034-5688532	s202	Ctrls	OK	13.5271	49.3266	1.86651	2.47877	0.0035	0.0236565
XLOC_011749	XLOC_011749	SPRYD3	chr12:53458387-53473204	s202	Ctrls	OK	16.9913	61.983	1.86708	3.18074	0.0006	0.00610906
XLOC_051674	XLOC_051674	PCSK1N	chrX:48689503-48694035	s202	Ctrls	OK	58.4918	214.735	1.87625	2.75645	0.00035	0.00400446
XLOC_040302	XLOC_040302	TSPYL4	chr6:116571150-116575261	s202	Ctrls	OK	20.7732	76.3482	1.87787	3.31382	0.00105	0.00941355
XLOC_044509	XLOC_044509	LONRF1	chr8:12579402-12613582	s202	Ctrls	OK	7.44196	27.3596	1.87829	2.77853	0.00235	0.0172945
XLOC_017525	XLOC_017525	RAB40C	chr16:639356-679272	s202	Ctrls	OK	7.81011	28.7303	1.87916	2.66141	0.0011	0.00977368
XLOC_014771	XLOC_014771	SLC22A17	chr14:23815514-23822121	s202	Ctrls	OK	51.301	188.807	1.87985	3.01246	0.0008	0.00758608
XLOC_005670	XLOC_005670	RP11-175O19.4.1	chr10:98752206-98755716	s202	Ctrls	OK	2.14881	7.91725	1.88146	2.9254	0.00685	0.0386967
XLOC_016911	XLOC_016911	GATM	chr15:45653321-45694525	s202	Ctrls	OK	14.8054	54.707	1.8856	2.8499	0.00125	0.010751
XLOC_027511	XLOC_027511	SMOX	chr20:4101626-4168394	s202	Ctrls	OK	10.6077	39.2664	1.88818	2.44938	0.00065	0.00642408
XLOC_027697	XLOC_027697	DNMT3B	chr20:31350190-31397162	s202	Ctrls	OK	1.4992	5.55247	1.88894	2.32565	0.00685	0.0386967
XLOC_016976	XLOC_016976	MYO5A	chr15:52599479-52821247	s202	Ctrls	OK	7.2478	26.8517	1.8894	3.02551	0.00055	0.00572905
XLOC_043206	XLOC_043206	RHEB	chr7:151163097-151217206	s202	Ctrls	OK	14.6305	54.4741	1.89659	3.16024	0.0014	0.0116579
XLOC_002159	XLOC_002159	PROX1	chr1:213992977-214214853	s202	Ctrls	OK	0.781075	2.91607	1.90049	2.07189	0.00885	0.0469036
XLOC_001072	XLOC_001072	RP4-788L13.1.1	chr1:99729508-99775146	s202	Ctrls	OK	17.1857	64.187	1.90107	3.19788	0.0006	0.00610906
XLOC_021276	XLOC_021276	HN1	chr17:73131342-73150778	s202	Ctrls	OK	53.2895	199.032	1.90108	2.85393	0.0019	0.0147067
XLOC_026507	XLOC_026507	AC079922.2.1	chr2:113379385-113379744	s202	Ctrls	OK	26.0506	97.3001	1.90113	4.4733	0.00935	0.0490179
XLOC_046839	XLOC_046839	CNTFR	chr9:34551429-34590121	s202	Ctrls	OK	12.9368	48.5311	1.90743	3.22559	0.00055	0.00572905
XLOC_016378	XLOC_016378	FAM108C1	chr15:80972024-81047962	s202	Ctrls	OK	8.04294	30.2296	1.91017	2.70642	0.00165	0.0132513
XLOC_021849	XLOC_021849	MYO5B	chr18:47349155-47721451	s202	Ctrls	OK	1.07152	4.03467	1.91278	2.28614	0.0071	0.0397812
XLOC_040269	XLOC_040269	FYN	chr6:111981534-112194655	s202	Ctrls	OK	29.095	109.649	1.91404	2.51825	0.0016	0.0129439
XLOC_011118	XLOC_011118	GLT1D1	chr12:129337971-129469509	s202	Ctrls	OK	3.64805	13.7571	1.91498	2.89525	0.0018	0.0141418
XLOC_023791	XLOC_023791	SOX11	chr2:5832798-5847791	s202	Ctrls	OK	10.2148	38.6242	1.91884	2.7885	0.0057	0.0336934
XLOC_024185	XLOC_024185	SLC1A4	chr2:65215610-65250999	s202	Ctrls	OK	8.51225	32.2851	1.92325	2.81374	0.0017	0.0135543
XLOC_042061	XLOC_042061	THSD7A	chr7:11232992-11871824	s202	Ctrls	OK	0.96577	3.67179	1.92673	2.05832	0.00325	0.0223234
XLOC_020852	XLOC_020852	PIP4K2B	chr17:36921941-36956158	s202	Ctrls	OK	28.129	106.945	1.92674	3.10571	0.00125	0.010751
XLOC_051086	XLOC_051086	RP11-349N19.2.1	chrX:122648323-122648723	s202	Ctrls	OK	21.2572	80.9384	1.92888	4.25687	0.00765	0.0422909
XLOC_050277	XLOC_050277	FRMPD4	chrX:12156584-12742642	s202	Ctrls	OK	1.88456	7.18255	1.93027	3.04229	0.0015	0.0122848
XLOC_026420	XLOC_026420	CHST10	chr2:101008326-101034118	s202	Ctrls	OK	10.839	41.3933	1.93316	3.06107	0.00045	0.00488975
XLOC_033166	XLOC_033166	HSP90AB2P	chr4:13338102-13339926	s202	Ctrls	OK	4.87499	18.6321	1.93432	2.44643	0.00595	0.0346865
XLOC_032639	XLOC_032639	SIAH2	chr3:150458913-150481264	s202	Ctrls	OK	11.0001	42.0686	1.93523	3.10723	0.0005	0.00529702
XLOC_004082	XLOC_004082	IGSF8	chr1:160061129-160068733	s202	Ctrls	OK	23.4323	90.3293	1.9467	3.17288	5e-05	0.000800523
XLOC_011657	XLOC_011657	LMBR1L	chr12:49490918-49504683	s202	Ctrls	OK	35.4069	136.804	1.95001	2.33969	0.0035	0.0236565
XLOC_036464	XLOC_036464	GPX3	chr5:150400123-150408554	s202	Ctrls	OK	5.8077	22.4819	1.95273	2.65325	0.00175	0.0138365
XLOC_039767	XLOC_039767	C6orf1	chr6:34214156-34217247	s202	Ctrls	OK	18.3082	70.9173	1.95365	2.89019	0.002	0.015302
XLOC_007736	XLOC_007736	PPP2R5B	chr11:64685024-64703360	s202	Ctrls	OK	18.667	72.3175	1.95386	3.02042	0.00165	0.0132513
XLOC_001320	XLOC_001320	PEX11B	chr1:145516251-145523730	s202	Ctrls	OK	19.3288	74.8852	1.95393	3.36506	0.00045	0.00488975
XLOC_035110	XLOC_035110	TBC1D9	chr4:141541918-141677274	s202	Ctrls	OK	4.59576	17.8088	1.95422	3.04747	0.001	0.00907991
XLOC_023979	XLOC_023979	LBH	chr2:30454396-30546596	s202	Ctrls	OK	11.081	42.9506	1.95459	3.01632	0.00075	0.00720819
XLOC_012001	XLOC_012001	CSRP2	chr12:77252002-77274132	s202	Ctrls	OK	42.1387	163.526	1.9563	1.79677	0.00835	0.044985
XLOC_047541	XLOC_047541	AK1,ST6GALNAC6	chr9:130628758-130667687	s202	Ctrls	OK	40.0797	155.588	1.95679	2.2014	0.00445	0.0279231
XLOC_046119	XLOC_046119	GADD45G	chr9:92219927-92221470	s202	Ctrls	OK	5.30007	20.645	1.96171	2.28734	0.00635	0.0364625
XLOC_001147	XLOC_001147	CYB561D1	chr1:110036673-110045554	s202	Ctrls	OK	3.86622	15.0866	1.96427	2.75404	0.00115	0.0100961
XLOC_009435	XLOC_009435	FAM181B	chr11:82443052-82444906	s202	Ctrls	OK	3.14095	12.2602	1.96471	3.00067	0.0059	0.0344962
XLOC_017703	XLOC_017703	MKL2	chr16:14173144-14360629	s202	Ctrls	OK	8.67233	33.8523	1.96476	2.21007	0.0089	0.0471183
XLOC_017609	XLOC_017609	PAQR4	chr16:3014159-3030505	s202	Ctrls	OK	5.3343	20.8653	1.96774	2.94837	0.0055	0.0327448
XLOC_022257	XLOC_022257	KCNN1	chr19:18062110-18110893	s202	Ctrls	OK	4.92377	19.2777	1.9691	2.64882	0.0033	0.0225888
XLOC_024903	XLOC_024903	LYPD6	chr2:150186498-150330662	s202	Ctrls	OK	1.33245	5.23063	1.9729	2.38651	0.0036	0.024103
XLOC_043590	XLOC_043590	ZNF703	chr8:37553268-37557537	s202	Ctrls	OK	3.08692	12.1444	1.97605	2.65327	0.00335	0.0228759
XLOC_020989	XLOC_020989	MPP3	chr17:41878166-41910538	s202	Ctrls	OK	5.29351	20.8441	1.97734	2.38227	0.00675	0.0381969
XLOC_043499	XLOC_043499	PTK2B	chr8:27168998-27316903	s202	Ctrls	OK	7.87069	31.0257	1.9789	2.1744	0.00215	0.0162065
XLOC_011004	XLOC_011004	PEBP1	chr12:118501397-118583389	s202	Ctrls	OK	106.025	418.316	1.98018	2.55275	0.00225	0.0168074
XLOC_044995	XLOC_044995	HEY1	chr8:80676244-80680098	s202	Ctrls	OK	7.31817	28.9395	1.98349	2.65385	0.0018	0.0141418
XLOC_040621	XLOC_040621	C6orf124	chr6:168224555-168227466	s202	Ctrls	OK	6.14224	24.4202	1.99124	2.11104	0.00575	0.0338781
XLOC_007445	XLOC_007445	CREB3L1	chr11:46299211-46342972	s202	Ctrls	OK	1.90814	7.59598	1.99307	2.02095	0.0073	0.0406954
XLOC_030250	XLOC_030250	RABL2B	chr22:51195375-51239737	s202	Ctrls	OK	12.5056	49.783	1.99308	2.2557	0.00675	0.0381969
XLOC_047136	XLOC_047136	PRUNE2	chr9:79226291-79521003	s202	Ctrls	OK	7.35696	29.2901	1.99323	2.21702	0.0062	0.0358392
XLOC_052205	XLOC_052205	ZDHHC9	chrX:128937263-128977885	s202	Ctrls	OK	7.36725	29.4612	1.99962	2.65388	0.0018	0.0141418
XLOC_045370	XLOC_045370	SLA	chr8:133879202-134147147	s202	Ctrls	OK	16.9405	67.9402	2.00379	2.6503	0.0017	0.0135543
XLOC_020495	XLOC_020495	CAMTA2	chr17:4871286-4890972	s202	Ctrls	OK	9.03149	36.223	2.00387	3.52161	0.0003	0.00353406
XLOC_007210	XLOC_007210	ARNTL	chr11:13298198-13408813	s202	Ctrls	OK	7.6076	30.5192	2.0042	1.95386	0.00475	0.0292426
XLOC_032999	XLOC_032999	BDH1	chr3:197236653-197300194	s202	Ctrls	OK	6.92982	27.857	2.00715	2.62323	0.00445	0.0279231
XLOC_007151	XLOC_007151	PPFIBP2	chr11:7534528-7678358	s202	Ctrls	OK	5.2543	21.1307	2.00777	1.73219	0.0045	0.0281835
XLOC_000202	XLOC_000202	PRDM2	chr1:14026692-14151560	s202	Ctrls	OK	11.6174	46.7913	2.00996	2.80381	0.00135	0.0113749
XLOC_021128	XLOC_021128	MMD	chr17:53469973-53499341	s202	Ctrls	OK	13.5879	54.7682	2.01102	3.86461	0.00035	0.00400446
XLOC_019910	XLOC_019910	DUSP14	chr17:35849936-35873603	s202	Ctrls	OK	8.08331	32.6096	2.01228	2.89128	0.0019	0.0147067
XLOC_046836	XLOC_046836	C9orf25	chr9:34398181-34520982	s202	Ctrls	OK	13.3226	53.9669	2.0182	3.53974	0.0002	0.00256581
XLOC_034870	XLOC_034870	PPP3CA	chr4:101944565-102270040	s202	Ctrls	OK	10.8642	44.0406	2.01925	2.70527	0.00195	0.0149656
XLOC_010384	XLOC_010384	SCN8A	chr12:51984049-52202297	s202	Ctrls	OK	2.26227	9.17214	2.01949	1.78436	0.00875	0.0465348
XLOC_005938	XLOC_005938	DPYSL4	chr10:134000403-134019266	s202	Ctrls	OK	12.0283	48.8046	2.02059	2.69209	0.00135	0.0113749
XLOC_015336	XLOC_015336	ITPK1	chr14:93403258-93582665	s202	Ctrls	OK	17.0246	69.5034	2.02946	3.55667	5e-05	0.000800523
XLOC_034313	XLOC_034313	RP11-774O3.3.1	chr4:8357037-8359103	s202	Ctrls	OK	3.68386	15.0766	2.03302	3.17075	0.00445	0.0279231
XLOC_001533	XLOC_001533	CHRNB2	chr1:154540256-154552502	s202	Ctrls	OK	2.2916	9.39603	2.0357	3.12839	0.0014	0.0116579
XLOC_013363	XLOC_013363	PCDH20	chr13:61983990-62002220	s202	Ctrls	OK	1.52722	6.26213	2.03575	2.49909	0.0037	0.0244352
XLOC_030048	XLOC_030048	RBFOX2	chr22:36134782-36424473	s202	Ctrls	OK	37.8716	155.328	2.03613	2.53295	0.00575	0.0338781
XLOC_004401	XLOC_004401	LAD1,TNNT2	chr1:201328135-201368736	s202	Ctrls	OK	0.534647	2.1929	2.03618	0.515305	0.00065	0.00642408
XLOC_047093	XLOC_047093	APBA1	chr9:72045203-72287222	s202	Ctrls	OK	5.53907	22.7879	2.04055	3.09461	0.0006	0.00610906
XLOC_040778	XLOC_040778	HDAC9	chr7:18126571-19036993	s202	Ctrls	OK	4.28276	17.6544	2.04342	1.71249	0.00885	0.0469036
XLOC_012151	XLOC_012151	GNPTAB	chr12:102139274-102224716	s202	Ctrls	OK	11.391	47.0165	2.04528	2.54982	0.0034	0.0231221
XLOC_022106	XLOC_022106	PDE4A	chr19:10527448-10580305	s202	Ctrls	OK	4.14569	17.152	2.04869	3.13126	0.0003	0.00353406
XLOC_027754	XLOC_027754	EPB41L1	chr20:34679425-34820721	s202	Ctrls	OK	14.5227	60.1813	2.05101	2.75695	0.0009	0.00832395
XLOC_029248	XLOC_029248	ZNF74	chr22:20748404-20762745	s202	Ctrls	OK	4.63689	19.2259	2.05182	2.86676	0.00035	0.00400446
XLOC_008471	XLOC_008471	DEAF1	chr11:644232-727727	s202	Ctrls	OK	18.5658	77.0212	2.05261	2.21047	0.0056	0.0332505
XLOC_042768	XLOC_042768	C7orf61,TSC22D4	chr7:100054237-100076902	s202	Ctrls	OK	12.9713	53.8843	2.05454	3.59403	0.00035	0.00400446
XLOC_019576	XLOC_019576	NLGN2	chr17:7311501-7323179	s202	Ctrls	OK	17.691	73.9128	2.06281	3.66846	0.0003	0.00353406
XLOC_051704	XLOC_051704	NUDT11	chrX:51232862-51239448	s202	Ctrls	OK	9.20283	38.5041	2.06486	3.73777	0.00085	0.00795026
XLOC_041985	XLOC_041985	ADAP1,COX19	chr7:937539-1015235	s202	Ctrls	OK	10.5192	44.0276	2.06539	2.404	0.0007	0.00682663
XLOC_042379	XLOC_042379	VOPP1	chr7:55503748-55640681	s202	Ctrls	OK	12.3796	51.9876	2.0702	3.32211	0.0005	0.00529702
XLOC_027504	XLOC_027504	HSPA12B	chr20:3713313-3733758	s202	Ctrls	OK	0.815323	3.42894	2.07232	2.21122	0.00935	0.0490179
XLOC_000461	XLOC_000461	TINAGL1	chr1:32042115-32053288	s202	Ctrls	OK	1.92262	8.09201	2.07343	1.89245	0.00265	0.0190511
XLOC_003055	XLOC_003055	HIVEP3	chr1:41972035-42501596	s202	Ctrls	OK	2.56594	10.813	2.07521	2.14784	0.00835	0.044985
XLOC_004732	XLOC_004732	SIPA1L2	chr1:232533710-232697304	s202	Ctrls	OK	6.21468	26.2193	2.07687	2.80268	0.00115	0.0100961
XLOC_009863	XLOC_009863	ADAMTS8	chr11:130274819-130298888	s202	Ctrls	OK	1.30333	5.50408	2.0783	2.42451	0.0072	0.0402508
XLOC_018483	XLOC_018483	SPIRE2	chr16:89884586-89937727	s202	Ctrls	OK	7.20931	30.4513	2.07857	2.45161	0.00255	0.0184657
XLOC_027156	XLOC_027156	KLF7	chr2:207938860-208031991	s202	Ctrls	OK	6.77156	28.6155	2.07923	2.30274	0.00655	0.0373414
XLOC_047677	XLOC_047677	RNF208	chr9:140114706-140116033	s202	Ctrls	OK	7.16888	30.3114	2.08004	2.75486	0.003	0.0209389
XLOC_031526	XLOC_031526	ST6GAL1	chr3:186648273-186796341	s202	Ctrls	OK	9.45019	40.0072	2.08185	2.34924	0.0031	0.0214861
XLOC_044447	XLOC_044447	MIR124-1,RP11-403C10.2.1	chr8:9757573-9762876	s202	Ctrls	OK	61.0385	258.56	2.08271	2.96012	0.00215	0.0162065
XLOC_051798	XLOC_051798	ARHGEF9	chrX:62854846-63005426	s202	Ctrls	OK	12.8506	54.5743	2.08639	3.41977	5e-05	0.000800523
XLOC_006506	XLOC_006506	MICU1	chr10:74127097-74385899	s202	Ctrls	OK	20.1005	85.4645	2.08809	3.67992	5e-05	0.000800523
XLOC_023063	XLOC_023063	FDX1L,ZGLP1	chr19:10415478-10426691	s202	Ctrls	OK	13.3164	56.6959	2.09004	2.88619	0.0015	0.0122848
XLOC_027491	XLOC_027491	EBF4	chr20:2673479-2740754	s202	Ctrls	OK	10.0372	42.794	2.09205	2.89342	0.0004	0.00445852
XLOC_010048	XLOC_010048	GABARAPL1	chr12:10365056-10375727	s202	Ctrls	OK	44.2506	189.015	2.09473	3.23821	0.0004	0.00445852
XLOC_002767	XLOC_002767	KIF17	chr1:20990506-21044510	s202	Ctrls	OK	1.52924	6.53549	2.09548	1.58747	0.0066	0.0375726
XLOC_013254	XLOC_013254	ENOX1	chr13:43787653-44361044	s202	Ctrls	OK	4.01577	17.1714	2.09626	2.94487	0.0012	0.0104065
XLOC_009867	XLOC_009867	RP11-890B15.2.1	chr11:130714085-130737889	s202	Ctrls	OK	1.55648	6.66003	2.09724	2.68159	0.004	0.0258079
XLOC_011698	XLOC_011698	CSRNP2	chr12:51454989-51477447	s202	Ctrls	OK	13.4423	57.5241	2.09739	2.78154	0.00125	0.010751
XLOC_005809	XLOC_005809	RP11-57H14.4.1	chr10:114583248-114587485	s202	Ctrls	OK	2.05734	8.80855	2.09813	3.1318	0.0019	0.0147067
XLOC_034076	XLOC_034076	KLHL2	chr4:165997255-166244308	s202	Ctrls	OK	9.25448	39.63	2.09837	2.8709	0.00545	0.0325055
XLOC_037783	XLOC_037783	PDGFRB	chr5:149493399-149535435	s202	Ctrls	OK	4.38865	18.7936	2.09839	2.74412	0.0014	0.0116579
XLOC_017691	XLOC_017691	SNN	chr16:11762269-11836704	s202	Ctrls	OK	35.3605	151.534	2.09943	3.05471	0.00105	0.00941355
XLOC_020635	XLOC_020635	PLD6	chr17:17104308-17109646	s202	Ctrls	OK	2.11798	9.08683	2.10109	2.75282	0.00315	0.0217719
XLOC_023484	XLOC_023484	RTN2	chr19:45988549-46005768	s202	Ctrls	OK	14.1953	61.0326	2.10417	3.40896	0.00085	0.00795026
XLOC_022587	XLOC_022587	NPAS1	chr19:47524142-47549016	s202	Ctrls	OK	2.61796	11.2727	2.10633	2.39919	0.0058	0.0340919
XLOC_017202	XLOC_017202	ULK3	chr15:75128456-75135687	s202	Ctrls	OK	20.6977	89.1512	2.10679	2.72613	0.00055	0.00572905
XLOC_000026	XLOC_000026	KLHL17	chr1:895966-901095	s202	Ctrls	OK	6.47043	27.8817	2.10739	2.20078	0.00805	0.0438079
XLOC_006991	XLOC_006991	B4GALNT4	chr11:369795-382116	s202	Ctrls	OK	40.0716	173.756	2.11641	2.01945	0.00615	0.0356123
XLOC_047618	XLOC_047618	SLC2A6	chr9:136336216-136344259	s202	Ctrls	OK	2.83441	12.2909	2.11647	2.51492	0.00255	0.0184657
XLOC_052216	XLOC_052216	IGSF1	chrX:130407479-130533677	s202	Ctrls	OK	1.29418	5.6129	2.11671	1.85905	0.00915	0.0482364
XLOC_031394	XLOC_031394	CLDN11	chr3:170136652-170578169	s202	Ctrls	OK	2.56056	11.1377	2.12093	2.36962	0.00915	0.0482364
XLOC_051395	XLOC_051395	RP11-706O15.1.1	chrX:3734597-3761934	s202	Ctrls	OK	5.60513	24.3948	2.12175	2.69677	0.00605	0.0351664
XLOC_001712	XLOC_001712	MGST3	chr1:165600097-165631033	s202	Ctrls	OK	55.6792	243.434	2.12832	3.54271	5e-05	0.000800523
XLOC_027122	XLOC_027122	ICA1L	chr2:203640689-203736708	s202	Ctrls	OK	7.76979	34.0635	2.13228	2.0544	0.00595	0.0346865
XLOC_034297	XLOC_034297	CRMP1	chr4:5712923-5894785	s202	Ctrls	OK	97.2843	426.696	2.13293	2.68807	0.0065	0.0371309
XLOC_041267	XLOC_041267	SRRM3	chr7:75831215-75916605	s202	Ctrls	OK	15.8103	69.4079	2.13424	3.25493	0.0005	0.00529702
XLOC_012835	XLOC_012835	LMO7,UCHL3	chr13:76123618-76434004	s202	Ctrls	OK	15.791	69.3351	2.13448	2.49578	0.0015	0.0122848
XLOC_007778	XLOC_007778	KLC2	chr11:66024764-66035600	s202	Ctrls	OK	12.3804	54.3779	2.13496	3.1307	0.00035	0.00400446
XLOC_028328	XLOC_028328	C20orf112	chr20:31030861-31196695	s202	Ctrls	OK	6.76161	29.6992	2.13498	2.53946	0.00165	0.0132513
XLOC_024653	XLOC_024653	AC016683.6.1,RP11-65I12.1.1	chr2:113969098-114036527	s202	Ctrls	OK	1.74085	7.64779	2.13525	1.85858	0.0031	0.0214861
XLOC_020055	XLOC_020055	NSF	chr17:44668074-44834830	s202	Ctrls	OK	11.1183	48.9429	2.13816	3.0648	0.0012	0.0104065
XLOC_047404	XLOC_047404	SUSD1	chr9:114803064-114937688	s202	Ctrls	OK	2.33935	10.3066	2.13938	2.2292	0.0039	0.0253436
XLOC_002940	XLOC_002940	RP4-811H24.6.1	chr1:32826870-32829913	s202	Ctrls	OK	3.97912	17.5442	2.14047	2.51624	0.0027	0.0193197
XLOC_033673	XLOC_033673	RAP1GDS1	chr4:99172838-99365012	s202	Ctrls	OK	15.3998	68.0728	2.14417	3.44228	5e-05	0.000800523
XLOC_012301	XLOC_012301	TESC	chr12:117476727-117537284	s202	Ctrls	OK	2.25104	9.97317	2.14746	2.05315	0.00525	0.0315778
XLOC_029586	XLOC_029586	KCTD17	chr22:37447778-37459430	s202	Ctrls	OK	14.8059	65.6154	2.14786	3.04136	0.00055	0.00572905
XLOC_040769	XLOC_040769	BZW2	chr7:16685755-16759523	s202	Ctrls	OK	11.585	51.488	2.15198	3.27608	0.0001	0.00146536
XLOC_000630	XLOC_000630	B4GALT2	chr1:44444614-44456840	s202	Ctrls	OK	20.8947	92.8814	2.15226	3.40535	5e-05	0.000800523
XLOC_024895	XLOC_024895	ACVR2A	chr2:148602085-148688393	s202	Ctrls	OK	4.67032	20.7668	2.15268	3.02165	0.0012	0.0104065		ACVR2A
XLOC_026160	XLOC_026160	RAB11FIP5,SFXN5	chr2:73169164-73383849	s202	Ctrls	OK	17.63	78.4015	2.15285	2.24995	0.0041	0.0262741
XLOC_030036	XLOC_030036	LARGE	chr22:33560048-34318829	s202	Ctrls	OK	8.63364	38.4245	2.15399	2.27138	0.0016	0.0129439
XLOC_019101	XLOC_019101	TOX3	chr16:52471916-52581714	s202	Ctrls	OK	3.3398	14.8733	2.15489	2.64006	0.00305	0.0212506
XLOC_007377	XLOC_007377	RP11-698N11.4.1	chr11:35835881-35839557	s202	Ctrls	OK	2.56026	11.4157	2.15666	3.44485	0.00285	0.0201537
XLOC_041323	XLOC_041323	ADAM22	chr7:87563457-87832204	s202	Ctrls	OK	4.223	18.8663	2.15947	2.56089	0.0031	0.0214861
XLOC_000015	XLOC_000015	AC114498.1,AC114498.6,RP5-857K21.10.1,RP5-857K21.11.1,RP5-857K21.14.1,RP5-857K21.6.1,RP5-857K21.7.1	chr1:536815-660287	s202	Ctrls	OK	80.2094	359.071	2.16243	2.73152	0.00165	0.0132513
XLOC_013199	XLOC_013199	SMAD9	chr13:37418967-37494902	s202	Ctrls	OK	2.02395	9.06212	2.16267	3.08168	0.00075	0.00720819		SMAD9
XLOC_014061	XLOC_014061	GPR137C	chr14:53019865-53104431	s202	Ctrls	OK	2.81608	12.6126	2.16311	3.26635	0.00085	0.00795026
XLOC_007796	XLOC_007796	C11orf80,RCE1	chr11:66511921-66614017	s202	Ctrls	OK	17.1216	76.7152	2.16369	2.62296	0.00075	0.00720819
XLOC_030574	XLOC_030574	KLHL18	chr3:47205986-47388306	s202	Ctrls	OK	4.07038	18.2659	2.16592	2.17328	0.00605	0.0351664
XLOC_041398	XLOC_041398	NPTX2	chr7:98246608-98259180	s202	Ctrls	OK	26.319	118.26	2.16779	2.96418	0.0043	0.0272311
[truncated: 1,814 more rows]
[truncated: 11 more columns]
