# Supplementary material for: Whole Exome- and mRNA-Sequencing of an AT/RT Case Reveals Few Somatic Mutations and Several Deregulated Signalling Pathways in the Context of SMARCB1 Deficiency
Source: Biomed Res Int. 2015 Aug 12;2015:862039. doi: 10.1155/2015/862039 (PMC4780067; doi:10.1155/2015/862039)
Supplement: Supplementary file 1 — Supl. Table 1A. Read mapping and coverage data. Exome-seq Data. Supl. Table 1B. Read mapping mRNA-seq data. Supl. Table 2. Germline variants with RNA variants and DE genes indicated. Supl. Table 3. Cuffdiff results, significantly DE genes with BMP-genes indicated. Supl. Table 4. Gene set overlap for up regulated genes. Supl. Table 5. Gene set overlap for down regulated genes. Supl. Table 6. GO for up regulated genes. Supl. Table 7. GO for down regulated genes. Supl. Fig. 1. FPKM values for the two CCDS SMARCB1 transcripts for AT/RT and Controls. NCBI accession nomenclature is used. Supl. Fig. 2. RNA reads alignment at exon 2 of SMARCB1. Genomic region Chr. 22: 24134055- 24134081 is indicated between the two red vertical lines. The yellow region on the top, represents exon 2, with introns on both sides, shown in blue. Aligned paired reads are shown in blue, while single reads are shown in red or green. Dotted lines connect each end of a read, that have been mapped across exon-exon boundaries. [file 862039.f1.zip › 862039 supl table 4 gene set overlap up regul genes.xlsx]

## Sheet: Sheet1
Gene Set Name	# Genes in Gene Set (K)	Description	# Genes in Overlap (k)	k/K	p-value	FDR q-value
REACTOME_IMMUNE_SYSTEM	933	Genes involved in Immune System	108	0.1158	0	0
REACTOME_CELL_CYCLE	421	Genes involved in Cell Cycle	51	0.1211	0	0
REACTOME_CYTOKINE_SIGNALING_IN_IMMUNE_SYSTEM	270	Genes involved in Cytokine Signaling in Immune system	49	0.1815	0	0
REACTOME_INTERFERON_SIGNALING	159	Genes involved in Interferon Signaling	34	0.2138	0	0
PID_CXCR4_PATHWAY	102	CXCR4-mediated signaling events	26	0.2549	0	0
REACTOME_ADAPTIVE_IMMUNE_SYSTEM	539	Genes involved in Adaptive Immune System	58	0.1076	1.11e-16	2.09e-14
REACTOME_CELL_CYCLE_MITOTIC	325	Genes involved in Cell Cycle, Mitotic	44	0.1354	1.11e-16	2.09e-14
REACTOME_HEMOSTASIS	466	Genes involved in Hemostasis	52	0.1116	7.77e-16	1.28e-13
REACTOME_INTERFERON_ALPHA_BETA_SIGNALING	64	Genes involved in Interferon alpha/beta signaling	20	0.3125	1.89e-15	2.77e-13
KEGG_PATHWAYS_IN_CANCER	328	Pathways in cancer	41	0.125	2e-14	2.44e-12
REACTOME_INTERFERON_GAMMA_SIGNALING	63	Genes involved in Interferon gamma signaling	19	0.3016	2.03e-14	2.44e-12
REACTOME_SIGNALING_BY_GPCR	920	Genes involved in Signaling by GPCR	74	0.0804	3.81e-14	4.19e-12
PID_IL12_2PATHWAY	63	IL12-mediated signaling events	18	0.2857	2.81e-13	2.85e-11
REACTOME_GPCR_DOWNSTREAM_SIGNALING	805	Genes involved in GPCR downstream signaling	66	0.082	3.92e-13	3.7e-11
KEGG_REGULATION_OF_ACTIN_CYTOSKELETON	216	Regulation of actin cytoskeleton	31	0.1435	7.57e-13	6.66e-11
KEGG_CELL_ADHESION_MOLECULES_CAMS	134	Cell adhesion molecules (CAMs)	24	0.1791	2.31e-12	1.9e-10
PID_P53DOWNSTREAMPATHWAY	137	Direct p53 effectors	23	0.1679	2.62e-11	2.04e-09
REACTOME_OLFACTORY_SIGNALING_PATHWAY	328	Genes involved in Olfactory Signaling Pathway	36	0.1098	3.47e-11	2.52e-09
REACTOME_DNA_REPLICATION	192	Genes involved in DNA Replication	27	0.1406	3.62e-11	2.52e-09
PID_INTEGRIN1_PATHWAY	66	Beta1 integrin cell surface interactions	16	0.2424	9.09e-11	5.56e-09
PID_TCR_PATHWAY	66	TCR signaling in na&#xef;ve CD4+ T cells	16	0.2424	9.09e-11	5.56e-09
REACTOME_MITOTIC_M_M_G1_PHASES	172	Genes involved in Mitotic M-M/G1 phases	25	0.1453	9.26e-11	5.56e-09
KEGG_FOCAL_ADHESION	201	Focal adhesion	27	0.1343	1.05e-10	6.05e-09
KEGG_P53_SIGNALING_PATHWAY	69	p53 signaling pathway	16	0.2319	1.87e-10	1.03e-08
PID_CD8TCRPATHWAY	53	TCR signaling in na&#xef;ve CD8+ T cells	14	0.2642	3.94e-10	2.08e-08
KEGG_ECM_RECEPTOR_INTERACTION	84	ECM-receptor interaction	17	0.2024	4.98e-10	2.53e-08
PID_E2F_PATHWAY	74	E2F transcription factor network	16	0.2162	5.7e-10	2.78e-08
KEGG_LYSOSOME	121	Lysosome	20	0.1653	6.79e-10	3.2e-08
BIOCARTA_TCRA_PATHWAY	13	Lck and Fyn tyrosine kinases in initiation of TCR Activation	8	0.6154	7.63e-10	3.47e-08
REACTOME_MITOTIC_PROMETAPHASE	87	Genes involved in Mitotic Prometaphase	17	0.1954	8.85e-10	3.89e-08
REACTOME_IMMUNOREGULATORY_INTERACTIONS_BETWEEN_A_LYMPHOID_AND_A_NON_LYMPHOID_CELL	70	Genes involved in Immunoregulatory interactions between a Lymphoid and a non-Lymphoid cell	15	0.2143	2.24e-09	9.53e-08
REACTOME_GENERATION_OF_SECOND_MESSENGER_MOLECULES	27	Genes involved in Generation of second messenger molecules	10	0.3704	3.23e-09	1.33e-07
KEGG_OLFACTORY_TRANSDUCTION	389	Olfactory transduction	36	0.0925	3.79e-09	1.52e-07
KEGG_PRIMARY_IMMUNODEFICIENCY	35	Primary immunodeficiency	11	0.3143	3.93e-09	1.53e-07
KEGG_T_CELL_RECEPTOR_SIGNALING_PATHWAY	108	T cell receptor signaling pathway	18	0.1667	4.18e-09	1.58e-07
PID_CD8TCRDOWNSTREAMPATHWAY	65	Downstream signaling in na&#xef;ve CD8+ T cells	14	0.2154	7.13e-09	2.54e-07
PID_IL4_2PATHWAY	65	IL4-mediated signaling events	14	0.2154	7.13e-09	2.54e-07
KEGG_ARRHYTHMOGENIC_RIGHT_VENTRICULAR_CARDIOMYOPATHY_ARVC	76	Arrhythmogenic right ventricular cardiomyopathy (ARVC)	15	0.1974	7.44e-09	2.58e-07
REACTOME_INTEGRIN_CELL_SURFACE_INTERACTIONS	79	Genes involved in Integrin cell surface interactions	15	0.1899	1.3e-08	4.39e-07
KEGG_CYTOKINE_CYTOKINE_RECEPTOR_INTERACTION	267	Cytokine-cytokine receptor interaction	28	0.1049	1.39e-08	4.59e-07
PID_INTEGRIN_CS_PATHWAY	26	Integrin family cell surface interactions	9	0.3462	4e-08	1.29e-06
KEGG_JAK_STAT_SIGNALING_PATHWAY	155	Jak-STAT signaling pathway	20	0.129	5.33e-08	1.67e-06
REACTOME_TRANSMEMBRANE_TRANSPORT_OF_SMALL_MOLECULES	413	Genes involved in Transmembrane transport of small molecules	35	0.0847	5.69e-08	1.75e-06
REACTOME_TCR_SIGNALING	54	Genes involved in TCR signaling	12	0.2222	5.84e-08	1.75e-06
BIOCARTA_TCYTOTOXIC_PATHWAY	14	T Cytotoxic Cell Surface Molecules	7	0.5	6.44e-08	1.81e-06
BIOCARTA_THELPER_PATHWAY	14	T Helper Cell Surface Molecules	7	0.5	6.44e-08	1.81e-06
KEGG_CELL_CYCLE	128	Cell cycle	18	0.1406	6.44e-08	1.81e-06
REACTOME_POST_TRANSLATIONAL_PROTEIN_MODIFICATION	188	Genes involved in Post-translational protein modification	22	0.117	6.97e-08	1.92e-06
PID_FGF_PATHWAY	55	FGF signaling pathway	12	0.2182	7.26e-08	1.92e-06
PID_IL2_1PATHWAY	55	IL2-mediated signaling events	12	0.2182	7.26e-08	1.92e-06
Gene Symbol	Description	REACTOME_IMMUNE_SYSTEM	REACTOME_CELL_CYCLE	REACTOME_CYTOKINE_SIGNALING_IN_IMMUNE_SYSTEM	REACTOME_INTERFERON_SIGNALING	PID_CXCR4_PATHWAY	REACTOME_ADAPTIVE_IMMUNE_SYSTEM	REACTOME_CELL_CYCLE_MITOTIC	REACTOME_HEMOSTASIS	REACTOME_INTERFERON_ALPHA_BETA_SIGNALING	KEGG_PATHWAYS_IN_CANCER	REACTOME_INTERFERON_GAMMA_SIGNALING	REACTOME_SIGNALING_BY_GPCR	PID_IL12_2PATHWAY	REACTOME_GPCR_DOWNSTREAM_SIGNALING	KEGG_REGULATION_OF_ACTIN_CYTOSKELETON	KEGG_CELL_ADHESION_MOLECULES_CAMS	PID_P53DOWNSTREAMPATHWAY	REACTOME_OLFACTORY_SIGNALING_PATHWAY	REACTOME_DNA_REPLICATION	PID_INTEGRIN1_PATHWAY	PID_TCR_PATHWAY	REACTOME_MITOTIC_M_M_G1_PHASES	KEGG_FOCAL_ADHESION	KEGG_P53_SIGNALING_PATHWAY	PID_CD8TCRPATHWAY	KEGG_ECM_RECEPTOR_INTERACTION	PID_E2F_PATHWAY	KEGG_LYSOSOME	BIOCARTA_TCRA_PATHWAY	REACTOME_MITOTIC_PROMETAPHASE	REACTOME_IMMUNOREGULATORY_INTERACTIONS_BETWEEN_A_LYMPHOID_AND_A_NON_LYMPHOID_CELL	REACTOME_GENERATION_OF_SECOND_MESSENGER_MOLECULES	KEGG_OLFACTORY_TRANSDUCTION	KEGG_PRIMARY_IMMUNODEFICIENCY	KEGG_T_CELL_RECEPTOR_SIGNALING_PATHWAY	PID_CD8TCRDOWNSTREAMPATHWAY	PID_IL4_2PATHWAY	KEGG_ARRHYTHMOGENIC_RIGHT_VENTRICULAR_CARDIOMYOPATHY_ARVC	REACTOME_INTEGRIN_CELL_SURFACE_INTERACTIONS	KEGG_CYTOKINE_CYTOKINE_RECEPTOR_INTERACTION	PID_INTEGRIN_CS_PATHWAY	KEGG_JAK_STAT_SIGNALING_PATHWAY	REACTOME_TRANSMEMBRANE_TRANSPORT_OF_SMALL_MOLECULES	REACTOME_TCR_SIGNALING	BIOCARTA_TCYTOTOXIC_PATHWAY	BIOCARTA_THELPER_PATHWAY	KEGG_CELL_CYCLE	REACTOME_POST_TRANSLATIONAL_PROTEIN_MODIFICATION
PIK3R3	phosphoinositide-3-kinase, regulatory subunit 3 (p55, gamma)	REACTOME_IMMUNE_SYSTEM		REACTOME_CYTOKINE_SIGNALING_IN_IMMUNE_SYSTEM		PID_CXCR4_PATHWAY	REACTOME_ADAPTIVE_IMMUNE_SYSTEM		REACTOME_HEMOSTASIS		KEGG_PATHWAYS_IN_CANCER		REACTOME_SIGNALING_BY_GPCR		REACTOME_GPCR_DOWNSTREAM_SIGNALING	KEGG_REGULATION_OF_ACTIN_CYTOSKELETON								KEGG_FOCAL_ADHESION												KEGG_T_CELL_RECEPTOR_SIGNALING_PATHWAY							KEGG_JAK_STAT_SIGNALING_PATHWAY
PIK3R5	phosphoinositide-3-kinase, regulatory subunit 5, p101					PID_CXCR4_PATHWAY			REACTOME_HEMOSTASIS		KEGG_PATHWAYS_IN_CANCER		REACTOME_SIGNALING_BY_GPCR		REACTOME_GPCR_DOWNSTREAM_SIGNALING	KEGG_REGULATION_OF_ACTIN_CYTOSKELETON								KEGG_FOCAL_ADHESION												KEGG_T_CELL_RECEPTOR_SIGNALING_PATHWAY							KEGG_JAK_STAT_SIGNALING_PATHWAY
ITGB1	integrin, beta 1 (fibronectin receptor, beta polypeptide, antigen CD29 includes MDF2, MSK12)	REACTOME_IMMUNE_SYSTEM				PID_CXCR4_PATHWAY	REACTOME_ADAPTIVE_IMMUNE_SYSTEM		REACTOME_HEMOSTASIS		KEGG_PATHWAYS_IN_CANCER					KEGG_REGULATION_OF_ACTIN_CYTOSKELETON	KEGG_CELL_ADHESION_MOLECULES_CAMS				PID_INTEGRIN1_PATHWAY			KEGG_FOCAL_ADHESION			KEGG_ECM_RECEPTOR_INTERACTION					REACTOME_IMMUNOREGULATORY_INTERACTIONS_BETWEEN_A_LYMPHOID_AND_A_NON_LYMPHOID_CELL							KEGG_ARRHYTHMOGENIC_RIGHT_VENTRICULAR_CARDIOMYOPATHY_ARVC	REACTOME_INTEGRIN_CELL_SURFACE_INTERACTIONS		PID_INTEGRIN_CS_PATHWAY
ITGA2	integrin, alpha 2 (CD49B, alpha 2 subunit of VLA-2 receptor)					PID_CXCR4_PATHWAY			REACTOME_HEMOSTASIS		KEGG_PATHWAYS_IN_CANCER					KEGG_REGULATION_OF_ACTIN_CYTOSKELETON					PID_INTEGRIN1_PATHWAY			KEGG_FOCAL_ADHESION			KEGG_ECM_RECEPTOR_INTERACTION												KEGG_ARRHYTHMOGENIC_RIGHT_VENTRICULAR_CARDIOMYOPATHY_ARVC	REACTOME_INTEGRIN_CELL_SURFACE_INTERACTIONS		PID_INTEGRIN_CS_PATHWAY
ITGA6	integrin, alpha 6					PID_CXCR4_PATHWAY					KEGG_PATHWAYS_IN_CANCER					KEGG_REGULATION_OF_ACTIN_CYTOSKELETON	KEGG_CELL_ADHESION_MOLECULES_CAMS				PID_INTEGRIN1_PATHWAY			KEGG_FOCAL_ADHESION			KEGG_ECM_RECEPTOR_INTERACTION												KEGG_ARRHYTHMOGENIC_RIGHT_VENTRICULAR_CARDIOMYOPATHY_ARVC			PID_INTEGRIN_CS_PATHWAY
STAT1	signal transducer and activator of transcription 1, 91kDa	REACTOME_IMMUNE_SYSTEM		REACTOME_CYTOKINE_SIGNALING_IN_IMMUNE_SYSTEM	REACTOME_INTERFERON_SIGNALING	PID_CXCR4_PATHWAY				REACTOME_INTERFERON_ALPHA_BETA_SIGNALING	KEGG_PATHWAYS_IN_CANCER	REACTOME_INTERFERON_GAMMA_SIGNALING		PID_IL12_2PATHWAY																													KEGG_JAK_STAT_SIGNALING_PATHWAY
STAT5A	signal transducer and activator of transcription 5A	REACTOME_IMMUNE_SYSTEM		REACTOME_CYTOKINE_SIGNALING_IN_IMMUNE_SYSTEM		PID_CXCR4_PATHWAY					KEGG_PATHWAYS_IN_CANCER			PID_IL12_2PATHWAY																								PID_IL4_2PATHWAY					KEGG_JAK_STAT_SIGNALING_PATHWAY
STAT3	signal transducer and activator of transcription 3 (acute-phase response factor)	REACTOME_IMMUNE_SYSTEM		REACTOME_CYTOKINE_SIGNALING_IN_IMMUNE_SYSTEM		PID_CXCR4_PATHWAY					KEGG_PATHWAYS_IN_CANCER			PID_IL12_2PATHWAY																													KEGG_JAK_STAT_SIGNALING_PATHWAY
CCND1	cyclin D1		REACTOME_CELL_CYCLE					REACTOME_CELL_CYCLE_MITOTIC			KEGG_PATHWAYS_IN_CANCER													KEGG_FOCAL_ADHESION	KEGG_P53_SIGNALING_PATHWAY																		KEGG_JAK_STAT_SIGNALING_PATHWAY					KEGG_CELL_CYCLE
E2F2	E2F transcription factor 2		REACTOME_CELL_CYCLE					REACTOME_CELL_CYCLE_MITOTIC			KEGG_PATHWAYS_IN_CANCER							PID_P53DOWNSTREAMPATHWAY		REACTOME_DNA_REPLICATION			REACTOME_MITOTIC_M_M_G1_PHASES					PID_E2F_PATHWAY																				KEGG_CELL_CYCLE
BIRC5	baculoviral IAP repeat-containing 5 (survivin)		REACTOME_CELL_CYCLE					REACTOME_CELL_CYCLE_MITOTIC			KEGG_PATHWAYS_IN_CANCER									REACTOME_DNA_REPLICATION			REACTOME_MITOTIC_M_M_G1_PHASES								REACTOME_MITOTIC_PROMETAPHASE
CDKN2A	cyclin-dependent kinase inhibitor 2A (melanoma, p16, inhibits CDK4)		REACTOME_CELL_CYCLE					REACTOME_CELL_CYCLE_MITOTIC			KEGG_PATHWAYS_IN_CANCER														KEGG_P53_SIGNALING_PATHWAY			PID_E2F_PATHWAY																				KEGG_CELL_CYCLE
CDK6	cyclin-dependent kinase 6		REACTOME_CELL_CYCLE					REACTOME_CELL_CYCLE_MITOTIC			KEGG_PATHWAYS_IN_CANCER														KEGG_P53_SIGNALING_PATHWAY																							KEGG_CELL_CYCLE
SHH	sonic hedgehog homolog (Drosophila)										KEGG_PATHWAYS_IN_CANCER		REACTOME_SIGNALING_BY_GPCR
WNT5A	wingless-type MMTV integration site family, member 5A										KEGG_PATHWAYS_IN_CANCER		REACTOME_SIGNALING_BY_GPCR
FZD7	frizzled homolog 7 (Drosophila)										KEGG_PATHWAYS_IN_CANCER		REACTOME_SIGNALING_BY_GPCR
FZD5	frizzled homolog 5 (Drosophila)										KEGG_PATHWAYS_IN_CANCER		REACTOME_SIGNALING_BY_GPCR
FZD2	frizzled homolog 2 (Drosophila)										KEGG_PATHWAYS_IN_CANCER		REACTOME_SIGNALING_BY_GPCR
FZD3	frizzled homolog 3 (Drosophila)										KEGG_PATHWAYS_IN_CANCER		REACTOME_SIGNALING_BY_GPCR
SMO	smoothened homolog (Drosophila)										KEGG_PATHWAYS_IN_CANCER		REACTOME_SIGNALING_BY_GPCR
BIRC3	baculoviral IAP repeat-containing 3	REACTOME_IMMUNE_SYSTEM									KEGG_PATHWAYS_IN_CANCER													KEGG_FOCAL_ADHESION
LAMC1	laminin, gamma 1 (formerly LAMB2)										KEGG_PATHWAYS_IN_CANCER										PID_INTEGRIN1_PATHWAY			KEGG_FOCAL_ADHESION			KEGG_ECM_RECEPTOR_INTERACTION													REACTOME_INTEGRIN_CELL_SURFACE_INTERACTIONS
LAMA4	laminin, alpha 4										KEGG_PATHWAYS_IN_CANCER										PID_INTEGRIN1_PATHWAY			KEGG_FOCAL_ADHESION			KEGG_ECM_RECEPTOR_INTERACTION
CASP8	caspase 8, apoptosis-related cysteine peptidase	REACTOME_IMMUNE_SYSTEM									KEGG_PATHWAYS_IN_CANCER														KEGG_P53_SIGNALING_PATHWAY
BAX	BCL2-associated X protein										KEGG_PATHWAYS_IN_CANCER							PID_P53DOWNSTREAMPATHWAY							KEGG_P53_SIGNALING_PATHWAY
PML	promyelocytic leukemia	REACTOME_IMMUNE_SYSTEM		REACTOME_CYTOKINE_SIGNALING_IN_IMMUNE_SYSTEM	REACTOME_INTERFERON_SIGNALING						KEGG_PATHWAYS_IN_CANCER	REACTOME_INTERFERON_GAMMA_SIGNALING						PID_P53DOWNSTREAMPATHWAY
FGFR1	fibroblast growth factor receptor 1 (fms-related tyrosine kinase 2, Pfeiffer syndrome)										KEGG_PATHWAYS_IN_CANCER					KEGG_REGULATION_OF_ACTIN_CYTOSKELETON
FGF2	fibroblast growth factor 2 (basic)										KEGG_PATHWAYS_IN_CANCER					KEGG_REGULATION_OF_ACTIN_CYTOSKELETON
FGF17	fibroblast growth factor 17										KEGG_PATHWAYS_IN_CANCER					KEGG_REGULATION_OF_ACTIN_CYTOSKELETON
FGF8	fibroblast growth factor 8 (androgen-induced)										KEGG_PATHWAYS_IN_CANCER					KEGG_REGULATION_OF_ACTIN_CYTOSKELETON
FGF19	fibroblast growth factor 19										KEGG_PATHWAYS_IN_CANCER					KEGG_REGULATION_OF_ACTIN_CYTOSKELETON
TGFA	transforming growth factor, alpha										KEGG_PATHWAYS_IN_CANCER							PID_P53DOWNSTREAMPATHWAY
MSH2	mutS homolog 2, colon cancer, nonpolyposis type 1 (E. coli)										KEGG_PATHWAYS_IN_CANCER							PID_P53DOWNSTREAMPATHWAY
ETS1	v-ets erythroblastosis virus E26 oncogene homolog 1 (avian)										KEGG_PATHWAYS_IN_CANCER																											PID_IL4_2PATHWAY
TCF7L1	transcription factor 7-like 1 (T-cell specific, HMG-box)										KEGG_PATHWAYS_IN_CANCER																												KEGG_ARRHYTHMOGENIC_RIGHT_VENTRICULAR_CARDIOMYOPATHY_ARVC
TGFBR2	transforming growth factor, beta receptor II (70/80kDa)										KEGG_PATHWAYS_IN_CANCER																														KEGG_CYTOKINE_CYTOKINE_RECEPTOR_INTERACTION
SLC2A1	solute carrier family 2 (facilitated glucose transporter), member 1										KEGG_PATHWAYS_IN_CANCER																																	REACTOME_TRANSMEMBRANE_TRANSPORT_OF_SMALL_MOLECULES
BMP4	bone morphogenetic protein 4										KEGG_PATHWAYS_IN_CANCER
GLI2	GLI-Kruppel family member GLI2										KEGG_PATHWAYS_IN_CANCER
GLI3	GLI-Kruppel family member GLI3 (Greig cephalopolysyndactyly syndrome)										KEGG_PATHWAYS_IN_CANCER
GSTP1	glutathione S-transferase pi										KEGG_PATHWAYS_IN_CANCER
CXCR4	chemokine (C-X-C motif) receptor 4					PID_CXCR4_PATHWAY							REACTOME_SIGNALING_BY_GPCR		REACTOME_GPCR_DOWNSTREAM_SIGNALING																										KEGG_CYTOKINE_CYTOKINE_RECEPTOR_INTERACTION
RHOC	ras homolog gene family, member C					PID_CXCR4_PATHWAY							REACTOME_SIGNALING_BY_GPCR		REACTOME_GPCR_DOWNSTREAM_SIGNALING
RGS1	regulator of G-protein signalling 1					PID_CXCR4_PATHWAY							REACTOME_SIGNALING_BY_GPCR		REACTOME_GPCR_DOWNSTREAM_SIGNALING
RAP1B	RAP1B, member of RAS oncogene family	REACTOME_IMMUNE_SYSTEM				PID_CXCR4_PATHWAY	REACTOME_ADAPTIVE_IMMUNE_SYSTEM		REACTOME_HEMOSTASIS															KEGG_FOCAL_ADHESION																REACTOME_INTEGRIN_CELL_SURFACE_INTERACTIONS
ITGA4	integrin, alpha 4 (antigen CD49D, alpha 4 subunit of VLA-4 receptor)					PID_CXCR4_PATHWAY										KEGG_REGULATION_OF_ACTIN_CYTOSKELETON	KEGG_CELL_ADHESION_MOLECULES_CAMS				PID_INTEGRIN1_PATHWAY			KEGG_FOCAL_ADHESION			KEGG_ECM_RECEPTOR_INTERACTION												KEGG_ARRHYTHMOGENIC_RIGHT_VENTRICULAR_CARDIOMYOPATHY_ARVC			PID_INTEGRIN_CS_PATHWAY
ITGA10	integrin, alpha 10					PID_CXCR4_PATHWAY										KEGG_REGULATION_OF_ACTIN_CYTOSKELETON					PID_INTEGRIN1_PATHWAY			KEGG_FOCAL_ADHESION			KEGG_ECM_RECEPTOR_INTERACTION												KEGG_ARRHYTHMOGENIC_RIGHT_VENTRICULAR_CARDIOMYOPATHY_ARVC	REACTOME_INTEGRIN_CELL_SURFACE_INTERACTIONS		PID_INTEGRIN_CS_PATHWAY
ITGA11	integrin, alpha 11					PID_CXCR4_PATHWAY										KEGG_REGULATION_OF_ACTIN_CYTOSKELETON					PID_INTEGRIN1_PATHWAY			KEGG_FOCAL_ADHESION			KEGG_ECM_RECEPTOR_INTERACTION												KEGG_ARRHYTHMOGENIC_RIGHT_VENTRICULAR_CARDIOMYOPATHY_ARVC	REACTOME_INTEGRIN_CELL_SURFACE_INTERACTIONS		PID_INTEGRIN_CS_PATHWAY
LCK	lymphocyte-specific protein tyrosine kinase	REACTOME_IMMUNE_SYSTEM		REACTOME_CYTOKINE_SIGNALING_IN_IMMUNE_SYSTEM		PID_CXCR4_PATHWAY	REACTOME_ADAPTIVE_IMMUNE_SYSTEM		REACTOME_HEMOSTASIS					PID_IL12_2PATHWAY								PID_TCR_PATHWAY				PID_CD8TCRPATHWAY				BIOCARTA_TCRA_PATHWAY			REACTOME_GENERATION_OF_SECOND_MESSENGER_MOLECULES		KEGG_PRIMARY_IMMUNODEFICIENCY	KEGG_T_CELL_RECEPTOR_SIGNALING_PATHWAY									REACTOME_TCR_SIGNALING
LYN	v-yes-1 Yamaguchi sarcoma viral related oncogene homolog	REACTOME_IMMUNE_SYSTEM		REACTOME_CYTOKINE_SIGNALING_IN_IMMUNE_SYSTEM		PID_CXCR4_PATHWAY	REACTOME_ADAPTIVE_IMMUNE_SYSTEM		REACTOME_HEMOSTASIS
YES1	v-yes-1 Yamaguchi sarcoma viral oncogene homolog 1	REACTOME_IMMUNE_SYSTEM		REACTOME_CYTOKINE_SIGNALING_IN_IMMUNE_SYSTEM		PID_CXCR4_PATHWAY	REACTOME_ADAPTIVE_IMMUNE_SYSTEM		REACTOME_HEMOSTASIS
CD4	CD4 molecule	REACTOME_IMMUNE_SYSTEM				PID_CXCR4_PATHWAY	REACTOME_ADAPTIVE_IMMUNE_SYSTEM							PID_IL12_2PATHWAY			KEGG_CELL_ADHESION_MOLECULES_CAMS					PID_TCR_PATHWAY								BIOCARTA_TCRA_PATHWAY			REACTOME_GENERATION_OF_SECOND_MESSENGER_MOLECULES		KEGG_PRIMARY_IMMUNODEFICIENCY	KEGG_T_CELL_RECEPTOR_SIGNALING_PATHWAY									REACTOME_TCR_SIGNALING		BIOCARTA_THELPER_PATHWAY
CD3D	CD3d molecule, delta (CD3-TCR complex)	REACTOME_IMMUNE_SYSTEM				PID_CXCR4_PATHWAY	REACTOME_ADAPTIVE_IMMUNE_SYSTEM							PID_IL12_2PATHWAY								PID_TCR_PATHWAY				PID_CD8TCRPATHWAY				BIOCARTA_TCRA_PATHWAY		REACTOME_IMMUNOREGULATORY_INTERACTIONS_BETWEEN_A_LYMPHOID_AND_A_NON_LYMPHOID_CELL	REACTOME_GENERATION_OF_SECOND_MESSENGER_MOLECULES		KEGG_PRIMARY_IMMUNODEFICIENCY	KEGG_T_CELL_RECEPTOR_SIGNALING_PATHWAY	PID_CD8TCRDOWNSTREAMPATHWAY								REACTOME_TCR_SIGNALING	BIOCARTA_TCYTOTOXIC_PATHWAY	BIOCARTA_THELPER_PATHWAY
CD3E	CD3e molecule, epsilon (CD3-TCR complex)	REACTOME_IMMUNE_SYSTEM				PID_CXCR4_PATHWAY	REACTOME_ADAPTIVE_IMMUNE_SYSTEM							PID_IL12_2PATHWAY								PID_TCR_PATHWAY				PID_CD8TCRPATHWAY				BIOCARTA_TCRA_PATHWAY		REACTOME_IMMUNOREGULATORY_INTERACTIONS_BETWEEN_A_LYMPHOID_AND_A_NON_LYMPHOID_CELL	REACTOME_GENERATION_OF_SECOND_MESSENGER_MOLECULES		KEGG_PRIMARY_IMMUNODEFICIENCY	KEGG_T_CELL_RECEPTOR_SIGNALING_PATHWAY	PID_CD8TCRDOWNSTREAMPATHWAY								REACTOME_TCR_SIGNALING	BIOCARTA_TCYTOTOXIC_PATHWAY	BIOCARTA_THELPER_PATHWAY
CD3G	CD3g molecule, gamma (CD3-TCR complex)	REACTOME_IMMUNE_SYSTEM				PID_CXCR4_PATHWAY	REACTOME_ADAPTIVE_IMMUNE_SYSTEM							PID_IL12_2PATHWAY								PID_TCR_PATHWAY				PID_CD8TCRPATHWAY				BIOCARTA_TCRA_PATHWAY		REACTOME_IMMUNOREGULATORY_INTERACTIONS_BETWEEN_A_LYMPHOID_AND_A_NON_LYMPHOID_CELL	REACTOME_GENERATION_OF_SECOND_MESSENGER_MOLECULES			KEGG_T_CELL_RECEPTOR_SIGNALING_PATHWAY	PID_CD8TCRDOWNSTREAMPATHWAY								REACTOME_TCR_SIGNALING	BIOCARTA_TCYTOTOXIC_PATHWAY	BIOCARTA_THELPER_PATHWAY
PTPRC	protein tyrosine phosphatase, receptor type, C	REACTOME_IMMUNE_SYSTEM				PID_CXCR4_PATHWAY	REACTOME_ADAPTIVE_IMMUNE_SYSTEM										KEGG_CELL_ADHESION_MOLECULES_CAMS					PID_TCR_PATHWAY				PID_CD8TCRPATHWAY				BIOCARTA_TCRA_PATHWAY					KEGG_PRIMARY_IMMUNODEFICIENCY	KEGG_T_CELL_RECEPTOR_SIGNALING_PATHWAY									REACTOME_TCR_SIGNALING	BIOCARTA_TCYTOTOXIC_PATHWAY	BIOCARTA_THELPER_PATHWAY
HLA-DRA	major histocompatibility complex, class II, DR alpha					PID_CXCR4_PATHWAY								PID_IL12_2PATHWAY			KEGG_CELL_ADHESION_MOLECULES_CAMS					PID_TCR_PATHWAY								BIOCARTA_TCRA_PATHWAY
INPP5D	inositol polyphosphate-5-phosphatase, 145kDa					PID_CXCR4_PATHWAY																PID_TCR_PATHWAY																PID_IL4_2PATHWAY
VPS4B	vacuolar protein sorting 4 homolog B (S. cerevisiae)					PID_CXCR4_PATHWAY
CCND3	cyclin D3		REACTOME_CELL_CYCLE					REACTOME_CELL_CYCLE_MITOTIC																KEGG_FOCAL_ADHESION	KEGG_P53_SIGNALING_PATHWAY			PID_E2F_PATHWAY															KEGG_JAK_STAT_SIGNALING_PATHWAY					KEGG_CELL_CYCLE
WEE1	WEE1 homolog (S. pombe)		REACTOME_CELL_CYCLE					REACTOME_CELL_CYCLE_MITOTIC	REACTOME_HEMOSTASIS																																							KEGG_CELL_CYCLE
NUP107	nucleoporin 107kDa	REACTOME_IMMUNE_SYSTEM	REACTOME_CELL_CYCLE	REACTOME_CYTOKINE_SIGNALING_IN_IMMUNE_SYSTEM	REACTOME_INTERFERON_SIGNALING			REACTOME_CELL_CYCLE_MITOTIC												REACTOME_DNA_REPLICATION			REACTOME_MITOTIC_M_M_G1_PHASES								REACTOME_MITOTIC_PROMETAPHASE													REACTOME_TRANSMEMBRANE_TRANSPORT_OF_SMALL_MOLECULES
NUP37	nucleoporin 37kDa	REACTOME_IMMUNE_SYSTEM	REACTOME_CELL_CYCLE	REACTOME_CYTOKINE_SIGNALING_IN_IMMUNE_SYSTEM	REACTOME_INTERFERON_SIGNALING			REACTOME_CELL_CYCLE_MITOTIC												REACTOME_DNA_REPLICATION			REACTOME_MITOTIC_M_M_G1_PHASES								REACTOME_MITOTIC_PROMETAPHASE													REACTOME_TRANSMEMBRANE_TRANSPORT_OF_SMALL_MOLECULES
CDC20	CDC20 cell division cycle 20 homolog (S. cerevisiae)	REACTOME_IMMUNE_SYSTEM	REACTOME_CELL_CYCLE				REACTOME_ADAPTIVE_IMMUNE_SYSTEM	REACTOME_CELL_CYCLE_MITOTIC												REACTOME_DNA_REPLICATION			REACTOME_MITOTIC_M_M_G1_PHASES								REACTOME_MITOTIC_PROMETAPHASE																	KEGG_CELL_CYCLE
PSME1	proteasome (prosome, macropain) activator subunit 1 (PA28 alpha)	REACTOME_IMMUNE_SYSTEM	REACTOME_CELL_CYCLE				REACTOME_ADAPTIVE_IMMUNE_SYSTEM	REACTOME_CELL_CYCLE_MITOTIC												REACTOME_DNA_REPLICATION			REACTOME_MITOTIC_M_M_G1_PHASES
PCNA	proliferating cell nuclear antigen		REACTOME_CELL_CYCLE					REACTOME_CELL_CYCLE_MITOTIC										PID_P53DOWNSTREAMPATHWAY		REACTOME_DNA_REPLICATION																												KEGG_CELL_CYCLE
CDC6	CDC6 cell division cycle 6 homolog (S. cerevisiae)		REACTOME_CELL_CYCLE					REACTOME_CELL_CYCLE_MITOTIC												REACTOME_DNA_REPLICATION			REACTOME_MITOTIC_M_M_G1_PHASES					PID_E2F_PATHWAY																				KEGG_CELL_CYCLE
MCM3	MCM3 minichromosome maintenance deficient 3 (S. cerevisiae)		REACTOME_CELL_CYCLE					REACTOME_CELL_CYCLE_MITOTIC												REACTOME_DNA_REPLICATION			REACTOME_MITOTIC_M_M_G1_PHASES					PID_E2F_PATHWAY																				KEGG_CELL_CYCLE
BUB1	BUB1 budding uninhibited by benzimidazoles 1 homolog (yeast)		REACTOME_CELL_CYCLE					REACTOME_CELL_CYCLE_MITOTIC												REACTOME_DNA_REPLICATION			REACTOME_MITOTIC_M_M_G1_PHASES								REACTOME_MITOTIC_PROMETAPHASE																	KEGG_CELL_CYCLE
SMC3	structural maintenance of chromosomes 3		REACTOME_CELL_CYCLE					REACTOME_CELL_CYCLE_MITOTIC												REACTOME_DNA_REPLICATION			REACTOME_MITOTIC_M_M_G1_PHASES								REACTOME_MITOTIC_PROMETAPHASE																	KEGG_CELL_CYCLE
MAD2L1	MAD2 mitotic arrest deficient-like 1 (yeast)		REACTOME_CELL_CYCLE					REACTOME_CELL_CYCLE_MITOTIC												REACTOME_DNA_REPLICATION			REACTOME_MITOTIC_M_M_G1_PHASES								REACTOME_MITOTIC_PROMETAPHASE																	KEGG_CELL_CYCLE
SGOL1	shugoshin-like 1 (S. pombe)		REACTOME_CELL_CYCLE					REACTOME_CELL_CYCLE_MITOTIC												REACTOME_DNA_REPLICATION			REACTOME_MITOTIC_M_M_G1_PHASES								REACTOME_MITOTIC_PROMETAPHASE
AURKB	aurora kinase B		REACTOME_CELL_CYCLE					REACTOME_CELL_CYCLE_MITOTIC												REACTOME_DNA_REPLICATION			REACTOME_MITOTIC_M_M_G1_PHASES								REACTOME_MITOTIC_PROMETAPHASE
CDCA8	cell division cycle associated 8		REACTOME_CELL_CYCLE					REACTOME_CELL_CYCLE_MITOTIC												REACTOME_DNA_REPLICATION			REACTOME_MITOTIC_M_M_G1_PHASES								REACTOME_MITOTIC_PROMETAPHASE
CASC5	cancer susceptibility candidate 5		REACTOME_CELL_CYCLE					REACTOME_CELL_CYCLE_MITOTIC												REACTOME_DNA_REPLICATION			REACTOME_MITOTIC_M_M_G1_PHASES								REACTOME_MITOTIC_PROMETAPHASE
CENPK	centromere protein K		REACTOME_CELL_CYCLE					REACTOME_CELL_CYCLE_MITOTIC												REACTOME_DNA_REPLICATION			REACTOME_MITOTIC_M_M_G1_PHASES								REACTOME_MITOTIC_PROMETAPHASE
CENPQ	centromere protein Q		REACTOME_CELL_CYCLE					REACTOME_CELL_CYCLE_MITOTIC												REACTOME_DNA_REPLICATION			REACTOME_MITOTIC_M_M_G1_PHASES								REACTOME_MITOTIC_PROMETAPHASE
TAOK1	TAO kinase 1		REACTOME_CELL_CYCLE					REACTOME_CELL_CYCLE_MITOTIC												REACTOME_DNA_REPLICATION			REACTOME_MITOTIC_M_M_G1_PHASES								REACTOME_MITOTIC_PROMETAPHASE
CCDC99	coiled-coil domain containing 99		REACTOME_CELL_CYCLE					REACTOME_CELL_CYCLE_MITOTIC												REACTOME_DNA_REPLICATION			REACTOME_MITOTIC_M_M_G1_PHASES								REACTOME_MITOTIC_PROMETAPHASE
CENPM	centromere protein M		REACTOME_CELL_CYCLE					REACTOME_CELL_CYCLE_MITOTIC												REACTOME_DNA_REPLICATION			REACTOME_MITOTIC_M_M_G1_PHASES								REACTOME_MITOTIC_PROMETAPHASE
ZWINT	ZW10 interactor		REACTOME_CELL_CYCLE					REACTOME_CELL_CYCLE_MITOTIC												REACTOME_DNA_REPLICATION			REACTOME_MITOTIC_M_M_G1_PHASES								REACTOME_MITOTIC_PROMETAPHASE
FBXO5	F-box protein 5		REACTOME_CELL_CYCLE					REACTOME_CELL_CYCLE_MITOTIC												REACTOME_DNA_REPLICATION			REACTOME_MITOTIC_M_M_G1_PHASES
CDT1	chromatin licensing and DNA replication factor 1		REACTOME_CELL_CYCLE					REACTOME_CELL_CYCLE_MITOTIC												REACTOME_DNA_REPLICATION			REACTOME_MITOTIC_M_M_G1_PHASES
MCM8	MCM8 minichromosome maintenance deficient 8 (S. cerevisiae)		REACTOME_CELL_CYCLE					REACTOME_CELL_CYCLE_MITOTIC												REACTOME_DNA_REPLICATION			REACTOME_MITOTIC_M_M_G1_PHASES
GMNN	geminin, DNA replication inhibitor		REACTOME_CELL_CYCLE					REACTOME_CELL_CYCLE_MITOTIC												REACTOME_DNA_REPLICATION			REACTOME_MITOTIC_M_M_G1_PHASES
POLD4	polymerase (DNA-directed), delta 4		REACTOME_CELL_CYCLE					REACTOME_CELL_CYCLE_MITOTIC												REACTOME_DNA_REPLICATION
CCNB1	cyclin B1		REACTOME_CELL_CYCLE					REACTOME_CELL_CYCLE_MITOTIC										PID_P53DOWNSTREAMPATHWAY							KEGG_P53_SIGNALING_PATHWAY																							KEGG_CELL_CYCLE
RRM2	ribonucleotide reductase M2 polypeptide		REACTOME_CELL_CYCLE					REACTOME_CELL_CYCLE_MITOTIC																	KEGG_P53_SIGNALING_PATHWAY			PID_E2F_PATHWAY
UBE2C	ubiquitin-conjugating enzyme E2C	REACTOME_IMMUNE_SYSTEM	REACTOME_CELL_CYCLE				REACTOME_ADAPTIVE_IMMUNE_SYSTEM	REACTOME_CELL_CYCLE_MITOTIC
TYMS	thymidylate synthetase		REACTOME_CELL_CYCLE					REACTOME_CELL_CYCLE_MITOTIC																				PID_E2F_PATHWAY
DHFR	dihydrofolate reductase		REACTOME_CELL_CYCLE					REACTOME_CELL_CYCLE_MITOTIC																				PID_E2F_PATHWAY
CDC25B	cell division cycle 25B		REACTOME_CELL_CYCLE					REACTOME_CELL_CYCLE_MITOTIC																																								KEGG_CELL_CYCLE
PTTG1	pituitary tumor-transforming 1		REACTOME_CELL_CYCLE					REACTOME_CELL_CYCLE_MITOTIC																																								KEGG_CELL_CYCLE
CDC14A	CDC14 cell division cycle 14 homolog A (S. cerevisiae)		REACTOME_CELL_CYCLE					REACTOME_CELL_CYCLE_MITOTIC																																								KEGG_CELL_CYCLE
AURKA	aurora kinase A		REACTOME_CELL_CYCLE					REACTOME_CELL_CYCLE_MITOTIC
NEK2	NIMA (never in mitosis gene a)-related kinase 2		REACTOME_CELL_CYCLE					REACTOME_CELL_CYCLE_MITOTIC
NEDD1	neural precursor cell expressed, developmentally down-regulated 1		REACTOME_CELL_CYCLE					REACTOME_CELL_CYCLE_MITOTIC
CEP70	centrosomal protein 70kDa		REACTOME_CELL_CYCLE					REACTOME_CELL_CYCLE_MITOTIC
BRCA1	breast cancer 1, early onset		REACTOME_CELL_CYCLE																									PID_E2F_PATHWAY
LMNA	lamin A/C		REACTOME_CELL_CYCLE																																				KEGG_ARRHYTHMOGENIC_RIGHT_VENTRICULAR_CARDIOMYOPATHY_ARVC
NPM1	nucleophosmin (nucleolar phosphoprotein B23, numatrin)		REACTOME_CELL_CYCLE
HIST1H2AC	histone cluster 1, H2ac		REACTOME_CELL_CYCLE
HIST1H2AE	histone cluster 1, H2ae		REACTOME_CELL_CYCLE
HIST1H2BD	histone cluster 1, H2bd		REACTOME_CELL_CYCLE
HIST1H2BK	histone cluster 1, H2bk		REACTOME_CELL_CYCLE
ROCK1	Rho-associated, coiled-coil containing protein kinase 1												REACTOME_SIGNALING_BY_GPCR		REACTOME_GPCR_DOWNSTREAM_SIGNALING	KEGG_REGULATION_OF_ACTIN_CYTOSKELETON								KEGG_FOCAL_ADHESION
F2R	coagulation factor II (thrombin) receptor								REACTOME_HEMOSTASIS				REACTOME_SIGNALING_BY_GPCR		REACTOME_GPCR_DOWNSTREAM_SIGNALING	KEGG_REGULATION_OF_ACTIN_CYTOSKELETON
GNG11	guanine nucleotide binding protein (G protein), gamma 11								REACTOME_HEMOSTASIS				REACTOME_SIGNALING_BY_GPCR		REACTOME_GPCR_DOWNSTREAM_SIGNALING																													REACTOME_TRANSMEMBRANE_TRANSPORT_OF_SMALL_MOLECULES
PRKCH	protein kinase C, eta								REACTOME_HEMOSTASIS				REACTOME_SIGNALING_BY_GPCR		REACTOME_GPCR_DOWNSTREAM_SIGNALING
PDE3A	phosphodiesterase 3A, cGMP-inhibited								REACTOME_HEMOSTASIS				REACTOME_SIGNALING_BY_GPCR		REACTOME_GPCR_DOWNSTREAM_SIGNALING
CCR5	chemokine (C-C motif) receptor 5												REACTOME_SIGNALING_BY_GPCR	PID_IL12_2PATHWAY	REACTOME_GPCR_DOWNSTREAM_SIGNALING																										KEGG_CYTOKINE_CYTOKINE_RECEPTOR_INTERACTION
OR10A5	olfactory receptor, family 10, subfamily A, member 5												REACTOME_SIGNALING_BY_GPCR		REACTOME_GPCR_DOWNSTREAM_SIGNALING				REACTOME_OLFACTORY_SIGNALING_PATHWAY															KEGG_OLFACTORY_TRANSDUCTION
OR10AD1	olfactory receptor, family 10, subfamily AD, member 1												REACTOME_SIGNALING_BY_GPCR		REACTOME_GPCR_DOWNSTREAM_SIGNALING				REACTOME_OLFACTORY_SIGNALING_PATHWAY															KEGG_OLFACTORY_TRANSDUCTION
OR10H2	olfactory receptor, family 10, subfamily H, member 2												REACTOME_SIGNALING_BY_GPCR		REACTOME_GPCR_DOWNSTREAM_SIGNALING				REACTOME_OLFACTORY_SIGNALING_PATHWAY															KEGG_OLFACTORY_TRANSDUCTION
OR10H4	olfactory receptor, family 10, subfamily H, member 4												REACTOME_SIGNALING_BY_GPCR		REACTOME_GPCR_DOWNSTREAM_SIGNALING				REACTOME_OLFACTORY_SIGNALING_PATHWAY															KEGG_OLFACTORY_TRANSDUCTION
OR10J1	olfactory receptor, family 10, subfamily J, member 1												REACTOME_SIGNALING_BY_GPCR		REACTOME_GPCR_DOWNSTREAM_SIGNALING				REACTOME_OLFACTORY_SIGNALING_PATHWAY															KEGG_OLFACTORY_TRANSDUCTION
OR10K2	olfactory receptor, family 10, subfamily K, member 2												REACTOME_SIGNALING_BY_GPCR		REACTOME_GPCR_DOWNSTREAM_SIGNALING				REACTOME_OLFACTORY_SIGNALING_PATHWAY															KEGG_OLFACTORY_TRANSDUCTION
OR10P1	olfactory receptor, family 10, subfamily P, member 1												REACTOME_SIGNALING_BY_GPCR		REACTOME_GPCR_DOWNSTREAM_SIGNALING				REACTOME_OLFACTORY_SIGNALING_PATHWAY															KEGG_OLFACTORY_TRANSDUCTION
OR10Z1	olfactory receptor, family 10, subfamily Z, member 1												REACTOME_SIGNALING_BY_GPCR		REACTOME_GPCR_DOWNSTREAM_SIGNALING				REACTOME_OLFACTORY_SIGNALING_PATHWAY															KEGG_OLFACTORY_TRANSDUCTION
OR11G2	olfactory receptor, family 11, subfamily G, member 2												REACTOME_SIGNALING_BY_GPCR		REACTOME_GPCR_DOWNSTREAM_SIGNALING				REACTOME_OLFACTORY_SIGNALING_PATHWAY															KEGG_OLFACTORY_TRANSDUCTION
OR1A1	olfactory receptor, family 1, subfamily A, member 1												REACTOME_SIGNALING_BY_GPCR		REACTOME_GPCR_DOWNSTREAM_SIGNALING				REACTOME_OLFACTORY_SIGNALING_PATHWAY															KEGG_OLFACTORY_TRANSDUCTION
OR1I1	olfactory receptor, family 1, subfamily I, member 1												REACTOME_SIGNALING_BY_GPCR		REACTOME_GPCR_DOWNSTREAM_SIGNALING				REACTOME_OLFACTORY_SIGNALING_PATHWAY															KEGG_OLFACTORY_TRANSDUCTION
OR1J2	olfactory receptor, family 1, subfamily J, member 2												REACTOME_SIGNALING_BY_GPCR		REACTOME_GPCR_DOWNSTREAM_SIGNALING				REACTOME_OLFACTORY_SIGNALING_PATHWAY															KEGG_OLFACTORY_TRANSDUCTION
OR1J4	olfactory receptor, family 1, subfamily J, member 4												REACTOME_SIGNALING_BY_GPCR		REACTOME_GPCR_DOWNSTREAM_SIGNALING				REACTOME_OLFACTORY_SIGNALING_PATHWAY															KEGG_OLFACTORY_TRANSDUCTION
OR1L1	olfactory receptor, family 1, subfamily L, member 1												REACTOME_SIGNALING_BY_GPCR		REACTOME_GPCR_DOWNSTREAM_SIGNALING				REACTOME_OLFACTORY_SIGNALING_PATHWAY															KEGG_OLFACTORY_TRANSDUCTION
OR1M1	olfactory receptor, family 1, subfamily M, member 1												REACTOME_SIGNALING_BY_GPCR		REACTOME_GPCR_DOWNSTREAM_SIGNALING				REACTOME_OLFACTORY_SIGNALING_PATHWAY															KEGG_OLFACTORY_TRANSDUCTION
OR1N1	olfactory receptor, family 1, subfamily N, member 1												REACTOME_SIGNALING_BY_GPCR		REACTOME_GPCR_DOWNSTREAM_SIGNALING				REACTOME_OLFACTORY_SIGNALING_PATHWAY															KEGG_OLFACTORY_TRANSDUCTION
OR4D1	olfactory receptor, family 4, subfamily D, member 1												REACTOME_SIGNALING_BY_GPCR		REACTOME_GPCR_DOWNSTREAM_SIGNALING				REACTOME_OLFACTORY_SIGNALING_PATHWAY															KEGG_OLFACTORY_TRANSDUCTION
OR4K14	olfactory receptor, family 4, subfamily K, member 14												REACTOME_SIGNALING_BY_GPCR		REACTOME_GPCR_DOWNSTREAM_SIGNALING				REACTOME_OLFACTORY_SIGNALING_PATHWAY															KEGG_OLFACTORY_TRANSDUCTION
OR4K5	olfactory receptor, family 4, subfamily K, member 5												REACTOME_SIGNALING_BY_GPCR		REACTOME_GPCR_DOWNSTREAM_SIGNALING				REACTOME_OLFACTORY_SIGNALING_PATHWAY															KEGG_OLFACTORY_TRANSDUCTION
OR4N2	olfactory receptor, family 4, subfamily N, member 2												REACTOME_SIGNALING_BY_GPCR		REACTOME_GPCR_DOWNSTREAM_SIGNALING				REACTOME_OLFACTORY_SIGNALING_PATHWAY															KEGG_OLFACTORY_TRANSDUCTION
OR4X1	olfactory receptor, family 4, subfamily X, member 1												REACTOME_SIGNALING_BY_GPCR		REACTOME_GPCR_DOWNSTREAM_SIGNALING				REACTOME_OLFACTORY_SIGNALING_PATHWAY															KEGG_OLFACTORY_TRANSDUCTION
OR51D1	olfactory receptor, family 51, subfamily D, member 1												REACTOME_SIGNALING_BY_GPCR		REACTOME_GPCR_DOWNSTREAM_SIGNALING				REACTOME_OLFACTORY_SIGNALING_PATHWAY															KEGG_OLFACTORY_TRANSDUCTION
OR52A1	olfactory receptor, family 52, subfamily A, member 1												REACTOME_SIGNALING_BY_GPCR		REACTOME_GPCR_DOWNSTREAM_SIGNALING				REACTOME_OLFACTORY_SIGNALING_PATHWAY															KEGG_OLFACTORY_TRANSDUCTION
OR52A5	olfactory receptor, family 52, subfamily A, member 5												REACTOME_SIGNALING_BY_GPCR		REACTOME_GPCR_DOWNSTREAM_SIGNALING				REACTOME_OLFACTORY_SIGNALING_PATHWAY															KEGG_OLFACTORY_TRANSDUCTION
OR52J3	olfactory receptor, family 52, subfamily J, member 3												REACTOME_SIGNALING_BY_GPCR		REACTOME_GPCR_DOWNSTREAM_SIGNALING				REACTOME_OLFACTORY_SIGNALING_PATHWAY															KEGG_OLFACTORY_TRANSDUCTION
OR52R1	olfactory receptor, family 52, subfamily R, member 1												REACTOME_SIGNALING_BY_GPCR		REACTOME_GPCR_DOWNSTREAM_SIGNALING				REACTOME_OLFACTORY_SIGNALING_PATHWAY															KEGG_OLFACTORY_TRANSDUCTION
OR56A3	olfactory receptor, family 56, subfamily A, member 3												REACTOME_SIGNALING_BY_GPCR		REACTOME_GPCR_DOWNSTREAM_SIGNALING				REACTOME_OLFACTORY_SIGNALING_PATHWAY															KEGG_OLFACTORY_TRANSDUCTION
OR5A2	olfactory receptor, family 5, subfamily A, member 2												REACTOME_SIGNALING_BY_GPCR		REACTOME_GPCR_DOWNSTREAM_SIGNALING				REACTOME_OLFACTORY_SIGNALING_PATHWAY															KEGG_OLFACTORY_TRANSDUCTION
OR5AP2	olfactory receptor, family 5, subfamily AP, member 2												REACTOME_SIGNALING_BY_GPCR		REACTOME_GPCR_DOWNSTREAM_SIGNALING				REACTOME_OLFACTORY_SIGNALING_PATHWAY															KEGG_OLFACTORY_TRANSDUCTION
OR6Q1	olfactory receptor, family 6, subfamily Q, member 1												REACTOME_SIGNALING_BY_GPCR		REACTOME_GPCR_DOWNSTREAM_SIGNALING				REACTOME_OLFACTORY_SIGNALING_PATHWAY															KEGG_OLFACTORY_TRANSDUCTION
OR6V1	olfactory receptor, family 6, subfamily V, member 1												REACTOME_SIGNALING_BY_GPCR		REACTOME_GPCR_DOWNSTREAM_SIGNALING				REACTOME_OLFACTORY_SIGNALING_PATHWAY															KEGG_OLFACTORY_TRANSDUCTION
OR6X1	olfactory receptor, family 6, subfamily X, member 1												REACTOME_SIGNALING_BY_GPCR		REACTOME_GPCR_DOWNSTREAM_SIGNALING				REACTOME_OLFACTORY_SIGNALING_PATHWAY															KEGG_OLFACTORY_TRANSDUCTION
OR7C1	olfactory receptor, family 7, subfamily C, member 1												REACTOME_SIGNALING_BY_GPCR		REACTOME_GPCR_DOWNSTREAM_SIGNALING				REACTOME_OLFACTORY_SIGNALING_PATHWAY															KEGG_OLFACTORY_TRANSDUCTION
OR8B12	olfactory receptor, family 8, subfamily B, member 12												REACTOME_SIGNALING_BY_GPCR		REACTOME_GPCR_DOWNSTREAM_SIGNALING				REACTOME_OLFACTORY_SIGNALING_PATHWAY															KEGG_OLFACTORY_TRANSDUCTION
OR8H1	olfactory receptor, family 8, subfamily H, member 1												REACTOME_SIGNALING_BY_GPCR		REACTOME_GPCR_DOWNSTREAM_SIGNALING				REACTOME_OLFACTORY_SIGNALING_PATHWAY															KEGG_OLFACTORY_TRANSDUCTION
OR5B2	olfactory receptor, family 5, subfamily B, member 2												REACTOME_SIGNALING_BY_GPCR		REACTOME_GPCR_DOWNSTREAM_SIGNALING				REACTOME_OLFACTORY_SIGNALING_PATHWAY
CXCR3	chemokine (C-X-C motif) receptor 3												REACTOME_SIGNALING_BY_GPCR		REACTOME_GPCR_DOWNSTREAM_SIGNALING																										KEGG_CYTOKINE_CYTOKINE_RECEPTOR_INTERACTION
CXCL10	chemokine (C-X-C motif) ligand 10												REACTOME_SIGNALING_BY_GPCR		REACTOME_GPCR_DOWNSTREAM_SIGNALING																										KEGG_CYTOKINE_CYTOKINE_RECEPTOR_INTERACTION
CCR3	chemokine (C-C motif) receptor 3												REACTOME_SIGNALING_BY_GPCR		REACTOME_GPCR_DOWNSTREAM_SIGNALING																										KEGG_CYTOKINE_CYTOKINE_RECEPTOR_INTERACTION
CCR1	chemokine (C-C motif) receptor 1												REACTOME_SIGNALING_BY_GPCR		REACTOME_GPCR_DOWNSTREAM_SIGNALING																										KEGG_CYTOKINE_CYTOKINE_RECEPTOR_INTERACTION
CXCL16	chemokine (C-X-C motif) ligand 16												REACTOME_SIGNALING_BY_GPCR		REACTOME_GPCR_DOWNSTREAM_SIGNALING																										KEGG_CYTOKINE_CYTOKINE_RECEPTOR_INTERACTION
XCR1	chemokine (C motif) receptor 1												REACTOME_SIGNALING_BY_GPCR		REACTOME_GPCR_DOWNSTREAM_SIGNALING																										KEGG_CYTOKINE_CYTOKINE_RECEPTOR_INTERACTION
ECT2	epithelial cell transforming sequence 2 oncogene												REACTOME_SIGNALING_BY_GPCR		REACTOME_GPCR_DOWNSTREAM_SIGNALING
GRK5	G protein-coupled receptor kinase 5												REACTOME_SIGNALING_BY_GPCR		REACTOME_GPCR_DOWNSTREAM_SIGNALING
ADCYAP1	adenylate cyclase activating polypeptide 1 (pituitary)												REACTOME_SIGNALING_BY_GPCR		REACTOME_GPCR_DOWNSTREAM_SIGNALING
CALCRL	calcitonin receptor-like												REACTOME_SIGNALING_BY_GPCR		REACTOME_GPCR_DOWNSTREAM_SIGNALING
POMC	proopiomelanocortin (adrenocorticotropin/ beta-lipotropin/ alpha-melanocyte stimulating hormone/ beta-melanocyte stimulating hormone/ beta-endorphin)												REACTOME_SIGNALING_BY_GPCR		REACTOME_GPCR_DOWNSTREAM_SIGNALING
EDNRB	endothelin receptor type B												REACTOME_SIGNALING_BY_GPCR		REACTOME_GPCR_DOWNSTREAM_SIGNALING
ANXA1	annexin A1												REACTOME_SIGNALING_BY_GPCR		REACTOME_GPCR_DOWNSTREAM_SIGNALING
HEBP1	heme binding protein 1												REACTOME_SIGNALING_BY_GPCR		REACTOME_GPCR_DOWNSTREAM_SIGNALING
PNOC	prepronociceptin												REACTOME_SIGNALING_BY_GPCR		REACTOME_GPCR_DOWNSTREAM_SIGNALING
MTNR1B	melatonin receptor 1B												REACTOME_SIGNALING_BY_GPCR		REACTOME_GPCR_DOWNSTREAM_SIGNALING
P2RY10	purinergic receptor P2Y, G-protein coupled, 10												REACTOME_SIGNALING_BY_GPCR		REACTOME_GPCR_DOWNSTREAM_SIGNALING
P2RY6	pyrimidinergic receptor P2Y, G-protein coupled, 6												REACTOME_SIGNALING_BY_GPCR		REACTOME_GPCR_DOWNSTREAM_SIGNALING
FGD4	FYVE, RhoGEF and PH domain containing 4												REACTOME_SIGNALING_BY_GPCR		REACTOME_GPCR_DOWNSTREAM_SIGNALING
CD97	CD97 molecule												REACTOME_SIGNALING_BY_GPCR
SHC1	SHC (Src homology 2 domain containing) transforming protein 1	REACTOME_IMMUNE_SYSTEM		REACTOME_CYTOKINE_SIGNALING_IN_IMMUNE_SYSTEM			REACTOME_ADAPTIVE_IMMUNE_SYSTEM		REACTOME_HEMOSTASIS													PID_TCR_PATHWAY		KEGG_FOCAL_ADHESION		PID_CD8TCRPATHWAY												PID_IL4_2PATHWAY		REACTOME_INTEGRIN_CELL_SURFACE_INTERACTIONS
VCL	vinculin								REACTOME_HEMOSTASIS							KEGG_REGULATION_OF_ACTIN_CYTOSKELETON								KEGG_FOCAL_ADHESION
DOCK1	dedicator of cytokinesis 1								REACTOME_HEMOSTASIS							KEGG_REGULATION_OF_ACTIN_CYTOSKELETON								KEGG_FOCAL_ADHESION
VWF	von Willebrand factor								REACTOME_HEMOSTASIS															KEGG_FOCAL_ADHESION			KEGG_ECM_RECEPTOR_INTERACTION													REACTOME_INTEGRIN_CELL_SURFACE_INTERACTIONS
VASP	vasodilator-stimulated phosphoprotein	REACTOME_IMMUNE_SYSTEM					REACTOME_ADAPTIVE_IMMUNE_SYSTEM																	KEGG_FOCAL_ADHESION									REACTOME_GENERATION_OF_SECOND_MESSENGER_MOLECULES												REACTOME_TCR_SIGNALING
ITGB4	integrin, beta 4															KEGG_REGULATION_OF_ACTIN_CYTOSKELETON								KEGG_FOCAL_ADHESION			KEGG_ECM_RECEPTOR_INTERACTION												KEGG_ARRHYTHMOGENIC_RIGHT_VENTRICULAR_CARDIOMYOPATHY_ARVC	REACTOME_INTEGRIN_CELL_SURFACE_INTERACTIONS		PID_INTEGRIN_CS_PATHWAY
PAK4	p21(CDKN1A)-activated kinase 4															KEGG_REGULATION_OF_ACTIN_CYTOSKELETON								KEGG_FOCAL_ADHESION												KEGG_T_CELL_RECEPTOR_SIGNALING_PATHWAY
PDGFC	platelet derived growth factor C															KEGG_REGULATION_OF_ACTIN_CYTOSKELETON								KEGG_FOCAL_ADHESION																	KEGG_CYTOKINE_CYTOKINE_RECEPTOR_INTERACTION
PDGFD	platelet derived growth factor D															KEGG_REGULATION_OF_ACTIN_CYTOSKELETON								KEGG_FOCAL_ADHESION
COL2A1	collagen, type II, alpha 1 (primary osteoarthritis, spondyloepiphyseal dysplasia, congenital)																				PID_INTEGRIN1_PATHWAY			KEGG_FOCAL_ADHESION			KEGG_ECM_RECEPTOR_INTERACTION													REACTOME_INTEGRIN_CELL_SURFACE_INTERACTIONS
COL5A2	collagen, type V, alpha 2																				PID_INTEGRIN1_PATHWAY			KEGG_FOCAL_ADHESION			KEGG_ECM_RECEPTOR_INTERACTION
SHC3	SHC (Src homology 2 domain containing) transforming protein 3																							KEGG_FOCAL_ADHESION
IRF1	interferon regulatory factor 1	REACTOME_IMMUNE_SYSTEM		REACTOME_CYTOKINE_SIGNALING_IN_IMMUNE_SYSTEM	REACTOME_INTERFERON_SIGNALING				REACTOME_HEMOSTASIS	REACTOME_INTERFERON_ALPHA_BETA_SIGNALING		REACTOME_INTERFERON_GAMMA_SIGNALING
IRF2	interferon regulatory factor 2	REACTOME_IMMUNE_SYSTEM		REACTOME_CYTOKINE_SIGNALING_IN_IMMUNE_SYSTEM	REACTOME_INTERFERON_SIGNALING				REACTOME_HEMOSTASIS	REACTOME_INTERFERON_ALPHA_BETA_SIGNALING		REACTOME_INTERFERON_GAMMA_SIGNALING
ITGB2	integrin, beta 2 (complement component 3 receptor 3 and 4 subunit)	REACTOME_IMMUNE_SYSTEM					REACTOME_ADAPTIVE_IMMUNE_SYSTEM		REACTOME_HEMOSTASIS							KEGG_REGULATION_OF_ACTIN_CYTOSKELETON	KEGG_CELL_ADHESION_MOLECULES_CAMS															REACTOME_IMMUNOREGULATORY_INTERACTIONS_BETWEEN_A_LYMPHOID_AND_A_NON_LYMPHOID_CELL								REACTOME_INTEGRIN_CELL_SURFACE_INTERACTIONS		PID_INTEGRIN_CS_PATHWAY				BIOCARTA_TCYTOTOXIC_PATHWAY	BIOCARTA_THELPER_PATHWAY
LCP2	lymphocyte cytosolic protein 2 (SH2 domain containing leukocyte protein of 76kDa)	REACTOME_IMMUNE_SYSTEM					REACTOME_ADAPTIVE_IMMUNE_SYSTEM		REACTOME_HEMOSTASIS													PID_TCR_PATHWAY				PID_CD8TCRPATHWAY							REACTOME_GENERATION_OF_SECOND_MESSENGER_MOLECULES			KEGG_T_CELL_RECEPTOR_SIGNALING_PATHWAY									REACTOME_TCR_SIGNALING
AMICA1	adhesion molecule, interacts with CXADR antigen 1	REACTOME_IMMUNE_SYSTEM					REACTOME_ADAPTIVE_IMMUNE_SYSTEM		REACTOME_HEMOSTASIS																							REACTOME_IMMUNOREGULATORY_INTERACTIONS_BETWEEN_A_LYMPHOID_AND_A_NON_LYMPHOID_CELL								REACTOME_INTEGRIN_CELL_SURFACE_INTERACTIONS
HSPA5	heat shock 70kDa protein 5 (glucose-regulated protein, 78kDa)	REACTOME_IMMUNE_SYSTEM					REACTOME_ADAPTIVE_IMMUNE_SYSTEM		REACTOME_HEMOSTASIS
KIF5B	kinesin family member 5B	REACTOME_IMMUNE_SYSTEM					REACTOME_ADAPTIVE_IMMUNE_SYSTEM		REACTOME_HEMOSTASIS
KIF11	kinesin family member 11	REACTOME_IMMUNE_SYSTEM					REACTOME_ADAPTIVE_IMMUNE_SYSTEM		REACTOME_HEMOSTASIS
PROS1	protein S (alpha)	REACTOME_IMMUNE_SYSTEM							REACTOME_HEMOSTASIS																																								REACTOME_POST_TRANSLATIONAL_PROTEIN_MODIFICATION
PFN1	profilin 1								REACTOME_HEMOSTASIS							KEGG_REGULATION_OF_ACTIN_CYTOSKELETON
CD2	CD2 molecule								REACTOME_HEMOSTASIS								KEGG_CELL_ADHESION_MOLECULES_CAMS																													BIOCARTA_TCYTOTOXIC_PATHWAY	BIOCARTA_THELPER_PATHWAY
CD58	CD58 molecule								REACTOME_HEMOSTASIS								KEGG_CELL_ADHESION_MOLECULES_CAMS
PLAU	plasminogen activator, urokinase								REACTOME_HEMOSTASIS												PID_INTEGRIN1_PATHWAY							PID_E2F_PATHWAY
F13A1	coagulation factor XIII, A1 polypeptide								REACTOME_HEMOSTASIS												PID_INTEGRIN1_PATHWAY
LAMP2	lysosomal-associated membrane protein 2								REACTOME_HEMOSTASIS																				KEGG_LYSOSOME
DOK2	docking protein 2, 56kDa								REACTOME_HEMOSTASIS																													PID_IL4_2PATHWAY
SLC7A11	solute carrier family 7, (cationic amino acid transporter, y+ system) member 11								REACTOME_HEMOSTASIS																																			REACTOME_TRANSMEMBRANE_TRANSPORT_OF_SMALL_MOLECULES
SLC7A7	solute carrier family 7 (cationic amino acid transporter, y+ system), member 7								REACTOME_HEMOSTASIS																																			REACTOME_TRANSMEMBRANE_TRANSPORT_OF_SMALL_MOLECULES
SLC16A3	solute carrier family 16, member 3 (monocarboxylic acid transporter 4)								REACTOME_HEMOSTASIS																																			REACTOME_TRANSMEMBRANE_TRANSPORT_OF_SMALL_MOLECULES
SLC8A3	solute carrier family 8 (sodium-calcium exchanger), member 3								REACTOME_HEMOSTASIS																																			REACTOME_TRANSMEMBRANE_TRANSPORT_OF_SMALL_MOLECULES
ABCC4	ATP-binding cassette, sub-family C (CFTR/MRP), member 4								REACTOME_HEMOSTASIS																																			REACTOME_TRANSMEMBRANE_TRANSPORT_OF_SMALL_MOLECULES
THBD	thrombomodulin								REACTOME_HEMOSTASIS
SERPING1	serpin peptidase inhibitor, clade G (C1 inhibitor), member 1, (angioedema, hereditary)								REACTOME_HEMOSTASIS
CALU	calumenin								REACTOME_HEMOSTASIS
SPARC	secreted protein, acidic, cysteine-rich (osteonectin)								REACTOME_HEMOSTASIS
STXBP3	syntaxin binding protein 3								REACTOME_HEMOSTASIS
TFPI	tissue factor pathway inhibitor (lipoprotein-associated coagulation inhibitor)								REACTOME_HEMOSTASIS
HIST1H3F	histone cluster 1, H3f								REACTOME_HEMOSTASIS
HIST1H3G	histone cluster 1, H3g								REACTOME_HEMOSTASIS
HIST1H3J	histone cluster 1, H3j								REACTOME_HEMOSTASIS
RAB5A	RAB5A, member RAS oncogene family								REACTOME_HEMOSTASIS
GATA6	GATA binding protein 6								REACTOME_HEMOSTASIS
DOCK8	dedicator of cytokinesis 8								REACTOME_HEMOSTASIS
HMG20B	high-mobility group 20B								REACTOME_HEMOSTASIS
PDE5A	phosphodiesterase 5A, cGMP-specific								REACTOME_HEMOSTASIS
TP53I3	tumor protein p53 inducible protein 3																	PID_P53DOWNSTREAMPATHWAY							KEGG_P53_SIGNALING_PATHWAY
CD82	CD82 molecule																	PID_P53DOWNSTREAMPATHWAY							KEGG_P53_SIGNALING_PATHWAY
RRM2B	ribonucleotide reductase M2 B (TP53 inducible)																	PID_P53DOWNSTREAMPATHWAY							KEGG_P53_SIGNALING_PATHWAY
DDB2	damage-specific DNA binding protein 2, 48kDa																	PID_P53DOWNSTREAMPATHWAY							KEGG_P53_SIGNALING_PATHWAY
CCNG1	cyclin G1																	PID_P53DOWNSTREAMPATHWAY							KEGG_P53_SIGNALING_PATHWAY
PPM1D	protein phosphatase 1D magnesium-dependent, delta isoform																								KEGG_P53_SIGNALING_PATHWAY
GTSE1	G-2 and S-phase expressed 1																								KEGG_P53_SIGNALING_PATHWAY
ZMAT3	zinc finger, matrin type 3																								KEGG_P53_SIGNALING_PATHWAY
SOCS1	suppressor of cytokine signaling 1	REACTOME_IMMUNE_SYSTEM		REACTOME_CYTOKINE_SIGNALING_IN_IMMUNE_SYSTEM	REACTOME_INTERFERON_SIGNALING		REACTOME_ADAPTIVE_IMMUNE_SYSTEM			REACTOME_INTERFERON_ALPHA_BETA_SIGNALING		REACTOME_INTERFERON_GAMMA_SIGNALING		PID_IL12_2PATHWAY																								PID_IL4_2PATHWAY					KEGG_JAK_STAT_SIGNALING_PATHWAY
SOCS3	suppressor of cytokine signaling 3	REACTOME_IMMUNE_SYSTEM		REACTOME_CYTOKINE_SIGNALING_IN_IMMUNE_SYSTEM	REACTOME_INTERFERON_SIGNALING		REACTOME_ADAPTIVE_IMMUNE_SYSTEM			REACTOME_INTERFERON_ALPHA_BETA_SIGNALING		REACTOME_INTERFERON_GAMMA_SIGNALING																										PID_IL4_2PATHWAY					KEGG_JAK_STAT_SIGNALING_PATHWAY
IFITM1	interferon induced transmembrane protein 1 (9-27)	REACTOME_IMMUNE_SYSTEM		REACTOME_CYTOKINE_SIGNALING_IN_IMMUNE_SYSTEM	REACTOME_INTERFERON_SIGNALING		REACTOME_ADAPTIVE_IMMUNE_SYSTEM			REACTOME_INTERFERON_ALPHA_BETA_SIGNALING																						REACTOME_IMMUNOREGULATORY_INTERACTIONS_BETWEEN_A_LYMPHOID_AND_A_NON_LYMPHOID_CELL
B2M	beta-2-microglobulin	REACTOME_IMMUNE_SYSTEM		REACTOME_CYTOKINE_SIGNALING_IN_IMMUNE_SYSTEM	REACTOME_INTERFERON_SIGNALING		REACTOME_ADAPTIVE_IMMUNE_SYSTEM					REACTOME_INTERFERON_GAMMA_SIGNALING		PID_IL12_2PATHWAY												PID_CD8TCRPATHWAY						REACTOME_IMMUNOREGULATORY_INTERACTIONS_BETWEEN_A_LYMPHOID_AND_A_NON_LYMPHOID_CELL					PID_CD8TCRDOWNSTREAMPATHWAY
VCAM1	vascular cell adhesion molecule 1	REACTOME_IMMUNE_SYSTEM		REACTOME_CYTOKINE_SIGNALING_IN_IMMUNE_SYSTEM	REACTOME_INTERFERON_SIGNALING		REACTOME_ADAPTIVE_IMMUNE_SYSTEM					REACTOME_INTERFERON_GAMMA_SIGNALING					KEGG_CELL_ADHESION_MOLECULES_CAMS				PID_INTEGRIN1_PATHWAY											REACTOME_IMMUNOREGULATORY_INTERACTIONS_BETWEEN_A_LYMPHOID_AND_A_NON_LYMPHOID_CELL								REACTOME_INTEGRIN_CELL_SURFACE_INTERACTIONS
NEDD4	neural precursor cell expressed, developmentally down-regulated 4	REACTOME_IMMUNE_SYSTEM		REACTOME_CYTOKINE_SIGNALING_IN_IMMUNE_SYSTEM	REACTOME_INTERFERON_SIGNALING		REACTOME_ADAPTIVE_IMMUNE_SYSTEM
IRF4	interferon regulatory factor 4	REACTOME_IMMUNE_SYSTEM		REACTOME_CYTOKINE_SIGNALING_IN_IMMUNE_SYSTEM	REACTOME_INTERFERON_SIGNALING					REACTOME_INTERFERON_ALPHA_BETA_SIGNALING		REACTOME_INTERFERON_GAMMA_SIGNALING																										PID_IL4_2PATHWAY
IRF8	interferon regulatory factor 8	REACTOME_IMMUNE_SYSTEM		REACTOME_CYTOKINE_SIGNALING_IN_IMMUNE_SYSTEM	REACTOME_INTERFERON_SIGNALING					REACTOME_INTERFERON_ALPHA_BETA_SIGNALING		REACTOME_INTERFERON_GAMMA_SIGNALING
GBP2	guanylate binding protein 2, interferon-inducible	REACTOME_IMMUNE_SYSTEM		REACTOME_CYTOKINE_SIGNALING_IN_IMMUNE_SYSTEM	REACTOME_INTERFERON_SIGNALING					REACTOME_INTERFERON_ALPHA_BETA_SIGNALING		REACTOME_INTERFERON_GAMMA_SIGNALING
OAS2	2'-5'-oligoadenylate synthetase 2, 69/71kDa	REACTOME_IMMUNE_SYSTEM		REACTOME_CYTOKINE_SIGNALING_IN_IMMUNE_SYSTEM	REACTOME_INTERFERON_SIGNALING					REACTOME_INTERFERON_ALPHA_BETA_SIGNALING		REACTOME_INTERFERON_GAMMA_SIGNALING
OAS3	2'-5'-oligoadenylate synthetase 3, 100kDa	REACTOME_IMMUNE_SYSTEM		REACTOME_CYTOKINE_SIGNALING_IN_IMMUNE_SYSTEM	REACTOME_INTERFERON_SIGNALING					REACTOME_INTERFERON_ALPHA_BETA_SIGNALING		REACTOME_INTERFERON_GAMMA_SIGNALING
OASL	2'-5'-oligoadenylate synthetase-like	REACTOME_IMMUNE_SYSTEM		REACTOME_CYTOKINE_SIGNALING_IN_IMMUNE_SYSTEM	REACTOME_INTERFERON_SIGNALING					REACTOME_INTERFERON_ALPHA_BETA_SIGNALING		REACTOME_INTERFERON_GAMMA_SIGNALING
ISG15	ISG15 ubiquitin-like modifier	REACTOME_IMMUNE_SYSTEM		REACTOME_CYTOKINE_SIGNALING_IN_IMMUNE_SYSTEM	REACTOME_INTERFERON_SIGNALING					REACTOME_INTERFERON_ALPHA_BETA_SIGNALING
USP18	ubiquitin specific peptidase 18	REACTOME_IMMUNE_SYSTEM		REACTOME_CYTOKINE_SIGNALING_IN_IMMUNE_SYSTEM	REACTOME_INTERFERON_SIGNALING					REACTOME_INTERFERON_ALPHA_BETA_SIGNALING
IFI27	interferon, alpha-inducible protein 27	REACTOME_IMMUNE_SYSTEM		REACTOME_CYTOKINE_SIGNALING_IN_IMMUNE_SYSTEM	REACTOME_INTERFERON_SIGNALING					REACTOME_INTERFERON_ALPHA_BETA_SIGNALING
IFI35	interferon-induced protein 35	REACTOME_IMMUNE_SYSTEM		REACTOME_CYTOKINE_SIGNALING_IN_IMMUNE_SYSTEM	REACTOME_INTERFERON_SIGNALING					REACTOME_INTERFERON_ALPHA_BETA_SIGNALING
IFI6	interferon, alpha-inducible protein 6	REACTOME_IMMUNE_SYSTEM		REACTOME_CYTOKINE_SIGNALING_IN_IMMUNE_SYSTEM	REACTOME_INTERFERON_SIGNALING					REACTOME_INTERFERON_ALPHA_BETA_SIGNALING
IFITM2	interferon induced transmembrane protein 2 (1-8D)	REACTOME_IMMUNE_SYSTEM		REACTOME_CYTOKINE_SIGNALING_IN_IMMUNE_SYSTEM	REACTOME_INTERFERON_SIGNALING					REACTOME_INTERFERON_ALPHA_BETA_SIGNALING
IFITM3	interferon induced transmembrane protein 3 (1-8U)	REACTOME_IMMUNE_SYSTEM		REACTOME_CYTOKINE_SIGNALING_IN_IMMUNE_SYSTEM	REACTOME_INTERFERON_SIGNALING					REACTOME_INTERFERON_ALPHA_BETA_SIGNALING
ISG20	interferon stimulated exonuclease gene 20kDa	REACTOME_IMMUNE_SYSTEM		REACTOME_CYTOKINE_SIGNALING_IN_IMMUNE_SYSTEM	REACTOME_INTERFERON_SIGNALING					REACTOME_INTERFERON_ALPHA_BETA_SIGNALING
SP100	SP100 nuclear antigen	REACTOME_IMMUNE_SYSTEM		REACTOME_CYTOKINE_SIGNALING_IN_IMMUNE_SYSTEM	REACTOME_INTERFERON_SIGNALING							REACTOME_INTERFERON_GAMMA_SIGNALING
GBP1	guanylate binding protein 1, interferon-inducible, 67kDa	REACTOME_IMMUNE_SYSTEM		REACTOME_CYTOKINE_SIGNALING_IN_IMMUNE_SYSTEM	REACTOME_INTERFERON_SIGNALING							REACTOME_INTERFERON_GAMMA_SIGNALING
GBP4	guanylate binding protein 4	REACTOME_IMMUNE_SYSTEM		REACTOME_CYTOKINE_SIGNALING_IN_IMMUNE_SYSTEM	REACTOME_INTERFERON_SIGNALING							REACTOME_INTERFERON_GAMMA_SIGNALING
GBP5	guanylate binding protein 5	REACTOME_IMMUNE_SYSTEM		REACTOME_CYTOKINE_SIGNALING_IN_IMMUNE_SYSTEM	REACTOME_INTERFERON_SIGNALING							REACTOME_INTERFERON_GAMMA_SIGNALING
GBP7	guanylate binding protein 7	REACTOME_IMMUNE_SYSTEM		REACTOME_CYTOKINE_SIGNALING_IN_IMMUNE_SYSTEM	REACTOME_INTERFERON_SIGNALING							REACTOME_INTERFERON_GAMMA_SIGNALING
DDX58	DEAD (Asp-Glu-Ala-Asp) box polypeptide 58	REACTOME_IMMUNE_SYSTEM		REACTOME_CYTOKINE_SIGNALING_IN_IMMUNE_SYSTEM	REACTOME_INTERFERON_SIGNALING
TRIM25	tripartite motif-containing 25	REACTOME_IMMUNE_SYSTEM		REACTOME_CYTOKINE_SIGNALING_IN_IMMUNE_SYSTEM	REACTOME_INTERFERON_SIGNALING
HERC5	hect domain and RLD 5	REACTOME_IMMUNE_SYSTEM		REACTOME_CYTOKINE_SIGNALING_IN_IMMUNE_SYSTEM	REACTOME_INTERFERON_SIGNALING
MAP3K8	mitogen-activated protein kinase kinase kinase 8	REACTOME_IMMUNE_SYSTEM		REACTOME_CYTOKINE_SIGNALING_IN_IMMUNE_SYSTEM			REACTOME_ADAPTIVE_IMMUNE_SYSTEM															PID_TCR_PATHWAY				PID_CD8TCRPATHWAY										KEGG_T_CELL_RECEPTOR_SIGNALING_PATHWAY
IL2RG	interleukin 2 receptor, gamma (severe combined immunodeficiency)	REACTOME_IMMUNE_SYSTEM		REACTOME_CYTOKINE_SIGNALING_IN_IMMUNE_SYSTEM										PID_IL12_2PATHWAY																					KEGG_PRIMARY_IMMUNODEFICIENCY		PID_CD8TCRDOWNSTREAMPATHWAY	PID_IL4_2PATHWAY			KEGG_CYTOKINE_CYTOKINE_RECEPTOR_INTERACTION		KEGG_JAK_STAT_SIGNALING_PATHWAY
IL2RB	interleukin 2 receptor, beta	REACTOME_IMMUNE_SYSTEM		REACTOME_CYTOKINE_SIGNALING_IN_IMMUNE_SYSTEM										PID_IL12_2PATHWAY																							PID_CD8TCRDOWNSTREAMPATHWAY				KEGG_CYTOKINE_CYTOKINE_RECEPTOR_INTERACTION		KEGG_JAK_STAT_SIGNALING_PATHWAY
IL7R	interleukin 7 receptor	REACTOME_IMMUNE_SYSTEM		REACTOME_CYTOKINE_SIGNALING_IN_IMMUNE_SYSTEM																															KEGG_PRIMARY_IMMUNODEFICIENCY						KEGG_CYTOKINE_CYTOKINE_RECEPTOR_INTERACTION		KEGG_JAK_STAT_SIGNALING_PATHWAY
IRS1	insulin receptor substrate 1	REACTOME_IMMUNE_SYSTEM		REACTOME_CYTOKINE_SIGNALING_IN_IMMUNE_SYSTEM																																		PID_IL4_2PATHWAY
PRLR	prolactin receptor	REACTOME_IMMUNE_SYSTEM		REACTOME_CYTOKINE_SIGNALING_IN_IMMUNE_SYSTEM																																					KEGG_CYTOKINE_CYTOKINE_RECEPTOR_INTERACTION		KEGG_JAK_STAT_SIGNALING_PATHWAY
IRAK4	interleukin-1 receptor-associated kinase 4	REACTOME_IMMUNE_SYSTEM		REACTOME_CYTOKINE_SIGNALING_IN_IMMUNE_SYSTEM
PELI1	pellino homolog 1 (Drosophila)	REACTOME_IMMUNE_SYSTEM		REACTOME_CYTOKINE_SIGNALING_IN_IMMUNE_SYSTEM
CD8A	CD8a molecule	REACTOME_IMMUNE_SYSTEM					REACTOME_ADAPTIVE_IMMUNE_SYSTEM							PID_IL12_2PATHWAY			KEGG_CELL_ADHESION_MOLECULES_CAMS									PID_CD8TCRPATHWAY						REACTOME_IMMUNOREGULATORY_INTERACTIONS_BETWEEN_A_LYMPHOID_AND_A_NON_LYMPHOID_CELL			KEGG_PRIMARY_IMMUNODEFICIENCY	KEGG_T_CELL_RECEPTOR_SIGNALING_PATHWAY	PID_CD8TCRDOWNSTREAMPATHWAY									BIOCARTA_TCYTOTOXIC_PATHWAY
CD8B	CD8b molecule	REACTOME_IMMUNE_SYSTEM					REACTOME_ADAPTIVE_IMMUNE_SYSTEM							PID_IL12_2PATHWAY			KEGG_CELL_ADHESION_MOLECULES_CAMS									PID_CD8TCRPATHWAY						REACTOME_IMMUNOREGULATORY_INTERACTIONS_BETWEEN_A_LYMPHOID_AND_A_NON_LYMPHOID_CELL			KEGG_PRIMARY_IMMUNODEFICIENCY	KEGG_T_CELL_RECEPTOR_SIGNALING_PATHWAY	PID_CD8TCRDOWNSTREAMPATHWAY
CD86	CD86 molecule	REACTOME_IMMUNE_SYSTEM					REACTOME_ADAPTIVE_IMMUNE_SYSTEM										KEGG_CELL_ADHESION_MOLECULES_CAMS					PID_TCR_PATHWAY				PID_CD8TCRPATHWAY
ICOS	inducible T-cell co-stimulator	REACTOME_IMMUNE_SYSTEM					REACTOME_ADAPTIVE_IMMUNE_SYSTEM										KEGG_CELL_ADHESION_MOLECULES_CAMS																		KEGG_PRIMARY_IMMUNODEFICIENCY	KEGG_T_CELL_RECEPTOR_SIGNALING_PATHWAY
CTSD	cathepsin D (lysosomal aspartyl peptidase)	REACTOME_IMMUNE_SYSTEM					REACTOME_ADAPTIVE_IMMUNE_SYSTEM											PID_P53DOWNSTREAMPATHWAY											KEGG_LYSOSOME
ZAP70	zeta-chain (TCR) associated protein kinase 70kDa	REACTOME_IMMUNE_SYSTEM					REACTOME_ADAPTIVE_IMMUNE_SYSTEM															PID_TCR_PATHWAY				PID_CD8TCRPATHWAY				BIOCARTA_TCRA_PATHWAY			REACTOME_GENERATION_OF_SECOND_MESSENGER_MOLECULES		KEGG_PRIMARY_IMMUNODEFICIENCY	KEGG_T_CELL_RECEPTOR_SIGNALING_PATHWAY									REACTOME_TCR_SIGNALING
ITK	IL2-inducible T-cell kinase	REACTOME_IMMUNE_SYSTEM					REACTOME_ADAPTIVE_IMMUNE_SYSTEM															PID_TCR_PATHWAY											REACTOME_GENERATION_OF_SECOND_MESSENGER_MOLECULES			KEGG_T_CELL_RECEPTOR_SIGNALING_PATHWAY									REACTOME_TCR_SIGNALING
FYB	FYN binding protein (FYB-120/130)	REACTOME_IMMUNE_SYSTEM					REACTOME_ADAPTIVE_IMMUNE_SYSTEM															PID_TCR_PATHWAY											REACTOME_GENERATION_OF_SECOND_MESSENGER_MOLECULES												REACTOME_TCR_SIGNALING
CTSS	cathepsin S	REACTOME_IMMUNE_SYSTEM					REACTOME_ADAPTIVE_IMMUNE_SYSTEM																						KEGG_LYSOSOME
CTSC	cathepsin C	REACTOME_IMMUNE_SYSTEM					REACTOME_ADAPTIVE_IMMUNE_SYSTEM																						KEGG_LYSOSOME
CTSL2	cathepsin L2	REACTOME_IMMUNE_SYSTEM					REACTOME_ADAPTIVE_IMMUNE_SYSTEM																						KEGG_LYSOSOME
CTSO	cathepsin O	REACTOME_IMMUNE_SYSTEM					REACTOME_ADAPTIVE_IMMUNE_SYSTEM																						KEGG_LYSOSOME
KLRK1	killer cell lectin-like receptor subfamily K, member 1	REACTOME_IMMUNE_SYSTEM					REACTOME_ADAPTIVE_IMMUNE_SYSTEM																									REACTOME_IMMUNOREGULATORY_INTERACTIONS_BETWEEN_A_LYMPHOID_AND_A_NON_LYMPHOID_CELL
CD200R1	CD200 receptor 1	REACTOME_IMMUNE_SYSTEM					REACTOME_ADAPTIVE_IMMUNE_SYSTEM																									REACTOME_IMMUNOREGULATORY_INTERACTIONS_BETWEEN_A_LYMPHOID_AND_A_NON_LYMPHOID_CELL
CD96	CD96 molecule	REACTOME_IMMUNE_SYSTEM					REACTOME_ADAPTIVE_IMMUNE_SYSTEM																									REACTOME_IMMUNOREGULATORY_INTERACTIONS_BETWEEN_A_LYMPHOID_AND_A_NON_LYMPHOID_CELL
LILRB4	leukocyte immunoglobulin-like receptor, subfamily B (with TM and ITIM domains), member 4	REACTOME_IMMUNE_SYSTEM					REACTOME_ADAPTIVE_IMMUNE_SYSTEM																									REACTOME_IMMUNOREGULATORY_INTERACTIONS_BETWEEN_A_LYMPHOID_AND_A_NON_LYMPHOID_CELL
TNFRSF14	tumor necrosis factor receptor superfamily, member 14 (herpesvirus entry mediator)	REACTOME_IMMUNE_SYSTEM					REACTOME_ADAPTIVE_IMMUNE_SYSTEM																																		KEGG_CYTOKINE_CYTOKINE_RECEPTOR_INTERACTION
TRAT1	T cell receptor associated transmembrane adaptor 1	REACTOME_IMMUNE_SYSTEM					REACTOME_ADAPTIVE_IMMUNE_SYSTEM																																						REACTOME_TCR_SIGNALING
CALR	calreticulin	REACTOME_IMMUNE_SYSTEM					REACTOME_ADAPTIVE_IMMUNE_SYSTEM																																										REACTOME_POST_TRANSLATIONAL_PROTEIN_MODIFICATION
CD74	CD74 molecule, major histocompatibility complex, class II invariant chain	REACTOME_IMMUNE_SYSTEM					REACTOME_ADAPTIVE_IMMUNE_SYSTEM
SEC61G	Sec61 gamma subunit	REACTOME_IMMUNE_SYSTEM					REACTOME_ADAPTIVE_IMMUNE_SYSTEM
TRIM21	tripartite motif-containing 21	REACTOME_IMMUNE_SYSTEM					REACTOME_ADAPTIVE_IMMUNE_SYSTEM
MRC1	mannose receptor, C type 1	REACTOME_IMMUNE_SYSTEM					REACTOME_ADAPTIVE_IMMUNE_SYSTEM
MRC2	mannose receptor, C type 2	REACTOME_IMMUNE_SYSTEM					REACTOME_ADAPTIVE_IMMUNE_SYSTEM
ASB2	ankyrin repeat and SOCS box-containing 2	REACTOME_IMMUNE_SYSTEM					REACTOME_ADAPTIVE_IMMUNE_SYSTEM
ASB9	ankyrin repeat and SOCS box-containing 9	REACTOME_IMMUNE_SYSTEM					REACTOME_ADAPTIVE_IMMUNE_SYSTEM
RNF138	ring finger protein 138	REACTOME_IMMUNE_SYSTEM					REACTOME_ADAPTIVE_IMMUNE_SYSTEM
RNF182	ring finger protein 182	REACTOME_IMMUNE_SYSTEM					REACTOME_ADAPTIVE_IMMUNE_SYSTEM
PIK3AP1	phosphoinositide-3-kinase adaptor protein 1	REACTOME_IMMUNE_SYSTEM					REACTOME_ADAPTIVE_IMMUNE_SYSTEM
C1QA	complement component 1, q subcomponent, A chain	REACTOME_IMMUNE_SYSTEM
C1QB	complement component 1, q subcomponent, B chain	REACTOME_IMMUNE_SYSTEM
C1QC	complement component 1, q subcomponent, C chain	REACTOME_IMMUNE_SYSTEM
TLR4	toll-like receptor 4	REACTOME_IMMUNE_SYSTEM
TLR3	toll-like receptor 3	REACTOME_IMMUNE_SYSTEM
TLR8	toll-like receptor 8	REACTOME_IMMUNE_SYSTEM
TICAM2	toll-like receptor adaptor molecule 2	REACTOME_IMMUNE_SYSTEM
IFIH1	interferon induced with helicase C domain 1	REACTOME_IMMUNE_SYSTEM
UNC93B1	unc-93 homolog B1 (C. elegans)	REACTOME_IMMUNE_SYSTEM
PSTPIP1	proline-serine-threonine phosphatase interacting protein 1	REACTOME_IMMUNE_SYSTEM
GZMB	granzyme B (granzyme 2, cytotoxic T-lymphocyte-associated serine esterase 1)													PID_IL12_2PATHWAY																							PID_CD8TCRDOWNSTREAMPATHWAY
EOMES	eomesodermin homolog (Xenopus laevis)													PID_IL12_2PATHWAY																							PID_CD8TCRDOWNSTREAMPATHWAY
ITGAD	integrin, alpha D															KEGG_REGULATION_OF_ACTIN_CYTOSKELETON																										PID_INTEGRIN_CS_PATHWAY
MYH14	myosin, heavy chain 14															KEGG_REGULATION_OF_ACTIN_CYTOSKELETON
MYH9	myosin, heavy chain 9, non-muscle															KEGG_REGULATION_OF_ACTIN_CYTOSKELETON
GSN	gelsolin (amyloidosis, Finnish type)															KEGG_REGULATION_OF_ACTIN_CYTOSKELETON
ARPC5	actin related protein 2/3 complex, subunit 5, 16kDa															KEGG_REGULATION_OF_ACTIN_CYTOSKELETON
WASF2	WAS protein family, member 2															KEGG_REGULATION_OF_ACTIN_CYTOSKELETON
IQGAP3	IQ motif containing GTPase activating protein 3															KEGG_REGULATION_OF_ACTIN_CYTOSKELETON
TMSL3	thymosin-like 3															KEGG_REGULATION_OF_ACTIN_CYTOSKELETON
SDC2	syndecan 2 (heparan sulfate proteoglycan 1, cell surface-associated, fibroglycan)																KEGG_CELL_ADHESION_MOLECULES_CAMS										KEGG_ECM_RECEPTOR_INTERACTION
SDC1	syndecan 1																KEGG_CELL_ADHESION_MOLECULES_CAMS										KEGG_ECM_RECEPTOR_INTERACTION
CDH2	cadherin 2, type 1, N-cadherin (neuronal)																KEGG_CELL_ADHESION_MOLECULES_CAMS																						KEGG_ARRHYTHMOGENIC_RIGHT_VENTRICULAR_CARDIOMYOPATHY_ARVC
ALCAM	activated leukocyte cell adhesion molecule																KEGG_CELL_ADHESION_MOLECULES_CAMS
HLA-DQB1	major histocompatibility complex, class II, DQ beta 1																KEGG_CELL_ADHESION_MOLECULES_CAMS
OCLN	occludin																KEGG_CELL_ADHESION_MOLECULES_CAMS
CLDN17	claudin 17																KEGG_CELL_ADHESION_MOLECULES_CAMS
NCAM2	neural cell adhesion molecule 2																KEGG_CELL_ADHESION_MOLECULES_CAMS
CD6	CD6 molecule																KEGG_CELL_ADHESION_MOLECULES_CAMS
SIGLEC1	sialic acid binding Ig-like lectin 1, sialoadhesin																KEGG_CELL_ADHESION_MOLECULES_CAMS
MCL1	myeloid cell leukemia sequence 1 (BCL2-related)																	PID_P53DOWNSTREAMPATHWAY										PID_E2F_PATHWAY
TNFRSF10A	tumor necrosis factor receptor superfamily, member 10a																	PID_P53DOWNSTREAMPATHWAY																							KEGG_CYTOKINE_CYTOKINE_RECEPTOR_INTERACTION
TNFRSF10D	tumor necrosis factor receptor superfamily, member 10d, decoy with truncated death domain																	PID_P53DOWNSTREAMPATHWAY																							KEGG_CYTOKINE_CYTOKINE_RECEPTOR_INTERACTION
S100A2	S100 calcium binding protein A2																	PID_P53DOWNSTREAMPATHWAY
FDXR	ferredoxin reductase																	PID_P53DOWNSTREAMPATHWAY
RPS27L	ribosomal protein S27-like																	PID_P53DOWNSTREAMPATHWAY
FOXA1	forkhead box A1																	PID_P53DOWNSTREAMPATHWAY
BTG2	BTG family, member 2																	PID_P53DOWNSTREAMPATHWAY
PPM1J	protein phosphatase 1J (PP2C domain containing)																	PID_P53DOWNSTREAMPATHWAY
PRDM1	PR domain containing 1, with ZNF domain																	PID_P53DOWNSTREAMPATHWAY
COL4A5	collagen, type IV, alpha 5 (Alport syndrome)																				PID_INTEGRIN1_PATHWAY																			REACTOME_INTEGRIN_CELL_SURFACE_INTERACTIONS
FBN1	fibrillin 1																				PID_INTEGRIN1_PATHWAY																			REACTOME_INTEGRIN_CELL_SURFACE_INTERACTIONS
MDK	midkine (neurite growth-promoting factor 2)																				PID_INTEGRIN1_PATHWAY
MAP4K1	mitogen-activated protein kinase kinase kinase kinase 1																					PID_TCR_PATHWAY
PRF1	perforin 1 (pore forming protein)																									PID_CD8TCRPATHWAY											PID_CD8TCRDOWNSTREAMPATHWAY
DAG1	dystroglycan 1 (dystrophin-associated glycoprotein 1)																										KEGG_ECM_RECEPTOR_INTERACTION												KEGG_ARRHYTHMOGENIC_RIGHT_VENTRICULAR_CARDIOMYOPATHY_ARVC
HSPG2	heparan sulfate proteoglycan 2 (perlecan)																										KEGG_ECM_RECEPTOR_INTERACTION
HMMR	hyaluronan-mediated motility receptor (RHAMM)																										KEGG_ECM_RECEPTOR_INTERACTION
TK1	thymidine kinase 1, soluble																											PID_E2F_PATHWAY
SIRT1	sirtuin (silent mating type information regulation 2 homolog) 1 (S. cerevisiae)																											PID_E2F_PATHWAY
CASP7	caspase 7, apoptosis-related cysteine peptidase																											PID_E2F_PATHWAY
RBBP8	retinoblastoma binding protein 8																											PID_E2F_PATHWAY
E2F7	E2F transcription factor 7																											PID_E2F_PATHWAY
GNS	glucosamine (N-acetyl)-6-sulfatase (Sanfilippo disease IIID)																												KEGG_LYSOSOME
GALC	galactosylceramidase																												KEGG_LYSOSOME
GM2A	GM2 ganglioside activator																												KEGG_LYSOSOME
CTSZ	cathepsin Z																												KEGG_LYSOSOME
DNASE2	deoxyribonuclease II, lysosomal																												KEGG_LYSOSOME
IGF2R	insulin-like growth factor 2 receptor																												KEGG_LYSOSOME
NAGA	N-acetylgalactosaminidase, alpha-																												KEGG_LYSOSOME
FUCA1	fucosidase, alpha-L- 1, tissue																												KEGG_LYSOSOME
CD164	CD164 molecule, sialomucin																												KEGG_LYSOSOME
LAMP3	lysosomal-associated membrane protein 3																												KEGG_LYSOSOME
LAPTM4A	lysosomal-associated protein transmembrane 4 alpha																												KEGG_LYSOSOME
LAPTM4B	lysosomal associated protein transmembrane 4 beta																												KEGG_LYSOSOME
LAPTM5	lysosomal associated multispanning membrane protein 5																												KEGG_LYSOSOME
NPC2	Niemann-Pick disease, type C2																												KEGG_LYSOSOME
OR2AG2	olfactory receptor, family 2, subfamily AG, member 2																																	KEGG_OLFACTORY_TRANSDUCTION
NFATC2	nuclear factor of activated T-cells, cytoplasmic, calcineurin-dependent 2																																			KEGG_T_CELL_RECEPTOR_SIGNALING_PATHWAY	PID_CD8TCRDOWNSTREAMPATHWAY
NFATC4	nuclear factor of activated T-cells, cytoplasmic, calcineurin-dependent 4																																			KEGG_T_CELL_RECEPTOR_SIGNALING_PATHWAY
JUNB	jun B proto-oncogene																																				PID_CD8TCRDOWNSTREAMPATHWAY
PTPN7	protein tyrosine phosphatase, non-receptor type 7																																				PID_CD8TCRDOWNSTREAMPATHWAY
IL13RA1	interleukin 13 receptor, alpha 1																																					PID_IL4_2PATHWAY			KEGG_CYTOKINE_CYTOKINE_RECEPTOR_INTERACTION		KEGG_JAK_STAT_SIGNALING_PATHWAY
RPS6KB1	ribosomal protein S6 kinase, 70kDa, polypeptide 1																																					PID_IL4_2PATHWAY
MYBL1	v-myb myeloblastosis viral oncogene homolog (avian)-like 1																																					PID_IL4_2PATHWAY
PARP14	poly (ADP-ribose) polymerase family, member 14																																					PID_IL4_2PATHWAY
GJA1	gap junction protein, alpha 1, 43kDa (connexin 43)																																						KEGG_ARRHYTHMOGENIC_RIGHT_VENTRICULAR_CARDIOMYOPATHY_ARVC
DSG2	desmoglein 2																																						KEGG_ARRHYTHMOGENIC_RIGHT_VENTRICULAR_CARDIOMYOPATHY_ARVC
SGCG	sarcoglycan, gamma (35kDa dystrophin-associated glycoprotein)																																						KEGG_ARRHYTHMOGENIC_RIGHT_VENTRICULAR_CARDIOMYOPATHY_ARVC
DSC2	desmocollin 2																																						KEGG_ARRHYTHMOGENIC_RIGHT_VENTRICULAR_CARDIOMYOPATHY_ARVC
IL10RA	interleukin 10 receptor, alpha																																								KEGG_CYTOKINE_CYTOKINE_RECEPTOR_INTERACTION		KEGG_JAK_STAT_SIGNALING_PATHWAY
IL15	interleukin 15																																								KEGG_CYTOKINE_CYTOKINE_RECEPTOR_INTERACTION		KEGG_JAK_STAT_SIGNALING_PATHWAY
CLCF1	cardiotrophin-like cytokine factor 1																																								KEGG_CYTOKINE_CYTOKINE_RECEPTOR_INTERACTION		KEGG_JAK_STAT_SIGNALING_PATHWAY
OSMR	oncostatin M receptor																																								KEGG_CYTOKINE_CYTOKINE_RECEPTOR_INTERACTION		KEGG_JAK_STAT_SIGNALING_PATHWAY
TNFSF10	tumor necrosis factor (ligand) superfamily, member 10																																								KEGG_CYTOKINE_CYTOKINE_RECEPTOR_INTERACTION
BMP7	bone morphogenetic protein 7 (osteogenic protein 1)																																								KEGG_CYTOKINE_CYTOKINE_RECEPTOR_INTERACTION
BMPR1B	bone morphogenetic protein receptor, type IB																																								KEGG_CYTOKINE_CYTOKINE_RECEPTOR_INTERACTION
INHBB	inhibin, beta B (activin AB beta polypeptide)																																								KEGG_CYTOKINE_CYTOKINE_RECEPTOR_INTERACTION
EDA2R	ectodysplasin A2 receptor																																								KEGG_CYTOKINE_CYTOKINE_RECEPTOR_INTERACTION
TNFRSF19	tumor necrosis factor receptor superfamily, member 19																																								KEGG_CYTOKINE_CYTOKINE_RECEPTOR_INTERACTION
SPRED1	sprouty-related, EVH1 domain containing 1																																										KEGG_JAK_STAT_SIGNALING_PATHWAY
SOCS4	suppressor of cytokine signaling 4																																										KEGG_JAK_STAT_SIGNALING_PATHWAY
HK2	hexokinase 2																																											REACTOME_TRANSMEMBRANE_TRANSPORT_OF_SMALL_MOLECULES
SLC30A5	solute carrier family 30 (zinc transporter), member 5																																											REACTOME_TRANSMEMBRANE_TRANSPORT_OF_SMALL_MOLECULES
G6PC3	glucose 6 phosphatase, catalytic, 3																																											REACTOME_TRANSMEMBRANE_TRANSPORT_OF_SMALL_MOLECULES
SLC44A2	solute carrier family 44, member 2																																											REACTOME_TRANSMEMBRANE_TRANSPORT_OF_SMALL_MOLECULES
SLC6A14	solute carrier family 6 (amino acid transporter), member 14																																											REACTOME_TRANSMEMBRANE_TRANSPORT_OF_SMALL_MOLECULES
SLC1A5	solute carrier family 1 (neutral amino acid transporter), member 5																																											REACTOME_TRANSMEMBRANE_TRANSPORT_OF_SMALL_MOLECULES
SLC7A2	solute carrier family 7 (cationic amino acid transporter, y+ system), member 2																																											REACTOME_TRANSMEMBRANE_TRANSPORT_OF_SMALL_MOLECULES
SLC7A3	solute carrier family 7 (cationic amino acid transporter, y+ system), member 3																																											REACTOME_TRANSMEMBRANE_TRANSPORT_OF_SMALL_MOLECULES
SLC2A10	solute carrier family 2 (facilitated glucose transporter), member 10																																											REACTOME_TRANSMEMBRANE_TRANSPORT_OF_SMALL_MOLECULES
SLC2A12	solute carrier family 2 (facilitated glucose transporter), member 12																																											REACTOME_TRANSMEMBRANE_TRANSPORT_OF_SMALL_MOLECULES
SLC40A1	solute carrier family 40 (iron-regulated transporter), member 1																																											REACTOME_TRANSMEMBRANE_TRANSPORT_OF_SMALL_MOLECULES
SLC30A1	solute carrier family 30 (zinc transporter), member 1																																											REACTOME_TRANSMEMBRANE_TRANSPORT_OF_SMALL_MOLECULES
SLC12A2	solute carrier family 12 (sodium/potassium/chloride transporters), member 2																																											REACTOME_TRANSMEMBRANE_TRANSPORT_OF_SMALL_MOLECULES
SLC9A2	solute carrier family 9 (sodium/hydrogen exchanger), member 2																																											REACTOME_TRANSMEMBRANE_TRANSPORT_OF_SMALL_MOLECULES
SLC33A1	solute carrier family 33 (acetyl-CoA transporter), member 1																																											REACTOME_TRANSMEMBRANE_TRANSPORT_OF_SMALL_MOLECULES
SLC35A3	solute carrier family 35 (UDP-N-acetylglucosamine (UDP-GlcNAc) transporter), member A3																																											REACTOME_TRANSMEMBRANE_TRANSPORT_OF_SMALL_MOLECULES
SLC35D2	solute carrier family 35, member D2																																											REACTOME_TRANSMEMBRANE_TRANSPORT_OF_SMALL_MOLECULES
HMOX1	heme oxygenase (decycling) 1																																											REACTOME_TRANSMEMBRANE_TRANSPORT_OF_SMALL_MOLECULES
ATP6V1G1	ATPase, H+ transporting, lysosomal 13kDa, V1 subunit G1																																											REACTOME_TRANSMEMBRANE_TRANSPORT_OF_SMALL_MOLECULES
ATP11C	ATPase, Class VI, type 11C																																											REACTOME_TRANSMEMBRANE_TRANSPORT_OF_SMALL_MOLECULES
ATP7A	ATPase, Cu++ transporting, alpha polypeptide (Menkes syndrome)																																											REACTOME_TRANSMEMBRANE_TRANSPORT_OF_SMALL_MOLECULES
ATP8B1	ATPase, Class I, type 8B, member 1																																											REACTOME_TRANSMEMBRANE_TRANSPORT_OF_SMALL_MOLECULES
ATP8B3	ATPase, Class I, type 8B, member 3																																											REACTOME_TRANSMEMBRANE_TRANSPORT_OF_SMALL_MOLECULES
CYBRD1	cytochrome b reductase 1																																											REACTOME_TRANSMEMBRANE_TRANSPORT_OF_SMALL_MOLECULES
ABCD3	ATP-binding cassette, sub-family D (ALD), member 3																																											REACTOME_TRANSMEMBRANE_TRANSPORT_OF_SMALL_MOLECULES
AQP3	aquaporin 3 (Gill blood group)																																											REACTOME_TRANSMEMBRANE_TRANSPORT_OF_SMALL_MOLECULES
TTK	TTK protein kinase																																															KEGG_CELL_CYCLE
B4GALT1	UDP-Gal:betaGlcNAc beta 1,4- galactosyltransferase, polypeptide 1																																																REACTOME_POST_TRANSLATIONAL_PROTEIN_MODIFICATION
B4GALT4	UDP-Gal:betaGlcNAc beta 1,4- galactosyltransferase, polypeptide 4																																																REACTOME_POST_TRANSLATIONAL_PROTEIN_MODIFICATION
LMAN1	lectin, mannose-binding, 1																																																REACTOME_POST_TRANSLATIONAL_PROTEIN_MODIFICATION
ST8SIA6	ST8 alpha-N-acetyl-neuraminide alpha-2,8-sialyltransferase 6																																																REACTOME_POST_TRANSLATIONAL_PROTEIN_MODIFICATION
FUT8	fucosyltransferase 8 (alpha (1,6) fucosyltransferase)																																																REACTOME_POST_TRANSLATIONAL_PROTEIN_MODIFICATION
MAN1A1	mannosidase, alpha, class 1A, member 1																																																REACTOME_POST_TRANSLATIONAL_PROTEIN_MODIFICATION
MANEA	mannosidase, endo-alpha																																																REACTOME_POST_TRANSLATIONAL_PROTEIN_MODIFICATION
ALG11	asparagine-linked glycosylation 11 homolog (S. cerevisiae, alpha-1,2-mannosyltransferase)																																																REACTOME_POST_TRANSLATIONAL_PROTEIN_MODIFICATION
RFT1	RFT1 homolog (S. cerevisiae)																																																REACTOME_POST_TRANSLATIONAL_PROTEIN_MODIFICATION
C1GALT1C1	C1GALT1-specific chaperone 1																																																REACTOME_POST_TRANSLATIONAL_PROTEIN_MODIFICATION
GALNT1	UDP-N-acetyl-alpha-D-galactosamine:polypeptide N-acetylgalactosaminyltransferase 1 (GalNAc-T1)																																																REACTOME_POST_TRANSLATIONAL_PROTEIN_MODIFICATION
GALNT12	UDP-N-acetyl-alpha-D-galactosamine:polypeptide N-acetylgalactosaminyltransferase 12 (GalNAc-T12)																																																REACTOME_POST_TRANSLATIONAL_PROTEIN_MODIFICATION
GALNT7	UDP-N-acetyl-alpha-D-galactosamine:polypeptide N-acetylgalactosaminyltransferase 7 (GalNAc-T7)																																																REACTOME_POST_TRANSLATIONAL_PROTEIN_MODIFICATION
WBSCR17	Williams-Beuren syndrome chromosome region 17																																																REACTOME_POST_TRANSLATIONAL_PROTEIN_MODIFICATION
MUC16	mucin 16, cell surface associated																																																REACTOME_POST_TRANSLATIONAL_PROTEIN_MODIFICATION
MUC7	mucin 7, secreted																																																REACTOME_POST_TRANSLATIONAL_PROTEIN_MODIFICATION
ST6GALNAC2	ST6 (alpha-N-acetyl-neuraminyl-2,3-beta-galactosyl-1,3)-N-acetylgalactosaminide alpha-2,6-sialyltransferase 2																																																REACTOME_POST_TRANSLATIONAL_PROTEIN_MODIFICATION
PIGM	phosphatidylinositol glycan anchor biosynthesis, class M																																																REACTOME_POST_TRANSLATIONAL_PROTEIN_MODIFICATION
PIGO	phosphatidylinositol glycan anchor biosynthesis, class O																																																REACTOME_POST_TRANSLATIONAL_PROTEIN_MODIFICATION
PIGT	phosphatidylinositol glycan anchor biosynthesis, class T																																																REACTOME_POST_TRANSLATIONAL_PROTEIN_MODIFICATION
IL17RD	interleukin 17 receptor D
IKZF3	IKAROS family zinc finger 3 (Aiolos)
[truncated: 2 more columns]
