# Supplementary material for: Whole Exome- and mRNA-Sequencing of an AT/RT Case Reveals Few Somatic Mutations and Several Deregulated Signalling Pathways in the Context of SMARCB1 Deficiency
Source: Biomed Res Int. 2015 Aug 12;2015:862039. doi: 10.1155/2015/862039 (PMC4780067; doi:10.1155/2015/862039)
Supplement: Supplementary file 1 — Supl. Table 1A. Read mapping and coverage data. Exome-seq Data. Supl. Table 1B. Read mapping mRNA-seq data. Supl. Table 2. Germline variants with RNA variants and DE genes indicated. Supl. Table 3. Cuffdiff results, significantly DE genes with BMP-genes indicated. Supl. Table 4. Gene set overlap for up regulated genes. Supl. Table 5. Gene set overlap for down regulated genes. Supl. Table 6. GO for up regulated genes. Supl. Table 7. GO for down regulated genes. Supl. Fig. 1. FPKM values for the two CCDS SMARCB1 transcripts for AT/RT and Controls. NCBI accession nomenclature is used. Supl. Fig. 2. RNA reads alignment at exon 2 of SMARCB1. Genomic region Chr. 22: 24134055- 24134081 is indicated between the two red vertical lines. The yellow region on the top, represents exon 2, with introns on both sides, shown in blue. Aligned paired reads are shown in blue, while single reads are shown in red or green. Dotted lines connect each end of a read, that have been mapped across exon-exon boundaries. [file 862039.f1.zip › 862039 supl table 5 gene set overlap down regul genes.xlsx]

## Sheet: Sheet1
Gene Set Name	# Genes in Gene Set (K)	Description	# Genes in Overlap (k)	k/K	p-value	FDR q-value
REACTOME_SIGNALING_BY_GPCR	920	Genes involved in Signaling by GPCR	95	0.1033	0	0
REACTOME_HEMOSTASIS	466	Genes involved in Hemostasis	62	0.133	0	0
REACTOME_DEVELOPMENTAL_BIOLOGY	396	Genes involved in Developmental Biology	70	0.1768	0	0
REACTOME_TRANSMEMBRANE_TRANSPORT_OF_SMALL_MOLECULES	413	Genes involved in Transmembrane transport of small molecules	76	0.184	0	0
KEGG_MAPK_SIGNALING_PATHWAY	267	MAPK signaling pathway	54	0.2022	0	0
KEGG_NEUROACTIVE_LIGAND_RECEPTOR_INTERACTION	272	Neuroactive ligand-receptor interaction	62	0.2279	0	0
REACTOME_AXON_GUIDANCE	251	Genes involved in Axon guidance	59	0.2351	0	0
KEGG_AXON_GUIDANCE	129	Axon guidance	32	0.2481	0	0
REACTOME_INTEGRATION_OF_ENERGY_METABOLISM	120	Genes involved in Integration of energy metabolism	31	0.2583	0	0
KEGG_CALCIUM_SIGNALING_PATHWAY	178	Calcium signaling pathway	46	0.2584	0	0
REACTOME_REGULATION_OF_INSULIN_SECRETION	93	Genes involved in Regulation of Insulin Secretion	28	0.3011	0	0
REACTOME_OPIOID_SIGNALLING	78	Genes involved in Opioid Signalling	27	0.3462	0	0
REACTOME_POTASSIUM_CHANNELS	98	Genes involved in Potassium Channels	36	0.3673	0	0
REACTOME_NEURONAL_SYSTEM	279	Genes involved in Neuronal System	110	0.3943	0	0
REACTOME_ION_CHANNEL_TRANSPORT	55	Genes involved in Ion channel transport	22	0.4	0	0
REACTOME_NEUROTRANSMITTER_RECEPTOR_BINDING_AND_DOWNSTREAM_TRANSMISSION_IN_THE_POSTSYNAPTIC_CELL	137	Genes involved in Neurotransmitter Receptor Binding And Downstream Transmission In The Postsynaptic Cell	56	0.4088	0	0
REACTOME_TRANSMISSION_ACROSS_CHEMICAL_SYNAPSES	186	Genes involved in Transmission across Chemical Synapses	81	0.4355	0	0
REACTOME_GABA_RECEPTOR_ACTIVATION	52	Genes involved in GABA receptor activation	27	0.5192	0	0
REACTOME_GPCR_LIGAND_BINDING	408	Genes involved in GPCR ligand binding	52	0.1275	3.33e-16	2.31e-14
KEGG_DILATED_CARDIOMYOPATHY	92	Dilated cardiomyopathy	25	0.2717	4.44e-16	2.79e-14
REACTOME_PHOSPHOLIPASE_C_MEDIATED_CASCADE	54	Genes involved in Phospholipase C-mediated cascade	20	0.3704	4.44e-16	2.79e-14
REACTOME_G_ALPHA_S_SIGNALLING_EVENTS	121	Genes involved in G alpha (s) signalling events	28	0.2314	6.66e-16	4e-14
REACTOME_PLC_BETA_MEDIATED_EVENTS	43	Genes involved in PLC beta mediated events	18	0.4186	8.88e-16	4.88e-14
REACTOME_ACTIVATION_OF_NMDA_RECEPTOR_UPON_GLUTAMATE_BINDING_AND_POSTSYNAPTIC_EVENTS	37	Genes involved in Activation of NMDA receptor upon glutamate binding and postsynaptic events	17	0.4595	8.88e-16	4.88e-14
REACTOME_GABA_B_RECEPTOR_ACTIVATION	38	Genes involved in GABA B receptor activation	17	0.4474	1.44e-15	7.62e-14
KEGG_CARDIAC_MUSCLE_CONTRACTION	80	Cardiac muscle contraction	23	0.2875	1.55e-15	7.89e-14
REACTOME_NEUROTRANSMITTER_RELEASE_CYCLE	34	Genes involved in Neurotransmitter Release Cycle	16	0.4706	3.66e-15	1.79e-13
REACTOME_GPCR_DOWNSTREAM_SIGNALING	805	Genes involved in GPCR downstream signaling	74	0.0919	1.67e-14	7.85e-13
REACTOME_DAG_AND_IP3_SIGNALING	32	Genes involved in DAG and IP3 signaling	15	0.4688	2.9e-14	1.32e-12
REACTOME_POST_NMDA_RECEPTOR_ACTIVATION_EVENTS	33	Genes involved in Post NMDA receptor activation events	15	0.4545	5.14e-14	2.21e-12
KEGG_MELANOGENESIS	102	Melanogenesis	24	0.2353	5.18e-14	2.21e-12
REACTOME_L1CAM_INTERACTIONS	86	Genes involved in L1CAM interactions	22	0.2558	9.08e-14	3.75e-12
KEGG_LONG_TERM_DEPRESSION	70	Long-term depression	20	0.2857	1.22e-13	4.71e-12
KEGG_LONG_TERM_POTENTIATION	70	Long-term potentiation	20	0.2857	1.22e-13	4.71e-12
REACTOME_GABA_A_RECEPTOR_ACTIVATION	12	Genes involved in GABA A receptor activation	10	0.8333	1.25e-13	4.71e-12
REACTOME_G_ALPHA_I_SIGNALLING_EVENTS	195	Genes involved in G alpha (i) signalling events	32	0.1641	1.76e-13	6.45e-12
REACTOME_CA_DEPENDENT_EVENTS	30	Genes involved in Ca-dependent events	14	0.4667	2.28e-13	8.15e-12
KEGG_GAP_JUNCTION	90	Gap junction	22	0.2444	2.5e-13	8.69e-12
REACTOME_SIGNALING_BY_ERBB2	101	Genes involved in Signaling by ERBB2	23	0.2277	3.65e-13	1.24e-11
REACTOME_G_ALPHA_Z_SIGNALLING_EVENTS	44	Genes involved in G alpha (z) signalling events	16	0.3636	5.04e-13	1.64e-11
REACTOME_LIGAND_GATED_ION_CHANNEL_TRANSPORT	21	Genes involved in Ligand-gated ion channel transport	12	0.5714	5.08e-13	1.64e-11
REACTOME_SIGNALLING_BY_NGF	217	Genes involved in Signalling by NGF	33	0.1521	6.72e-13	2.07e-11
KEGG_ARRHYTHMOGENIC_RIGHT_VENTRICULAR_CARDIOMYOPATHY_ARVC	76	Arrhythmogenic right ventricular cardiomyopathy (ARVC)	20	0.2632	6.75e-13	2.07e-11
REACTOME_GABA_SYNTHESIS_RELEASE_REUPTAKE_AND_DEGRADATION	17	Genes involved in GABA synthesis, release, reuptake and degradation	11	0.6471	6.98e-13	2.09e-11
REACTOME_PLATELET_HOMEOSTASIS	78	Genes involved in Platelet homeostasis	20	0.2564	1.15e-12	3.37e-11
REACTOME_DOWNSTREAM_SIGNALING_OF_ACTIVATED_FGFR	100	Genes involved in Downstream signaling of activated FGFR	22	0.22	2.49e-12	7.14e-11
REACTOME_GLUTAMATE_NEUROTRANSMITTER_RELEASE_CYCLE	15	Genes involved in Glutamate Neurotransmitter Release Cycle	10	0.6667	5.17e-12	1.45e-10
KEGG_VASCULAR_SMOOTH_MUSCLE_CONTRACTION	115	Vascular smooth muscle contraction	23	0.2	6.54e-12	1.8e-10
REACTOME_NGF_SIGNALLING_VIA_TRKA_FROM_THE_PLASMA_MEMBRANE	137	Genes involved in NGF signalling via TRKA from the plasma membrane	25	0.1825	6.83e-12	1.83e-10
REACTOME_AQUAPORIN_MEDIATED_TRANSPORT	51	Genes involved in Aquaporin-mediated transport	16	0.3137	6.93e-12	1.83e-10
Gene Symbol	Description	REACTOME_SIGNALING_BY_GPCR	REACTOME_HEMOSTASIS	REACTOME_DEVELOPMENTAL_BIOLOGY	REACTOME_TRANSMEMBRANE_TRANSPORT_OF_SMALL_MOLECULES	KEGG_MAPK_SIGNALING_PATHWAY	KEGG_NEUROACTIVE_LIGAND_RECEPTOR_INTERACTION	REACTOME_AXON_GUIDANCE	KEGG_AXON_GUIDANCE	REACTOME_INTEGRATION_OF_ENERGY_METABOLISM	KEGG_CALCIUM_SIGNALING_PATHWAY	REACTOME_REGULATION_OF_INSULIN_SECRETION	REACTOME_OPIOID_SIGNALLING	REACTOME_POTASSIUM_CHANNELS	REACTOME_NEURONAL_SYSTEM	REACTOME_ION_CHANNEL_TRANSPORT	REACTOME_NEUROTRANSMITTER_RECEPTOR_BINDING_AND_DOWNSTREAM_TRANSMISSION_IN_THE_POSTSYNAPTIC_CELL	REACTOME_TRANSMISSION_ACROSS_CHEMICAL_SYNAPSES	REACTOME_GABA_RECEPTOR_ACTIVATION	REACTOME_GPCR_LIGAND_BINDING	KEGG_DILATED_CARDIOMYOPATHY	REACTOME_PHOSPHOLIPASE_C_MEDIATED_CASCADE	REACTOME_G_ALPHA_S_SIGNALLING_EVENTS	REACTOME_PLC_BETA_MEDIATED_EVENTS	REACTOME_ACTIVATION_OF_NMDA_RECEPTOR_UPON_GLUTAMATE_BINDING_AND_POSTSYNAPTIC_EVENTS	REACTOME_GABA_B_RECEPTOR_ACTIVATION	KEGG_CARDIAC_MUSCLE_CONTRACTION	REACTOME_NEUROTRANSMITTER_RELEASE_CYCLE	REACTOME_GPCR_DOWNSTREAM_SIGNALING	REACTOME_DAG_AND_IP3_SIGNALING	REACTOME_POST_NMDA_RECEPTOR_ACTIVATION_EVENTS	KEGG_MELANOGENESIS	REACTOME_L1CAM_INTERACTIONS	KEGG_LONG_TERM_DEPRESSION	KEGG_LONG_TERM_POTENTIATION	REACTOME_GABA_A_RECEPTOR_ACTIVATION	REACTOME_G_ALPHA_I_SIGNALLING_EVENTS	REACTOME_CA_DEPENDENT_EVENTS	KEGG_GAP_JUNCTION	REACTOME_SIGNALING_BY_ERBB2	REACTOME_G_ALPHA_Z_SIGNALLING_EVENTS	REACTOME_LIGAND_GATED_ION_CHANNEL_TRANSPORT	REACTOME_SIGNALLING_BY_NGF	KEGG_ARRHYTHMOGENIC_RIGHT_VENTRICULAR_CARDIOMYOPATHY_ARVC	REACTOME_GABA_SYNTHESIS_RELEASE_REUPTAKE_AND_DEGRADATION	REACTOME_PLATELET_HOMEOSTASIS	REACTOME_DOWNSTREAM_SIGNALING_OF_ACTIVATED_FGFR	REACTOME_GLUTAMATE_NEUROTRANSMITTER_RELEASE_CYCLE	KEGG_VASCULAR_SMOOTH_MUSCLE_CONTRACTION
HRAS	v-Ha-ras Harvey rat sarcoma viral oncogene homolog	REACTOME_SIGNALING_BY_GPCR	REACTOME_HEMOSTASIS	REACTOME_DEVELOPMENTAL_BIOLOGY		KEGG_MAPK_SIGNALING_PATHWAY		REACTOME_AXON_GUIDANCE	KEGG_AXON_GUIDANCE						REACTOME_NEURONAL_SYSTEM		REACTOME_NEUROTRANSMITTER_RECEPTOR_BINDING_AND_DOWNSTREAM_TRANSMISSION_IN_THE_POSTSYNAPTIC_CELL	REACTOME_TRANSMISSION_ACROSS_CHEMICAL_SYNAPSES							REACTOME_ACTIVATION_OF_NMDA_RECEPTOR_UPON_GLUTAMATE_BINDING_AND_POSTSYNAPTIC_EVENTS						REACTOME_POST_NMDA_RECEPTOR_ACTIVATION_EVENTS	KEGG_MELANOGENESIS		KEGG_LONG_TERM_DEPRESSION	KEGG_LONG_TERM_POTENTIATION				KEGG_GAP_JUNCTION	REACTOME_SIGNALING_BY_ERBB2			REACTOME_SIGNALLING_BY_NGF				REACTOME_DOWNSTREAM_SIGNALING_OF_ACTIVATED_FGFR
PRKAR2B	protein kinase, cAMP-dependent, regulatory, type II, beta	REACTOME_SIGNALING_BY_GPCR	REACTOME_HEMOSTASIS		REACTOME_TRANSMEMBRANE_TRANSPORT_OF_SMALL_MOLECULES					REACTOME_INTEGRATION_OF_ENERGY_METABOLISM		REACTOME_REGULATION_OF_INSULIN_SECRETION	REACTOME_OPIOID_SIGNALLING									REACTOME_PHOSPHOLIPASE_C_MEDIATED_CASCADE		REACTOME_PLC_BETA_MEDIATED_EVENTS						REACTOME_DAG_AND_IP3_SIGNALING								REACTOME_CA_DEPENDENT_EVENTS		REACTOME_SIGNALING_BY_ERBB2			REACTOME_SIGNALLING_BY_NGF				REACTOME_DOWNSTREAM_SIGNALING_OF_ACTIVATED_FGFR
PRKAR1B	protein kinase, cAMP-dependent, regulatory, type I, beta	REACTOME_SIGNALING_BY_GPCR	REACTOME_HEMOSTASIS		REACTOME_TRANSMEMBRANE_TRANSPORT_OF_SMALL_MOLECULES					REACTOME_INTEGRATION_OF_ENERGY_METABOLISM		REACTOME_REGULATION_OF_INSULIN_SECRETION	REACTOME_OPIOID_SIGNALLING									REACTOME_PHOSPHOLIPASE_C_MEDIATED_CASCADE		REACTOME_PLC_BETA_MEDIATED_EVENTS						REACTOME_DAG_AND_IP3_SIGNALING								REACTOME_CA_DEPENDENT_EVENTS		REACTOME_SIGNALING_BY_ERBB2			REACTOME_SIGNALLING_BY_NGF				REACTOME_DOWNSTREAM_SIGNALING_OF_ACTIVATED_FGFR
PRKCG	protein kinase C, gamma	REACTOME_SIGNALING_BY_GPCR	REACTOME_HEMOSTASIS			KEGG_MAPK_SIGNALING_PATHWAY					KEGG_CALCIUM_SIGNALING_PATHWAY		REACTOME_OPIOID_SIGNALLING		REACTOME_NEURONAL_SYSTEM		REACTOME_NEUROTRANSMITTER_RECEPTOR_BINDING_AND_DOWNSTREAM_TRANSMISSION_IN_THE_POSTSYNAPTIC_CELL	REACTOME_TRANSMISSION_ACROSS_CHEMICAL_SYNAPSES				REACTOME_PHOSPHOLIPASE_C_MEDIATED_CASCADE		REACTOME_PLC_BETA_MEDIATED_EVENTS					REACTOME_GPCR_DOWNSTREAM_SIGNALING	REACTOME_DAG_AND_IP3_SIGNALING		KEGG_MELANOGENESIS		KEGG_LONG_TERM_DEPRESSION	KEGG_LONG_TERM_POTENTIATION			REACTOME_CA_DEPENDENT_EVENTS	KEGG_GAP_JUNCTION	REACTOME_SIGNALING_BY_ERBB2	REACTOME_G_ALPHA_Z_SIGNALLING_EVENTS		REACTOME_SIGNALLING_BY_NGF				REACTOME_DOWNSTREAM_SIGNALING_OF_ACTIVATED_FGFR		KEGG_VASCULAR_SMOOTH_MUSCLE_CONTRACTION
CALM1	calmodulin 1 (phosphorylase kinase, delta)	REACTOME_SIGNALING_BY_GPCR	REACTOME_HEMOSTASIS								KEGG_CALCIUM_SIGNALING_PATHWAY		REACTOME_OPIOID_SIGNALLING		REACTOME_NEURONAL_SYSTEM		REACTOME_NEUROTRANSMITTER_RECEPTOR_BINDING_AND_DOWNSTREAM_TRANSMISSION_IN_THE_POSTSYNAPTIC_CELL	REACTOME_TRANSMISSION_ACROSS_CHEMICAL_SYNAPSES				REACTOME_PHOSPHOLIPASE_C_MEDIATED_CASCADE		REACTOME_PLC_BETA_MEDIATED_EVENTS	REACTOME_ACTIVATION_OF_NMDA_RECEPTOR_UPON_GLUTAMATE_BINDING_AND_POSTSYNAPTIC_EVENTS					REACTOME_DAG_AND_IP3_SIGNALING	REACTOME_POST_NMDA_RECEPTOR_ACTIVATION_EVENTS	KEGG_MELANOGENESIS			KEGG_LONG_TERM_POTENTIATION			REACTOME_CA_DEPENDENT_EVENTS		REACTOME_SIGNALING_BY_ERBB2			REACTOME_SIGNALLING_BY_NGF				REACTOME_DOWNSTREAM_SIGNALING_OF_ACTIVATED_FGFR		KEGG_VASCULAR_SMOOTH_MUSCLE_CONTRACTION
CALM3	calmodulin 3 (phosphorylase kinase, delta)	REACTOME_SIGNALING_BY_GPCR	REACTOME_HEMOSTASIS								KEGG_CALCIUM_SIGNALING_PATHWAY		REACTOME_OPIOID_SIGNALLING		REACTOME_NEURONAL_SYSTEM		REACTOME_NEUROTRANSMITTER_RECEPTOR_BINDING_AND_DOWNSTREAM_TRANSMISSION_IN_THE_POSTSYNAPTIC_CELL	REACTOME_TRANSMISSION_ACROSS_CHEMICAL_SYNAPSES				REACTOME_PHOSPHOLIPASE_C_MEDIATED_CASCADE		REACTOME_PLC_BETA_MEDIATED_EVENTS	REACTOME_ACTIVATION_OF_NMDA_RECEPTOR_UPON_GLUTAMATE_BINDING_AND_POSTSYNAPTIC_EVENTS					REACTOME_DAG_AND_IP3_SIGNALING	REACTOME_POST_NMDA_RECEPTOR_ACTIVATION_EVENTS	KEGG_MELANOGENESIS			KEGG_LONG_TERM_POTENTIATION			REACTOME_CA_DEPENDENT_EVENTS		REACTOME_SIGNALING_BY_ERBB2			REACTOME_SIGNALLING_BY_NGF				REACTOME_DOWNSTREAM_SIGNALING_OF_ACTIVATED_FGFR		KEGG_VASCULAR_SMOOTH_MUSCLE_CONTRACTION
PDE1A	phosphodiesterase 1A, calmodulin-dependent	REACTOME_SIGNALING_BY_GPCR	REACTOME_HEMOSTASIS								KEGG_CALCIUM_SIGNALING_PATHWAY		REACTOME_OPIOID_SIGNALLING									REACTOME_PHOSPHOLIPASE_C_MEDIATED_CASCADE	REACTOME_G_ALPHA_S_SIGNALLING_EVENTS	REACTOME_PLC_BETA_MEDIATED_EVENTS					REACTOME_GPCR_DOWNSTREAM_SIGNALING	REACTOME_DAG_AND_IP3_SIGNALING								REACTOME_CA_DEPENDENT_EVENTS		REACTOME_SIGNALING_BY_ERBB2			REACTOME_SIGNALLING_BY_NGF			REACTOME_PLATELET_HOMEOSTASIS	REACTOME_DOWNSTREAM_SIGNALING_OF_ACTIVATED_FGFR
PDE1B	phosphodiesterase 1B, calmodulin-dependent	REACTOME_SIGNALING_BY_GPCR	REACTOME_HEMOSTASIS								KEGG_CALCIUM_SIGNALING_PATHWAY		REACTOME_OPIOID_SIGNALLING									REACTOME_PHOSPHOLIPASE_C_MEDIATED_CASCADE	REACTOME_G_ALPHA_S_SIGNALLING_EVENTS	REACTOME_PLC_BETA_MEDIATED_EVENTS					REACTOME_GPCR_DOWNSTREAM_SIGNALING	REACTOME_DAG_AND_IP3_SIGNALING								REACTOME_CA_DEPENDENT_EVENTS		REACTOME_SIGNALING_BY_ERBB2			REACTOME_SIGNALLING_BY_NGF			REACTOME_PLATELET_HOMEOSTASIS	REACTOME_DOWNSTREAM_SIGNALING_OF_ACTIVATED_FGFR
PRKCE	protein kinase C, epsilon	REACTOME_SIGNALING_BY_GPCR	REACTOME_HEMOSTASIS																			REACTOME_PHOSPHOLIPASE_C_MEDIATED_CASCADE							REACTOME_GPCR_DOWNSTREAM_SIGNALING	REACTOME_DAG_AND_IP3_SIGNALING										REACTOME_SIGNALING_BY_ERBB2	REACTOME_G_ALPHA_Z_SIGNALLING_EVENTS		REACTOME_SIGNALLING_BY_NGF				REACTOME_DOWNSTREAM_SIGNALING_OF_ACTIVATED_FGFR		KEGG_VASCULAR_SMOOTH_MUSCLE_CONTRACTION
ADCY8	adenylate cyclase 8 (brain)	REACTOME_SIGNALING_BY_GPCR			REACTOME_TRANSMEMBRANE_TRANSPORT_OF_SMALL_MOLECULES					REACTOME_INTEGRATION_OF_ENERGY_METABOLISM	KEGG_CALCIUM_SIGNALING_PATHWAY	REACTOME_REGULATION_OF_INSULIN_SECRETION	REACTOME_OPIOID_SIGNALLING		REACTOME_NEURONAL_SYSTEM		REACTOME_NEUROTRANSMITTER_RECEPTOR_BINDING_AND_DOWNSTREAM_TRANSMISSION_IN_THE_POSTSYNAPTIC_CELL	REACTOME_TRANSMISSION_ACROSS_CHEMICAL_SYNAPSES	REACTOME_GABA_RECEPTOR_ACTIVATION		KEGG_DILATED_CARDIOMYOPATHY	REACTOME_PHOSPHOLIPASE_C_MEDIATED_CASCADE	REACTOME_G_ALPHA_S_SIGNALLING_EVENTS	REACTOME_PLC_BETA_MEDIATED_EVENTS	REACTOME_ACTIVATION_OF_NMDA_RECEPTOR_UPON_GLUTAMATE_BINDING_AND_POSTSYNAPTIC_EVENTS	REACTOME_GABA_B_RECEPTOR_ACTIVATION			REACTOME_GPCR_DOWNSTREAM_SIGNALING	REACTOME_DAG_AND_IP3_SIGNALING	REACTOME_POST_NMDA_RECEPTOR_ACTIVATION_EVENTS	KEGG_MELANOGENESIS			KEGG_LONG_TERM_POTENTIATION		REACTOME_G_ALPHA_I_SIGNALLING_EVENTS	REACTOME_CA_DEPENDENT_EVENTS	KEGG_GAP_JUNCTION	REACTOME_SIGNALING_BY_ERBB2	REACTOME_G_ALPHA_Z_SIGNALLING_EVENTS		REACTOME_SIGNALLING_BY_NGF				REACTOME_DOWNSTREAM_SIGNALING_OF_ACTIVATED_FGFR		KEGG_VASCULAR_SMOOTH_MUSCLE_CONTRACTION
ADCY1	adenylate cyclase 1 (brain)	REACTOME_SIGNALING_BY_GPCR			REACTOME_TRANSMEMBRANE_TRANSPORT_OF_SMALL_MOLECULES					REACTOME_INTEGRATION_OF_ENERGY_METABOLISM	KEGG_CALCIUM_SIGNALING_PATHWAY		REACTOME_OPIOID_SIGNALLING		REACTOME_NEURONAL_SYSTEM		REACTOME_NEUROTRANSMITTER_RECEPTOR_BINDING_AND_DOWNSTREAM_TRANSMISSION_IN_THE_POSTSYNAPTIC_CELL	REACTOME_TRANSMISSION_ACROSS_CHEMICAL_SYNAPSES	REACTOME_GABA_RECEPTOR_ACTIVATION		KEGG_DILATED_CARDIOMYOPATHY	REACTOME_PHOSPHOLIPASE_C_MEDIATED_CASCADE	REACTOME_G_ALPHA_S_SIGNALLING_EVENTS	REACTOME_PLC_BETA_MEDIATED_EVENTS	REACTOME_ACTIVATION_OF_NMDA_RECEPTOR_UPON_GLUTAMATE_BINDING_AND_POSTSYNAPTIC_EVENTS	REACTOME_GABA_B_RECEPTOR_ACTIVATION			REACTOME_GPCR_DOWNSTREAM_SIGNALING	REACTOME_DAG_AND_IP3_SIGNALING	REACTOME_POST_NMDA_RECEPTOR_ACTIVATION_EVENTS	KEGG_MELANOGENESIS			KEGG_LONG_TERM_POTENTIATION		REACTOME_G_ALPHA_I_SIGNALLING_EVENTS	REACTOME_CA_DEPENDENT_EVENTS	KEGG_GAP_JUNCTION	REACTOME_SIGNALING_BY_ERBB2	REACTOME_G_ALPHA_Z_SIGNALLING_EVENTS		REACTOME_SIGNALLING_BY_NGF				REACTOME_DOWNSTREAM_SIGNALING_OF_ACTIVATED_FGFR		KEGG_VASCULAR_SMOOTH_MUSCLE_CONTRACTION
ADCY3	adenylate cyclase 3	REACTOME_SIGNALING_BY_GPCR			REACTOME_TRANSMEMBRANE_TRANSPORT_OF_SMALL_MOLECULES					REACTOME_INTEGRATION_OF_ENERGY_METABOLISM	KEGG_CALCIUM_SIGNALING_PATHWAY		REACTOME_OPIOID_SIGNALLING		REACTOME_NEURONAL_SYSTEM		REACTOME_NEUROTRANSMITTER_RECEPTOR_BINDING_AND_DOWNSTREAM_TRANSMISSION_IN_THE_POSTSYNAPTIC_CELL	REACTOME_TRANSMISSION_ACROSS_CHEMICAL_SYNAPSES	REACTOME_GABA_RECEPTOR_ACTIVATION		KEGG_DILATED_CARDIOMYOPATHY	REACTOME_PHOSPHOLIPASE_C_MEDIATED_CASCADE	REACTOME_G_ALPHA_S_SIGNALLING_EVENTS	REACTOME_PLC_BETA_MEDIATED_EVENTS	REACTOME_ACTIVATION_OF_NMDA_RECEPTOR_UPON_GLUTAMATE_BINDING_AND_POSTSYNAPTIC_EVENTS	REACTOME_GABA_B_RECEPTOR_ACTIVATION			REACTOME_GPCR_DOWNSTREAM_SIGNALING	REACTOME_DAG_AND_IP3_SIGNALING	REACTOME_POST_NMDA_RECEPTOR_ACTIVATION_EVENTS	KEGG_MELANOGENESIS					REACTOME_G_ALPHA_I_SIGNALLING_EVENTS	REACTOME_CA_DEPENDENT_EVENTS	KEGG_GAP_JUNCTION	REACTOME_SIGNALING_BY_ERBB2	REACTOME_G_ALPHA_Z_SIGNALLING_EVENTS		REACTOME_SIGNALLING_BY_NGF				REACTOME_DOWNSTREAM_SIGNALING_OF_ACTIVATED_FGFR		KEGG_VASCULAR_SMOOTH_MUSCLE_CONTRACTION
ADCY2	adenylate cyclase 2 (brain)	REACTOME_SIGNALING_BY_GPCR			REACTOME_TRANSMEMBRANE_TRANSPORT_OF_SMALL_MOLECULES					REACTOME_INTEGRATION_OF_ENERGY_METABOLISM	KEGG_CALCIUM_SIGNALING_PATHWAY		REACTOME_OPIOID_SIGNALLING		REACTOME_NEURONAL_SYSTEM		REACTOME_NEUROTRANSMITTER_RECEPTOR_BINDING_AND_DOWNSTREAM_TRANSMISSION_IN_THE_POSTSYNAPTIC_CELL	REACTOME_TRANSMISSION_ACROSS_CHEMICAL_SYNAPSES	REACTOME_GABA_RECEPTOR_ACTIVATION		KEGG_DILATED_CARDIOMYOPATHY	REACTOME_PHOSPHOLIPASE_C_MEDIATED_CASCADE	REACTOME_G_ALPHA_S_SIGNALLING_EVENTS	REACTOME_PLC_BETA_MEDIATED_EVENTS		REACTOME_GABA_B_RECEPTOR_ACTIVATION			REACTOME_GPCR_DOWNSTREAM_SIGNALING	REACTOME_DAG_AND_IP3_SIGNALING		KEGG_MELANOGENESIS					REACTOME_G_ALPHA_I_SIGNALLING_EVENTS	REACTOME_CA_DEPENDENT_EVENTS	KEGG_GAP_JUNCTION	REACTOME_SIGNALING_BY_ERBB2	REACTOME_G_ALPHA_Z_SIGNALLING_EVENTS		REACTOME_SIGNALLING_BY_NGF				REACTOME_DOWNSTREAM_SIGNALING_OF_ACTIVATED_FGFR		KEGG_VASCULAR_SMOOTH_MUSCLE_CONTRACTION
ADCY6	adenylate cyclase 6	REACTOME_SIGNALING_BY_GPCR			REACTOME_TRANSMEMBRANE_TRANSPORT_OF_SMALL_MOLECULES					REACTOME_INTEGRATION_OF_ENERGY_METABOLISM		REACTOME_REGULATION_OF_INSULIN_SECRETION	REACTOME_OPIOID_SIGNALLING		REACTOME_NEURONAL_SYSTEM		REACTOME_NEUROTRANSMITTER_RECEPTOR_BINDING_AND_DOWNSTREAM_TRANSMISSION_IN_THE_POSTSYNAPTIC_CELL	REACTOME_TRANSMISSION_ACROSS_CHEMICAL_SYNAPSES	REACTOME_GABA_RECEPTOR_ACTIVATION		KEGG_DILATED_CARDIOMYOPATHY	REACTOME_PHOSPHOLIPASE_C_MEDIATED_CASCADE	REACTOME_G_ALPHA_S_SIGNALLING_EVENTS	REACTOME_PLC_BETA_MEDIATED_EVENTS		REACTOME_GABA_B_RECEPTOR_ACTIVATION			REACTOME_GPCR_DOWNSTREAM_SIGNALING	REACTOME_DAG_AND_IP3_SIGNALING		KEGG_MELANOGENESIS					REACTOME_G_ALPHA_I_SIGNALLING_EVENTS	REACTOME_CA_DEPENDENT_EVENTS	KEGG_GAP_JUNCTION	REACTOME_SIGNALING_BY_ERBB2	REACTOME_G_ALPHA_Z_SIGNALLING_EVENTS		REACTOME_SIGNALLING_BY_NGF				REACTOME_DOWNSTREAM_SIGNALING_OF_ACTIVATED_FGFR		KEGG_VASCULAR_SMOOTH_MUSCLE_CONTRACTION
ADCY5	adenylate cyclase 5	REACTOME_SIGNALING_BY_GPCR			REACTOME_TRANSMEMBRANE_TRANSPORT_OF_SMALL_MOLECULES					REACTOME_INTEGRATION_OF_ENERGY_METABOLISM		REACTOME_REGULATION_OF_INSULIN_SECRETION	REACTOME_OPIOID_SIGNALLING		REACTOME_NEURONAL_SYSTEM		REACTOME_NEUROTRANSMITTER_RECEPTOR_BINDING_AND_DOWNSTREAM_TRANSMISSION_IN_THE_POSTSYNAPTIC_CELL	REACTOME_TRANSMISSION_ACROSS_CHEMICAL_SYNAPSES	REACTOME_GABA_RECEPTOR_ACTIVATION		KEGG_DILATED_CARDIOMYOPATHY	REACTOME_PHOSPHOLIPASE_C_MEDIATED_CASCADE	REACTOME_G_ALPHA_S_SIGNALLING_EVENTS	REACTOME_PLC_BETA_MEDIATED_EVENTS		REACTOME_GABA_B_RECEPTOR_ACTIVATION			REACTOME_GPCR_DOWNSTREAM_SIGNALING	REACTOME_DAG_AND_IP3_SIGNALING		KEGG_MELANOGENESIS					REACTOME_G_ALPHA_I_SIGNALLING_EVENTS	REACTOME_CA_DEPENDENT_EVENTS	KEGG_GAP_JUNCTION	REACTOME_SIGNALING_BY_ERBB2	REACTOME_G_ALPHA_Z_SIGNALLING_EVENTS		REACTOME_SIGNALLING_BY_NGF				REACTOME_DOWNSTREAM_SIGNALING_OF_ACTIVATED_FGFR		KEGG_VASCULAR_SMOOTH_MUSCLE_CONTRACTION
CAMK4	calcium/calmodulin-dependent protein kinase IV	REACTOME_SIGNALING_BY_GPCR									KEGG_CALCIUM_SIGNALING_PATHWAY		REACTOME_OPIOID_SIGNALLING		REACTOME_NEURONAL_SYSTEM		REACTOME_NEUROTRANSMITTER_RECEPTOR_BINDING_AND_DOWNSTREAM_TRANSMISSION_IN_THE_POSTSYNAPTIC_CELL	REACTOME_TRANSMISSION_ACROSS_CHEMICAL_SYNAPSES				REACTOME_PHOSPHOLIPASE_C_MEDIATED_CASCADE		REACTOME_PLC_BETA_MEDIATED_EVENTS	REACTOME_ACTIVATION_OF_NMDA_RECEPTOR_UPON_GLUTAMATE_BINDING_AND_POSTSYNAPTIC_EVENTS					REACTOME_DAG_AND_IP3_SIGNALING	REACTOME_POST_NMDA_RECEPTOR_ACTIVATION_EVENTS				KEGG_LONG_TERM_POTENTIATION			REACTOME_CA_DEPENDENT_EVENTS		REACTOME_SIGNALING_BY_ERBB2			REACTOME_SIGNALLING_BY_NGF				REACTOME_DOWNSTREAM_SIGNALING_OF_ACTIVATED_FGFR
FGFR2	fibroblast growth factor receptor 2 (bacteria-expressed kinase, keratinocyte growth factor receptor, craniofacial dysostosis 1, Crouzon syndrome, Pfeiffer syndrome, Jackson-Weiss syndrome)					KEGG_MAPK_SIGNALING_PATHWAY																REACTOME_PHOSPHOLIPASE_C_MEDIATED_CASCADE																									REACTOME_DOWNSTREAM_SIGNALING_OF_ACTIVATED_FGFR
FGFR3	fibroblast growth factor receptor 3 (achondroplasia, thanatophoric dwarfism)					KEGG_MAPK_SIGNALING_PATHWAY																REACTOME_PHOSPHOLIPASE_C_MEDIATED_CASCADE																									REACTOME_DOWNSTREAM_SIGNALING_OF_ACTIVATED_FGFR
FGF9	fibroblast growth factor 9 (glia-activating factor)					KEGG_MAPK_SIGNALING_PATHWAY																REACTOME_PHOSPHOLIPASE_C_MEDIATED_CASCADE																									REACTOME_DOWNSTREAM_SIGNALING_OF_ACTIVATED_FGFR
FGF22	fibroblast growth factor 22					KEGG_MAPK_SIGNALING_PATHWAY																REACTOME_PHOSPHOLIPASE_C_MEDIATED_CASCADE																									REACTOME_DOWNSTREAM_SIGNALING_OF_ACTIVATED_FGFR
FGFR4	fibroblast growth factor receptor 4					KEGG_MAPK_SIGNALING_PATHWAY																REACTOME_PHOSPHOLIPASE_C_MEDIATED_CASCADE																									REACTOME_DOWNSTREAM_SIGNALING_OF_ACTIVATED_FGFR
NR4A1	nuclear receptor subfamily 4, group A, member 1					KEGG_MAPK_SIGNALING_PATHWAY																																		REACTOME_SIGNALING_BY_ERBB2			REACTOME_SIGNALLING_BY_NGF				REACTOME_DOWNSTREAM_SIGNALING_OF_ACTIVATED_FGFR
TRPC3	transient receptor potential cation channel, subfamily C, member 3	REACTOME_SIGNALING_BY_GPCR	REACTOME_HEMOSTASIS	REACTOME_DEVELOPMENTAL_BIOLOGY				REACTOME_AXON_GUIDANCE																					REACTOME_GPCR_DOWNSTREAM_SIGNALING																	REACTOME_PLATELET_HOMEOSTASIS
RHOB	ras homolog gene family, member B	REACTOME_SIGNALING_BY_GPCR	REACTOME_HEMOSTASIS	REACTOME_DEVELOPMENTAL_BIOLOGY				REACTOME_AXON_GUIDANCE																					REACTOME_GPCR_DOWNSTREAM_SIGNALING
GNG2	guanine nucleotide binding protein (G protein), gamma 2	REACTOME_SIGNALING_BY_GPCR	REACTOME_HEMOSTASIS		REACTOME_TRANSMEMBRANE_TRANSPORT_OF_SMALL_MOLECULES					REACTOME_INTEGRATION_OF_ENERGY_METABOLISM		REACTOME_REGULATION_OF_INSULIN_SECRETION	REACTOME_OPIOID_SIGNALLING	REACTOME_POTASSIUM_CHANNELS	REACTOME_NEURONAL_SYSTEM		REACTOME_NEUROTRANSMITTER_RECEPTOR_BINDING_AND_DOWNSTREAM_TRANSMISSION_IN_THE_POSTSYNAPTIC_CELL	REACTOME_TRANSMISSION_ACROSS_CHEMICAL_SYNAPSES	REACTOME_GABA_RECEPTOR_ACTIVATION	REACTOME_GPCR_LIGAND_BINDING			REACTOME_G_ALPHA_S_SIGNALLING_EVENTS			REACTOME_GABA_B_RECEPTOR_ACTIVATION			REACTOME_GPCR_DOWNSTREAM_SIGNALING								REACTOME_G_ALPHA_I_SIGNALLING_EVENTS				REACTOME_G_ALPHA_Z_SIGNALLING_EVENTS					REACTOME_PLATELET_HOMEOSTASIS
GNG4	guanine nucleotide binding protein (G protein), gamma 4	REACTOME_SIGNALING_BY_GPCR	REACTOME_HEMOSTASIS		REACTOME_TRANSMEMBRANE_TRANSPORT_OF_SMALL_MOLECULES					REACTOME_INTEGRATION_OF_ENERGY_METABOLISM		REACTOME_REGULATION_OF_INSULIN_SECRETION	REACTOME_OPIOID_SIGNALLING	REACTOME_POTASSIUM_CHANNELS	REACTOME_NEURONAL_SYSTEM		REACTOME_NEUROTRANSMITTER_RECEPTOR_BINDING_AND_DOWNSTREAM_TRANSMISSION_IN_THE_POSTSYNAPTIC_CELL	REACTOME_TRANSMISSION_ACROSS_CHEMICAL_SYNAPSES	REACTOME_GABA_RECEPTOR_ACTIVATION	REACTOME_GPCR_LIGAND_BINDING			REACTOME_G_ALPHA_S_SIGNALLING_EVENTS			REACTOME_GABA_B_RECEPTOR_ACTIVATION			REACTOME_GPCR_DOWNSTREAM_SIGNALING								REACTOME_G_ALPHA_I_SIGNALLING_EVENTS				REACTOME_G_ALPHA_Z_SIGNALLING_EVENTS					REACTOME_PLATELET_HOMEOSTASIS
GNG7	guanine nucleotide binding protein (G protein), gamma 7	REACTOME_SIGNALING_BY_GPCR	REACTOME_HEMOSTASIS		REACTOME_TRANSMEMBRANE_TRANSPORT_OF_SMALL_MOLECULES					REACTOME_INTEGRATION_OF_ENERGY_METABOLISM		REACTOME_REGULATION_OF_INSULIN_SECRETION	REACTOME_OPIOID_SIGNALLING	REACTOME_POTASSIUM_CHANNELS	REACTOME_NEURONAL_SYSTEM		REACTOME_NEUROTRANSMITTER_RECEPTOR_BINDING_AND_DOWNSTREAM_TRANSMISSION_IN_THE_POSTSYNAPTIC_CELL	REACTOME_TRANSMISSION_ACROSS_CHEMICAL_SYNAPSES	REACTOME_GABA_RECEPTOR_ACTIVATION	REACTOME_GPCR_LIGAND_BINDING			REACTOME_G_ALPHA_S_SIGNALLING_EVENTS			REACTOME_GABA_B_RECEPTOR_ACTIVATION			REACTOME_GPCR_DOWNSTREAM_SIGNALING								REACTOME_G_ALPHA_I_SIGNALLING_EVENTS				REACTOME_G_ALPHA_Z_SIGNALLING_EVENTS					REACTOME_PLATELET_HOMEOSTASIS
GNG8	guanine nucleotide binding protein (G protein), gamma 8	REACTOME_SIGNALING_BY_GPCR	REACTOME_HEMOSTASIS		REACTOME_TRANSMEMBRANE_TRANSPORT_OF_SMALL_MOLECULES					REACTOME_INTEGRATION_OF_ENERGY_METABOLISM		REACTOME_REGULATION_OF_INSULIN_SECRETION	REACTOME_OPIOID_SIGNALLING	REACTOME_POTASSIUM_CHANNELS	REACTOME_NEURONAL_SYSTEM		REACTOME_NEUROTRANSMITTER_RECEPTOR_BINDING_AND_DOWNSTREAM_TRANSMISSION_IN_THE_POSTSYNAPTIC_CELL	REACTOME_TRANSMISSION_ACROSS_CHEMICAL_SYNAPSES	REACTOME_GABA_RECEPTOR_ACTIVATION	REACTOME_GPCR_LIGAND_BINDING			REACTOME_G_ALPHA_S_SIGNALLING_EVENTS			REACTOME_GABA_B_RECEPTOR_ACTIVATION			REACTOME_GPCR_DOWNSTREAM_SIGNALING								REACTOME_G_ALPHA_I_SIGNALLING_EVENTS				REACTOME_G_ALPHA_Z_SIGNALLING_EVENTS					REACTOME_PLATELET_HOMEOSTASIS
RASGRP2	RAS guanyl releasing protein 2 (calcium and DAG-regulated)	REACTOME_SIGNALING_BY_GPCR	REACTOME_HEMOSTASIS			KEGG_MAPK_SIGNALING_PATHWAY																							REACTOME_GPCR_DOWNSTREAM_SIGNALING
ADRA2A	adrenergic, alpha-2A-, receptor	REACTOME_SIGNALING_BY_GPCR	REACTOME_HEMOSTASIS				KEGG_NEUROACTIVE_LIGAND_RECEPTOR_INTERACTION			REACTOME_INTEGRATION_OF_ENERGY_METABOLISM		REACTOME_REGULATION_OF_INSULIN_SECRETION								REACTOME_GPCR_LIGAND_BINDING									REACTOME_GPCR_DOWNSTREAM_SIGNALING								REACTOME_G_ALPHA_I_SIGNALLING_EVENTS				REACTOME_G_ALPHA_Z_SIGNALLING_EVENTS
GNAI1	guanine nucleotide binding protein (G protein), alpha inhibiting activity polypeptide 1	REACTOME_SIGNALING_BY_GPCR	REACTOME_HEMOSTASIS						KEGG_AXON_GUIDANCE	REACTOME_INTEGRATION_OF_ENERGY_METABOLISM		REACTOME_REGULATION_OF_INSULIN_SECRETION	REACTOME_OPIOID_SIGNALLING		REACTOME_NEURONAL_SYSTEM		REACTOME_NEUROTRANSMITTER_RECEPTOR_BINDING_AND_DOWNSTREAM_TRANSMISSION_IN_THE_POSTSYNAPTIC_CELL	REACTOME_TRANSMISSION_ACROSS_CHEMICAL_SYNAPSES	REACTOME_GABA_RECEPTOR_ACTIVATION				REACTOME_G_ALPHA_S_SIGNALLING_EVENTS	REACTOME_PLC_BETA_MEDIATED_EVENTS		REACTOME_GABA_B_RECEPTOR_ACTIVATION			REACTOME_GPCR_DOWNSTREAM_SIGNALING			KEGG_MELANOGENESIS		KEGG_LONG_TERM_DEPRESSION			REACTOME_G_ALPHA_I_SIGNALLING_EVENTS		KEGG_GAP_JUNCTION		REACTOME_G_ALPHA_Z_SIGNALLING_EVENTS
PDE2A	phosphodiesterase 2A, cGMP-stimulated	REACTOME_SIGNALING_BY_GPCR	REACTOME_HEMOSTASIS																				REACTOME_G_ALPHA_S_SIGNALLING_EVENTS						REACTOME_GPCR_DOWNSTREAM_SIGNALING																	REACTOME_PLATELET_HOMEOSTASIS
PDE10A	phosphodiesterase 10A	REACTOME_SIGNALING_BY_GPCR	REACTOME_HEMOSTASIS																				REACTOME_G_ALPHA_S_SIGNALLING_EVENTS						REACTOME_GPCR_DOWNSTREAM_SIGNALING																	REACTOME_PLATELET_HOMEOSTASIS
PIK3R2	phosphoinositide-3-kinase, regulatory subunit 2 (p85 beta)	REACTOME_SIGNALING_BY_GPCR	REACTOME_HEMOSTASIS																										REACTOME_GPCR_DOWNSTREAM_SIGNALING														REACTOME_SIGNALLING_BY_NGF
DGKE	diacylglycerol kinase, epsilon 64kDa	REACTOME_SIGNALING_BY_GPCR	REACTOME_HEMOSTASIS																										REACTOME_GPCR_DOWNSTREAM_SIGNALING
MGLL	monoglyceride lipase	REACTOME_SIGNALING_BY_GPCR	REACTOME_HEMOSTASIS																										REACTOME_GPCR_DOWNSTREAM_SIGNALING
WNT10B	wingless-type MMTV integration site family, member 10B	REACTOME_SIGNALING_BY_GPCR		REACTOME_DEVELOPMENTAL_BIOLOGY																REACTOME_GPCR_LIGAND_BINDING												KEGG_MELANOGENESIS
ARHGEF9	Cdc42 guanine nucleotide exchange factor (GEF) 9	REACTOME_SIGNALING_BY_GPCR			REACTOME_TRANSMEMBRANE_TRANSPORT_OF_SMALL_MOLECULES										REACTOME_NEURONAL_SYSTEM	REACTOME_ION_CHANNEL_TRANSPORT	REACTOME_NEUROTRANSMITTER_RECEPTOR_BINDING_AND_DOWNSTREAM_TRANSMISSION_IN_THE_POSTSYNAPTIC_CELL	REACTOME_TRANSMISSION_ACROSS_CHEMICAL_SYNAPSES	REACTOME_GABA_RECEPTOR_ACTIVATION										REACTOME_GPCR_DOWNSTREAM_SIGNALING							REACTOME_GABA_A_RECEPTOR_ACTIVATION						REACTOME_LIGAND_GATED_ION_CHANNEL_TRANSPORT	REACTOME_SIGNALLING_BY_NGF
PPP3CA	protein phosphatase 3 (formerly 2B), catalytic subunit, alpha isoform (calcineurin A alpha)	REACTOME_SIGNALING_BY_GPCR				KEGG_MAPK_SIGNALING_PATHWAY			KEGG_AXON_GUIDANCE		KEGG_CALCIUM_SIGNALING_PATHWAY		REACTOME_OPIOID_SIGNALLING																						KEGG_LONG_TERM_POTENTIATION
RASGRF1	Ras protein-specific guanine nucleotide-releasing factor 1	REACTOME_SIGNALING_BY_GPCR				KEGG_MAPK_SIGNALING_PATHWAY									REACTOME_NEURONAL_SYSTEM		REACTOME_NEUROTRANSMITTER_RECEPTOR_BINDING_AND_DOWNSTREAM_TRANSMISSION_IN_THE_POSTSYNAPTIC_CELL	REACTOME_TRANSMISSION_ACROSS_CHEMICAL_SYNAPSES							REACTOME_ACTIVATION_OF_NMDA_RECEPTOR_UPON_GLUTAMATE_BINDING_AND_POSTSYNAPTIC_EVENTS				REACTOME_GPCR_DOWNSTREAM_SIGNALING		REACTOME_POST_NMDA_RECEPTOR_ACTIVATION_EVENTS												REACTOME_SIGNALLING_BY_NGF
CHRM3	cholinergic receptor, muscarinic 3	REACTOME_SIGNALING_BY_GPCR					KEGG_NEUROACTIVE_LIGAND_RECEPTOR_INTERACTION			REACTOME_INTEGRATION_OF_ENERGY_METABOLISM	KEGG_CALCIUM_SIGNALING_PATHWAY	REACTOME_REGULATION_OF_INSULIN_SECRETION								REACTOME_GPCR_LIGAND_BINDING									REACTOME_GPCR_DOWNSTREAM_SIGNALING
HRH2	histamine receptor H2	REACTOME_SIGNALING_BY_GPCR					KEGG_NEUROACTIVE_LIGAND_RECEPTOR_INTERACTION				KEGG_CALCIUM_SIGNALING_PATHWAY									REACTOME_GPCR_LIGAND_BINDING			REACTOME_G_ALPHA_S_SIGNALLING_EVENTS						REACTOME_GPCR_DOWNSTREAM_SIGNALING
CHRM2	cholinergic receptor, muscarinic 2	REACTOME_SIGNALING_BY_GPCR					KEGG_NEUROACTIVE_LIGAND_RECEPTOR_INTERACTION				KEGG_CALCIUM_SIGNALING_PATHWAY									REACTOME_GPCR_LIGAND_BINDING									REACTOME_GPCR_DOWNSTREAM_SIGNALING								REACTOME_G_ALPHA_I_SIGNALLING_EVENTS
HTR2A	5-hydroxytryptamine (serotonin) receptor 2A	REACTOME_SIGNALING_BY_GPCR					KEGG_NEUROACTIVE_LIGAND_RECEPTOR_INTERACTION				KEGG_CALCIUM_SIGNALING_PATHWAY									REACTOME_GPCR_LIGAND_BINDING									REACTOME_GPCR_DOWNSTREAM_SIGNALING										KEGG_GAP_JUNCTION
ADRA1B	adrenergic, alpha-1B-, receptor	REACTOME_SIGNALING_BY_GPCR					KEGG_NEUROACTIVE_LIGAND_RECEPTOR_INTERACTION				KEGG_CALCIUM_SIGNALING_PATHWAY									REACTOME_GPCR_LIGAND_BINDING									REACTOME_GPCR_DOWNSTREAM_SIGNALING																				KEGG_VASCULAR_SMOOTH_MUSCLE_CONTRACTION
CHRM1	cholinergic receptor, muscarinic 1	REACTOME_SIGNALING_BY_GPCR					KEGG_NEUROACTIVE_LIGAND_RECEPTOR_INTERACTION				KEGG_CALCIUM_SIGNALING_PATHWAY									REACTOME_GPCR_LIGAND_BINDING									REACTOME_GPCR_DOWNSTREAM_SIGNALING
NTSR1	neurotensin receptor 1 (high affinity)	REACTOME_SIGNALING_BY_GPCR					KEGG_NEUROACTIVE_LIGAND_RECEPTOR_INTERACTION				KEGG_CALCIUM_SIGNALING_PATHWAY									REACTOME_GPCR_LIGAND_BINDING									REACTOME_GPCR_DOWNSTREAM_SIGNALING
GRM1	glutamate receptor, metabotropic 1	REACTOME_SIGNALING_BY_GPCR					KEGG_NEUROACTIVE_LIGAND_RECEPTOR_INTERACTION				KEGG_CALCIUM_SIGNALING_PATHWAY									REACTOME_GPCR_LIGAND_BINDING														KEGG_LONG_TERM_DEPRESSION	KEGG_LONG_TERM_POTENTIATION				KEGG_GAP_JUNCTION
GABBR2	gamma-aminobutyric acid (GABA) B receptor, 2	REACTOME_SIGNALING_BY_GPCR					KEGG_NEUROACTIVE_LIGAND_RECEPTOR_INTERACTION							REACTOME_POTASSIUM_CHANNELS	REACTOME_NEURONAL_SYSTEM		REACTOME_NEUROTRANSMITTER_RECEPTOR_BINDING_AND_DOWNSTREAM_TRANSMISSION_IN_THE_POSTSYNAPTIC_CELL	REACTOME_TRANSMISSION_ACROSS_CHEMICAL_SYNAPSES	REACTOME_GABA_RECEPTOR_ACTIVATION	REACTOME_GPCR_LIGAND_BINDING						REACTOME_GABA_B_RECEPTOR_ACTIVATION			REACTOME_GPCR_DOWNSTREAM_SIGNALING								REACTOME_G_ALPHA_I_SIGNALLING_EVENTS
MC1R	melanocortin 1 receptor (alpha melanocyte stimulating hormone receptor)	REACTOME_SIGNALING_BY_GPCR					KEGG_NEUROACTIVE_LIGAND_RECEPTOR_INTERACTION													REACTOME_GPCR_LIGAND_BINDING			REACTOME_G_ALPHA_S_SIGNALLING_EVENTS						REACTOME_GPCR_DOWNSTREAM_SIGNALING			KEGG_MELANOGENESIS
ADCYAP1R1	adenylate cyclase activating polypeptide 1 (pituitary) receptor type I	REACTOME_SIGNALING_BY_GPCR					KEGG_NEUROACTIVE_LIGAND_RECEPTOR_INTERACTION													REACTOME_GPCR_LIGAND_BINDING			REACTOME_G_ALPHA_S_SIGNALLING_EVENTS						REACTOME_GPCR_DOWNSTREAM_SIGNALING														REACTOME_SIGNALLING_BY_NGF
RXFP1	relaxin/insulin-like family peptide receptor 1	REACTOME_SIGNALING_BY_GPCR					KEGG_NEUROACTIVE_LIGAND_RECEPTOR_INTERACTION													REACTOME_GPCR_LIGAND_BINDING			REACTOME_G_ALPHA_S_SIGNALLING_EVENTS						REACTOME_GPCR_DOWNSTREAM_SIGNALING
VIPR2	vasoactive intestinal peptide receptor 2	REACTOME_SIGNALING_BY_GPCR					KEGG_NEUROACTIVE_LIGAND_RECEPTOR_INTERACTION													REACTOME_GPCR_LIGAND_BINDING			REACTOME_G_ALPHA_S_SIGNALLING_EVENTS						REACTOME_GPCR_DOWNSTREAM_SIGNALING
VIPR1	vasoactive intestinal peptide receptor 1	REACTOME_SIGNALING_BY_GPCR					KEGG_NEUROACTIVE_LIGAND_RECEPTOR_INTERACTION													REACTOME_GPCR_LIGAND_BINDING			REACTOME_G_ALPHA_S_SIGNALLING_EVENTS						REACTOME_GPCR_DOWNSTREAM_SIGNALING
GLP2R	glucagon-like peptide 2 receptor	REACTOME_SIGNALING_BY_GPCR					KEGG_NEUROACTIVE_LIGAND_RECEPTOR_INTERACTION													REACTOME_GPCR_LIGAND_BINDING			REACTOME_G_ALPHA_S_SIGNALLING_EVENTS						REACTOME_GPCR_DOWNSTREAM_SIGNALING
DRD2	dopamine receptor D2	REACTOME_SIGNALING_BY_GPCR					KEGG_NEUROACTIVE_LIGAND_RECEPTOR_INTERACTION													REACTOME_GPCR_LIGAND_BINDING									REACTOME_GPCR_DOWNSTREAM_SIGNALING								REACTOME_G_ALPHA_I_SIGNALLING_EVENTS		KEGG_GAP_JUNCTION
MCHR1	melanin-concentrating hormone receptor 1	REACTOME_SIGNALING_BY_GPCR					KEGG_NEUROACTIVE_LIGAND_RECEPTOR_INTERACTION													REACTOME_GPCR_LIGAND_BINDING									REACTOME_GPCR_DOWNSTREAM_SIGNALING								REACTOME_G_ALPHA_I_SIGNALLING_EVENTS
HRH3	histamine receptor H3	REACTOME_SIGNALING_BY_GPCR					KEGG_NEUROACTIVE_LIGAND_RECEPTOR_INTERACTION													REACTOME_GPCR_LIGAND_BINDING									REACTOME_GPCR_DOWNSTREAM_SIGNALING								REACTOME_G_ALPHA_I_SIGNALLING_EVENTS
NPY1R	neuropeptide Y receptor Y1	REACTOME_SIGNALING_BY_GPCR					KEGG_NEUROACTIVE_LIGAND_RECEPTOR_INTERACTION													REACTOME_GPCR_LIGAND_BINDING									REACTOME_GPCR_DOWNSTREAM_SIGNALING								REACTOME_G_ALPHA_I_SIGNALLING_EVENTS
OPRL1	opiate receptor-like 1	REACTOME_SIGNALING_BY_GPCR					KEGG_NEUROACTIVE_LIGAND_RECEPTOR_INTERACTION													REACTOME_GPCR_LIGAND_BINDING									REACTOME_GPCR_DOWNSTREAM_SIGNALING								REACTOME_G_ALPHA_I_SIGNALLING_EVENTS
SSTR1	somatostatin receptor 1	REACTOME_SIGNALING_BY_GPCR					KEGG_NEUROACTIVE_LIGAND_RECEPTOR_INTERACTION													REACTOME_GPCR_LIGAND_BINDING									REACTOME_GPCR_DOWNSTREAM_SIGNALING								REACTOME_G_ALPHA_I_SIGNALLING_EVENTS
SSTR2	somatostatin receptor 2	REACTOME_SIGNALING_BY_GPCR					KEGG_NEUROACTIVE_LIGAND_RECEPTOR_INTERACTION													REACTOME_GPCR_LIGAND_BINDING									REACTOME_GPCR_DOWNSTREAM_SIGNALING								REACTOME_G_ALPHA_I_SIGNALLING_EVENTS
CNR1	cannabinoid receptor 1 (brain)	REACTOME_SIGNALING_BY_GPCR					KEGG_NEUROACTIVE_LIGAND_RECEPTOR_INTERACTION													REACTOME_GPCR_LIGAND_BINDING									REACTOME_GPCR_DOWNSTREAM_SIGNALING								REACTOME_G_ALPHA_I_SIGNALLING_EVENTS
ADORA1	adenosine A1 receptor	REACTOME_SIGNALING_BY_GPCR					KEGG_NEUROACTIVE_LIGAND_RECEPTOR_INTERACTION													REACTOME_GPCR_LIGAND_BINDING									REACTOME_GPCR_DOWNSTREAM_SIGNALING								REACTOME_G_ALPHA_I_SIGNALLING_EVENTS
GRM4	glutamate receptor, metabotropic 4	REACTOME_SIGNALING_BY_GPCR					KEGG_NEUROACTIVE_LIGAND_RECEPTOR_INTERACTION													REACTOME_GPCR_LIGAND_BINDING
GRM2	glutamate receptor, metabotropic 2	REACTOME_SIGNALING_BY_GPCR					KEGG_NEUROACTIVE_LIGAND_RECEPTOR_INTERACTION													REACTOME_GPCR_LIGAND_BINDING
GRM3	glutamate receptor, metabotropic 3	REACTOME_SIGNALING_BY_GPCR					KEGG_NEUROACTIVE_LIGAND_RECEPTOR_INTERACTION													REACTOME_GPCR_LIGAND_BINDING
GRM7	glutamate receptor, metabotropic 7	REACTOME_SIGNALING_BY_GPCR					KEGG_NEUROACTIVE_LIGAND_RECEPTOR_INTERACTION													REACTOME_GPCR_LIGAND_BINDING
PLCB1	phospholipase C, beta 1 (phosphoinositide-specific)	REACTOME_SIGNALING_BY_GPCR								REACTOME_INTEGRATION_OF_ENERGY_METABOLISM	KEGG_CALCIUM_SIGNALING_PATHWAY	REACTOME_REGULATION_OF_INSULIN_SECRETION	REACTOME_OPIOID_SIGNALLING		REACTOME_NEURONAL_SYSTEM		REACTOME_NEUROTRANSMITTER_RECEPTOR_BINDING_AND_DOWNSTREAM_TRANSMISSION_IN_THE_POSTSYNAPTIC_CELL	REACTOME_TRANSMISSION_ACROSS_CHEMICAL_SYNAPSES						REACTOME_PLC_BETA_MEDIATED_EVENTS					REACTOME_GPCR_DOWNSTREAM_SIGNALING			KEGG_MELANOGENESIS		KEGG_LONG_TERM_DEPRESSION	KEGG_LONG_TERM_POTENTIATION				KEGG_GAP_JUNCTION										KEGG_VASCULAR_SMOOTH_MUSCLE_CONTRACTION
GNAO1	guanine nucleotide binding protein (G protein), alpha activating activity polypeptide O	REACTOME_SIGNALING_BY_GPCR								REACTOME_INTEGRATION_OF_ENERGY_METABOLISM		REACTOME_REGULATION_OF_INSULIN_SECRETION	REACTOME_OPIOID_SIGNALLING											REACTOME_PLC_BETA_MEDIATED_EVENTS								KEGG_MELANOGENESIS		KEGG_LONG_TERM_DEPRESSION
GNAL	guanine nucleotide binding protein (G protein), alpha activating activity polypeptide, olfactory type	REACTOME_SIGNALING_BY_GPCR									KEGG_CALCIUM_SIGNALING_PATHWAY		REACTOME_OPIOID_SIGNALLING		REACTOME_NEURONAL_SYSTEM		REACTOME_NEUROTRANSMITTER_RECEPTOR_BINDING_AND_DOWNSTREAM_TRANSMISSION_IN_THE_POSTSYNAPTIC_CELL	REACTOME_TRANSMISSION_ACROSS_CHEMICAL_SYNAPSES	REACTOME_GABA_RECEPTOR_ACTIVATION							REACTOME_GABA_B_RECEPTOR_ACTIVATION			REACTOME_GPCR_DOWNSTREAM_SIGNALING
GNAZ	guanine nucleotide binding protein (G protein), alpha z polypeptide	REACTOME_SIGNALING_BY_GPCR											REACTOME_OPIOID_SIGNALLING										REACTOME_G_ALPHA_S_SIGNALLING_EVENTS	REACTOME_PLC_BETA_MEDIATED_EVENTS					REACTOME_GPCR_DOWNSTREAM_SIGNALING					KEGG_LONG_TERM_DEPRESSION			REACTOME_G_ALPHA_I_SIGNALLING_EVENTS				REACTOME_G_ALPHA_Z_SIGNALLING_EVENTS
PDE4B	phosphodiesterase 4B, cAMP-specific (phosphodiesterase E4 dunce homolog, Drosophila)	REACTOME_SIGNALING_BY_GPCR											REACTOME_OPIOID_SIGNALLING										REACTOME_G_ALPHA_S_SIGNALLING_EVENTS						REACTOME_GPCR_DOWNSTREAM_SIGNALING
PDE4C	phosphodiesterase 4C, cAMP-specific (phosphodiesterase E1 dunce homolog, Drosophila)	REACTOME_SIGNALING_BY_GPCR											REACTOME_OPIOID_SIGNALLING										REACTOME_G_ALPHA_S_SIGNALLING_EVENTS						REACTOME_GPCR_DOWNSTREAM_SIGNALING
PPP1R1B	protein phosphatase 1, regulatory (inhibitor) subunit 1B (dopamine and cAMP regulated phosphoprotein, DARPP-32)	REACTOME_SIGNALING_BY_GPCR											REACTOME_OPIOID_SIGNALLING
CRH	corticotropin releasing hormone	REACTOME_SIGNALING_BY_GPCR																		REACTOME_GPCR_LIGAND_BINDING			REACTOME_G_ALPHA_S_SIGNALLING_EVENTS						REACTOME_GPCR_DOWNSTREAM_SIGNALING					KEGG_LONG_TERM_DEPRESSION
RAMP2	receptor (calcitonin) activity modifying protein 2	REACTOME_SIGNALING_BY_GPCR																		REACTOME_GPCR_LIGAND_BINDING			REACTOME_G_ALPHA_S_SIGNALLING_EVENTS						REACTOME_GPCR_DOWNSTREAM_SIGNALING																				KEGG_VASCULAR_SMOOTH_MUSCLE_CONTRACTION
SCT	secretin	REACTOME_SIGNALING_BY_GPCR																		REACTOME_GPCR_LIGAND_BINDING			REACTOME_G_ALPHA_S_SIGNALLING_EVENTS						REACTOME_GPCR_DOWNSTREAM_SIGNALING
AGT	angiotensinogen (serpin peptidase inhibitor, clade A, member 8)	REACTOME_SIGNALING_BY_GPCR																		REACTOME_GPCR_LIGAND_BINDING									REACTOME_GPCR_DOWNSTREAM_SIGNALING								REACTOME_G_ALPHA_I_SIGNALLING_EVENTS
SAA1	serum amyloid A1	REACTOME_SIGNALING_BY_GPCR																		REACTOME_GPCR_LIGAND_BINDING									REACTOME_GPCR_DOWNSTREAM_SIGNALING								REACTOME_G_ALPHA_I_SIGNALLING_EVENTS
NPY	neuropeptide Y	REACTOME_SIGNALING_BY_GPCR																		REACTOME_GPCR_LIGAND_BINDING									REACTOME_GPCR_DOWNSTREAM_SIGNALING								REACTOME_G_ALPHA_I_SIGNALLING_EVENTS
PENK	proenkephalin	REACTOME_SIGNALING_BY_GPCR																		REACTOME_GPCR_LIGAND_BINDING									REACTOME_GPCR_DOWNSTREAM_SIGNALING								REACTOME_G_ALPHA_I_SIGNALLING_EVENTS
INSL5	insulin-like 5	REACTOME_SIGNALING_BY_GPCR																		REACTOME_GPCR_LIGAND_BINDING									REACTOME_GPCR_DOWNSTREAM_SIGNALING								REACTOME_G_ALPHA_I_SIGNALLING_EVENTS
RGR	retinal G protein coupled receptor	REACTOME_SIGNALING_BY_GPCR																		REACTOME_GPCR_LIGAND_BINDING									REACTOME_GPCR_DOWNSTREAM_SIGNALING								REACTOME_G_ALPHA_I_SIGNALLING_EVENTS
EDN3	endothelin 3	REACTOME_SIGNALING_BY_GPCR																		REACTOME_GPCR_LIGAND_BINDING									REACTOME_GPCR_DOWNSTREAM_SIGNALING
KISS1	KiSS-1 metastasis-suppressor	REACTOME_SIGNALING_BY_GPCR																		REACTOME_GPCR_LIGAND_BINDING									REACTOME_GPCR_DOWNSTREAM_SIGNALING
TRH	thyrotropin-releasing hormone	REACTOME_SIGNALING_BY_GPCR																		REACTOME_GPCR_LIGAND_BINDING									REACTOME_GPCR_DOWNSTREAM_SIGNALING
GPR68	G protein-coupled receptor 68	REACTOME_SIGNALING_BY_GPCR																		REACTOME_GPCR_LIGAND_BINDING									REACTOME_GPCR_DOWNSTREAM_SIGNALING
WNT2B	wingless-type MMTV integration site family, member 2B	REACTOME_SIGNALING_BY_GPCR																		REACTOME_GPCR_LIGAND_BINDING												KEGG_MELANOGENESIS
WNT9A	wingless-type MMTV integration site family, member 9A	REACTOME_SIGNALING_BY_GPCR																		REACTOME_GPCR_LIGAND_BINDING												KEGG_MELANOGENESIS
FZD8	frizzled homolog 8 (Drosophila)	REACTOME_SIGNALING_BY_GPCR																		REACTOME_GPCR_LIGAND_BINDING												KEGG_MELANOGENESIS
CCBP2	chemokine binding protein 2	REACTOME_SIGNALING_BY_GPCR																		REACTOME_GPCR_LIGAND_BINDING
DARC	Duffy blood group, chemokine receptor	REACTOME_SIGNALING_BY_GPCR																		REACTOME_GPCR_LIGAND_BINDING
RGS4	regulator of G-protein signalling 4	REACTOME_SIGNALING_BY_GPCR																											REACTOME_GPCR_DOWNSTREAM_SIGNALING								REACTOME_G_ALPHA_I_SIGNALLING_EVENTS				REACTOME_G_ALPHA_Z_SIGNALLING_EVENTS
RGS7	regulator of G-protein signalling 7	REACTOME_SIGNALING_BY_GPCR																											REACTOME_GPCR_DOWNSTREAM_SIGNALING								REACTOME_G_ALPHA_I_SIGNALLING_EVENTS
ARHGEF4	Rho guanine nucleotide exchange factor (GEF) 4	REACTOME_SIGNALING_BY_GPCR																											REACTOME_GPCR_DOWNSTREAM_SIGNALING														REACTOME_SIGNALLING_BY_NGF
KALRN	kalirin, RhoGEF kinase	REACTOME_SIGNALING_BY_GPCR																											REACTOME_GPCR_DOWNSTREAM_SIGNALING														REACTOME_SIGNALLING_BY_NGF
ARHGEF2	rho/rac guanine nucleotide exchange factor (GEF) 2	REACTOME_SIGNALING_BY_GPCR																											REACTOME_GPCR_DOWNSTREAM_SIGNALING														REACTOME_SIGNALLING_BY_NGF
MCF2	MCF.2 cell line derived transforming sequence	REACTOME_SIGNALING_BY_GPCR																											REACTOME_GPCR_DOWNSTREAM_SIGNALING														REACTOME_SIGNALLING_BY_NGF
ABR	active BCR-related gene	REACTOME_SIGNALING_BY_GPCR																											REACTOME_GPCR_DOWNSTREAM_SIGNALING														REACTOME_SIGNALLING_BY_NGF
HBEGF	heparin-binding EGF-like growth factor	REACTOME_SIGNALING_BY_GPCR																																						REACTOME_SIGNALING_BY_ERBB2
FYN	FYN oncogene related to SRC, FGR, YES		REACTOME_HEMOSTASIS	REACTOME_DEVELOPMENTAL_BIOLOGY				REACTOME_AXON_GUIDANCE	KEGG_AXON_GUIDANCE																															REACTOME_SIGNALING_BY_ERBB2
ATP2B2	ATPase, Ca++ transporting, plasma membrane 2		REACTOME_HEMOSTASIS		REACTOME_TRANSMEMBRANE_TRANSPORT_OF_SMALL_MOLECULES						KEGG_CALCIUM_SIGNALING_PATHWAY					REACTOME_ION_CHANNEL_TRANSPORT																														REACTOME_PLATELET_HOMEOSTASIS
ATP2B3	ATPase, Ca++ transporting, plasma membrane 3		REACTOME_HEMOSTASIS		REACTOME_TRANSMEMBRANE_TRANSPORT_OF_SMALL_MOLECULES						KEGG_CALCIUM_SIGNALING_PATHWAY					REACTOME_ION_CHANNEL_TRANSPORT																														REACTOME_PLATELET_HOMEOSTASIS
SLC8A1	solute carrier family 8 (sodium/calcium exchanger), member 1		REACTOME_HEMOSTASIS		REACTOME_TRANSMEMBRANE_TRANSPORT_OF_SMALL_MOLECULES						KEGG_CALCIUM_SIGNALING_PATHWAY										KEGG_DILATED_CARDIOMYOPATHY						KEGG_CARDIAC_MUSCLE_CONTRACTION																	KEGG_ARRHYTHMOGENIC_RIGHT_VENTRICULAR_CARDIOMYOPATHY_ARVC		REACTOME_PLATELET_HOMEOSTASIS
SLC8A2	solute carrier family 8 (sodium-calcium exchanger), member 2		REACTOME_HEMOSTASIS		REACTOME_TRANSMEMBRANE_TRANSPORT_OF_SMALL_MOLECULES						KEGG_CALCIUM_SIGNALING_PATHWAY																																			REACTOME_PLATELET_HOMEOSTASIS
ATP1B1	ATPase, Na+/K+ transporting, beta 1 polypeptide		REACTOME_HEMOSTASIS		REACTOME_TRANSMEMBRANE_TRANSPORT_OF_SMALL_MOLECULES											REACTOME_ION_CHANNEL_TRANSPORT											KEGG_CARDIAC_MUSCLE_CONTRACTION
ATP1B2	ATPase, Na+/K+ transporting, beta 2 polypeptide		REACTOME_HEMOSTASIS		REACTOME_TRANSMEMBRANE_TRANSPORT_OF_SMALL_MOLECULES											REACTOME_ION_CHANNEL_TRANSPORT											KEGG_CARDIAC_MUSCLE_CONTRACTION
SLC7A5	solute carrier family 7 (cationic amino acid transporter, y+ system), member 5		REACTOME_HEMOSTASIS		REACTOME_TRANSMEMBRANE_TRANSPORT_OF_SMALL_MOLECULES
TF	transferrin		REACTOME_HEMOSTASIS		REACTOME_TRANSMEMBRANE_TRANSPORT_OF_SMALL_MOLECULES
RAPGEF4	Rap guanine nucleotide exchange factor (GEF) 4		REACTOME_HEMOSTASIS							REACTOME_INTEGRATION_OF_ENERGY_METABOLISM		REACTOME_REGULATION_OF_INSULIN_SECRETION
KCNMB2	potassium large conductance calcium-activated channel, subfamily M, beta member 2		REACTOME_HEMOSTASIS											REACTOME_POTASSIUM_CHANNELS	REACTOME_NEURONAL_SYSTEM																															REACTOME_PLATELET_HOMEOSTASIS			KEGG_VASCULAR_SMOOTH_MUSCLE_CONTRACTION
KCNMB4	potassium large conductance calcium-activated channel, subfamily M, beta member 4		REACTOME_HEMOSTASIS											REACTOME_POTASSIUM_CHANNELS	REACTOME_NEURONAL_SYSTEM																															REACTOME_PLATELET_HOMEOSTASIS			KEGG_VASCULAR_SMOOTH_MUSCLE_CONTRACTION
ACTN2	actinin, alpha 2		REACTOME_HEMOSTASIS												REACTOME_NEURONAL_SYSTEM		REACTOME_NEUROTRANSMITTER_RECEPTOR_BINDING_AND_DOWNSTREAM_TRANSMISSION_IN_THE_POSTSYNAPTIC_CELL	REACTOME_TRANSMISSION_ACROSS_CHEMICAL_SYNAPSES							REACTOME_ACTIVATION_OF_NMDA_RECEPTOR_UPON_GLUTAMATE_BINDING_AND_POSTSYNAPTIC_EVENTS						REACTOME_POST_NMDA_RECEPTOR_ACTIVATION_EVENTS													KEGG_ARRHYTHMOGENIC_RIGHT_VENTRICULAR_CARDIOMYOPATHY_ARVC
ITGA3	integrin, alpha 3 (antigen CD49C, alpha 3 subunit of VLA-3 receptor)		REACTOME_HEMOSTASIS																		KEGG_DILATED_CARDIOMYOPATHY																							KEGG_ARRHYTHMOGENIC_RIGHT_VENTRICULAR_CARDIOMYOPATHY_ARVC
GUCY1A2	guanylate cyclase 1, soluble, alpha 2		REACTOME_HEMOSTASIS																															KEGG_LONG_TERM_DEPRESSION					KEGG_GAP_JUNCTION							REACTOME_PLATELET_HOMEOSTASIS			KEGG_VASCULAR_SMOOTH_MUSCLE_CONTRACTION
GUCY1A3	guanylate cyclase 1, soluble, alpha 3		REACTOME_HEMOSTASIS																															KEGG_LONG_TERM_DEPRESSION					KEGG_GAP_JUNCTION							REACTOME_PLATELET_HOMEOSTASIS			KEGG_VASCULAR_SMOOTH_MUSCLE_CONTRACTION
GUCY1B3	guanylate cyclase 1, soluble, beta 3		REACTOME_HEMOSTASIS																															KEGG_LONG_TERM_DEPRESSION					KEGG_GAP_JUNCTION							REACTOME_PLATELET_HOMEOSTASIS			KEGG_VASCULAR_SMOOTH_MUSCLE_CONTRACTION
PRKG2	protein kinase, cGMP-dependent, type II		REACTOME_HEMOSTASIS																															KEGG_LONG_TERM_DEPRESSION					KEGG_GAP_JUNCTION							REACTOME_PLATELET_HOMEOSTASIS
MAG	myelin associated glycoprotein		REACTOME_HEMOSTASIS																																								REACTOME_SIGNALLING_BY_NGF
PPP2R5B	protein phosphatase 2, regulatory subunit B (B56), beta isoform		REACTOME_HEMOSTASIS																																											REACTOME_PLATELET_HOMEOSTASIS
PRKCZ	protein kinase C, zeta		REACTOME_HEMOSTASIS
F11R	F11 receptor		REACTOME_HEMOSTASIS
SIRPA	signal-regulatory protein alpha		REACTOME_HEMOSTASIS
GP1BB	glycoprotein Ib (platelet), beta polypeptide		REACTOME_HEMOSTASIS
SERPINE1	serpin peptidase inhibitor, clade E (nexin, plasminogen activator inhibitor type 1), member 1		REACTOME_HEMOSTASIS
CLU	clusterin		REACTOME_HEMOSTASIS
SCG3	secretogranin III		REACTOME_HEMOSTASIS
ITPK1	inositol 1,3,4-triphosphate 5/6 kinase		REACTOME_HEMOSTASIS
DOCK4	dedicator of cytokinesis 4		REACTOME_HEMOSTASIS
KIF26A	kinesin family member 26A		REACTOME_HEMOSTASIS
KIF3B	kinesin family member 3B		REACTOME_HEMOSTASIS
KIF3C	kinesin family member 3C		REACTOME_HEMOSTASIS
KIF5A	kinesin family member 5A		REACTOME_HEMOSTASIS
KIFAP3	kinesin-associated protein 3		REACTOME_HEMOSTASIS
KLC2	kinesin light chain 2		REACTOME_HEMOSTASIS
GRB14	growth factor receptor-bound protein 14		REACTOME_HEMOSTASIS
CABLES2	Cdk5 and Abl enzyme substrate 2		REACTOME_HEMOSTASIS
DOCK3	dedicator of cytokinesis 3		REACTOME_HEMOSTASIS
F3	coagulation factor III (thromboplastin, tissue factor)		REACTOME_HEMOSTASIS
GCK	glucokinase (hexokinase 4, maturity onset diabetes of the young 2)			REACTOME_DEVELOPMENTAL_BIOLOGY	REACTOME_TRANSMEMBRANE_TRANSPORT_OF_SMALL_MOLECULES
PAK1	p21/Cdc42/Rac1-activated kinase 1 (STE20 homolog, yeast)			REACTOME_DEVELOPMENTAL_BIOLOGY		KEGG_MAPK_SIGNALING_PATHWAY		REACTOME_AXON_GUIDANCE	KEGG_AXON_GUIDANCE																								REACTOME_L1CAM_INTERACTIONS
CACNB2	calcium channel, voltage-dependent, beta 2 subunit			REACTOME_DEVELOPMENTAL_BIOLOGY		KEGG_MAPK_SIGNALING_PATHWAY		REACTOME_AXON_GUIDANCE		REACTOME_INTEGRATION_OF_ENERGY_METABOLISM		REACTOME_REGULATION_OF_INSULIN_SECRETION			REACTOME_NEURONAL_SYSTEM			REACTOME_TRANSMISSION_ACROSS_CHEMICAL_SYNAPSES			KEGG_DILATED_CARDIOMYOPATHY						KEGG_CARDIAC_MUSCLE_CONTRACTION																	KEGG_ARRHYTHMOGENIC_RIGHT_VENTRICULAR_CARDIOMYOPATHY_ARVC
CACNB3	calcium channel, voltage-dependent, beta 3 subunit			REACTOME_DEVELOPMENTAL_BIOLOGY		KEGG_MAPK_SIGNALING_PATHWAY		REACTOME_AXON_GUIDANCE		REACTOME_INTEGRATION_OF_ENERGY_METABOLISM		REACTOME_REGULATION_OF_INSULIN_SECRETION			REACTOME_NEURONAL_SYSTEM			REACTOME_TRANSMISSION_ACROSS_CHEMICAL_SYNAPSES			KEGG_DILATED_CARDIOMYOPATHY						KEGG_CARDIAC_MUSCLE_CONTRACTION																	KEGG_ARRHYTHMOGENIC_RIGHT_VENTRICULAR_CARDIOMYOPATHY_ARVC
CACNA1G	calcium channel, voltage-dependent, alpha 1G subunit			REACTOME_DEVELOPMENTAL_BIOLOGY		KEGG_MAPK_SIGNALING_PATHWAY		REACTOME_AXON_GUIDANCE			KEGG_CALCIUM_SIGNALING_PATHWAY
CACNA1H	calcium channel, voltage-dependent, alpha 1H subunit			REACTOME_DEVELOPMENTAL_BIOLOGY		KEGG_MAPK_SIGNALING_PATHWAY		REACTOME_AXON_GUIDANCE			KEGG_CALCIUM_SIGNALING_PATHWAY
CACNA1I	calcium channel, voltage-dependent, alpha 1I subunit			REACTOME_DEVELOPMENTAL_BIOLOGY		KEGG_MAPK_SIGNALING_PATHWAY		REACTOME_AXON_GUIDANCE			KEGG_CALCIUM_SIGNALING_PATHWAY
CACNB1	calcium channel, voltage-dependent, beta 1 subunit			REACTOME_DEVELOPMENTAL_BIOLOGY		KEGG_MAPK_SIGNALING_PATHWAY		REACTOME_AXON_GUIDANCE							REACTOME_NEURONAL_SYSTEM			REACTOME_TRANSMISSION_ACROSS_CHEMICAL_SYNAPSES			KEGG_DILATED_CARDIOMYOPATHY						KEGG_CARDIAC_MUSCLE_CONTRACTION																	KEGG_ARRHYTHMOGENIC_RIGHT_VENTRICULAR_CARDIOMYOPATHY_ARVC
CACNB4	calcium channel, voltage-dependent, beta 4 subunit			REACTOME_DEVELOPMENTAL_BIOLOGY		KEGG_MAPK_SIGNALING_PATHWAY		REACTOME_AXON_GUIDANCE							REACTOME_NEURONAL_SYSTEM			REACTOME_TRANSMISSION_ACROSS_CHEMICAL_SYNAPSES			KEGG_DILATED_CARDIOMYOPATHY						KEGG_CARDIAC_MUSCLE_CONTRACTION																	KEGG_ARRHYTHMOGENIC_RIGHT_VENTRICULAR_CARDIOMYOPATHY_ARVC
MEF2C	MADS box transcription enhancer factor 2, polypeptide C (myocyte enhancer factor 2C)			REACTOME_DEVELOPMENTAL_BIOLOGY		KEGG_MAPK_SIGNALING_PATHWAY																																					REACTOME_SIGNALLING_BY_NGF
DPYSL2	dihydropyrimidinase-like 2			REACTOME_DEVELOPMENTAL_BIOLOGY				REACTOME_AXON_GUIDANCE	KEGG_AXON_GUIDANCE																								REACTOME_L1CAM_INTERACTIONS
PAK6	p21(CDKN1A)-activated kinase 6			REACTOME_DEVELOPMENTAL_BIOLOGY				REACTOME_AXON_GUIDANCE	KEGG_AXON_GUIDANCE
PAK7	p21(CDKN1A)-activated kinase 7			REACTOME_DEVELOPMENTAL_BIOLOGY				REACTOME_AXON_GUIDANCE	KEGG_AXON_GUIDANCE
DCC	deleted in colorectal carcinoma			REACTOME_DEVELOPMENTAL_BIOLOGY				REACTOME_AXON_GUIDANCE	KEGG_AXON_GUIDANCE
MET	met proto-oncogene (hepatocyte growth factor receptor)			REACTOME_DEVELOPMENTAL_BIOLOGY				REACTOME_AXON_GUIDANCE	KEGG_AXON_GUIDANCE
SRGAP2	SLIT-ROBO Rho GTPase activating protein 2			REACTOME_DEVELOPMENTAL_BIOLOGY				REACTOME_AXON_GUIDANCE	KEGG_AXON_GUIDANCE
PLXNA1	plexin A1			REACTOME_DEVELOPMENTAL_BIOLOGY				REACTOME_AXON_GUIDANCE	KEGG_AXON_GUIDANCE
PLXNA3	plexin A3			REACTOME_DEVELOPMENTAL_BIOLOGY				REACTOME_AXON_GUIDANCE	KEGG_AXON_GUIDANCE
RND1	Rho family GTPase 1			REACTOME_DEVELOPMENTAL_BIOLOGY				REACTOME_AXON_GUIDANCE	KEGG_AXON_GUIDANCE
SEMA6D	sema domain, transmembrane domain (TM), and cytoplasmic domain, (semaphorin) 6D			REACTOME_DEVELOPMENTAL_BIOLOGY				REACTOME_AXON_GUIDANCE	KEGG_AXON_GUIDANCE
SEMA7A	semaphorin 7A, GPI membrane anchor (John Milton Hagen blood group)			REACTOME_DEVELOPMENTAL_BIOLOGY				REACTOME_AXON_GUIDANCE	KEGG_AXON_GUIDANCE
UNC5A	unc-5 homolog A (C. elegans)			REACTOME_DEVELOPMENTAL_BIOLOGY				REACTOME_AXON_GUIDANCE	KEGG_AXON_GUIDANCE
SLIT1	slit homolog 1 (Drosophila)			REACTOME_DEVELOPMENTAL_BIOLOGY				REACTOME_AXON_GUIDANCE	KEGG_AXON_GUIDANCE
ABLIM3	actin binding LIM protein family, member 3			REACTOME_DEVELOPMENTAL_BIOLOGY				REACTOME_AXON_GUIDANCE	KEGG_AXON_GUIDANCE
UNC5D	unc-5 homolog D (C. elegans)			REACTOME_DEVELOPMENTAL_BIOLOGY				REACTOME_AXON_GUIDANCE	KEGG_AXON_GUIDANCE
ROBO2	roundabout, axon guidance receptor, homolog 2 (Drosophila)			REACTOME_DEVELOPMENTAL_BIOLOGY				REACTOME_AXON_GUIDANCE	KEGG_AXON_GUIDANCE
KCNQ2	potassium voltage-gated channel, KQT-like subfamily, member 2			REACTOME_DEVELOPMENTAL_BIOLOGY				REACTOME_AXON_GUIDANCE						REACTOME_POTASSIUM_CHANNELS	REACTOME_NEURONAL_SYSTEM																		REACTOME_L1CAM_INTERACTIONS
KCNQ3	potassium voltage-gated channel, KQT-like subfamily, member 3			REACTOME_DEVELOPMENTAL_BIOLOGY				REACTOME_AXON_GUIDANCE						REACTOME_POTASSIUM_CHANNELS	REACTOME_NEURONAL_SYSTEM																		REACTOME_L1CAM_INTERACTIONS
SH3GL2	SH3-domain GRB2-like 2			REACTOME_DEVELOPMENTAL_BIOLOGY				REACTOME_AXON_GUIDANCE																									REACTOME_L1CAM_INTERACTIONS										REACTOME_SIGNALLING_BY_NGF
DNM1	dynamin 1			REACTOME_DEVELOPMENTAL_BIOLOGY				REACTOME_AXON_GUIDANCE																									REACTOME_L1CAM_INTERACTIONS										REACTOME_SIGNALLING_BY_NGF
SPTBN2	spectrin, beta, non-erythrocytic 2			REACTOME_DEVELOPMENTAL_BIOLOGY				REACTOME_AXON_GUIDANCE																									REACTOME_L1CAM_INTERACTIONS
SPTB	spectrin, beta, erythrocytic (includes spherocytosis, clinical type I)			REACTOME_DEVELOPMENTAL_BIOLOGY				REACTOME_AXON_GUIDANCE																									REACTOME_L1CAM_INTERACTIONS
SPTBN4	spectrin, beta, non-erythrocytic 4			REACTOME_DEVELOPMENTAL_BIOLOGY				REACTOME_AXON_GUIDANCE																									REACTOME_L1CAM_INTERACTIONS
NRCAM	neuronal cell adhesion molecule			REACTOME_DEVELOPMENTAL_BIOLOGY				REACTOME_AXON_GUIDANCE																									REACTOME_L1CAM_INTERACTIONS
SCN3B	sodium channel, voltage-gated, type III, beta			REACTOME_DEVELOPMENTAL_BIOLOGY				REACTOME_AXON_GUIDANCE																									REACTOME_L1CAM_INTERACTIONS
ANK1	ankyrin 1, erythrocytic			REACTOME_DEVELOPMENTAL_BIOLOGY				REACTOME_AXON_GUIDANCE																									REACTOME_L1CAM_INTERACTIONS
SCN1B	sodium channel, voltage-gated, type I, beta			REACTOME_DEVELOPMENTAL_BIOLOGY				REACTOME_AXON_GUIDANCE																									REACTOME_L1CAM_INTERACTIONS
SCN2B	sodium channel, voltage-gated, type II, beta			REACTOME_DEVELOPMENTAL_BIOLOGY				REACTOME_AXON_GUIDANCE																									REACTOME_L1CAM_INTERACTIONS
SCN8A	sodium channel, voltage gated, type VIII, alpha			REACTOME_DEVELOPMENTAL_BIOLOGY				REACTOME_AXON_GUIDANCE																									REACTOME_L1CAM_INTERACTIONS
NCAM1	neural cell adhesion molecule 1			REACTOME_DEVELOPMENTAL_BIOLOGY				REACTOME_AXON_GUIDANCE																									REACTOME_L1CAM_INTERACTIONS
LAMA1	laminin, alpha 1			REACTOME_DEVELOPMENTAL_BIOLOGY				REACTOME_AXON_GUIDANCE																									REACTOME_L1CAM_INTERACTIONS
CNTN1	contactin 1			REACTOME_DEVELOPMENTAL_BIOLOGY				REACTOME_AXON_GUIDANCE																									REACTOME_L1CAM_INTERACTIONS
CNTNAP1	contactin associated protein 1			REACTOME_DEVELOPMENTAL_BIOLOGY				REACTOME_AXON_GUIDANCE																									REACTOME_L1CAM_INTERACTIONS
KIAA1598	KIAA1598			REACTOME_DEVELOPMENTAL_BIOLOGY				REACTOME_AXON_GUIDANCE																									REACTOME_L1CAM_INTERACTIONS
CNTN6	contactin 6			REACTOME_DEVELOPMENTAL_BIOLOGY				REACTOME_AXON_GUIDANCE																									REACTOME_L1CAM_INTERACTIONS
DCX	doublecortex; lissencephaly, X-linked (doublecortin)			REACTOME_DEVELOPMENTAL_BIOLOGY				REACTOME_AXON_GUIDANCE																									REACTOME_L1CAM_INTERACTIONS
PIP5K1C	phosphatidylinositol-4-phosphate 5-kinase, type I, gamma			REACTOME_DEVELOPMENTAL_BIOLOGY				REACTOME_AXON_GUIDANCE
COL9A3	collagen, type IX, alpha 3			REACTOME_DEVELOPMENTAL_BIOLOGY				REACTOME_AXON_GUIDANCE
ST8SIA2	ST8 alpha-N-acetyl-neuraminide alpha-2,8-sialyltransferase 2			REACTOME_DEVELOPMENTAL_BIOLOGY				REACTOME_AXON_GUIDANCE
GFRA2	GDNF family receptor alpha 2			REACTOME_DEVELOPMENTAL_BIOLOGY				REACTOME_AXON_GUIDANCE
CDK5R1	cyclin-dependent kinase 5, regulatory subunit 1 (p35)			REACTOME_DEVELOPMENTAL_BIOLOGY				REACTOME_AXON_GUIDANCE
CRMP1	collapsin response mediator protein 1			REACTOME_DEVELOPMENTAL_BIOLOGY				REACTOME_AXON_GUIDANCE
DPYSL4	dihydropyrimidinase-like 4			REACTOME_DEVELOPMENTAL_BIOLOGY				REACTOME_AXON_GUIDANCE
PITPNA	phosphatidylinositol transfer protein, alpha			REACTOME_DEVELOPMENTAL_BIOLOGY				REACTOME_AXON_GUIDANCE
SIAH2	seven in absentia homolog 2 (Drosophila)			REACTOME_DEVELOPMENTAL_BIOLOGY				REACTOME_AXON_GUIDANCE
EVL	Enah/Vasp-like			REACTOME_DEVELOPMENTAL_BIOLOGY				REACTOME_AXON_GUIDANCE
CAP2	CAP, adenylate cyclase-associated protein, 2 (yeast)			REACTOME_DEVELOPMENTAL_BIOLOGY				REACTOME_AXON_GUIDANCE
INS	insulin			REACTOME_DEVELOPMENTAL_BIOLOGY						REACTOME_INTEGRATION_OF_ENERGY_METABOLISM		REACTOME_REGULATION_OF_INSULIN_SECRETION
PPARG	peroxisome proliferative activated receptor, gamma			REACTOME_DEVELOPMENTAL_BIOLOGY
LPL	lipoprotein lipase			REACTOME_DEVELOPMENTAL_BIOLOGY
ANGPTL4	angiopoietin-like 4			REACTOME_DEVELOPMENTAL_BIOLOGY
ACVR2A	activin A receptor, type IIA			REACTOME_DEVELOPMENTAL_BIOLOGY
ACVR1B	activin A receptor, type IB			REACTOME_DEVELOPMENTAL_BIOLOGY
GDF1	growth differentiation factor 1			REACTOME_DEVELOPMENTAL_BIOLOGY
NEUROD1	neurogenic differentiation 1			REACTOME_DEVELOPMENTAL_BIOLOGY
GABRA1	gamma-aminobutyric acid (GABA) A receptor, alpha 1				REACTOME_TRANSMEMBRANE_TRANSPORT_OF_SMALL_MOLECULES		KEGG_NEUROACTIVE_LIGAND_RECEPTOR_INTERACTION								REACTOME_NEURONAL_SYSTEM	REACTOME_ION_CHANNEL_TRANSPORT	REACTOME_NEUROTRANSMITTER_RECEPTOR_BINDING_AND_DOWNSTREAM_TRANSMISSION_IN_THE_POSTSYNAPTIC_CELL	REACTOME_TRANSMISSION_ACROSS_CHEMICAL_SYNAPSES	REACTOME_GABA_RECEPTOR_ACTIVATION																	REACTOME_GABA_A_RECEPTOR_ACTIVATION						REACTOME_LIGAND_GATED_ION_CHANNEL_TRANSPORT
GABRA2	gamma-aminobutyric acid (GABA) A receptor, alpha 2				REACTOME_TRANSMEMBRANE_TRANSPORT_OF_SMALL_MOLECULES		KEGG_NEUROACTIVE_LIGAND_RECEPTOR_INTERACTION								REACTOME_NEURONAL_SYSTEM	REACTOME_ION_CHANNEL_TRANSPORT	REACTOME_NEUROTRANSMITTER_RECEPTOR_BINDING_AND_DOWNSTREAM_TRANSMISSION_IN_THE_POSTSYNAPTIC_CELL	REACTOME_TRANSMISSION_ACROSS_CHEMICAL_SYNAPSES	REACTOME_GABA_RECEPTOR_ACTIVATION																	REACTOME_GABA_A_RECEPTOR_ACTIVATION						REACTOME_LIGAND_GATED_ION_CHANNEL_TRANSPORT
GABRA3	gamma-aminobutyric acid (GABA) A receptor, alpha 3				REACTOME_TRANSMEMBRANE_TRANSPORT_OF_SMALL_MOLECULES		KEGG_NEUROACTIVE_LIGAND_RECEPTOR_INTERACTION								REACTOME_NEURONAL_SYSTEM	REACTOME_ION_CHANNEL_TRANSPORT	REACTOME_NEUROTRANSMITTER_RECEPTOR_BINDING_AND_DOWNSTREAM_TRANSMISSION_IN_THE_POSTSYNAPTIC_CELL	REACTOME_TRANSMISSION_ACROSS_CHEMICAL_SYNAPSES	REACTOME_GABA_RECEPTOR_ACTIVATION																	REACTOME_GABA_A_RECEPTOR_ACTIVATION						REACTOME_LIGAND_GATED_ION_CHANNEL_TRANSPORT
GABRA4	gamma-aminobutyric acid (GABA) A receptor, alpha 4				REACTOME_TRANSMEMBRANE_TRANSPORT_OF_SMALL_MOLECULES		KEGG_NEUROACTIVE_LIGAND_RECEPTOR_INTERACTION								REACTOME_NEURONAL_SYSTEM	REACTOME_ION_CHANNEL_TRANSPORT	REACTOME_NEUROTRANSMITTER_RECEPTOR_BINDING_AND_DOWNSTREAM_TRANSMISSION_IN_THE_POSTSYNAPTIC_CELL	REACTOME_TRANSMISSION_ACROSS_CHEMICAL_SYNAPSES	REACTOME_GABA_RECEPTOR_ACTIVATION																	REACTOME_GABA_A_RECEPTOR_ACTIVATION						REACTOME_LIGAND_GATED_ION_CHANNEL_TRANSPORT
GABRA5	gamma-aminobutyric acid (GABA) A receptor, alpha 5				REACTOME_TRANSMEMBRANE_TRANSPORT_OF_SMALL_MOLECULES		KEGG_NEUROACTIVE_LIGAND_RECEPTOR_INTERACTION								REACTOME_NEURONAL_SYSTEM	REACTOME_ION_CHANNEL_TRANSPORT	REACTOME_NEUROTRANSMITTER_RECEPTOR_BINDING_AND_DOWNSTREAM_TRANSMISSION_IN_THE_POSTSYNAPTIC_CELL	REACTOME_TRANSMISSION_ACROSS_CHEMICAL_SYNAPSES	REACTOME_GABA_RECEPTOR_ACTIVATION																	REACTOME_GABA_A_RECEPTOR_ACTIVATION						REACTOME_LIGAND_GATED_ION_CHANNEL_TRANSPORT
GABRB2	gamma-aminobutyric acid (GABA) A receptor, beta 2				REACTOME_TRANSMEMBRANE_TRANSPORT_OF_SMALL_MOLECULES		KEGG_NEUROACTIVE_LIGAND_RECEPTOR_INTERACTION								REACTOME_NEURONAL_SYSTEM	REACTOME_ION_CHANNEL_TRANSPORT	REACTOME_NEUROTRANSMITTER_RECEPTOR_BINDING_AND_DOWNSTREAM_TRANSMISSION_IN_THE_POSTSYNAPTIC_CELL	REACTOME_TRANSMISSION_ACROSS_CHEMICAL_SYNAPSES	REACTOME_GABA_RECEPTOR_ACTIVATION																	REACTOME_GABA_A_RECEPTOR_ACTIVATION						REACTOME_LIGAND_GATED_ION_CHANNEL_TRANSPORT
GABRB3	gamma-aminobutyric acid (GABA) A receptor, beta 3				REACTOME_TRANSMEMBRANE_TRANSPORT_OF_SMALL_MOLECULES		KEGG_NEUROACTIVE_LIGAND_RECEPTOR_INTERACTION								REACTOME_NEURONAL_SYSTEM	REACTOME_ION_CHANNEL_TRANSPORT	REACTOME_NEUROTRANSMITTER_RECEPTOR_BINDING_AND_DOWNSTREAM_TRANSMISSION_IN_THE_POSTSYNAPTIC_CELL	REACTOME_TRANSMISSION_ACROSS_CHEMICAL_SYNAPSES	REACTOME_GABA_RECEPTOR_ACTIVATION																	REACTOME_GABA_A_RECEPTOR_ACTIVATION						REACTOME_LIGAND_GATED_ION_CHANNEL_TRANSPORT
GABRG2	gamma-aminobutyric acid (GABA) A receptor, gamma 2				REACTOME_TRANSMEMBRANE_TRANSPORT_OF_SMALL_MOLECULES		KEGG_NEUROACTIVE_LIGAND_RECEPTOR_INTERACTION								REACTOME_NEURONAL_SYSTEM	REACTOME_ION_CHANNEL_TRANSPORT	REACTOME_NEUROTRANSMITTER_RECEPTOR_BINDING_AND_DOWNSTREAM_TRANSMISSION_IN_THE_POSTSYNAPTIC_CELL	REACTOME_TRANSMISSION_ACROSS_CHEMICAL_SYNAPSES	REACTOME_GABA_RECEPTOR_ACTIVATION																	REACTOME_GABA_A_RECEPTOR_ACTIVATION						REACTOME_LIGAND_GATED_ION_CHANNEL_TRANSPORT
GABRG3	gamma-aminobutyric acid (GABA) A receptor, gamma 3				REACTOME_TRANSMEMBRANE_TRANSPORT_OF_SMALL_MOLECULES		KEGG_NEUROACTIVE_LIGAND_RECEPTOR_INTERACTION								REACTOME_NEURONAL_SYSTEM	REACTOME_ION_CHANNEL_TRANSPORT	REACTOME_NEUROTRANSMITTER_RECEPTOR_BINDING_AND_DOWNSTREAM_TRANSMISSION_IN_THE_POSTSYNAPTIC_CELL	REACTOME_TRANSMISSION_ACROSS_CHEMICAL_SYNAPSES	REACTOME_GABA_RECEPTOR_ACTIVATION																	REACTOME_GABA_A_RECEPTOR_ACTIVATION						REACTOME_LIGAND_GATED_ION_CHANNEL_TRANSPORT
GLRA2	glycine receptor, alpha 2				REACTOME_TRANSMEMBRANE_TRANSPORT_OF_SMALL_MOLECULES		KEGG_NEUROACTIVE_LIGAND_RECEPTOR_INTERACTION									REACTOME_ION_CHANNEL_TRANSPORT																										REACTOME_LIGAND_GATED_ION_CHANNEL_TRANSPORT
GLRB	glycine receptor, beta				REACTOME_TRANSMEMBRANE_TRANSPORT_OF_SMALL_MOLECULES		KEGG_NEUROACTIVE_LIGAND_RECEPTOR_INTERACTION									REACTOME_ION_CHANNEL_TRANSPORT																										REACTOME_LIGAND_GATED_ION_CHANNEL_TRANSPORT
ABCC8	ATP-binding cassette, sub-family C (CFTR/MRP), member 8				REACTOME_TRANSMEMBRANE_TRANSPORT_OF_SMALL_MOLECULES					REACTOME_INTEGRATION_OF_ENERGY_METABOLISM		REACTOME_REGULATION_OF_INSULIN_SECRETION		REACTOME_POTASSIUM_CHANNELS	REACTOME_NEURONAL_SYSTEM
SLC6A12	solute carrier family 6 (neurotransmitter transporter, betaine/GABA), member 12				REACTOME_TRANSMEMBRANE_TRANSPORT_OF_SMALL_MOLECULES										REACTOME_NEURONAL_SYSTEM			REACTOME_TRANSMISSION_ACROSS_CHEMICAL_SYNAPSES										REACTOME_NEUROTRANSMITTER_RELEASE_CYCLE																	REACTOME_GABA_SYNTHESIS_RELEASE_REUPTAKE_AND_DEGRADATION
SLC32A1	solute carrier family 32 (GABA vesicular transporter), member 1				REACTOME_TRANSMEMBRANE_TRANSPORT_OF_SMALL_MOLECULES										REACTOME_NEURONAL_SYSTEM			REACTOME_TRANSMISSION_ACROSS_CHEMICAL_SYNAPSES										REACTOME_NEUROTRANSMITTER_RELEASE_CYCLE																	REACTOME_GABA_SYNTHESIS_RELEASE_REUPTAKE_AND_DEGRADATION
SLC6A1	solute carrier family 6 (neurotransmitter transporter, GABA), member 1				REACTOME_TRANSMEMBRANE_TRANSPORT_OF_SMALL_MOLECULES										REACTOME_NEURONAL_SYSTEM			REACTOME_TRANSMISSION_ACROSS_CHEMICAL_SYNAPSES										REACTOME_NEUROTRANSMITTER_RELEASE_CYCLE																	REACTOME_GABA_SYNTHESIS_RELEASE_REUPTAKE_AND_DEGRADATION
SLC6A11	solute carrier family 6 (neurotransmitter transporter, GABA), member 11				REACTOME_TRANSMEMBRANE_TRANSPORT_OF_SMALL_MOLECULES										REACTOME_NEURONAL_SYSTEM			REACTOME_TRANSMISSION_ACROSS_CHEMICAL_SYNAPSES										REACTOME_NEUROTRANSMITTER_RELEASE_CYCLE																	REACTOME_GABA_SYNTHESIS_RELEASE_REUPTAKE_AND_DEGRADATION
SLC17A7	solute carrier family 17 (sodium-dependent inorganic phosphate cotransporter), member 7				REACTOME_TRANSMEMBRANE_TRANSPORT_OF_SMALL_MOLECULES										REACTOME_NEURONAL_SYSTEM			REACTOME_TRANSMISSION_ACROSS_CHEMICAL_SYNAPSES										REACTOME_NEUROTRANSMITTER_RELEASE_CYCLE																				REACTOME_GLUTAMATE_NEUROTRANSMITTER_RELEASE_CYCLE
SLC1A1	solute carrier family 1 (neuronal/epithelial high affinity glutamate transporter, system Xag), member 1				REACTOME_TRANSMEMBRANE_TRANSPORT_OF_SMALL_MOLECULES										REACTOME_NEURONAL_SYSTEM			REACTOME_TRANSMISSION_ACROSS_CHEMICAL_SYNAPSES										REACTOME_NEUROTRANSMITTER_RELEASE_CYCLE																				REACTOME_GLUTAMATE_NEUROTRANSMITTER_RELEASE_CYCLE
SLC1A6	solute carrier family 1 (high affinity aspartate/glutamate transporter), member 6				REACTOME_TRANSMEMBRANE_TRANSPORT_OF_SMALL_MOLECULES										REACTOME_NEURONAL_SYSTEM			REACTOME_TRANSMISSION_ACROSS_CHEMICAL_SYNAPSES										REACTOME_NEUROTRANSMITTER_RELEASE_CYCLE																				REACTOME_GLUTAMATE_NEUROTRANSMITTER_RELEASE_CYCLE
SLC1A2	solute carrier family 1 (glial high affinity glutamate transporter), member 2				REACTOME_TRANSMEMBRANE_TRANSPORT_OF_SMALL_MOLECULES										REACTOME_NEURONAL_SYSTEM			REACTOME_TRANSMISSION_ACROSS_CHEMICAL_SYNAPSES
SLC1A3	solute carrier family 1 (glial high affinity glutamate transporter), member 3				REACTOME_TRANSMEMBRANE_TRANSPORT_OF_SMALL_MOLECULES										REACTOME_NEURONAL_SYSTEM			REACTOME_TRANSMISSION_ACROSS_CHEMICAL_SYNAPSES
FXYD2	FXYD domain containing ion transport regulator 2				REACTOME_TRANSMEMBRANE_TRANSPORT_OF_SMALL_MOLECULES											REACTOME_ION_CHANNEL_TRANSPORT											KEGG_CARDIAC_MUSCLE_CONTRACTION
ATP1A2	ATPase, Na+/K+ transporting, alpha 2 (+) polypeptide				REACTOME_TRANSMEMBRANE_TRANSPORT_OF_SMALL_MOLECULES											REACTOME_ION_CHANNEL_TRANSPORT											KEGG_CARDIAC_MUSCLE_CONTRACTION
ATP1A3	ATPase, Na+/K+ transporting, alpha 3 polypeptide				REACTOME_TRANSMEMBRANE_TRANSPORT_OF_SMALL_MOLECULES											REACTOME_ION_CHANNEL_TRANSPORT											KEGG_CARDIAC_MUSCLE_CONTRACTION
ATP10B	ATPase, Class V, type 10B				REACTOME_TRANSMEMBRANE_TRANSPORT_OF_SMALL_MOLECULES											REACTOME_ION_CHANNEL_TRANSPORT
ATP8A1	ATPase, aminophospholipid transporter (APLT), Class I, type 8A, member 1				REACTOME_TRANSMEMBRANE_TRANSPORT_OF_SMALL_MOLECULES											REACTOME_ION_CHANNEL_TRANSPORT
ATP8A2	ATPase, aminophospholipid transporter-like, Class I, type 8A, member 2				REACTOME_TRANSMEMBRANE_TRANSPORT_OF_SMALL_MOLECULES											REACTOME_ION_CHANNEL_TRANSPORT
SLC9A6	solute carrier family 9 (sodium/hydrogen exchanger), member 6				REACTOME_TRANSMEMBRANE_TRANSPORT_OF_SMALL_MOLECULES																						KEGG_CARDIAC_MUSCLE_CONTRACTION
AQP1	aquaporin 1 (Colton blood group)				REACTOME_TRANSMEMBRANE_TRANSPORT_OF_SMALL_MOLECULES
AQP4	aquaporin 4				REACTOME_TRANSMEMBRANE_TRANSPORT_OF_SMALL_MOLECULES
MYO5B	myosin VB				REACTOME_TRANSMEMBRANE_TRANSPORT_OF_SMALL_MOLECULES
AQP8	aquaporin 8				REACTOME_TRANSMEMBRANE_TRANSPORT_OF_SMALL_MOLECULES
SLC38A3	solute carrier family 38, member 3				REACTOME_TRANSMEMBRANE_TRANSPORT_OF_SMALL_MOLECULES
SLC4A4	solute carrier family 4, sodium bicarbonate cotransporter, member 4				REACTOME_TRANSMEMBRANE_TRANSPORT_OF_SMALL_MOLECULES
SLC6A15	solute carrier family 6, member 15				REACTOME_TRANSMEMBRANE_TRANSPORT_OF_SMALL_MOLECULES
SLC1A4	solute carrier family 1 (glutamate/neutral amino acid transporter), member 4				REACTOME_TRANSMEMBRANE_TRANSPORT_OF_SMALL_MOLECULES
SLC12A1	solute carrier family 12 (sodium/potassium/chloride transporters), member 1				REACTOME_TRANSMEMBRANE_TRANSPORT_OF_SMALL_MOLECULES
SLC24A3	solute carrier family 24 (sodium/potassium/calcium exchanger), member 3				REACTOME_TRANSMEMBRANE_TRANSPORT_OF_SMALL_MOLECULES
SLC26A4	solute carrier family 26, member 4				REACTOME_TRANSMEMBRANE_TRANSPORT_OF_SMALL_MOLECULES
SLC9A5	solute carrier family 9 (sodium/hydrogen exchanger), member 5				REACTOME_TRANSMEMBRANE_TRANSPORT_OF_SMALL_MOLECULES
GCKR	glucokinase (hexokinase 4) regulator				REACTOME_TRANSMEMBRANE_TRANSPORT_OF_SMALL_MOLECULES
SLC14A1	solute carrier family 14 (urea transporter), member 1 (Kidd blood group)				REACTOME_TRANSMEMBRANE_TRANSPORT_OF_SMALL_MOLECULES
HEPH	hephaestin				REACTOME_TRANSMEMBRANE_TRANSPORT_OF_SMALL_MOLECULES
SLC30A3	solute carrier family 30 (zinc transporter), member 3				REACTOME_TRANSMEMBRANE_TRANSPORT_OF_SMALL_MOLECULES
SLC22A6	solute carrier family 22 (organic anion transporter), member 6				REACTOME_TRANSMEMBRANE_TRANSPORT_OF_SMALL_MOLECULES
SLC2A6	solute carrier family 2 (facilitated glucose transporter), member 6				REACTOME_TRANSMEMBRANE_TRANSPORT_OF_SMALL_MOLECULES
SLCO1A2	solute carrier organic anion transporter family, member 1A2				REACTOME_TRANSMEMBRANE_TRANSPORT_OF_SMALL_MOLECULES
SLCO1C1	solute carrier organic anion transporter family, member 1C1				REACTOME_TRANSMEMBRANE_TRANSPORT_OF_SMALL_MOLECULES
SLCO2A1	solute carrier organic anion transporter family, member 2A1				REACTOME_TRANSMEMBRANE_TRANSPORT_OF_SMALL_MOLECULES
ABCC5	ATP-binding cassette, sub-family C (CFTR/MRP), member 5				REACTOME_TRANSMEMBRANE_TRANSPORT_OF_SMALL_MOLECULES
ATP6V0B	ATPase, H+ transporting, lysosomal 21kDa, V0 subunit b				REACTOME_TRANSMEMBRANE_TRANSPORT_OF_SMALL_MOLECULES
ATP6V1B2	ATPase, H+ transporting, lysosomal 56/58kDa, V1 subunit B2				REACTOME_TRANSMEMBRANE_TRANSPORT_OF_SMALL_MOLECULES
ABCG4	ATP-binding cassette, sub-family G (WHITE), member 4				REACTOME_TRANSMEMBRANE_TRANSPORT_OF_SMALL_MOLECULES
ABCA4	ATP-binding cassette, sub-family A (ABC1), member 4				REACTOME_TRANSMEMBRANE_TRANSPORT_OF_SMALL_MOLECULES
RAC3	ras-related C3 botulinum toxin substrate 3 (rho family, small GTP binding protein Rac3)					KEGG_MAPK_SIGNALING_PATHWAY			KEGG_AXON_GUIDANCE
CACNA1A	calcium channel, voltage-dependent, P/Q type, alpha 1A subunit					KEGG_MAPK_SIGNALING_PATHWAY				REACTOME_INTEGRATION_OF_ENERGY_METABOLISM	KEGG_CALCIUM_SIGNALING_PATHWAY	REACTOME_REGULATION_OF_INSULIN_SECRETION			REACTOME_NEURONAL_SYSTEM			REACTOME_TRANSMISSION_ACROSS_CHEMICAL_SYNAPSES																KEGG_LONG_TERM_DEPRESSION
CACNA1C	calcium channel, voltage-dependent, L type, alpha 1C subunit					KEGG_MAPK_SIGNALING_PATHWAY					KEGG_CALCIUM_SIGNALING_PATHWAY										KEGG_DILATED_CARDIOMYOPATHY						KEGG_CARDIAC_MUSCLE_CONTRACTION								KEGG_LONG_TERM_POTENTIATION									KEGG_ARRHYTHMOGENIC_RIGHT_VENTRICULAR_CARDIOMYOPATHY_ARVC					KEGG_VASCULAR_SMOOTH_MUSCLE_CONTRACTION
CACNA1D	calcium channel, voltage-dependent, L type, alpha 1D subunit					KEGG_MAPK_SIGNALING_PATHWAY					KEGG_CALCIUM_SIGNALING_PATHWAY										KEGG_DILATED_CARDIOMYOPATHY						KEGG_CARDIAC_MUSCLE_CONTRACTION																	KEGG_ARRHYTHMOGENIC_RIGHT_VENTRICULAR_CARDIOMYOPATHY_ARVC					KEGG_VASCULAR_SMOOTH_MUSCLE_CONTRACTION
PDGFRB	platelet-derived growth factor receptor, beta polypeptide					KEGG_MAPK_SIGNALING_PATHWAY					KEGG_CALCIUM_SIGNALING_PATHWAY																												KEGG_GAP_JUNCTION
CACNA1E	calcium channel, voltage-dependent, alpha 1E subunit					KEGG_MAPK_SIGNALING_PATHWAY					KEGG_CALCIUM_SIGNALING_PATHWAY
CACNG2	calcium channel, voltage-dependent, gamma subunit 2					KEGG_MAPK_SIGNALING_PATHWAY									REACTOME_NEURONAL_SYSTEM		REACTOME_NEUROTRANSMITTER_RECEPTOR_BINDING_AND_DOWNSTREAM_TRANSMISSION_IN_THE_POSTSYNAPTIC_CELL	REACTOME_TRANSMISSION_ACROSS_CHEMICAL_SYNAPSES			KEGG_DILATED_CARDIOMYOPATHY						KEGG_CARDIAC_MUSCLE_CONTRACTION																	KEGG_ARRHYTHMOGENIC_RIGHT_VENTRICULAR_CARDIOMYOPATHY_ARVC
CACNG4	calcium channel, voltage-dependent, gamma subunit 4					KEGG_MAPK_SIGNALING_PATHWAY									REACTOME_NEURONAL_SYSTEM		REACTOME_NEUROTRANSMITTER_RECEPTOR_BINDING_AND_DOWNSTREAM_TRANSMISSION_IN_THE_POSTSYNAPTIC_CELL	REACTOME_TRANSMISSION_ACROSS_CHEMICAL_SYNAPSES			KEGG_DILATED_CARDIOMYOPATHY						KEGG_CARDIAC_MUSCLE_CONTRACTION																	KEGG_ARRHYTHMOGENIC_RIGHT_VENTRICULAR_CARDIOMYOPATHY_ARVC
CACNG8	calcium channel, voltage-dependent, gamma subunit 8					KEGG_MAPK_SIGNALING_PATHWAY									REACTOME_NEURONAL_SYSTEM		REACTOME_NEUROTRANSMITTER_RECEPTOR_BINDING_AND_DOWNSTREAM_TRANSMISSION_IN_THE_POSTSYNAPTIC_CELL	REACTOME_TRANSMISSION_ACROSS_CHEMICAL_SYNAPSES			KEGG_DILATED_CARDIOMYOPATHY						KEGG_CARDIAC_MUSCLE_CONTRACTION																	KEGG_ARRHYTHMOGENIC_RIGHT_VENTRICULAR_CARDIOMYOPATHY_ARVC
CACNA2D3	calcium channel, voltage-dependent, alpha 2/delta 3 subunit					KEGG_MAPK_SIGNALING_PATHWAY									REACTOME_NEURONAL_SYSTEM			REACTOME_TRANSMISSION_ACROSS_CHEMICAL_SYNAPSES			KEGG_DILATED_CARDIOMYOPATHY						KEGG_CARDIAC_MUSCLE_CONTRACTION																	KEGG_ARRHYTHMOGENIC_RIGHT_VENTRICULAR_CARDIOMYOPATHY_ARVC
CACNA2D1	calcium channel, voltage-dependent, alpha 2/delta subunit 1					KEGG_MAPK_SIGNALING_PATHWAY															KEGG_DILATED_CARDIOMYOPATHY						KEGG_CARDIAC_MUSCLE_CONTRACTION																	KEGG_ARRHYTHMOGENIC_RIGHT_VENTRICULAR_CARDIOMYOPATHY_ARVC
CACNG7	calcium channel, voltage-dependent, gamma subunit 7					KEGG_MAPK_SIGNALING_PATHWAY															KEGG_DILATED_CARDIOMYOPATHY						KEGG_CARDIAC_MUSCLE_CONTRACTION																	KEGG_ARRHYTHMOGENIC_RIGHT_VENTRICULAR_CARDIOMYOPATHY_ARVC
PLA2G5	phospholipase A2, group V					KEGG_MAPK_SIGNALING_PATHWAY																												KEGG_LONG_TERM_DEPRESSION															KEGG_VASCULAR_SMOOTH_MUSCLE_CONTRACTION
NTRK2	neurotrophic tyrosine kinase, receptor, type 2					KEGG_MAPK_SIGNALING_PATHWAY																																					REACTOME_SIGNALLING_BY_NGF
DUSP7	dual specificity phosphatase 7					KEGG_MAPK_SIGNALING_PATHWAY																																					REACTOME_SIGNALLING_BY_NGF
MAPK9	mitogen-activated protein kinase 9					KEGG_MAPK_SIGNALING_PATHWAY
MAPK10	mitogen-activated protein kinase 10					KEGG_MAPK_SIGNALING_PATHWAY
MAPT	microtubule-associated protein tau					KEGG_MAPK_SIGNALING_PATHWAY
FGF12	fibroblast growth factor 12					KEGG_MAPK_SIGNALING_PATHWAY
FGF13	fibroblast growth factor 13					KEGG_MAPK_SIGNALING_PATHWAY
FGF14	fibroblast growth factor 14					KEGG_MAPK_SIGNALING_PATHWAY
MRAS	muscle RAS oncogene homolog					KEGG_MAPK_SIGNALING_PATHWAY
HSPA6	heat shock 70kDa protein 6 (HSP70B')					KEGG_MAPK_SIGNALING_PATHWAY
MAPK8IP1	mitogen-activated protein kinase 8 interacting protein 1					KEGG_MAPK_SIGNALING_PATHWAY
MAPK8IP2	mitogen-activated protein kinase 8 interacting protein 2					KEGG_MAPK_SIGNALING_PATHWAY
IL1B	interleukin 1, beta					KEGG_MAPK_SIGNALING_PATHWAY
MAP3K5	mitogen-activated protein kinase kinase kinase 5					KEGG_MAPK_SIGNALING_PATHWAY
DUSP8	dual specificity phosphatase 8					KEGG_MAPK_SIGNALING_PATHWAY
GADD45G	growth arrest and DNA-damage-inducible, gamma					KEGG_MAPK_SIGNALING_PATHWAY
DUSP5	dual specificity phosphatase 5					KEGG_MAPK_SIGNALING_PATHWAY
PTPRR	protein tyrosine phosphatase, receptor type, R					KEGG_MAPK_SIGNALING_PATHWAY
DUSP9	dual specificity phosphatase 9					KEGG_MAPK_SIGNALING_PATHWAY
DUSP14	dual specificity phosphatase 14					KEGG_MAPK_SIGNALING_PATHWAY
PTPN5	protein tyrosine phosphatase, non-receptor type 5 (striatum-enriched)					KEGG_MAPK_SIGNALING_PATHWAY
GRIN1	glutamate receptor, ionotropic, N-methyl D-aspartate 1						KEGG_NEUROACTIVE_LIGAND_RECEPTOR_INTERACTION				KEGG_CALCIUM_SIGNALING_PATHWAY				REACTOME_NEURONAL_SYSTEM		REACTOME_NEUROTRANSMITTER_RECEPTOR_BINDING_AND_DOWNSTREAM_TRANSMISSION_IN_THE_POSTSYNAPTIC_CELL	REACTOME_TRANSMISSION_ACROSS_CHEMICAL_SYNAPSES							REACTOME_ACTIVATION_OF_NMDA_RECEPTOR_UPON_GLUTAMATE_BINDING_AND_POSTSYNAPTIC_EVENTS						REACTOME_POST_NMDA_RECEPTOR_ACTIVATION_EVENTS				KEGG_LONG_TERM_POTENTIATION
GRIN2C	glutamate receptor, ionotropic, N-methyl D-aspartate 2C						KEGG_NEUROACTIVE_LIGAND_RECEPTOR_INTERACTION				KEGG_CALCIUM_SIGNALING_PATHWAY				REACTOME_NEURONAL_SYSTEM		REACTOME_NEUROTRANSMITTER_RECEPTOR_BINDING_AND_DOWNSTREAM_TRANSMISSION_IN_THE_POSTSYNAPTIC_CELL	REACTOME_TRANSMISSION_ACROSS_CHEMICAL_SYNAPSES							REACTOME_ACTIVATION_OF_NMDA_RECEPTOR_UPON_GLUTAMATE_BINDING_AND_POSTSYNAPTIC_EVENTS						REACTOME_POST_NMDA_RECEPTOR_ACTIVATION_EVENTS				KEGG_LONG_TERM_POTENTIATION
GRIN2D	glutamate receptor, ionotropic, N-methyl D-aspartate 2D						KEGG_NEUROACTIVE_LIGAND_RECEPTOR_INTERACTION				KEGG_CALCIUM_SIGNALING_PATHWAY				REACTOME_NEURONAL_SYSTEM		REACTOME_NEUROTRANSMITTER_RECEPTOR_BINDING_AND_DOWNSTREAM_TRANSMISSION_IN_THE_POSTSYNAPTIC_CELL	REACTOME_TRANSMISSION_ACROSS_CHEMICAL_SYNAPSES							REACTOME_ACTIVATION_OF_NMDA_RECEPTOR_UPON_GLUTAMATE_BINDING_AND_POSTSYNAPTIC_EVENTS						REACTOME_POST_NMDA_RECEPTOR_ACTIVATION_EVENTS				KEGG_LONG_TERM_POTENTIATION
GRM5	glutamate receptor, metabotropic 5						KEGG_NEUROACTIVE_LIGAND_RECEPTOR_INTERACTION				KEGG_CALCIUM_SIGNALING_PATHWAY																							KEGG_LONG_TERM_DEPRESSION	KEGG_LONG_TERM_POTENTIATION				KEGG_GAP_JUNCTION
P2RX7	purinergic receptor P2X, ligand-gated ion channel, 7						KEGG_NEUROACTIVE_LIGAND_RECEPTOR_INTERACTION				KEGG_CALCIUM_SIGNALING_PATHWAY
GRIA1	glutamate receptor, ionotropic, AMPA 1						KEGG_NEUROACTIVE_LIGAND_RECEPTOR_INTERACTION								REACTOME_NEURONAL_SYSTEM		REACTOME_NEUROTRANSMITTER_RECEPTOR_BINDING_AND_DOWNSTREAM_TRANSMISSION_IN_THE_POSTSYNAPTIC_CELL	REACTOME_TRANSMISSION_ACROSS_CHEMICAL_SYNAPSES							REACTOME_ACTIVATION_OF_NMDA_RECEPTOR_UPON_GLUTAMATE_BINDING_AND_POSTSYNAPTIC_EVENTS									KEGG_LONG_TERM_DEPRESSION	KEGG_LONG_TERM_POTENTIATION
GRIA3	glutamate receptor, ionotrophic, AMPA 3						KEGG_NEUROACTIVE_LIGAND_RECEPTOR_INTERACTION								REACTOME_NEURONAL_SYSTEM		REACTOME_NEUROTRANSMITTER_RECEPTOR_BINDING_AND_DOWNSTREAM_TRANSMISSION_IN_THE_POSTSYNAPTIC_CELL	REACTOME_TRANSMISSION_ACROSS_CHEMICAL_SYNAPSES							REACTOME_ACTIVATION_OF_NMDA_RECEPTOR_UPON_GLUTAMATE_BINDING_AND_POSTSYNAPTIC_EVENTS									KEGG_LONG_TERM_DEPRESSION
GRIK2	glutamate receptor, ionotropic, kainate 2						KEGG_NEUROACTIVE_LIGAND_RECEPTOR_INTERACTION								REACTOME_NEURONAL_SYSTEM		REACTOME_NEUROTRANSMITTER_RECEPTOR_BINDING_AND_DOWNSTREAM_TRANSMISSION_IN_THE_POSTSYNAPTIC_CELL	REACTOME_TRANSMISSION_ACROSS_CHEMICAL_SYNAPSES
GRIK3	glutamate receptor, ionotropic, kainate 3						KEGG_NEUROACTIVE_LIGAND_RECEPTOR_INTERACTION								REACTOME_NEURONAL_SYSTEM		REACTOME_NEUROTRANSMITTER_RECEPTOR_BINDING_AND_DOWNSTREAM_TRANSMISSION_IN_THE_POSTSYNAPTIC_CELL	REACTOME_TRANSMISSION_ACROSS_CHEMICAL_SYNAPSES
GRIK4	glutamate receptor, ionotropic, kainate 4						KEGG_NEUROACTIVE_LIGAND_RECEPTOR_INTERACTION								REACTOME_NEURONAL_SYSTEM		REACTOME_NEUROTRANSMITTER_RECEPTOR_BINDING_AND_DOWNSTREAM_TRANSMISSION_IN_THE_POSTSYNAPTIC_CELL	REACTOME_TRANSMISSION_ACROSS_CHEMICAL_SYNAPSES
GRIK5	glutamate receptor, ionotropic, kainate 5						KEGG_NEUROACTIVE_LIGAND_RECEPTOR_INTERACTION								REACTOME_NEURONAL_SYSTEM		REACTOME_NEUROTRANSMITTER_RECEPTOR_BINDING_AND_DOWNSTREAM_TRANSMISSION_IN_THE_POSTSYNAPTIC_CELL	REACTOME_TRANSMISSION_ACROSS_CHEMICAL_SYNAPSES
CHRNA4	cholinergic receptor, nicotinic, alpha 4						KEGG_NEUROACTIVE_LIGAND_RECEPTOR_INTERACTION								REACTOME_NEURONAL_SYSTEM		REACTOME_NEUROTRANSMITTER_RECEPTOR_BINDING_AND_DOWNSTREAM_TRANSMISSION_IN_THE_POSTSYNAPTIC_CELL	REACTOME_TRANSMISSION_ACROSS_CHEMICAL_SYNAPSES
CHRNB2	cholinergic receptor, nicotinic, beta 2 (neuronal)						KEGG_NEUROACTIVE_LIGAND_RECEPTOR_INTERACTION								REACTOME_NEURONAL_SYSTEM		REACTOME_NEUROTRANSMITTER_RECEPTOR_BINDING_AND_DOWNSTREAM_TRANSMISSION_IN_THE_POSTSYNAPTIC_CELL	REACTOME_TRANSMISSION_ACROSS_CHEMICAL_SYNAPSES
CRHR1	corticotropin releasing hormone receptor 1						KEGG_NEUROACTIVE_LIGAND_RECEPTOR_INTERACTION																											KEGG_LONG_TERM_DEPRESSION
TRPV1	transient receptor potential cation channel, subfamily V, member 1						KEGG_NEUROACTIVE_LIGAND_RECEPTOR_INTERACTION
THRA	thyroid hormone receptor, alpha (erythroblastic leukemia viral (v-erb-a) oncogene homolog, avian)						KEGG_NEUROACTIVE_LIGAND_RECEPTOR_INTERACTION
THRB	thyroid hormone receptor, beta (erythroblastic leukemia viral (v-erb-a) oncogene homolog 2, avian)						KEGG_NEUROACTIVE_LIGAND_RECEPTOR_INTERACTION
ADRA2C	adrenergic, alpha-2C-, receptor						KEGG_NEUROACTIVE_LIGAND_RECEPTOR_INTERACTION
GABRD	gamma-aminobutyric acid (GABA) A receptor, delta						KEGG_NEUROACTIVE_LIGAND_RECEPTOR_INTERACTION
GPR156	G protein-coupled receptor 156						KEGG_NEUROACTIVE_LIGAND_RECEPTOR_INTERACTION
GRID1	glutamate receptor, ionotropic, delta 1						KEGG_NEUROACTIVE_LIGAND_RECEPTOR_INTERACTION
GRIN3A	glutamate receptor, ionotropic, N-methyl-D-aspartate 3A						KEGG_NEUROACTIVE_LIGAND_RECEPTOR_INTERACTION
EFNB3	ephrin-B3								KEGG_AXON_GUIDANCE
EFNA3	ephrin-A3								KEGG_AXON_GUIDANCE
EPHA3	EPH receptor A3								KEGG_AXON_GUIDANCE
ABLIM2	actin binding LIM protein family, member 2								KEGG_AXON_GUIDANCE
EFNA4	ephrin-A4								KEGG_AXON_GUIDANCE
EPHB6	EPH receptor B6								KEGG_AXON_GUIDANCE
LRRC4C	leucine rich repeat containing 4C								KEGG_AXON_GUIDANCE
NTNG1	netrin G1								KEGG_AXON_GUIDANCE
SEMA6B	sema domain, transmembrane domain (TM), and cytoplasmic domain, (semaphorin) 6B								KEGG_AXON_GUIDANCE
SEMA6C	sema domain, transmembrane domain (TM), and cytoplasmic domain, (semaphorin) 6C								KEGG_AXON_GUIDANCE
KCNB1	potassium voltage-gated channel, Shab-related subfamily, member 1									REACTOME_INTEGRATION_OF_ENERGY_METABOLISM		REACTOME_REGULATION_OF_INSULIN_SECRETION		REACTOME_POTASSIUM_CHANNELS	REACTOME_NEURONAL_SYSTEM
KCNC2	potassium voltage-gated channel, Shaw-related subfamily, member 2									REACTOME_INTEGRATION_OF_ENERGY_METABOLISM		REACTOME_REGULATION_OF_INSULIN_SECRETION		REACTOME_POTASSIUM_CHANNELS	REACTOME_NEURONAL_SYSTEM
KCNJ11	potassium inwardly-rectifying channel, subfamily J, member 11									REACTOME_INTEGRATION_OF_ENERGY_METABOLISM		REACTOME_REGULATION_OF_INSULIN_SECRETION		REACTOME_POTASSIUM_CHANNELS	REACTOME_NEURONAL_SYSTEM
VAMP2	vesicle-associated membrane protein 2 (synaptobrevin 2)									REACTOME_INTEGRATION_OF_ENERGY_METABOLISM		REACTOME_REGULATION_OF_INSULIN_SECRETION			REACTOME_NEURONAL_SYSTEM			REACTOME_TRANSMISSION_ACROSS_CHEMICAL_SYNAPSES										REACTOME_NEUROTRANSMITTER_RELEASE_CYCLE																	REACTOME_GABA_SYNTHESIS_RELEASE_REUPTAKE_AND_DEGRADATION			REACTOME_GLUTAMATE_NEUROTRANSMITTER_RELEASE_CYCLE
SNAP25	synaptosomal-associated protein, 25kDa									REACTOME_INTEGRATION_OF_ENERGY_METABOLISM		REACTOME_REGULATION_OF_INSULIN_SECRETION			REACTOME_NEURONAL_SYSTEM			REACTOME_TRANSMISSION_ACROSS_CHEMICAL_SYNAPSES										REACTOME_NEUROTRANSMITTER_RELEASE_CYCLE																	REACTOME_GABA_SYNTHESIS_RELEASE_REUPTAKE_AND_DEGRADATION			REACTOME_GLUTAMATE_NEUROTRANSMITTER_RELEASE_CYCLE
STX1A	syntaxin 1A (brain)									REACTOME_INTEGRATION_OF_ENERGY_METABOLISM		REACTOME_REGULATION_OF_INSULIN_SECRETION			REACTOME_NEURONAL_SYSTEM			REACTOME_TRANSMISSION_ACROSS_CHEMICAL_SYNAPSES										REACTOME_NEUROTRANSMITTER_RELEASE_CYCLE																	REACTOME_GABA_SYNTHESIS_RELEASE_REUPTAKE_AND_DEGRADATION			REACTOME_GLUTAMATE_NEUROTRANSMITTER_RELEASE_CYCLE
STXBP1	syntaxin binding protein 1									REACTOME_INTEGRATION_OF_ENERGY_METABOLISM		REACTOME_REGULATION_OF_INSULIN_SECRETION			REACTOME_NEURONAL_SYSTEM			REACTOME_TRANSMISSION_ACROSS_CHEMICAL_SYNAPSES										REACTOME_NEUROTRANSMITTER_RELEASE_CYCLE																	REACTOME_GABA_SYNTHESIS_RELEASE_REUPTAKE_AND_DEGRADATION			REACTOME_GLUTAMATE_NEUROTRANSMITTER_RELEASE_CYCLE
SYT5	synaptotagmin V									REACTOME_INTEGRATION_OF_ENERGY_METABOLISM		REACTOME_REGULATION_OF_INSULIN_SECRETION
CAMK2B	calcium/calmodulin-dependent protein kinase (CaM kinase) II beta										KEGG_CALCIUM_SIGNALING_PATHWAY				REACTOME_NEURONAL_SYSTEM		REACTOME_NEUROTRANSMITTER_RECEPTOR_BINDING_AND_DOWNSTREAM_TRANSMISSION_IN_THE_POSTSYNAPTIC_CELL	REACTOME_TRANSMISSION_ACROSS_CHEMICAL_SYNAPSES							REACTOME_ACTIVATION_OF_NMDA_RECEPTOR_UPON_GLUTAMATE_BINDING_AND_POSTSYNAPTIC_EVENTS						REACTOME_POST_NMDA_RECEPTOR_ACTIVATION_EVENTS	KEGG_MELANOGENESIS			KEGG_LONG_TERM_POTENTIATION
CAMK2A	calcium/calmodulin-dependent protein kinase (CaM kinase) II alpha										KEGG_CALCIUM_SIGNALING_PATHWAY				REACTOME_NEURONAL_SYSTEM		REACTOME_NEUROTRANSMITTER_RECEPTOR_BINDING_AND_DOWNSTREAM_TRANSMISSION_IN_THE_POSTSYNAPTIC_CELL	REACTOME_TRANSMISSION_ACROSS_CHEMICAL_SYNAPSES							REACTOME_ACTIVATION_OF_NMDA_RECEPTOR_UPON_GLUTAMATE_BINDING_AND_POSTSYNAPTIC_EVENTS						REACTOME_POST_NMDA_RECEPTOR_ACTIVATION_EVENTS	KEGG_MELANOGENESIS			KEGG_LONG_TERM_POTENTIATION
RYR2	ryanodine receptor 2 (cardiac)										KEGG_CALCIUM_SIGNALING_PATHWAY										KEGG_DILATED_CARDIOMYOPATHY						KEGG_CARDIAC_MUSCLE_CONTRACTION																	KEGG_ARRHYTHMOGENIC_RIGHT_VENTRICULAR_CARDIOMYOPATHY_ARVC
CAMK2G	calcium/calmodulin-dependent protein kinase (CaM kinase) II gamma										KEGG_CALCIUM_SIGNALING_PATHWAY																					KEGG_MELANOGENESIS			KEGG_LONG_TERM_POTENTIATION
ITPR1	inositol 1,4,5-triphosphate receptor, type 1										KEGG_CALCIUM_SIGNALING_PATHWAY																							KEGG_LONG_TERM_DEPRESSION	KEGG_LONG_TERM_POTENTIATION				KEGG_GAP_JUNCTION										KEGG_VASCULAR_SMOOTH_MUSCLE_CONTRACTION
RYR1	ryanodine receptor 1 (skeletal)										KEGG_CALCIUM_SIGNALING_PATHWAY																							KEGG_LONG_TERM_DEPRESSION
PTK2B	PTK2B protein tyrosine kinase 2 beta										KEGG_CALCIUM_SIGNALING_PATHWAY
ITPKA	inositol 1,4,5-trisphosphate 3-kinase A										KEGG_CALCIUM_SIGNALING_PATHWAY
KCNJ9	potassium inwardly-rectifying channel, subfamily J, member 9													REACTOME_POTASSIUM_CHANNELS	REACTOME_NEURONAL_SYSTEM		REACTOME_NEUROTRANSMITTER_RECEPTOR_BINDING_AND_DOWNSTREAM_TRANSMISSION_IN_THE_POSTSYNAPTIC_CELL	REACTOME_TRANSMISSION_ACROSS_CHEMICAL_SYNAPSES	REACTOME_GABA_RECEPTOR_ACTIVATION							REACTOME_GABA_B_RECEPTOR_ACTIVATION
KCNJ10	potassium inwardly-rectifying channel, subfamily J, member 10													REACTOME_POTASSIUM_CHANNELS	REACTOME_NEURONAL_SYSTEM		REACTOME_NEUROTRANSMITTER_RECEPTOR_BINDING_AND_DOWNSTREAM_TRANSMISSION_IN_THE_POSTSYNAPTIC_CELL	REACTOME_TRANSMISSION_ACROSS_CHEMICAL_SYNAPSES	REACTOME_GABA_RECEPTOR_ACTIVATION							REACTOME_GABA_B_RECEPTOR_ACTIVATION
KCNJ16	potassium inwardly-rectifying channel, subfamily J, member 16													REACTOME_POTASSIUM_CHANNELS	REACTOME_NEURONAL_SYSTEM		REACTOME_NEUROTRANSMITTER_RECEPTOR_BINDING_AND_DOWNSTREAM_TRANSMISSION_IN_THE_POSTSYNAPTIC_CELL	REACTOME_TRANSMISSION_ACROSS_CHEMICAL_SYNAPSES	REACTOME_GABA_RECEPTOR_ACTIVATION							REACTOME_GABA_B_RECEPTOR_ACTIVATION
KCNJ4	potassium inwardly-rectifying channel, subfamily J, member 4													REACTOME_POTASSIUM_CHANNELS	REACTOME_NEURONAL_SYSTEM		REACTOME_NEUROTRANSMITTER_RECEPTOR_BINDING_AND_DOWNSTREAM_TRANSMISSION_IN_THE_POSTSYNAPTIC_CELL	REACTOME_TRANSMISSION_ACROSS_CHEMICAL_SYNAPSES	REACTOME_GABA_RECEPTOR_ACTIVATION							REACTOME_GABA_B_RECEPTOR_ACTIVATION
KCNA1	potassium voltage-gated channel, shaker-related subfamily, member 1 (episodic ataxia with myokymia)													REACTOME_POTASSIUM_CHANNELS	REACTOME_NEURONAL_SYSTEM
KCNA2	potassium voltage-gated channel, shaker-related subfamily, member 2													REACTOME_POTASSIUM_CHANNELS	REACTOME_NEURONAL_SYSTEM
KCNAB1	potassium voltage-gated channel, shaker-related subfamily, beta member 1													REACTOME_POTASSIUM_CHANNELS	REACTOME_NEURONAL_SYSTEM
KCNAB3	potassium voltage-gated channel, shaker-related subfamily, beta member 3													REACTOME_POTASSIUM_CHANNELS	REACTOME_NEURONAL_SYSTEM
KCNC1	potassium voltage-gated channel, Shaw-related subfamily, member 1													REACTOME_POTASSIUM_CHANNELS	REACTOME_NEURONAL_SYSTEM
KCNC4	potassium voltage-gated channel, Shaw-related subfamily, member 4													REACTOME_POTASSIUM_CHANNELS	REACTOME_NEURONAL_SYSTEM
KCND2	potassium voltage-gated channel, Shal-related subfamily, member 2													REACTOME_POTASSIUM_CHANNELS	REACTOME_NEURONAL_SYSTEM
KCNF1	potassium voltage-gated channel, subfamily F, member 1													REACTOME_POTASSIUM_CHANNELS	REACTOME_NEURONAL_SYSTEM
KCNH4	potassium voltage-gated channel, subfamily H (eag-related), member 4													REACTOME_POTASSIUM_CHANNELS	REACTOME_NEURONAL_SYSTEM
KCNQ4	potassium voltage-gated channel, KQT-like subfamily, member 4													REACTOME_POTASSIUM_CHANNELS	REACTOME_NEURONAL_SYSTEM
KCNK10	potassium channel, subfamily K, member 10													REACTOME_POTASSIUM_CHANNELS	REACTOME_NEURONAL_SYSTEM
KCNK2	potassium channel, subfamily K, member 2													REACTOME_POTASSIUM_CHANNELS	REACTOME_NEURONAL_SYSTEM
KCNK4	potassium channel, subfamily K, member 4													REACTOME_POTASSIUM_CHANNELS	REACTOME_NEURONAL_SYSTEM
KCNK9	potassium channel, subfamily K, member 9													REACTOME_POTASSIUM_CHANNELS	REACTOME_NEURONAL_SYSTEM
HCN1	hyperpolarization activated cyclic nucleotide-gated potassium channel 1													REACTOME_POTASSIUM_CHANNELS	REACTOME_NEURONAL_SYSTEM
HCN3	hyperpolarization activated cyclic nucleotide-gated potassium channel 3													REACTOME_POTASSIUM_CHANNELS	REACTOME_NEURONAL_SYSTEM
HCN4	hyperpolarization activated cyclic nucleotide-gated potassium channel 4													REACTOME_POTASSIUM_CHANNELS	REACTOME_NEURONAL_SYSTEM
KCNN1	potassium intermediate/small conductance calcium-activated channel, subfamily N, member 1													REACTOME_POTASSIUM_CHANNELS	REACTOME_NEURONAL_SYSTEM
KCNN2	potassium intermediate/small conductance calcium-activated channel, subfamily N, member 2													REACTOME_POTASSIUM_CHANNELS	REACTOME_NEURONAL_SYSTEM
CAMKK1	calcium/calmodulin-dependent protein kinase kinase 1, alpha														REACTOME_NEURONAL_SYSTEM		REACTOME_NEUROTRANSMITTER_RECEPTOR_BINDING_AND_DOWNSTREAM_TRANSMISSION_IN_THE_POSTSYNAPTIC_CELL	REACTOME_TRANSMISSION_ACROSS_CHEMICAL_SYNAPSES							REACTOME_ACTIVATION_OF_NMDA_RECEPTOR_UPON_GLUTAMATE_BINDING_AND_POSTSYNAPTIC_EVENTS						REACTOME_POST_NMDA_RECEPTOR_ACTIVATION_EVENTS
NCALD	neurocalcin delta														REACTOME_NEURONAL_SYSTEM		REACTOME_NEUROTRANSMITTER_RECEPTOR_BINDING_AND_DOWNSTREAM_TRANSMISSION_IN_THE_POSTSYNAPTIC_CELL	REACTOME_TRANSMISSION_ACROSS_CHEMICAL_SYNAPSES
EPB41L1	erythrocyte membrane protein band 4.1-like 1														REACTOME_NEURONAL_SYSTEM		REACTOME_NEUROTRANSMITTER_RECEPTOR_BINDING_AND_DOWNSTREAM_TRANSMISSION_IN_THE_POSTSYNAPTIC_CELL	REACTOME_TRANSMISSION_ACROSS_CHEMICAL_SYNAPSES
NSF	N-ethylmaleimide-sensitive factor														REACTOME_NEURONAL_SYSTEM		REACTOME_NEUROTRANSMITTER_RECEPTOR_BINDING_AND_DOWNSTREAM_TRANSMISSION_IN_THE_POSTSYNAPTIC_CELL	REACTOME_TRANSMISSION_ACROSS_CHEMICAL_SYNAPSES
PICK1	protein interacting with PRKCA 1														REACTOME_NEURONAL_SYSTEM		REACTOME_NEUROTRANSMITTER_RECEPTOR_BINDING_AND_DOWNSTREAM_TRANSMISSION_IN_THE_POSTSYNAPTIC_CELL	REACTOME_TRANSMISSION_ACROSS_CHEMICAL_SYNAPSES
SYT1	synaptotagmin I														REACTOME_NEURONAL_SYSTEM			REACTOME_TRANSMISSION_ACROSS_CHEMICAL_SYNAPSES										REACTOME_NEUROTRANSMITTER_RELEASE_CYCLE																	REACTOME_GABA_SYNTHESIS_RELEASE_REUPTAKE_AND_DEGRADATION			REACTOME_GLUTAMATE_NEUROTRANSMITTER_RELEASE_CYCLE
RAB3A	RAB3A, member RAS oncogene family														REACTOME_NEURONAL_SYSTEM			REACTOME_TRANSMISSION_ACROSS_CHEMICAL_SYNAPSES										REACTOME_NEUROTRANSMITTER_RELEASE_CYCLE																	REACTOME_GABA_SYNTHESIS_RELEASE_REUPTAKE_AND_DEGRADATION			REACTOME_GLUTAMATE_NEUROTRANSMITTER_RELEASE_CYCLE
RIMS1	regulating synaptic membrane exocytosis 1														REACTOME_NEURONAL_SYSTEM			REACTOME_TRANSMISSION_ACROSS_CHEMICAL_SYNAPSES										REACTOME_NEUROTRANSMITTER_RELEASE_CYCLE																	REACTOME_GABA_SYNTHESIS_RELEASE_REUPTAKE_AND_DEGRADATION			REACTOME_GLUTAMATE_NEUROTRANSMITTER_RELEASE_CYCLE
MAOA	monoamine oxidase A														REACTOME_NEURONAL_SYSTEM			REACTOME_TRANSMISSION_ACROSS_CHEMICAL_SYNAPSES										REACTOME_NEUROTRANSMITTER_RELEASE_CYCLE
SYN2	synapsin II														REACTOME_NEURONAL_SYSTEM			REACTOME_TRANSMISSION_ACROSS_CHEMICAL_SYNAPSES										REACTOME_NEUROTRANSMITTER_RELEASE_CYCLE
ACHE	acetylcholinesterase (Yt blood group)														REACTOME_NEURONAL_SYSTEM			REACTOME_TRANSMISSION_ACROSS_CHEMICAL_SYNAPSES
GJC1	gap junction protein, chi 1, 31.9kDa (connexin 31.9)														REACTOME_NEURONAL_SYSTEM
PANX2	pannexin 2														REACTOME_NEURONAL_SYSTEM
TNNT2	troponin T type 2 (cardiac)																				KEGG_DILATED_CARDIOMYOPATHY						KEGG_CARDIAC_MUSCLE_CONTRACTION
ACTC1	actin, alpha, cardiac muscle 1																				KEGG_DILATED_CARDIOMYOPATHY						KEGG_CARDIAC_MUSCLE_CONTRACTION
ITGA7	integrin, alpha 7																				KEGG_DILATED_CARDIOMYOPATHY																							KEGG_ARRHYTHMOGENIC_RIGHT_VENTRICULAR_CARDIOMYOPATHY_ARVC
DMD	dystrophin (muscular dystrophy, Duchenne and Becker types)																				KEGG_DILATED_CARDIOMYOPATHY																							KEGG_ARRHYTHMOGENIC_RIGHT_VENTRICULAR_CARDIOMYOPATHY_ARVC
COX7A1	cytochrome c oxidase subunit VIIa polypeptide 1 (muscle)																										KEGG_CARDIAC_MUSCLE_CONTRACTION
LEF1	lymphoid enhancer-binding factor 1																															KEGG_MELANOGENESIS												KEGG_ARRHYTHMOGENIC_RIGHT_VENTRICULAR_CARDIOMYOPATHY_ARVC
KIT	v-kit Hardy-Zuckerman 4 feline sarcoma viral oncogene homolog																															KEGG_MELANOGENESIS
CREB3L1	cAMP responsive element binding protein 3-like 1																															KEGG_MELANOGENESIS
TUBB2A	tubulin, beta 2A																																						KEGG_GAP_JUNCTION
TUBB3	tubulin, beta 3																																						KEGG_GAP_JUNCTION
NRG1	neuregulin 1																																							REACTOME_SIGNALING_BY_ERBB2
NRG2	neuregulin 2																																							REACTOME_SIGNALING_BY_ERBB2
RNF41	ring finger protein 41																																							REACTOME_SIGNALING_BY_ERBB2
MATK	megakaryocyte-associated tyrosine kinase																																							REACTOME_SIGNALING_BY_ERBB2
RIT2	Ras-like without CAAX 2																																										REACTOME_SIGNALLING_BY_NGF
CTNNA2	catenin (cadherin-associated protein), alpha 2																																											KEGG_ARRHYTHMOGENIC_RIGHT_VENTRICULAR_CARDIOMYOPATHY_ARVC
[truncated: 2 more columns]
