# Supplementary material for: Whole Exome- and mRNA-Sequencing of an AT/RT Case Reveals Few Somatic Mutations and Several Deregulated Signalling Pathways in the Context of SMARCB1 Deficiency
Source: Biomed Res Int. 2015 Aug 12;2015:862039. doi: 10.1155/2015/862039 (PMC4780067; doi:10.1155/2015/862039)
Supplement: Supplementary file 1 — Supl. Table 1A. Read mapping and coverage data. Exome-seq Data. Supl. Table 1B. Read mapping mRNA-seq data. Supl. Table 2. Germline variants with RNA variants and DE genes indicated. Supl. Table 3. Cuffdiff results, significantly DE genes with BMP-genes indicated. Supl. Table 4. Gene set overlap for up regulated genes. Supl. Table 5. Gene set overlap for down regulated genes. Supl. Table 6. GO for up regulated genes. Supl. Table 7. GO for down regulated genes. Supl. Fig. 1. FPKM values for the two CCDS SMARCB1 transcripts for AT/RT and Controls. NCBI accession nomenclature is used. Supl. Fig. 2. RNA reads alignment at exon 2 of SMARCB1. Genomic region Chr. 22: 24134055- 24134081 is indicated between the two red vertical lines. The yellow region on the top, represents exon 2, with introns on both sides, shown in blue. Aligned paired reads are shown in blue, while single reads are shown in red or green. Dotted lines connect each end of a read, that have been mapped across exon-exon boundaries. [file 862039.f1.zip › 862039 supl table 6 GO up.xlsx]

## Sheet: GO up
Category	Term	Count	%	PValue	Genes	List Total	Pop Hits	Pop Total	Fold Enrichment	Bonferroni	Benjamini	FDR
GOTERM_BP_FAT	GO:0007067~mitosis	50	3.24044	7.78276e-11	AURKA, PTTG1, AURKB, TTN, CD2AP, LATS2, FAM83D, CDCA8, NUP37, CDCA5, ASPM, CDK1, CDC6, KIF11, DSN1, SGOL1, TPX2, NUSAP1, UBE2C, HMGA2, WEE1, EML4, MAD2L1, TIMELESS, ZWINT, CCDC99, NEK2, USP9X, NEK1, LRRCC1, CCNG1, NCAPH, BUB1, SKA3, FBXO5, SKA1, PINX1, YEATS4, PDS5A, DLGAP5, BIRC5, CENPE, CDC20, SMC2, SMC3, SMC4, CDC25B, CCNB1, NEDD1, KIF20B	1113	220	13528	2.76239	2.8267e-07	2.8267e-07	1.43125e-07
GOTERM_BP_FAT	GO:0000280~nuclear division	50	3.24044	7.78276e-11	AURKA, PTTG1, AURKB, TTN, CD2AP, LATS2, FAM83D, CDCA8, NUP37, CDCA5, ASPM, CDK1, CDC6, KIF11, DSN1, SGOL1, TPX2, NUSAP1, UBE2C, HMGA2, WEE1, EML4, MAD2L1, TIMELESS, ZWINT, CCDC99, NEK2, USP9X, NEK1, LRRCC1, CCNG1, NCAPH, BUB1, SKA3, FBXO5, SKA1, PINX1, YEATS4, PDS5A, DLGAP5, BIRC5, CENPE, CDC20, SMC2, SMC3, SMC4, CDC25B, CCNB1, NEDD1, KIF20B	1113	220	13528	2.76239	2.8267e-07	2.8267e-07	1.43125e-07
GOTERM_BP_FAT	GO:0048285~organelle fission	51	3.30525	1.06094e-10	AURKA, PTTG1, AURKB, TTN, CD2AP, LATS2, FAM83D, CDCA8, NUP37, CDCA5, ASPM, CDK1, CDC6, KIF11, DSN1, SGOL1, TPX2, NUSAP1, HMGA2, UBE2C, WEE1, EML4, MAD2L1, TIMELESS, ZWINT, CCDC99, NEK2, USP9X, NEK1, LRRCC1, CCNG1, NCAPH, BUB1, SKA3, FBXO5, SKA1, PINX1, YEATS4, PDS5A, DLGAP5, BIRC5, CENPE, CDC20, SMC2, SMC3, SMC4, CDC25B, CCNB1, NEDD1, BAX, KIF20B	1113	229	13528	2.70691	3.85332e-07	1.92666e-07	1.95106e-07
GOTERM_BP_FAT	GO:0000087~M phase of mitotic cell cycle	50	3.24044	1.52366e-10	AURKA, PTTG1, AURKB, TTN, CD2AP, LATS2, FAM83D, CDCA8, NUP37, CDCA5, ASPM, CDK1, CDC6, KIF11, DSN1, SGOL1, TPX2, NUSAP1, UBE2C, HMGA2, WEE1, EML4, MAD2L1, TIMELESS, ZWINT, CCDC99, NEK2, USP9X, NEK1, LRRCC1, CCNG1, NCAPH, BUB1, SKA3, FBXO5, SKA1, PINX1, YEATS4, PDS5A, DLGAP5, BIRC5, CENPE, CDC20, SMC2, SMC3, SMC4, CDC25B, CCNB1, NEDD1, KIF20B	1113	224	13528	2.71307	5.53393e-07	1.84464e-07	2.80201e-07
GOTERM_BP_FAT	GO:0007059~chromosome segregation	26	1.68503	3.37721e-09	CCDC99, NEK2, USP9X, PTTG1, TTN, NCAPH, HJURP, SKA3, NUP37, SKA1, TOP2A, CDCA5, PINX1, DSN1, DLGAP5, SGOL1, NUSAP1, BIRC5, CENPE, SMC2, SMC3, BRCA1, SMC4, MAD2L1, RIOK3, ZWINT	1113	81	13528	3.90146	1.22659e-05	3.0665e-06	6.21069e-06
GOTERM_BP_FAT	GO:0048534~hemopoietic or lymphoid organ development	52	3.37006	3.66751e-09	CD8A, STAT5A, JAG1, IL15, PRDX3, CLCF1, CASP8, RHOH, CD3D, LYN, CD3E, EOMES, CDK6, SIX4, MYH9, TACC3, CD164, RPS19, LCK, SIX1, TWSG1, PML, IL7R, ITGB1, CD74, VCAM1, HOXA3, RTKN2, ZAP70, CD4, TCEA1, TLX1, BMP4, PTPRC, IKZF1, MSH2, HCLS1, SMAD5, TGFBR2, ITGA4, DNASE2, HOXB3, ATP7A, HOXB4, NOTCH2, HOXB7, BAX, SP3, IRF8, IRF1, TGFBR3, IRF4	1113	260	13528	2.43091	1.33203e-05	2.66408e-06	6.74455e-06
GOTERM_BP_FAT	GO:0002520~immune system development	54	3.49968	3.9475e-09	CD8A, STAT5A, JAG1, IL15, PRDX3, CLCF1, CASP8, RHOH, CD3D, LYN, CD3E, EOMES, CDK6, SIX4, MYH9, TACC3, CD164, RPS19, LCK, SIX1, TWSG1, PML, IL7R, ITGB1, CD74, VCAM1, HOXA3, RTKN2, ZAP70, CD4, TCEA1, TLX1, BMP4, EXO1, PTPRC, IKZF1, SWAP70, MSH2, HCLS1, SMAD5, TGFBR2, ITGA4, DNASE2, HOXB3, ATP7A, HOXB4, NOTCH2, HOXB7, BAX, SP3, IRF8, IRF1, TGFBR3, IRF4	1113	276	13528	2.37806	1.43372e-05	2.38955e-06	7.25946e-06
GOTERM_BP_FAT	GO:0030097~hemopoiesis	48	3.11082	9.12105e-09	TWSG1, CD8A, STAT5A, PML, IL15, JAG1, PRDX3, IL7R, ITGB1, CD74, VCAM1, CLCF1, CASP8, ZAP70, RTKN2, CD4, TCEA1, RHOH, BMP4, PTPRC, CD3D, LYN, IKZF1, CD3E, MSH2, HCLS1, SMAD5, TGFBR2, EOMES, CDK6, ITGA4, MYH9, CD164, TACC3, DNASE2, HOXB3, ATP7A, NOTCH2, HOXB4, RPS19, HOXB7, SP3, BAX, IRF8, LCK, IRF1, TGFBR3, IRF4	1113	236	13528	2.47211	3.31271e-05	4.73251e-06	1.67736e-05
GOTERM_BP_FAT	GO:0043009~chordate embryonic development	59	3.82372	2.42849e-08	FOXA2, PRRX1, PAX3, ZEB1, GLI2, GLI3, SHH, ZIC2, GATA6, COL4A3BP, CASP8, IPMK, GSC, EOMES, SIX4, MBNL1, MYH9, CSDA, JUNB, VASP, RBBP8, SMO, MIB1, GRN, SIX1, TGIF1, PYGO2, PRDM1, FUT8, PTK7, COL2A1, ITGB1, RGMA, PFN1, HOXA3, HOXA4, SLC30A1, HAND2, HOXA6, BMP4, LMX1B, MSH2, TGFBR2, HSPG2, FZD3, GAS1, CELSR1, BRCA1, HOXB3, HOXB4, SALL4, HOXB7, HOXB8, SP3, HOXB6, ZIC5, PHGDH, TGFBR3, POFUT1	1113	331	13528	2.16652	8.81989e-05	1.10253e-05	4.466e-05
GOTERM_BP_FAT	GO:0048598~embryonic morphogenesis	56	3.62929	2.56226e-08	FGF8, FOXA2, CRABP2, PRRX1, PAX3, ZEB1, GLI2, GLI3, SHH, ZIC2, ATOH1, CASP8, POU4F3, IPMK, GSC, EOMES, SIX4, MBNL1, VASP, MIB1, EYA2, CLIC5, SIX1, TGIF1, WNT5A, TWSG1, SOX2, UGDH, PTK7, COL2A1, PFN1, RGMA, HOXA3, HOXA4, HOXA6, FBN2, OTOP1, BMP4, TGFBR2, HSPG2, FZD3, GAS1, CELSR1, HOXB3, HOXB4, NOTCH2, SALL4, HOXB7, HOXB8, DLX5, SP3, HOXB6, ZIC5, LRP6, BMP7, KLF4	1113	307	13528	2.21711	9.30569e-05	1.03401e-05	4.71199e-05
GOTERM_BP_FAT	GO:0009792~embryonic development ending in birth or egg hatching	59	3.82372	3.35468e-08	FOXA2, PRRX1, PAX3, ZEB1, GLI2, GLI3, SHH, ZIC2, GATA6, COL4A3BP, CASP8, IPMK, GSC, EOMES, SIX4, MBNL1, MYH9, CSDA, JUNB, VASP, RBBP8, SMO, MIB1, GRN, SIX1, TGIF1, PYGO2, PRDM1, FUT8, PTK7, COL2A1, ITGB1, RGMA, PFN1, HOXA3, HOXA4, SLC30A1, HAND2, HOXA6, BMP4, LMX1B, MSH2, TGFBR2, HSPG2, FZD3, GAS1, CELSR1, BRCA1, HOXB3, HOXB4, SALL4, HOXB7, HOXB8, SP3, HOXB6, ZIC5, PHGDH, TGFBR3, POFUT1	1113	334	13528	2.14706	0.000121835	1.21841e-05	6.16926e-05
GOTERM_BP_FAT	GO:0051301~cell division	54	3.49968	4.16594e-08	CDC14A, PTTG1, AURKB, CD2AP, LATS2, FAM83D, CDCA8, CDKN2A, VPS4B, NUP37, PARD3B, CDCA5, ASPM, CDK1, CDC6, KIF11, ROCK1, DSN1, SGOL1, NUSAP1, CDK6, MYH9, HMGA2, UBE2C, WEE1, CCND1, MAD2L1, CCND3, TIMELESS, ZWINT, PARD3, NEK2, USP9X, NEK1, LRRCC1, CCNG1, NCAPH, BUB1, SKA3, FBXO5, SKA1, PDS5A, BIRC5, CENPE, CDC20, SMC2, SMC3, SMC4, CDC25B, CCNB1, HOXB4, NEDD1, CKS2, KIF20B	1113	295	13528	2.2249	0.000151296	1.37551e-05	7.66117e-05
GOTERM_BP_FAT	GO:0000279~M phase	58	3.75891	4.82846e-08	TTK, AURKA, PTTG1, AURKB, TTN, CD2AP, LATS2, FAM83D, CDCA8, NUP37, CDCA5, ASPM, CDK1, CDC6, KIF11, DSN1, SGOL1, TPX2, NUSAP1, MYH9, HMGA2, TACC3, UBE2C, WEE1, EML4, MAD2L1, TIMELESS, ZWINT, CCDC99, CEP120, NEK2, USP9X, NEK1, LRRCC1, CCNG1, NCAPH, BUB1, SKA3, FBXO5, SKA1, PINX1, EXO1, YEATS4, PDS5A, MKI67, DLGAP5, BIRC5, CENPE, CDC20, SMC2, SMC3, SMC4, CDC25B, CCNB1, NEDD1, KIF20B, CKS2, ALG11, UT…	1113	329	13528	2.14275	0.000175354	1.4614e-05	8.87954e-05
GOTERM_BP_FAT	GO:0045321~leukocyte activation	47	3.04601	5.81089e-08	TMX1, CD8A, CD8B, STAT5A, KLRK1, TLR3, TLR4, IL15, IL7R, ITGB1, CD74, VCAM1, CXCR4, CLCF1, ZAP70, CD2, CD4, ADAM9, RHOH, EXO1, PTPRC, CD3G, BST2, CD3D, LYN, IKZF1, SWAP70, CD3E, MSH2, TGFBR2, EOMES, STXBP3, SLAMF7, ITGA4, MYH9, ATP7A, CD86, PRLR, CCND3, LAX1, SP3, BAX, LCK, IRF1, IRF4, LCP1, LCP2	1113	242	13528	2.36059	0.000211029	1.62346e-05	0.000106862
GOTERM_BP_FAT	GO:0021915~neural tube development	22	1.42579	5.98417e-08	BMP4, GSC, FOXA2, PTK7, FZD3, GAS1, CELSR1, PAX3, GLI2, GLI3, SHH, VASP, ZIC2, PFN1, RGMA, SMO, MIB1, CASP8, ZIC5, PHGDH, TGIF1, IPMK	1113	68	13528	3.93235	0.000217322	1.55245e-05	0.000110049
GOTERM_BP_FAT	GO:0051726~regulation of cell cycle	58	3.75891	6.00061e-08	E2F2, STAT5A, TTK, RPS27L, LATS2, GTSE1, CDT1, CDC45, CDKN2A, TGFA, CDK1, CDC6, HERC5, NUSAP1, CDK6, TACC3, UBE2C, JUNB, RBBP8, CCND1, MAD2L1, CCND3, TIMELESS, ZWINT, BTG3, NEK2, PML, AFAP1L2, CCNG1, CALR, OBFC2A, ITGB1, ADCYAP1, HEXIM1, NPM1, BUB1, FBXO5, RUNX3, PGGT1B, BMP4, PTPRC, PLA2G16, MSH2, DLGAP5, GMNN, BRIP1, BIRC5, CENPE, PDE3A, GAS1, BRCA1, CCNB1, ETS1, BAX, KIF20B, CKS2, ID3, BMP7	1113	331	13528	2.1298	0.000217918	1.45294e-05	0.000110351
GOTERM_BP_FAT	GO:0060429~epithelium development	44	2.85159	1.73386e-07	FOXA2, PTK7, DAG1, EHF, JAG1, PAX3, GLI2, GLI3, SHH, ZIC2, PFN1, RGMA, EZR, S1PR1, GATA6, PPL, UPK1B, CASP8, VEZF1, IPMK, ADAM9, B4GALT1, BMP4, LCE4A, FOXA1, ANXA1, FZD3, FZD2, CELSR1, VASP, NOTCH2, MIB1, HOXB4, TIMELESS, FREM2, DLX5, ZIC5, SIX1, TGIF1, ID3, CA2, CSTA, BMP7, EMP1	1113	227	13528	2.35595	0.00062954	3.93578e-05	0.000318857
GOTERM_BP_FAT	GO:0006955~immune response	96	6.22165	3.0429e-07	IGLV1-44, TLR3, TLR4, APOBEC3G, IL15, IGHM, C1QC, APOBEC3F, TLR8, B2M, CXCL10, COL4A3BP, GBP7, GBP5, BST2, EOMES, SERPING1, TNFRSF14, TRAT1, IGHV3-11, C1QA, C1QB, CCR5, LILRB4, IGLV7-43, GBP4, GBP2, HLA-DRA, GBP1, ORAI1, IFIH1, IFITM2, IFITM3, OAS3, FCGRT, OAS2, CD74, IFI35, ICOS, ZAP70, IGKC, DHX58, SLAMF7, ATP7A, DDX58, OASL, TNFSF10, RGS1, APOL1, ETS1, CXCL16, TGFBR3, ITGAD, IFI6, KYNU, CD8A, …	1113	690	13528	1.69107	0.00110457	6.50086e-05	0.000559589
GOTERM_BP_FAT	GO:0007049~cell cycle	105	6.80493	3.07131e-07	S100A6, TTK, AURKA, PTTG1, AURKB, TTN, CD2AP, CDCA8, CDKN2A, MAP3K8, VPS4B, NUP37, PARD3B, CDCA5, ASPM, ESCO1, SGOL1, HMG20B, MYH9, TACC3, WEE1, AHR, UHRF1, MAD2L1, KRT18, TIMELESS, ZWINT, CCDC99, NEK2, NEK1, LRRCC1, CCNG1, CALR, ITGB1, UHMK1, PLAGL1, NPM1, FBXO5, SKA3, SKA1, CKAP2, YEATS4, MKI67, CDC20, GAS2, GAS1, BRCA1, NOTCH2, NEDD1, ALG11, UTP14C, E2F2, CDC14A, E2F7, E2F8, GTSE1, LATS2, CDT1…	1113	776	13528	1.64462	0.00111488	6.19702e-05	0.000564812
GOTERM_BP_FAT	GO:0042127~regulation of cell proliferation	106	6.86973	3.48177e-07	RARRES3, S100A6, OSMR, FGF17, STAT5A, TTK, RPS6KB1, JAG1, IL15, SHH, CXCL10, SSR1, S1PR1, CDKN2A, CDCA7, PDGFC, PRAME, CD3E, NKX2-8, SIX5, TNFRSF14, IRS1, SUZ12, CD38, TIMELESS, TGIF1, LAMC1, FGFR1, IFITM1, SOX2, IFI30, CALR, ITGB1, HOXA3, AGGF1, NPM1, RTKN2, ZAP70, RUNX3, PGGT1B, BMP4, B4GALT1, KLF5, TGFBR2, S100A11, ITGA2, GAS1, NTN1, BRCA1, POLD4, NOTCH2, ETS1, DLX5, TGFBR3, BMP7, PLAU, KLF4, …	1113	787	13528	1.63708	0.00126378	6.65546e-05	0.000640296
GOTERM_BP_FAT	GO:0022403~cell cycle phase	65	4.21257	5.57087e-07	TTK, AURKA, PTTG1, AURKB, TTN, CD2AP, LATS2, GTSE1, FAM83D, CDCA8, CDKN2A, NUP37, CDCA5, ASPM, CDK1, CDC6, KIF11, DSN1, SGOL1, TPX2, NUSAP1, CDK6, MYH9, HMGA2, TACC3, UBE2C, WEE1, RBBP8, EML4, PPM1D, CCND1, MAD2L1, TIMELESS, ZWINT, CCDC99, CEP120, NEK2, USP9X, NEK1, LRRCC1, CCNG1, ITGB1, NCAPH, BUB1, SKA3, FBXO5, SKA1, PINX1, EXO1, YEATS4, PDS5A, MKI67, DLGAP5, CDC20, BIRC5, CENPE, SMC2, SMC3, SM…	1113	414	13528	1.90832	0.00202129	0.000101162	0.00102448
GOTERM_BP_FAT	GO:0001775~cell activation	50	3.24044	6.61511e-07	CD8A, CD8B, STAT5A, TLR3, TLR4, IL15, CXCR4, CLCF1, ADAM9, RHOH, CD3G, LYN, CD3D, BST2, CD3E, EOMES, STXBP3, MYH9, CD86, CCND3, LAX1, LCK, LCP1, LCP2, TMX1, KLRK1, IL7R, ITGB1, CD74, VCAM1, CD2, ZAP70, CD4, ENTPD2, EXO1, PTPRC, IKZF1, MSH2, SWAP70, TGFBR2, SLAMF7, ITGA4, ATP7A, VWF, PRLR, BAX, SP3, IRF1, IRF4, F2R	1113	287	13528	2.11752	0.00239972	0.000114403	0.00121651
GOTERM_BP_FAT	GO:0046649~lymphocyte activation	39	2.52754	7.25946e-07	CD8A, CD8B, STAT5A, KLRK1, IL15, IL7R, ITGB1, CD74, VCAM1, CXCR4, CLCF1, ZAP70, CD2, CD4, RHOH, EXO1, PTPRC, CD3G, BST2, CD3D, IKZF1, SWAP70, CD3E, MSH2, EOMES, SLAMF7, ITGA4, MYH9, ATP7A, CD86, PRLR, CCND3, LAX1, BAX, SP3, LCK, IRF1, IRF4, LCP1	1113	199	13528	2.38204	0.00263316	0.00011984	0.00133501
GOTERM_BP_FAT	GO:0000278~mitotic cell cycle	59	3.82372	1.19851e-06	TTK, AURKA, PTTG1, AURKB, TTN, CD2AP, LATS2, GTSE1, FAM83D, CDCA8, CDKN2A, NUP37, CDCA5, ASPM, CDK1, CDC6, KIF11, DSN1, SGOL1, TPX2, NUSAP1, CDK6, HMGA2, UBE2C, WEE1, RBBP8, EML4, CCND1, PPM1D, MAD2L1, PSME1, TIMELESS, ZWINT, CCDC99, NEK2, USP9X, NEK1, LRRCC1, CCNG1, ITGB1, NCAPH, BUB1, SKA3, FBXO5, SKA1, PINX1, YEATS4, PDS5A, DLGAP5, BIRC5, CENPE, CDC20, SMC2, SMC3, SMC4, CDC25B, CCNB1, NEDD1, K…	1113	370	13528	1.93816	0.00434354	0.000189243	0.00220404
GOTERM_BP_FAT	GO:0048729~tissue morphogenesis	36	2.33312	1.27455e-06	TWSG1, DAG1, PTK7, PAX3, JAG1, GLI2, TTN, GLI3, SHH, TCF7L1, ZIC2, KRT25, RGMA, PFN1, CASP8, IPMK, RUNX3, BMP4, EOMES, FZD3, CELSR1, VASP, ATP7A, NOTCH2, MIB1, HOXB4, EYA2, TIMELESS, FREM2, ZIC5, SIX1, TGIF1, TGFBR3, CA2, BMP7, KLF4	1113	180	13528	2.43091	0.00461849	0.000192864	0.00234388
GOTERM_BP_FAT	GO:0002009~morphogenesis of an epithelium	25	1.62022	1.56431e-06	DAG1, PTK7, PAX3, JAG1, GLI2, GLI3, SHH, ZIC2, RGMA, PFN1, CASP8, IPMK, BMP4, FZD3, CELSR1, VASP, HOXB4, MIB1, NOTCH2, TIMELESS, FREM2, ZIC5, SIX1, TGIF1, CA2	1113	101	13528	3.00855	0.00566549	0.000227238	0.00287674
GOTERM_BP_FAT	GO:0048704~embryonic skeletal system morphogenesis	18	1.16656	1.86883e-06	GSC, TGFBR2, PRRX1, HSPG2, COL2A1, GAS1, SIX4, ZEB1, GLI3, HOXB3, HOXB4, HOXA3, HOXA4, HOXB7, HOXB8, HOXA6, HOXB6, SIX1	1113	57	13528	3.83827	0.00676462	0.000261027	0.00343673
GOTERM_BP_FAT	GO:0008284~positive regulation of cell proliferation	63	4.08296	2.48359e-06	S100A6, OSMR, STAT5A, FGF17, PRRX1, TTK, RPS6KB1, IL15, PRDX3, PAX3, GLI2, SHH, CXCL10, SSR1, S1PR1, ANG, HEY2, TGFA, SHC1, PDGFC, CALCRL, IL13RA1, FGF2, PRAME, LYN, CD3E, CDK6, IRS1, SUZ12, SMO, CD38, CCND1, CD86, GRN, TGIF1, LAMC1, FGFR1, SOX2, CALR, ITGB1, VCAM1, HOXA3, AGGF1, NPM1, ZAP70, RTKN2, TLX1, PGGT1B, BMP4, B4GALT1, KLF5, PTPRC, TBX2, HCLS1, TGFBR2, ITGA2, GAS1, STAT1, NTN1, CDC25B, P…	1113	414	13528	1.8496	0.00897986	0.000334034	0.00456723
GOTERM_BP_FAT	GO:0042110~T cell activation	28	1.81465	3.05765e-06	CD8A, CD8B, STAT5A, IL15, IL7R, CD74, CXCR4, CD2, ZAP70, CD4, RHOH, PTPRC, CD3G, IKZF1, CD3D, CD3E, EOMES, MYH9, ATP7A, CD86, PRLR, CCND3, BAX, SP3, LCK, IRF1, IRF4, LCP1	1113	126	13528	2.70101	0.011044	0.000396543	0.00562288
GOTERM_BP_FAT	GO:0006928~cell motion	68	4.407	7.95263e-06	NRP2, FGF19, CTHRC1, WASF2, RPS6KB1, CXCR3, PAX3, GLI2, CD2AP, SHH, VCL, CD97, ACTR2, EDNRB, ATOH1, CTGF, ANG, CXCR4, PAK4, POU4F3, ROBO3, FGF2, S100A2, ROCK1, OTX2, SIX4, MYH9, VASP, SMO, HIST1H1T, SIX1, LAMC1, SOX1, FUT8, ITGA11, ITGB2, ARPC5, CDH2, ITGB1, VCAM1, ALCAM, KAL1, PPAP2A, ETV4, RUNX3, B4GALT1, LMX1B, MSH2, PODXL, ANXA1, ITGA2, GAS1, ITGA4, NTN1, STAT3, LSP1, SEMA6A, ISL2, EPHA7, ITG…	1113	475	13528	1.74002	0.0284709	0.000995506	0.0146239
GOTERM_BP_FAT	GO:0048562~embryonic organ morphogenesis	28	1.81465	8.91548e-06	SOX2, PRRX1, COL2A1, ZEB1, GLI2, GLI3, ATOH1, HOXA3, HOXA4, HOXA6, POU4F3, OTOP1, GSC, TGFBR2, HSPG2, FZD3, GAS1, SIX4, HOXB3, HOXB4, HOXB7, HOXB8, CLIC5, DLX5, SP3, HOXB6, SIX1, BMP7	1113	133	13528	2.55885	0.0318625	0.00107879	0.0163943
GOTERM_BP_FAT	GO:0045580~regulation of T cell differentiation	16	1.03694	9.07325e-06	PTPRC, IKZF1, STAT5A, TGFBR2, IL15, ZEB1, IL7R, SHH, CD74, CD83, CD86, CDKN2A, CD2, ZAP70, IL2RG, IRF4	1113	51	13528	3.81319	0.0324171	0.00106247	0.0166844
GOTERM_BP_FAT	GO:0048568~embryonic organ development	33	2.13869	9.44555e-06	SOX2, PRRX1, COL2A1, ZEB1, GLI2, GLI3, SHH, ATOH1, HOXA3, HOXA4, HOXA6, FOXF2, POU4F3, OTOP1, GSC, TGFBR2, EOMES, HSPG2, FZD3, GAS1, SIX4, JUNB, HOXB3, HOXB4, HOXB7, HOXB8, DLX5, CLIC5, SP3, HOXB6, SIX1, PRDM1, BMP7	1113	172	13528	2.33198	0.0337246	0.0010715	0.0173689
GOTERM_BP_FAT	GO:0048706~embryonic skeletal system development	20	1.29618	1.05257e-05	GSC, TGFBR2, PRRX1, HSPG2, COL2A1, ZEB1, GAS1, SIX4, GLI3, SHH, HOXB3, HOXB4, HOXA3, HOXA4, HOXB7, HOXB8, HOXA6, SP3, HOXB6, SIX1	1113	77	13528	3.15702	0.0375082	0.0011578	0.0193551
GOTERM_BP_FAT	GO:0001841~neural tube formation	14	0.907323	1.07109e-05	PTK7, FZD3, CELSR1, PAX3, SHH, VASP, ZIC2, MIB1, RGMA, PFN1, ZIC5, CASP8, TGIF1, IPMK	1113	40	13528	4.25409	0.0381552	0.00114353	0.0196955
GOTERM_BP_FAT	GO:0035239~tube morphogenesis	27	1.74984	1.10981e-05	FOXA2, PTK7, PAX3, GLI2, GLI3, LGR4, SHH, ZIC2, RGMA, PFN1, HAND2, CXCR4, CASP8, IPMK, B4GALT1, BMP4, TGFBR2, FOXA1, FZD3, CELSR1, VASP, MIB1, TIMELESS, ZIC5, SIX1, TGIF1, BMP7	1113	127	13528	2.58404	0.0395071	0.00115101	0.0204075
GOTERM_BP_FAT	GO:0022402~cell cycle process	77	4.99028	1.13714e-05	TTK, AURKA, AURKB, PTTG1, TTN, CD2AP, LATS2, GTSE1, FAM83D, CDCA8, CDKN2A, NUP37, CDCA5, ASPM, CDC6, CDK1, KIF11, DSN1, SGOL1, TPX2, NUSAP1, CDK6, MYH9, HMGA2, TACC3, UBE2C, WEE1, EML4, RBBP8, PPM1D, CCND1, MAD2L1, PSME1, TIMELESS, ZWINT, CCDC99, CEP120, NEK2, NEK1, USP9X, LRRCC1, PML, CALR, CCNG1, ITGB1, UHMK1, PLAGL1, NCAPH, NPM1, BUB1, FBXO5, SKA3, SKA1, PINX1, EXO1, YEATS4, PDS5A, MKI67, MSH2…	1113	565	13528	1.65646	0.0404597	0.00114659	0.0209099
GOTERM_BP_FAT	GO:0009967~positive regulation of signal transduction	47	3.04601	1.72829e-05	FGF19, TWSG1, SLC44A2, LITAF, CD8A, SOX2, PRRX1, TSPAN6, TLR3, TTK, GJA1, AFAP1L2, TLR4, JAG1, LPAR1, TMED7, NOD2, MIER1, CLCF1, HMOX1, CASP8, ZAP70, TICAM2, TGFA, CD4, RHOC, AGPAT2, BMP4, SECTM1, PTPRC, BST2, LYN, CD3E, LGALS1, HCLS1, EDA2R, GAS1, ECT2, IRS1, TRAT1, LGALS9, NOTCH2, TNFSF10, NCOA3, NEDD4, LCK, BMP7, F2R	1113	295	13528	1.93649	0.0608424	0.0016951	0.0317785
GOTERM_BP_FAT	GO:0000070~mitotic sister chromatid segregation	13	0.842515	1.7483e-05	CCDC99, NEK2, DLGAP5, NUSAP1, CENPE, TTN, SMC2, SMC4, NCAPH, MAD2L1, ZWINT, CDCA5, PINX1	1113	36	13528	4.38914	0.0615249	0.00166963	0.0321464
GOTERM_BP_FAT	GO:0051094~positive regulation of developmental process	45	2.9164	1.80615e-05	MSR1, FOXA2, STAT5A, SOX2, RPS6KB1, JAG1, IL7R, GLI2, GLI3, CD74, SHH, ATOH1, AGGF1, GATA6, HEY2, ZAP70, IL2RG, INPP5D, FGF2, FNDC3B, ADAM9, B4GALT1, SH3PXD2B, BMP4, PTPRC, LYN, IKZF1, SOCS3, FOXA1, SMAD5, TGFBR2, EOMES, NTN1, JUNB, SMO, CD83, CD86, ETS1, DLX5, BAX, TGIF1, CA2, BMPR1B, BMP7, ZFHX3	1113	278	13528	1.96746	0.0634947	0.00168064	0.03321
GOTERM_BP_FAT	GO:0002521~leukocyte differentiation	27	1.74984	1.97658e-05	CD8A, STAT5A, IL15, IL7R, ITGB1, CD74, VCAM1, CLCF1, CASP8, ZAP70, CD4, RHOH, PTPRC, CD3D, IKZF1, MSH2, CD3E, TGFBR2, EOMES, ITGA4, MYH9, ATP7A, BAX, SP3, LCK, IRF1, IRF4	1113	131	13528	2.50513	0.0692737	0.00179314	0.036343
GOTERM_BP_FAT	GO:0045597~positive regulation of cell differentiation	39	2.52754	2.27614e-05	MSR1, FOXA2, STAT5A, SOX2, JAG1, IL7R, GLI2, GLI3, SHH, CD74, ATOH1, GATA6, ZAP70, IL2RG, INPP5D, FGF2, FNDC3B, BMP4, SH3PXD2B, PTPRC, LYN, IKZF1, SOCS3, FOXA1, TGFBR2, SMAD5, EOMES, NTN1, JUNB, SMO, CD83, CD86, ETS1, DLX5, TGIF1, CA2, BMPR1B, BMP7, ZFHX3	1113	229	13528	2.06999	0.0793453	0.00201432	0.0418499
GOTERM_BP_FAT	GO:0050863~regulation of T cell activation	25	1.62022	2.3091e-05	STAT5A, KLRK1, ZEB1, IL15, IL7R, SHH, CD74, VCAM1, CDKN2A, CD2, ZAP70, IL2RG, CD4, LAG3, PTPRC, IKZF1, CD3E, TGFBR2, TNFRSF14, IDO1, CD83, CD86, LAX1, LCK, IRF4	1113	117	13528	2.59712	0.080447	0.00199486	0.0424559
GOTERM_BP_FAT	GO:0000819~sister chromatid segregation	13	0.842515	2.39533e-05	CCDC99, NEK2, DLGAP5, NUSAP1, CENPE, TTN, SMC2, SMC4, NCAPH, MAD2L1, ZWINT, CDCA5, PINX1	1113	37	13528	4.27051	0.0833225	0.0020212	0.0440411
GOTERM_BP_FAT	GO:0002684~positive regulation of immune system process	40	2.59235	2.39691e-05	PLDN, STAT5A, KLRK1, TLR3, TLR4, C1R, IL15, IL7R, C1QC, AQP3, CD74, TLR8, B2M, VCAM1, NOD2, ZAP70, CD2, CD4, IL2RG, INPP5D, IL13RA1, LAG3, PTPRC, LYN, IKZF1, CD3E, TGFBR2, ITGA2, SERPING1, IDO1, TRAT1, C1QA, C1QB, CD38, CD83, CD86, LAX1, LCK, C1RL, HLA-DRA	1113	238	13528	2.04278	0.0833749	0.00197661	0.04407
GOTERM_BP_FAT	GO:0051249~regulation of lymphocyte activation	29	1.87946	2.43744e-05	PLDN, STAT5A, KLRK1, ZEB1, IL15, IL7R, SHH, CD74, VCAM1, CDKN2A, CD2, ZAP70, CD4, IL2RG, INPP5D, IL13RA1, LAG3, PTPRC, IKZF1, CD3E, TGFBR2, TNFRSF14, IDO1, CD38, CD83, CD86, LAX1, LCK, IRF4	1113	148	13528	2.38163	0.0847232	0.00196537	0.044815
GOTERM_BP_FAT	GO:0001838~embryonic epithelial tube formation	14	0.907323	2.57979e-05	PTK7, FZD3, CELSR1, PAX3, SHH, VASP, ZIC2, MIB1, RGMA, PFN1, ZIC5, CASP8, TGIF1, IPMK	1113	43	13528	3.95729	0.0894434	0.00203487	0.0474317
GOTERM_BP_FAT	GO:0030098~lymphocyte differentiation	23	1.4906	2.59269e-05	PTPRC, CD3D, IKZF1, CD8A, MSH2, CD3E, STAT5A, EOMES, ITGA4, IL15, IL7R, ITGB1, CD74, ATP7A, VCAM1, CLCF1, BAX, SP3, LCK, IRF1, ZAP70, CD4, RHOH	1113	103	13528	2.71412	0.08987	0.00200157	0.0476689
GOTERM_BP_FAT	GO:0035148~tube lumen formation	14	0.907323	3.38861e-05	PTK7, FZD3, CELSR1, PAX3, SHH, VASP, ZIC2, MIB1, RGMA, PFN1, ZIC5, CASP8, TGIF1, IPMK	1113	44	13528	3.86735	0.115804	0.00256081	0.0622982
GOTERM_BP_FAT	GO:0045619~regulation of lymphocyte differentiation	17	1.10175	3.52965e-05	PTPRC, IKZF1, STAT5A, TGFBR2, ZEB1, IL15, IL7R, SHH, CD74, CD83, CD86, CDKN2A, CD2, ZAP70, IL2RG, IRF4, INPP5D	1113	63	13528	3.2798	0.120322	0.00261289	0.0648904
GOTERM_BP_FAT	GO:0001568~blood vessel development	40	2.59235	4.6701e-05	NRP2, WASF2, PRRX1, JAG1, CDH2, SHH, ZFP36L1, S1PR1, HOXA3, AGGF1, CXCR4, CTGF, ANG, HAND2, HMOX1, CASP8, HEY2, TGFA, LOX, SOX17, VEZF1, FGF2, B4GALT1, BMP4, KLF5, TGFBR2, ITGA4, MYH9, JUNB, ANXA2, ANXA2P2, ATP7A, SMO, MIB1, LAMA4, NUS1, BAX, TGFBR3, POFUT1, PLAU	1113	245	13528	1.98441	0.156016	0.00338669	0.0858483
GOTERM_BP_FAT	GO:0048514~blood vessel morphogenesis	36	2.33312	4.7656e-05	NRP2, WASF2, PRRX1, JAG1, CDH2, SHH, ZFP36L1, S1PR1, HOXA3, AGGF1, CXCR4, CTGF, ANG, HAND2, HMOX1, CASP8, HEY2, TGFA, SOX17, VEZF1, FGF2, B4GALT1, BMP4, KLF5, TGFBR2, ITGA4, MYH9, JUNB, ANXA2P2, ANXA2, ATP7A, SMO, NUS1, BAX, POFUT1, PLAU	1113	211	13528	2.07376	0.158939	0.00338818	0.0876031
GOTERM_BP_FAT	GO:0035295~tube development	37	2.39793	5.01688e-05	WNT5A, FOXA2, PTK7, PAX3, GLI2, GLI3, SHH, LGR4, ZIC2, RGMA, PFN1, CXCR4, CTGF, GATA6, HAND2, CASP8, LOX, IPMK, FGF2, SIM2, B4GALT1, BMP4, FOXA1, TGFBR2, NKX2-8, FZD3, CELSR1, VASP, ATP7A, MIB1, TIMELESS, SP3, ZIC5, SIX1, TGIF1, BMP7, ADAMTS2	1113	220	13528	2.04417	0.16658	0.00349806	0.0922203
GOTERM_BP_FAT	GO:0030217~T cell differentiation	17	1.10175	5.33803e-05	PTPRC, CD3D, IKZF1, CD8A, CD3E, STAT5A, EOMES, IL15, IL7R, CD74, ATP7A, SP3, LCK, ZAP70, IRF1, CD4, RHOH	1113	65	13528	3.17888	0.176245	0.00365148	0.0981209
GOTERM_BP_FAT	GO:0045596~negative regulation of cell differentiation	36	2.33312	7.79207e-05	TWSG1, FOXA2, STAT5A, SOX2, TLR3, TLR4, ZEB1, REST, JAG1, ABCA1, GLI2, CALR, ITGB1, GLI3, C1QC, SHH, CD74, CETP, INPP5D, ASPM, BMP4, PRAME, CDK6, WWTR1, SIRT1, NTN1, NOTCH3, NOTCH2, MIB1, CCND1, ISL2, TGFBR3, BMP7, ZFHX3, KLF4, TOB1	1113	216	13528	2.02576	0.246495	0.00522739	0.143199
GOTERM_BP_FAT	GO:0060562~epithelial tube morphogenesis	17	1.10175	7.91601e-05	BMP4, PTK7, FZD3, CELSR1, PAX3, GLI3, SHH, VASP, ZIC2, PFN1, RGMA, MIB1, SIX1, ZIC5, CASP8, TGIF1, IPMK	1113	67	13528	3.08399	0.249879	0.00521401	0.145475
GOTERM_BP_FAT	GO:0001944~vasculature development	40	2.59235	8.02881e-05	NRP2, WASF2, PRRX1, JAG1, CDH2, SHH, ZFP36L1, S1PR1, HOXA3, AGGF1, CXCR4, CTGF, ANG, HAND2, HMOX1, CASP8, HEY2, TGFA, LOX, SOX17, VEZF1, FGF2, B4GALT1, BMP4, KLF5, TGFBR2, ITGA4, MYH9, JUNB, ANXA2, ANXA2P2, ATP7A, SMO, MIB1, LAMA4, NUS1, BAX, TGFBR3, POFUT1, PLAU	1113	251	13528	1.93698	0.252946	0.00519393	0.147547
GOTERM_BP_FAT	GO:0002694~regulation of leukocyte activation	30	1.94426	8.06864e-05	PLDN, STAT5A, KLRK1, ZEB1, IL15, IL7R, SHH, CD74, VCAM1, CDKN2A, HMOX1, CD2, ZAP70, CD4, IL2RG, INPP5D, IL13RA1, LAG3, PTPRC, IKZF1, CD3E, TGFBR2, TNFRSF14, IDO1, CD38, CD83, CD86, LAX1, LCK, IRF4	1113	166	13528	2.1966	0.254026	0.00512829	0.148278
GOTERM_BP_FAT	GO:0009611~response to wounding	70	4.53662	8.16913e-05	FOXA2, F13A1, TLR3, RPS6KB1, TLR4, IL15, C1QC, SHH, TLR8, CXCL10, CD97, CTGF, GSN, CXCR4, HMOX1, TICAM2, REG3G, LOX, XCR1, FGF2, LYN, LYZ, SERPING1, STXBP3, CDO1, CD163, C1QA, SMO, SIGLEC1, C1QB, SDC1, THBD, CCR5, CCR3, TFPI, PLA2G2D, PROS1, PLDN, NMI, CCR1, NINJ1, AFAP1L2, C1R, ITGB2, LMAN1, MDK, TIMP3, TMED7, NFATC4, ENTPD2, NOX4, B4GALT1, TGFBR2, ANXA1, EPHX2, ITGA2, IDO1, STAT3, CCNB1, NOTCH3…	1113	530	13528	1.60532	0.256744	0.00510271	0.150124
GOTERM_BP_FAT	GO:0016064~immunoglobulin mediated immune response	15	0.972132	8.43973e-05	EXO1, SWAP70, MSH2, SERPING1, C1R, LY9, C1QC, TLR8, CD74, C1QA, C1QB, NOD2, C1RL, INPP5D, HLA-DRA	1113	54	13528	3.37626	0.264014	0.00518218	0.155093
GOTERM_BP_FAT	GO:0050865~regulation of cell activation	31	2.00907	8.76277e-05	PLDN, STAT5A, KLRK1, TLR4, ZEB1, IL15, IL7R, SHH, CD74, VCAM1, CDKN2A, HMOX1, CD2, ZAP70, CD4, IL2RG, INPP5D, IL13RA1, LAG3, PTPRC, IKZF1, CD3E, TGFBR2, TNFRSF14, IDO1, CD38, CD83, CD86, LAX1, LCK, IRF4	1113	175	13528	2.15309	0.272599	0.00529058	0.161025
GOTERM_BP_FAT	GO:0006952~defense response	78	5.05509	0.000118089	KLRC4, KYNU, TLR3, BNIP3, TLR4, APOBEC3G, IL15, APOBEC3F, C1QC, TLR8, CXCL10, CD97, NOD2, TRAC, HIST1H2BK, CXCR4, HMOX1, TICAM2, REG3G, DDAH2, XCR1, TNIP1, SP100, LYN, GNLY, LYZ, SOCS6, SERPING1, CLIC1, CDO1, SP140, TRAT1, CD163, INHBB, CD84, C1QA, SIGLEC1, C1QB, CD83, CCR5, CCR3, PLA2G2D, HLA-DRA, PRF1, IFIH1, NMI, CCR1, NLRX1, AFAP1L2, C1R, ITGB2, PTPRCAP, ITGB1, CD74, TMED7, LGALS3BP, NFATC4, …	1113	615	13528	1.54155	0.348792	0.00700691	0.216944
GOTERM_BP_FAT	GO:0000075~cell cycle checkpoint	20	1.29618	0.000124672	CDC6, CDK1, MSH2, PML, BRIP1, TTK, RPS27L, CENPE, BIRC5, OBFC2A, BRCA1, GTSE1, RBBP8, CDT1, CCND1, CDC45, CDKN2A, MAD2L1, ZWINT, BUB1	1113	91	13528	2.67133	0.364179	0.00727724	0.229024
GOTERM_BP_FAT	GO:0019724~B cell mediated immunity	15	0.972132	0.00012925	EXO1, SWAP70, MSH2, SERPING1, C1R, LY9, C1QC, TLR8, CD74, C1QA, C1QB, NOD2, C1RL, INPP5D, HLA-DRA	1113	56	13528	3.25568	0.374665	0.00742417	0.237425
GOTERM_BP_FAT	GO:0010564~regulation of cell cycle process	23	1.4906	0.000129764	PTPRC, NEK2, DLGAP5, PML, TTK, NUSAP1, PDE3A, BIRC5, CENPE, GAS1, CALR, UBE2C, BRCA1, GTSE1, CDT1, CDKN2A, MAD2L1, TIMELESS, NPM1, BUB1, KIF20B, FBXO5, TGFA	1113	114	13528	2.45223	0.375831	0.00733755	0.238368
GOTERM_BP_FAT	GO:0010647~positive regulation of cell communication	48	3.11082	0.000130042	FGF19, SLC44A2, CD8A, TSPAN6, PRRX1, GJA1, TTK, TLR3, TLR4, LPAR1, JAG1, NOD2, CLCF1, MIER1, HMOX1, CASP8, TICAM2, TGFA, RHOC, AGPAT2, LYN, BST2, CD3E, IRS1, ECT2, TRAT1, NCOA3, LCK, TWSG1, LITAF, SOX2, AFAP1L2, TMED7, ZAP70, CD4, BMP4, PTPRC, SECTM1, HCLS1, LGALS1, EDA2R, ITGA2, GAS1, LGALS9, NOTCH2, TNFSF10, NEDD4, BMP7, F2R	1113	329	13528	1.77331	0.376461	0.0072405	0.238878
GOTERM_BP_FAT	GO:0002449~lymphocyte mediated immunity	17	1.10175	0.000138185	EXO1, CD8A, SWAP70, MSH2, SERPING1, C1R, SLAMF7, LY9, C1QC, TLR8, CD74, C1QA, C1QB, NOD2, C1RL, INPP5D, HLA-DRA	1113	70	13528	2.95182	0.394635	0.00757606	0.253818
GOTERM_BP_FAT	GO:0043122~regulation of I-kappaB kinase/NF-kappaB cascade	22	1.42579	0.000142851	SECTM1, CARD8, SLC44A2, BST2, LITAF, LGALS1, TSPAN6, TLR3, GJA1, TLR4, LPAR1, ECT2, LGALS9, TMED7, TNFSF10, NOD2, MIER1, HMOX1, CASP8, TICAM2, RHOC, F2R, RHOH	1113	107	13528	2.49906	0.404808	0.00771443	0.262377
GOTERM_BP_FAT	GO:0002443~leukocyte mediated immunity	19	1.23137	0.000180286	EXO1, LYN, CD8A, SWAP70, MSH2, STXBP3, SERPING1, C1R, SLAMF7, LY9, C1QC, TLR8, CD74, C1QA, C1QB, NOD2, C1RL, INPP5D, HLA-DRA	1113	86	13528	2.6853	0.480485	0.00958406	0.331028
GOTERM_BP_FAT	GO:0016331~morphogenesis of embryonic epithelium	15	0.972132	0.000193405	PTK7, FZD3, CELSR1, PAX3, GLI2, SHH, VASP, ZIC2, MIB1, RGMA, PFN1, ZIC5, CASP8, TGIF1, IPMK	1113	58	13528	3.14341	0.504661	0.0101297	0.355074
GOTERM_BP_FAT	GO:0050867~positive regulation of cell activation	22	1.42579	0.000244127	PTPRC, PLDN, IKZF1, CD3E, STAT5A, TGFBR2, KLRK1, TLR4, IL15, IL7R, CD74, VCAM1, CD83, CD38, CD86, LCK, CD2, ZAP70, CD4, IL2RG, INPP5D, IL13RA1	1113	111	13528	2.40901	0.588019	0.0125884	0.447998
GOTERM_BP_FAT	GO:0045786~negative regulation of cell cycle	18	1.16656	0.000260901	BMP4, PLA2G16, GMNN, PML, TTK, CDK6, CENPE, GAS1, LATS2, ADCYAP1, CDKN2A, MAD2L1, HEXIM1, ETS1, BTG3, BUB1, BMP7, RUNX3	1113	81	13528	2.70101	0.612374	0.0132594	0.47871
GOTERM_BP_FAT	GO:0010941~regulation of cell death	96	6.22165	0.000272865	NUAK2, STAT5A, ZMAT3, BNIP3, TLR4, RPS27L, PRDX3, GLI3, SHH, RPS3, EDNRB, TP53I3, NOD2, CDKN2A, CLCF1, AEN, HMOX1, CASP8, NQO1, DDAH2, FGF2, TOP2A, ADAM9, CDK1, CD3G, PRAME, ROCK1, CD3E, SOCS3, CSDA, BCL2L13, ECT2, STK3, TNFRSF10A, SMO, AMIGO2, CD38, KRT18, BTG2, TNFRSF10D, IGF2R, HIPK3, TNFAIP8, LCK, GSTP1, PRODH, TMX1, IFIH1, MCL1, ADAMTSL4, MGMT, STK17B, PML, COL2A1, RRM2B, CALR, TIMP3, CD74, …	1113	815	13528	1.4317	0.628862	0.0136721	0.500611
GOTERM_BP_FAT	GO:0048705~skeletal system morphogenesis	22	1.42579	0.000277663	GSC, TGFBR2, PRRX1, HSPG2, COL2A1, ZEB1, GAS1, SIX4, GLI3, HOXB3, HOXB4, HOXD8, HOXA3, HOXA4, HOXB7, CTGF, HOXB8, HOXA6, HOXB6, SIX1, NAB1, BMPR1B	1113	112	13528	2.3875	0.635275	0.0137216	0.509391
GOTERM_BP_FAT	GO:0010604~positive regulation of macromolecule metabolic process	100	6.48088	0.000290441	STAT5A, TLR3, TTK, TLR4, TLR8, SHH, ATOH1, S1PR1, GATA6, FOXF2, PDGFC, ADAM9, CD3E, MLXIPL, TNFRSF14, SIX4, IRS1, JUNB, AHR, TNKS2, SIX1, PRDM1, SMARCA1, TMX1, HMGB2, SOX2, AFAP1L2, CALR, PLAGL1, FBXO5, ZNF423, BMP4, KLF5, YEATS4, IKZF1, MAML2, FOXA1, SMAD5, TEAD1, ITGA2, CDC20, BRCA1, SALL4, NEDD4, ETS1, EAF2, BMP7, KLF4, ELF1, FOXK1, FOXA2, GJA1, PAX3, ZEB1, GLI2, GLI3, EDNRB, NOD2, CLCF1, HMOX…	1113	857	13528	1.41827	0.65182	0.0141561	0.532776
GOTERM_BP_FAT	GO:0043123~positive regulation of I-kappaB kinase/NF-kappaB cascade	20	1.29618	0.000299199	SECTM1, SLC44A2, BST2, LITAF, LGALS1, TSPAN6, TLR3, GJA1, TLR4, LPAR1, ECT2, LGALS9, TMED7, TNFSF10, NOD2, MIER1, HMOX1, CASP8, TICAM2, RHOC, F2R	1113	97	13528	2.50609	0.662724	0.0143869	0.548799
GOTERM_BP_FAT	GO:0051251~positive regulation of lymphocyte activation	20	1.29618	0.000299199	PTPRC, PLDN, IKZF1, CD3E, STAT5A, TGFBR2, KLRK1, IL15, IL7R, CD74, VCAM1, CD83, CD38, CD86, LCK, ZAP70, CD4, IL2RG, INPP5D, IL13RA1	1113	97	13528	2.50609	0.662724	0.0143869	0.548799
GOTERM_BP_FAT	GO:0002696~positive regulation of leukocyte activation	21	1.36099	0.000352798	PTPRC, PLDN, IKZF1, CD3E, STAT5A, TGFBR2, KLRK1, IL15, IL7R, CD74, VCAM1, CD83, CD38, CD86, LCK, CD2, ZAP70, CD4, IL2RG, INPP5D, IL13RA1	1113	106	13528	2.40797	0.722404	0.0167216	0.646809
GOTERM_BP_FAT	GO:0030199~collagen fibril organization	10	0.648088	0.000366701	ATP7A, LMX1B, P4HA1, COL2A1, LOX, SERPINH1, COL5A2, ADAMTS2, ANXA2P2, ANXA2	1113	29	13528	4.19122	0.736079	0.0171513	0.672219
GOTERM_BP_FAT	GO:0045621~positive regulation of lymphocyte differentiation	11	0.712897	0.000369186	CD83, PTPRC, CD86, IKZF1, STAT5A, TGFBR2, ZAP70, IL2RG, INPP5D, IL7R, CD74	1113	35	13528	3.82	0.73845	0.017047	0.676758
GOTERM_BP_FAT	GO:0045165~cell fate commitment	25	1.62022	0.000385336	MCL1, FOXA2, SOX2, PAX3, JAG1, GLI2, GLI3, ITGB1, SHH, ATOH1, FGF2, TLX1, BMP4, TBX2, SMAD5, FOXA1, GAS1, NOTCH3, SMO, NOTCH2, ISL2, EYA2, SIX1, PRDM1, KLF4	1113	139	13528	2.18607	0.753356	0.0175631	0.706264
GOTERM_BP_FAT	GO:0043067~regulation of programmed cell death	95	6.15684	0.000386812	NUAK2, STAT5A, ZMAT3, BNIP3, TLR4, RPS27L, PRDX3, GLI3, SHH, RPS3, EDNRB, TP53I3, NOD2, CDKN2A, CLCF1, AEN, HMOX1, CASP8, NQO1, DDAH2, FGF2, TOP2A, ADAM9, CDK1, CD3G, PRAME, ROCK1, CD3E, SOCS3, CSDA, BCL2L13, ECT2, STK3, TNFRSF10A, SMO, AMIGO2, CD38, KRT18, BTG2, TNFRSF10D, IGF2R, HIPK3, TNFAIP8, LCK, GSTP1, PRODH, TMX1, IFIH1, MCL1, ADAMTSL4, MGMT, STK17B, PML, COL2A1, RRM2B, CALR, TIMP3, CD74, …	1113	812	13528	1.42202	0.754675	0.0174113	0.70896
GOTERM_BP_FAT	GO:0001525~angiogenesis	26	1.68503	0.000414822	NRP2, WASF2, JAG1, SHH, S1PR1, AGGF1, HAND2, ANG, CTGF, CXCR4, HMOX1, CASP8, TGFA, SOX17, VEZF1, FGF2, KLF5, BMP4, B4GALT1, TGFBR2, MYH9, ANXA2P2, ANXA2, NUS1, POFUT1, PLAU	1113	148	13528	2.13526	0.778414	0.0184323	0.760113
GOTERM_BP_FAT	GO:0042981~regulation of apoptosis	94	6.09203	0.000421658	NUAK2, STAT5A, ZMAT3, BNIP3, TLR4, RPS27L, PRDX3, GLI3, SHH, RPS3, EDNRB, TP53I3, NOD2, CDKN2A, CLCF1, AEN, HMOX1, CASP8, NQO1, DDAH2, TOP2A, ADAM9, CDK1, CD3G, PRAME, ROCK1, CD3E, SOCS3, CSDA, BCL2L13, ECT2, STK3, TNFRSF10A, SMO, AMIGO2, CD38, KRT18, BTG2, TNFRSF10D, IGF2R, HIPK3, TNFAIP8, LCK, GSTP1, PRODH, TMX1, IFIH1, MCL1, ADAMTSL4, MGMT, STK17B, PML, COL2A1, RRM2B, CALR, TIMP3, CD74, PLAGL1…	1113	804	13528	1.42105	0.78385	0.0185069	0.772593
GOTERM_BP_FAT	GO:0012501~programmed cell death	75	4.86066	0.000435768	E2F2, NUAK2, ZMAT3, BNIP3, GJA1, PAX3, DNASE1L3, RPS3, ATOH1, CDKN2A, GSN, GATA6, CXCR4, CASP7, AEN, CASP8, POU4F3, FGF2, TOP2A, FAM176A, ROCK1, PIGT, TNFRSF14, GZMB, BCL2L13, ECT2, STK3, AHR, TNFRSF10A, KRT18, EYA2, TNFRSF10D, HIPK3, LCK, TNFAIP8, C1D, ZIM2, PRF1, GGCT, MCL1, LITAF, ADAMTSL4, STK17B, PML, ITGB2, DOCK1, HAND2, KRT8, TNFRSF19, XAF1, INPP5D, SRGN, PHLDA1, FGD4, CKAP2, CARD8, MSH2, …	1113	611	13528	1.49196	0.794653	0.0188922	0.798349
GOTERM_BP_FAT	GO:0002460~adaptive immune response based on somatic recombination of immune receptors built from immunoglobulin superfamily domains	17	1.10175	0.000441254	EXO1, CD8A, SWAP70, MSH2, TLR4, SERPING1, C1R, LY9, C1QC, TLR8, CD74, C1QA, C1QB, NOD2, C1RL, INPP5D, HLA-DRA	1113	77	13528	2.68347	0.798706	0.0189022	0.80836
GOTERM_BP_FAT	GO:0002250~adaptive immune response	17	1.10175	0.000441254	EXO1, CD8A, SWAP70, MSH2, TLR4, SERPING1, C1R, LY9, C1QC, TLR8, CD74, C1QA, C1QB, NOD2, C1RL, INPP5D, HLA-DRA	1113	77	13528	2.68347	0.798706	0.0189022	0.80836
GOTERM_BP_FAT	GO:0006915~apoptosis	74	4.79585	0.000457642	E2F2, NUAK2, ZMAT3, BNIP3, GJA1, PAX3, DNASE1L3, RPS3, ATOH1, CDKN2A, GSN, GATA6, CXCR4, CASP7, AEN, CASP8, POU4F3, FGF2, TOP2A, FAM176A, ROCK1, PIGT, TNFRSF14, GZMB, BCL2L13, ECT2, STK3, AHR, TNFRSF10A, KRT18, EYA2, TNFRSF10D, HIPK3, LCK, TNFAIP8, C1D, ZIM2, PRF1, GGCT, MCL1, LITAF, ADAMTSL4, STK17B, PML, ITGB2, DOCK1, HAND2, KRT8, TNFRSF19, XAF1, INPP5D, SRGN, PHLDA1, FGD4, CKAP2, CARD8, MSH2, …	1113	602	13528	1.49408	0.810343	0.0193692	0.838264
GOTERM_BP_FAT	GO:0046634~regulation of alpha-beta T cell activation	11	0.712897	0.00047396	CD83, PTPRC, CD86, IKZF1, CD3E, TGFBR2, ZAP70, IL2RG, TNFRSF14, IRF4, SHH	1113	36	13528	3.71389	0.821261	0.0198222	0.86803
GOTERM_BP_FAT	GO:0001843~neural tube closure	10	0.648088	0.000486033	PFN1, RGMA, ZIC5, PTK7, TGIF1, FZD3, CELSR1, PAX3, VASP, ZIC2	1113	30	13528	4.05151	0.828933	0.0200908	0.890048
GOTERM_BP_FAT	GO:0060606~tube closure	10	0.648088	0.000486033	PFN1, RGMA, ZIC5, PTK7, TGIF1, FZD3, CELSR1, PAX3, VASP, ZIC2	1113	30	13528	4.05151	0.828933	0.0200908	0.890048
GOTERM_BP_FAT	GO:0021904~dorsal/ventral neural tube patterning	7	0.453662	0.00051319	BMP4, SMO, GSC, FOXA2, GAS1, GLI2, SHH	1113	14	13528	6.07727	0.845009	0.0209634	0.939559
GOTERM_BP_FAT	GO:0016477~cell migration	40	2.59235	0.000588579	FGF19, NRP2, CTHRC1, FUT8, SOX1, WASF2, ITGA11, RPS6KB1, ITGB2, PAX3, CDH2, ITGB1, CD2AP, SHH, VCAM1, EDNRB, ATOH1, CXCR4, CTGF, ANG, PPAP2A, FGF2, S100A2, B4GALT1, LMX1B, ROCK1, PODXL, SIX4, ITGA4, MYH9, NTN1, SMO, ITGA6, BAX, CXCL16, SIX1, LRP6, TGFBR3, LAMC1, PLAU	1113	276	13528	1.76153	0.882151	0.02374	1.07688
GOTERM_BP_FAT	GO:0051172~negative regulation of nitrogen compound metabolic process	65	4.21257	0.000651453	FOXK1, REST, PAX3, ZEB1, GLI2, ZNF254, GLI3, CDT1, RPS3, CDC45, HEY2, FOXF2, ATP8B1, FGF2, CDC6, GSC, SP100, RCOR2, MLXIPL, CSDA, SUZ12, HOXD8, TIMELESS, NAB1, TGIF1, PRDM1, C1D, BTAF1, HMGB2, MTDH, SNX6, SOX2, APOC1, PML, CALR, TCF7L1, HEXIM1, NPM1, SKIL, BHLHE40, ZNF423, SIM2, ENO1, MDFI, IKZF1, TBX2, MSH2, GMNN, FOXA1, ZNF24, S100A11, WWTR1, SIRT1, STAT3, BRCA1, HOXB4, SALL4, NEDD4, IRF8, IRF2…	1113	519	13528	1.52224	0.906224	0.0259555	1.19126
GOTERM_BP_FAT	GO:0001708~cell fate specification	13	0.842515	0.000700351	BMP4, FOXA2, FOXA1, SOX2, GLI2, GLI3, ITGB1, SHH, SMO, ATOH1, EYA2, SIX1, FGF2	1113	51	13528	3.09822	0.921493	0.0275749	1.28013
GOTERM_BP_FAT	GO:0010605~negative regulation of macromolecule metabolic process	86	5.57356	0.000706046	FOXK1, BNIP3, ZEB1, REST, PAX3, GLI2, GLI3, ZNF254, SHH, RPS3, CDT1, CDC45, CDKN2A, ANG, FOXF2, HEY2, ATP8B1, FGF2, LAG3, IBTK, CDC6, SP100, GSC, RCOR2, SOCS1, MLXIPL, SERPING1, CSDA, UBE2C, TRAT1, SUZ12, INHBB, HOXD8, MAD2L1, PSME1, TIMELESS, NAB1, TGIF1, PRDM1, C1D, BTAF1, HMGB2, MTDH, SNX6, SOX2, PML, IGF2BP2, CALR, TIMP3, TCF7L1, HEXIM1, NPM1, FBXO5, BHLHE40, SKIL, INPP5D, PGGT1B, ZNF423, SIM…	1113	734	13528	1.4241	0.923101	0.0274982	1.29048
GOTERM_BP_FAT	GO:0045934~negative regulation of nucleobase, nucleoside, nucleotide and nucleic acid metabolic process	64	4.14776	0.000758849	FOXK1, REST, PAX3, ZEB1, GLI2, ZNF254, GLI3, CDT1, RPS3, CDC45, HEY2, FOXF2, ATP8B1, FGF2, CDC6, GSC, SP100, RCOR2, MLXIPL, CSDA, SUZ12, HOXD8, TIMELESS, NAB1, TGIF1, PRDM1, C1D, BTAF1, HMGB2, MTDH, SNX6, SOX2, PML, CALR, TCF7L1, HEXIM1, NPM1, SKIL, BHLHE40, ZNF423, SIM2, ENO1, MDFI, IKZF1, TBX2, MSH2, GMNN, FOXA1, ZNF24, S100A11, WWTR1, SIRT1, STAT3, BRCA1, HOXB4, SALL4, NEDD4, IRF8, IRF2, RFX3,…	1113	512	13528	1.51932	0.93653	0.029212	1.38635
GOTERM_BP_FAT	GO:0033273~response to vitamin	15	0.972132	0.00079514	BMP4, KYNU, SP100, SOX2, ITGA2, TIMP3, SHH, AQP3, CD38, CCND1, GSN, IGFBP2, BMP7, KLF4, MEST	1113	66	13528	2.76239	0.944374	0.0302675	1.4522
GOTERM_BP_FAT	GO:0006357~regulation of transcription from RNA polymerase II promoter	85	5.50875	0.000806104	ELF1, SOX21, FOXK1, FOXA2, STAT5A, DEK, ZEB1, PAX3, GLI2, ZNF254, SHH, ATOH1, S1PR1, GATA6, HMOX1, CREG1, HEY2, POU4F3, YAP1, FGF2, SP100, GSC, MLXIPL, SIX4, CSDA, JUNB, AHR, RBBP8, SUZ12, MED7, UHRF1, HOXD8, SIX1, TGIF1, PRDM1, ASCL3, HMGB2, MTDH, LITAF, SOX2, SOX7, CALR, TCF7L1, PLAGL1, PFN1, HEXIM1, HAND2, TCEA1, SKIL, VEZF1, NFATC2, TLX1, ENO1, SIM2, ZBTB7B, BMP4, MDFI, IKZF3, LMX1B, IKZF1, K…	1113	727	13528	1.42109	0.946547	0.0303606	1.47208
GOTERM_BP_FAT	GO:0045582~positive regulation of T cell differentiation	10	0.648088	0.000820404	CD83, PTPRC, CD86, IKZF1, STAT5A, TGFBR2, ZAP70, IL2RG, IL7R, CD74	1113	32	13528	3.79829	0.949254	0.0305742	1.49801
GOTERM_BP_FAT	GO:0001501~skeletal system development	44	2.85159	0.000852025	WNT5A, TWSG1, FGFR1, PRRX1, COL2A1, ZEB1, GLI2, GLI3, SHH, HOXA3, HOXA4, CTGF, HOXA6, GPNMB, BMP4, MATN3, GSC, CMKLR1, TGFBR2, SMAD5, FBN1, HSPG2, SIX4, GAS1, SPARC, WWTR1, COL5A2, ANXA2, HOXB3, ATP7A, SMO, HOXB4, CHRDL2, HOXD8, HOXB7, HOXB8, SP3, DLX5, KAZALD1, HOXB6, NAB1, SIX1, BMPR1B, BMP7	1113	319	13528	1.67649	0.954765	0.0314123	1.55532
GOTERM_BP_FAT	GO:0008219~cell death	84	5.44394	0.000879726	E2F2, NUAK2, ZMAT3, BNIP3, GJA1, PAX3, DNASE1L3, RPS3, ATOH1, CDKN2A, ANG, GSN, GATA6, CXCR4, CASP7, AEN, HMOX1, CASP8, POU4F3, FGF2, TOP2A, FAM176A, ROCK1, SLC33A1, LYZ, PIGT, TNFRSF14, GZMB, BCL2L13, ECT2, STK3, AHR, TNFRSF10A, KRT18, EYA2, TNFRSF10D, HIPK3, LCK, TNFAIP8, CTSD, C1D, ZIM2, PRF1, GGCT, MCL1, LITAF, ADAMTSL4, STK17B, PML, ITGB2, DOCK1, HAND2, KRT8, TMEM123, TNFRSF19, XAF1, INPP5D,…	1113	719	13528	1.42	0.959098	0.0320918	1.6055
GOTERM_BP_FAT	GO:0051174~regulation of phosphorus metabolic process	61	3.95334	0.000882433	TLR3, TTK, TLR4, LPAR1, PRDX3, TTN, LATS2, EDNRB, NOD2, CDKN2A, ANG, CLCF1, CXCR4, TGFA, SHC1, PDGFC, PDGFD, SPRED1, FGF2, ADAM9, IBTK, CDC6, LYN, CD3E, SOCS3, SOCS1, HERC5, TNFRSF14, IRS1, TNFRSF10A, CCND1, CCND3, LAX1, HIPK3, PARD3, SNX6, MAP4K1, ITGB2, CCNG1, CD74, HEXIM1, NPM1, CD4, PPAP2A, CD6, FGD4, BMP4, MDFI, PTPRC, HCLS1, TGFBR2, ITGA2, CENPE, CDC25B, ATP7A, PPP1R2, PRLR, BAX, CKS2, BMP7…	1113	485	13528	1.52871	0.959498	0.0318691	1.6104
GOTERM_BP_FAT	GO:0019220~regulation of phosphate metabolic process	61	3.95334	0.000882433	TLR3, TTK, TLR4, LPAR1, PRDX3, TTN, LATS2, EDNRB, NOD2, CDKN2A, ANG, CLCF1, CXCR4, TGFA, SHC1, PDGFC, PDGFD, SPRED1, FGF2, ADAM9, IBTK, CDC6, LYN, CD3E, SOCS3, SOCS1, HERC5, TNFRSF14, IRS1, TNFRSF10A, CCND1, CCND3, LAX1, HIPK3, PARD3, SNX6, MAP4K1, ITGB2, CCNG1, CD74, HEXIM1, NPM1, CD4, PPAP2A, CD6, FGD4, BMP4, MDFI, PTPRC, HCLS1, TGFBR2, ITGA2, CENPE, CDC25B, ATP7A, PPP1R2, PRLR, BAX, CKS2, BMP7…	1113	485	13528	1.52871	0.959498	0.0318691	1.6104
GOTERM_BP_FAT	GO:0001932~regulation of protein amino acid phosphorylation	28	1.81465	0.000891229	TTK, MAP4K1, ITGB2, TLR4, EDNRB, NOD2, CLCF1, CD4, PDGFC, PDGFD, CD6, FGF2, FGD4, MDFI, IBTK, BMP4, PTPRC, LYN, SOCS3, CD3E, HCLS1, SOCS1, TNFRSF14, CCND1, CCND3, BAX, HIPK3, BMP7	1113	173	13528	1.96721	0.960773	0.0318651	1.62633
GOTERM_BP_FAT	GO:0042325~regulation of phosphorylation	59	3.82372	0.000913822	TLR3, TTK, TLR4, LPAR1, PRDX3, TTN, LATS2, EDNRB, NOD2, CDKN2A, ANG, CLCF1, CXCR4, TGFA, SHC1, PDGFC, PDGFD, SPRED1, FGF2, ADAM9, IBTK, CDC6, LYN, CD3E, SOCS3, SOCS1, HERC5, TNFRSF14, IRS1, TNFRSF10A, CCND1, CCND3, LAX1, HIPK3, PARD3, SNX6, MAP4K1, ITGB2, CCNG1, CD74, HEXIM1, NPM1, CD4, PPAP2A, CD6, FGD4, BMP4, MDFI, PTPRC, HCLS1, TGFBR2, CENPE, CDC25B, ATP7A, PRLR, BAX, CKS2, BMP7, F2R	1113	466	13528	1.53888	0.963866	0.0323419	1.66723
GOTERM_BP_FAT	GO:0007155~cell adhesion	82	5.31432	0.000960797	NRP2, MPZL2, CXCR3, LY9, CD2AP, PNN, VCL, CD97, CD96, S1PR1, CTGF, ADAM8, ADAM9, ROCK1, PCDHB5, PCDHB3, SDK2, STXBP3, MYH9, CD164, CD84, NCAM2, AMIGO2, SIGLEC1, CCR3, LAMC1, RAB13, CLDN17, PARD3, CCR1, ITGB4, PTK7, ITGA11, ITGA10, NINJ1, PCDHB14, COL2A1, ITGB2, CDH2, PCDHB11, ITGB1, PCDHB10, VCAM1, ALCAM, IGSF11, LGALS3BP, EZR, AGGF1, KAL1, PSTPIP1, CD2, CD4, EMB, AMICA1, COL8A1, GPNMB, CD6, B4GA…	1113	700	13528	1.42382	0.969538	0.0336492	1.75222
GOTERM_BP_FAT	GO:0010558~negative regulation of macromolecule biosynthetic process	67	4.34219	0.000965541	FOXK1, REST, PAX3, ZEB1, GLI2, ZNF254, GLI3, CDT1, CDC45, ANG, HEY2, FOXF2, ATP8B1, FGF2, LAG3, CDC6, GSC, SP100, RCOR2, MLXIPL, CSDA, SUZ12, INHBB, HOXD8, TIMELESS, NAB1, TGIF1, PRDM1, C1D, BTAF1, HMGB2, MTDH, SNX6, SOX2, PML, IGF2BP2, CALR, TCF7L1, HEXIM1, INPP5D, SKIL, BHLHE40, PGGT1B, ZNF423, SIM2, ENO1, MDFI, IKZF1, TBX2, GMNN, FOXA1, ZNF24, S100A11, WWTR1, SIRT1, STAT3, BRCA1, HOXB4, SALL4,…	1113	547	13528	1.48876	0.970059	0.0334899	1.7608
GOTERM_BP_FAT	GO:0022610~biological adhesion	82	5.31432	0.00100395	NRP2, MPZL2, CXCR3, LY9, CD2AP, PNN, VCL, CD97, CD96, S1PR1, CTGF, ADAM8, ADAM9, ROCK1, PCDHB5, PCDHB3, SDK2, STXBP3, MYH9, CD164, CD84, NCAM2, AMIGO2, SIGLEC1, CCR3, LAMC1, RAB13, CLDN17, PARD3, CCR1, ITGB4, PTK7, ITGA11, ITGA10, NINJ1, PCDHB14, COL2A1, ITGB2, CDH2, PCDHB11, ITGB1, PCDHB10, VCAM1, ALCAM, IGSF11, LGALS3BP, EZR, AGGF1, KAL1, PSTPIP1, CD2, CD4, EMB, AMICA1, COL8A1, GPNMB, CD6, B4GA…	1113	701	13528	1.42179	0.973962	0.0344706	1.83024
GOTERM_BP_FAT	GO:0014020~primary neural tube formation	10	0.648088	0.00104684	PFN1, RGMA, ZIC5, PTK7, TGIF1, FZD3, CELSR1, PAX3, VASP, ZIC2	1113	33	13528	3.68319	0.977721	0.0355813	1.90772
GOTERM_BP_FAT	GO:0007411~axon guidance	20	1.29618	0.00106302	NRP2, OTX2, GAS1, GLI2, NTN1, SHH, VASP, ALCAM, SEMA6A, ATOH1, EPHA7, ISL2, CXCR4, KAL1, POU4F3, ROBO3, BMP7, BMPR1B, ETV4, RUNX3	1113	107	13528	2.27188	0.978994	0.0357867	1.93693
GOTERM_BP_FAT	GO:0043010~camera-type eye development	20	1.29618	0.00106302	BMP4, TWSG1, SOX1, IKZF1, LMX1B, SOX2, SIX5, ZEB1, GAS1, NHS, GLI3, SHH, BAX, SP3, TGIF1, PYGO2, BMP7, COL8A1, BMPR1B, KLF4	1113	107	13528	2.27188	0.978994	0.0357867	1.93693
GOTERM_BP_FAT	GO:0007423~sensory organ development	34	2.2035	0.00107372	TWSG1, SOX1, SOX2, PRRX1, COL2A1, ZEB1, JAG1, NHS, GLI3, SHH, ATOH1, POU4F3, COL8A1, OTOP1, BMP4, GSC, IKZF1, LMX1B, SIX5, FZD3, GAS1, SIX4, COL5A2, STAT3, CLIC5, DLX5, BAX, SP3, SIX1, TGIF1, PYGO2, BMPR1B, BMP7, KLF4	1113	229	13528	1.8046	0.979795	0.035809	1.95625
GOTERM_BP_FAT	GO:0009991~response to extracellular stimulus	33	2.13869	0.0010836	LDHA, KYNU, NUAK2, SOX2, RPS6KB1, TIMP3, SHH, AQP3, GSN, HMOX1, HSPA5, DDAH2, MEST, BMP4, NES, SP100, LYN, SOCS3, BCKDHB, TGFBR2, AXL, ITGA2, CLIC1, STAT1, SIRT1, CD38, CCND1, RPS19, ITGA6, CTSD, BMP7, IGFBP2, KLF4	1113	220	13528	1.82318	0.980508	0.0358041	1.97407
GOTERM_BP_FAT	GO:0016265~death	84	5.44394	0.00110378	E2F2, NUAK2, ZMAT3, BNIP3, GJA1, PAX3, DNASE1L3, RPS3, ATOH1, CDKN2A, ANG, GSN, GATA6, CXCR4, CASP7, AEN, HMOX1, CASP8, POU4F3, FGF2, TOP2A, FAM176A, ROCK1, SLC33A1, LYZ, PIGT, TNFRSF14, GZMB, BCL2L13, ECT2, STK3, AHR, TNFRSF10A, KRT18, EYA2, TNFRSF10D, HIPK3, LCK, TNFAIP8, CTSD, C1D, ZIM2, PRF1, GGCT, MCL1, LITAF, ADAMTSL4, STK17B, PML, ITGB2, DOCK1, HAND2, KRT8, TMEM123, TNFRSF19, XAF1, INPP5D,…	1113	724	13528	1.41019	0.981887	0.0361306	2.01049
GOTERM_BP_FAT	GO:0010740~positive regulation of protein kinase cascade	27	1.74984	0.00114064	FGF19, SLC44A2, LITAF, TSPAN6, GJA1, TLR3, TLR4, LPAR1, TMED7, NOD2, MIER1, CLCF1, HMOX1, CASP8, TICAM2, RHOC, PTPRC, SECTM1, BST2, LYN, LGALS1, HCLS1, EDA2R, ECT2, LGALS9, TNFSF10, NEDD4, F2R	1113	167	13528	1.9651	0.984159	0.0369822	2.07696
GOTERM_BP_FAT	GO:0050870~positive regulation of T cell activation	16	1.03694	0.001155	PTPRC, IKZF1, CD3E, STAT5A, TGFBR2, KLRK1, IL15, IL7R, CD74, VCAM1, CD83, CD86, LCK, ZAP70, IL2RG, CD4	1113	76	13528	2.55885	0.984965	0.0371082	2.10284
GOTERM_BP_FAT	GO:0007389~pattern specification process	38	2.46273	0.00115526	FOXA2, ZEB1, GLI2, GLI3, SHH, TCF7L1, HOXA3, HOXA4, CXCR4, HOXA6, SIM2, MDFI, BMP4, GSC, LMX1B, TGFBR2, SMAD5, GAS1, RTTN, HOXB3, NOTCH2, SMO, HOXB4, MIB1, HOXD8, BTG2, HOXB7, CYP26C1, HOXB8, HOXB6, SIX1, LRP6, TGIF1, RFX3, PBX3, BMPR1B, BMP7, POFUT1	1113	267	13528	1.72986	0.98498	0.0367913	2.10332
GOTERM_BP_FAT	GO:0031327~negative regulation of cellular biosynthetic process	68	4.407	0.00116025	FGF19, FOXK1, REST, PAX3, ZEB1, GLI2, GLI3, ZNF254, CDT1, CDC45, ANG, HEY2, FOXF2, ATP8B1, FGF2, LAG3, CDC6, SP100, GSC, RCOR2, MLXIPL, CSDA, SUZ12, INHBB, HOXD8, TIMELESS, NAB1, TGIF1, PRDM1, C1D, BTAF1, HMGB2, MTDH, SNX6, SOX2, APOC1, PML, IGF2BP2, CALR, TCF7L1, HEXIM1, INPP5D, SKIL, BHLHE40, ZNF423, SIM2, ENO1, MDFI, IKZF1, TBX2, GMNN, FOXA1, ZNF24, S100A11, WWTR1, SIRT1, STAT3, BRCA1, HOXB4, …	1113	561	13528	1.47328	0.98525	0.0366265	2.11232
GOTERM_BP_FAT	GO:0060541~respiratory system development	20	1.29618	0.00119283	WNT5A, BMP4, FOXA2, NKX2-8, SOX2, ANO1, FOXA1, TGFBR2, GLI2, GLI3, SHH, ATP7A, TIMELESS, CTGF, GATA6, SP3, LOX, FGF2, ADAMTS2, SIM2	1113	108	13528	2.25084	0.986897	0.0373118	2.171
GOTERM_BP_FAT	GO:0031328~positive regulation of cellular biosynthetic process	80	5.18471	0.00121521	ELF1, FOXK1, FOXA2, STAT5A, TLR3, TLR4, ZEB1, PAX3, GLI2, GLI3, TLR8, SHH, ATOH1, NOD2, S1PR1, GATA6, HMOX1, FOXF2, SERTAD3, PDGFC, SHC1, YAP1, FGF2, SP100, CD3E, MLXIPL, SIX4, IRS1, JUNB, AHR, TNKS2, MED7, CD86, NCOA3, SIX1, SMARCA1, TMX1, HMGB2, SOX2, KLRK1, AFAP1L2, EHF, ABCA1, CALR, TCF7L1, PLAGL1, HAND2, NPM1, TCEA1, CD4, NFATC2, ETV4, TLX1, ZNF423, KLF5, ZBTB7B, BMP4, SOAT1, YEATS4, LMX1B, …	1113	685	13528	1.41951	0.987922	0.0376749	2.21132
GOTERM_BP_FAT	GO:0009890~negative regulation of biosynthetic process	69	4.47181	0.00124785	FGF19, FOXK1, REST, PAX3, ZEB1, GLI2, GLI3, ZNF254, CDT1, CDC45, ANG, HEY2, FOXF2, ATP8B1, FGF2, LAG3, CDC6, SP100, GSC, RCOR2, MLXIPL, CSDA, SUZ12, INHBB, HOXD8, TIMELESS, NAB1, TGIF1, PRDM1, C1D, BTAF1, HMGB2, MTDH, SNX6, SOX2, APOC1, PML, IGF2BP2, CALR, TCF7L1, HEXIM1, INPP5D, SKIL, BHLHE40, PGGT1B, ZNF423, SIM2, ENO1, MDFI, IKZF1, TBX2, GMNN, FOXA1, ZNF24, S100A11, WWTR1, SIRT1, STAT3, BRCA1,…	1113	573	13528	1.46364	0.989273	0.0383407	2.27007
GOTERM_BP_FAT	GO:0002252~immune effector process	23	1.4906	0.00132045	EXO1, PTPRC, LYN, CD8A, SWAP70, MSH2, BNIP3, STXBP3, SERPING1, C1R, SLAMF7, LY9, IL7R, C1QC, TLR8, CD74, C1QA, C1QB, NOD2, LAX1, C1RL, INPP5D, HLA-DRA	1113	134	13528	2.08623	0.991762	0.0401875	2.40062
GOTERM_BP_FAT	GO:0051674~localization of cell	42	2.72197	0.00133433	FGF19, NRP2, CTHRC1, FUT8, SOX1, WASF2, ITGA11, RPS6KB1, ITGB2, PAX3, CDH2, ITGB1, CD2AP, SHH, VCAM1, EDNRB, ATOH1, CXCR4, CTGF, ANG, PPAP2A, FGF2, S100A2, B4GALT1, LMX1B, ROCK1, PODXL, SIX4, ITGA4, MYH9, NTN1, SMO, HIST1H1T, ITGA6, ETS1, BAX, CXCL16, SIX1, LRP6, TGFBR3, LAMC1, PLAU	1113	307	13528	1.66284	0.992168	0.0402646	2.42557
GOTERM_BP_FAT	GO:0048870~cell motility	42	2.72197	0.00133433	FGF19, NRP2, CTHRC1, FUT8, SOX1, WASF2, ITGA11, RPS6KB1, ITGB2, PAX3, CDH2, ITGB1, CD2AP, SHH, VCAM1, EDNRB, ATOH1, CXCR4, CTGF, ANG, PPAP2A, FGF2, S100A2, B4GALT1, LMX1B, ROCK1, PODXL, SIX4, ITGA4, MYH9, NTN1, SMO, HIST1H1T, ITGA6, ETS1, BAX, CXCL16, SIX1, LRP6, TGFBR3, LAMC1, PLAU	1113	307	13528	1.66284	0.992168	0.0402646	2.42557
GOTERM_BP_FAT	GO:0006081~cellular aldehyde metabolic process	9	0.583279	0.0014233	ALDH1A1, ALDH7A1, GLO1, GRHPR, ADH5P4, ALDH3A2, ALDH9A1, ALDH3B1, TPI1P1	1113	28	13528	3.90682	0.994333	0.0425401	2.5853
GOTERM_BP_FAT	GO:0007346~regulation of mitotic cell cycle	25	1.62022	0.00142546	NEK2, STAT5A, PML, TTK, AFAP1L2, RPS27L, GTSE1, CDT1, CDKN2A, BUB1, FBXO5, TGFA, CDC6, CDK1, DLGAP5, NUSAP1, BIRC5, CENPE, GAS1, UBE2C, CCND1, MAD2L1, ZWINT, BTG3, KIF20B	1113	152	13528	1.9991	0.994377	0.042256	2.58918
GOTERM_BP_FAT	GO:0007229~integrin-mediated signaling pathway	15	0.972132	0.00145836	FUT8, ITGA11, ITGB4, ITGA2, ITGA10, ITGB2, ITGA4, MYH9, ITGB1, DOCK1, ITGA6, CTGF, ITGAD, ADAM8, ADAM9	1113	70	13528	2.60454	0.995012	0.0428611	2.64818
GOTERM_BP_FAT	GO:0034097~response to cytokine stimulus	16	1.03694	0.00173849	KYNU, SP100, MCL1, OSMR, SOCS3, SOCS1, PML, STAT1, STAT3, JUNB, CD38, CXCL16, CASP8, XCR1, PGGT1B, ADAM9	1113	79	13528	2.46168	0.9982	0.050482	3.14922
GOTERM_BP_FAT	GO:0034101~erythrocyte homeostasis	12	0.777706	0.00174513	DNASE2, BMP4, RPS19, LYN, HMOX1, HCLS1, SP3, HOXB6, SMAD5, IREB2, TGFBR3, TCEA1	1113	49	13528	2.97662	0.998242	0.0502684	3.16105
GOTERM_BP_FAT	GO:0048663~neuron fate commitment	11	0.712897	0.00174562	NOTCH3, BMP4, ISL2, ATOH1, FOXA2, FOXA1, SOX2, PAX3, GLI2, GLI3, SHH	1113	42	13528	3.18333	0.998246	0.0498872	3.16194
GOTERM_BP_FAT	GO:0009891~positive regulation of biosynthetic process	80	5.18471	0.00182707	ELF1, FOXK1, FOXA2, STAT5A, TLR3, TLR4, ZEB1, PAX3, GLI2, GLI3, TLR8, SHH, ATOH1, NOD2, S1PR1, GATA6, HMOX1, FOXF2, SERTAD3, PDGFC, SHC1, YAP1, FGF2, SP100, CD3E, MLXIPL, SIX4, IRS1, JUNB, AHR, TNKS2, MED7, CD86, NCOA3, SIX1, SMARCA1, TMX1, HMGB2, SOX2, KLRK1, AFAP1L2, EHF, ABCA1, CALR, TCF7L1, PLAGL1, HAND2, NPM1, TCEA1, CD4, NFATC2, ETV4, TLX1, ZNF423, KLF5, ZBTB7B, BMP4, SOAT1, YEATS4, LMX1B, …	1113	695	13528	1.39908	0.998696	0.051749	3.30714
GOTERM_BP_FAT	GO:0010557~positive regulation of macromolecule biosynthetic process	76	4.92547	0.00189236	ELF1, FOXK1, FOXA2, STAT5A, TLR3, TLR4, ZEB1, PAX3, GLI2, GLI3, TLR8, SHH, ATOH1, S1PR1, GATA6, HMOX1, FOXF2, SERTAD3, PDGFC, SHC1, YAP1, FGF2, SP100, CD3E, MLXIPL, SIX4, IRS1, JUNB, AHR, TNKS2, MED7, CD86, NCOA3, SIX1, SMARCA1, TMX1, HMGB2, SOX2, AFAP1L2, EHF, CALR, TCF7L1, PLAGL1, HAND2, TCEA1, CD4, NFATC2, ETV4, TLX1, ZNF423, KLF5, ZBTB7B, BMP4, SOAT1, YEATS4, LMX1B, IKZF1, MAML2, FOXA1, SMAD5…	1113	654	13528	1.41245	0.998971	0.053136	3.42339
GOTERM_BP_FAT	GO:0048762~mesenchymal cell differentiation	12	0.777706	0.00245211	NRP2, S100A4, FGF19, SMO, EDNRB, CYP26C1, HAND2, EOMES, TGFBR3, PAX3, BMP7, SHH	1113	51	13528	2.85989	0.999866	0.0678043	4.41456
GOTERM_BP_FAT	GO:0014031~mesenchymal cell development	12	0.777706	0.00245211	NRP2, S100A4, FGF19, SMO, EDNRB, CYP26C1, HAND2, EOMES, TGFBR3, PAX3, BMP7, SHH	1113	51	13528	2.85989	0.999866	0.0678043	4.41456
GOTERM_BP_FAT	GO:0001654~eye development	22	1.42579	0.00250072	BMP4, TWSG1, SOX1, IKZF1, LMX1B, SOX2, SIX5, ZEB1, GAS1, NHS, COL5A2, GLI3, STAT3, SHH, BAX, SP3, TGIF1, PYGO2, BMP7, BMPR1B, COL8A1, KLF4	1113	132	13528	2.02576	0.999888	0.0685816	4.50018
GOTERM_BP_FAT	GO:0032989~cellular component morphogenesis	50	3.24044	0.00257915	NRP2, S100A4, S100A6, GJA1, GLI2, TTN, SHH, ATOH1, CXCR4, COL4A3BP, POU4F3, ROBO3, CD3G, NKX2-8, OTX2, EOMES, MYH9, ECT2, VASP, SS18, NCAM2, SMO, KRT19, CLIC5, LAMC1, PARD3, CCDC99, PTK7, IL7R, ITGB1, ALCAM, EZR, KAL1, RUNX3, ETV4, NOX4, CASC5, GAS1, WWTR1, NTN1, ATP7A, SEMA6A, EPHA7, ISL2, DLX5, BAX, TGFBR3, ANTXR1, BMP7, BMPR1B	1113	397	13528	1.5308	0.999916	0.0701294	4.63818
GOTERM_BP_FAT	GO:0007076~mitotic chromosome condensation	6	0.388853	0.00273353	NCAPH, NUSAP1, TTN, CDCA5, SMC2, SMC4	1113	13	13528	5.60979	0.999952	0.0736241	4.90925
GOTERM_BP_FAT	GO:0030324~lung development	18	1.16656	0.00275775	BMP4, WNT5A, FOXA2, NKX2-8, FOXA1, TGFBR2, GLI2, GLI3, SHH, ATP7A, TIMELESS, CTGF, GATA6, SP3, LOX, FGF2, ADAMTS2, SIM2	1113	99	13528	2.20992	0.999956	0.073707	4.9517
GOTERM_BP_FAT	GO:0016481~negative regulation of transcription	56	3.62929	0.00287169	FOXK1, REST, PAX3, ZEB1, GLI2, ZNF254, GLI3, HEY2, FOXF2, ATP8B1, FGF2, GSC, SP100, RCOR2, MLXIPL, CSDA, SUZ12, HOXD8, TIMELESS, NAB1, TGIF1, PRDM1, C1D, BTAF1, HMGB2, MTDH, SNX6, SOX2, PML, CALR, TCF7L1, HEXIM1, SKIL, BHLHE40, ZNF423, SIM2, ENO1, MDFI, IKZF1, TBX2, FOXA1, ZNF24, WWTR1, SIRT1, BRCA1, STAT3, HOXB4, SALL4, NEDD4, IRF8, IRF2, RFX3, ID3, TBL1X, ZFHX3, KLF4	1113	459	13528	1.48291	0.999971	0.076079	5.15123
GOTERM_BP_FAT	GO:0060485~mesenchyme development	12	0.777706	0.0028837	NRP2, S100A4, FGF19, SMO, EDNRB, CYP26C1, HAND2, EOMES, TGFBR3, PAX3, BMP7, SHH	1113	52	13528	2.80489	0.999972	0.075833	5.17222
GOTERM_BP_FAT	GO:0007507~heart development	31	2.00907	0.00291274	FGF19, NRP2, GJA1, COL2A1, PAX3, TTN, GLI2, ITGB1, GLI3, SHH, GATA6, HEXIM1, HAND2, COL4A3BP, CASP7, CASP8, NFATC4, CALCRL, BMP4, TBX2, TGFBR2, FBN1, HSPG2, TEAD1, ITGA4, SMO, MIB1, SALL4, TGFBR3, ID3, POFUT1	1113	215	13528	1.75251	0.999975	0.0760189	5.22302
GOTERM_BP_FAT	GO:0007051~spindle organization	11	0.712897	0.00302165	KIF11, CEP120, ZWINT, CKS2, TTK, FBXO5, AURKA, MYH9, UBE2C, TACC3, SMC3	1113	45	13528	2.97111	0.999983	0.0781903	5.4132
GOTERM_BP_FAT	GO:0008285~negative regulation of cell proliferation	46	2.98121	0.0031817	RARRES3, IFITM1, E2F7, PML, IFI30, GJA1, ZEB1, IL15, GLI3, SHH, WARS, CDKN2A, ANG, HMOX1, NPM1, INPP5D, PPAP2A, GPNMB, FGF2, RUNX3, PINX1, B4GALT1, NOX4, BMP4, CDC6, TGFBR2, NKX2-8, S100A11, CDK6, SIX5, TNFRSF14, IDO1, GAS1, CD164, NOTCH2, PPM1D, BTG2, ETS1, BAX, BTG3, TGIF1, TGFBR3, BMP7, KLF4, TOB1, F2R	1113	361	13528	1.54878	0.999991	0.0815846	5.69205
GOTERM_BP_FAT	GO:0046637~regulation of alpha-beta T cell differentiation	8	0.518471	0.00319754	CD83, CD86, IKZF1, TGFBR2, ZAP70, IL2RG, IRF4, SHH	1113	25	13528	3.88945	0.999991	0.081401	5.71961
GOTERM_BP_FAT	GO:0045058~T cell selection	7	0.453662	0.00324344	PTPRC, CD3D, CD3E, ZAP70, CD4, IL15, CD74	1113	19	13528	4.47799	0.999992	0.0819489	5.79942
GOTERM_BP_FAT	GO:0030099~myeloid cell differentiation	17	1.10175	0.00355274	BMP4, LYN, HCLS1, SMAD5, TGFBR2, PML, PRDX3, MYH9, DNASE2, RPS19, HOXB7, SP3, IRF8, CASP8, TGFBR3, TCEA1, IRF4	1113	93	13528	2.2218	0.999998	0.0888034	6.33553
GOTERM_BP_FAT	GO:0042475~odontogenesis of dentine-containing tooth	10	0.648088	0.0036801	BMP4, SMO, ITGA6, BAX, CA2, GLI2, BMP7, GLI3, SHH, EDARADD	1113	39	13528	3.11655	0.999998	0.0912166	6.55545
GOTERM_BP_FAT	GO:0007259~JAK-STAT cascade	10	0.648088	0.0036801	NMI, PRLR, SOCS3, CLCF1, STAT5A, SOCS1, SOCS6, STAT1, STAT3, F2R	1113	39	13528	3.11655	0.999998	0.0912166	6.55545
GOTERM_BP_FAT	GO:0031399~regulation of protein modification process	39	2.52754	0.00368679	PML, TTK, CTCFL, MAP4K1, TLR4, ITGB2, EDNRB, NOD2, CDKN2A, CLCF1, FBXO5, CD4, PDGFC, PDGFD, CD6, FGF2, FGD4, MDFI, BMP4, IBTK, CDK1, PTPRC, LYN, CD3E, SOCS3, HCLS1, SOCS1, TNFRSF14, CDC20, UBE2C, BRCA1, CCNB1, CCND1, MAD2L1, PSME1, CCND3, BAX, HIPK3, BMP7	1113	295	13528	1.60687	0.999999	0.0907571	6.56698
GOTERM_BP_FAT	GO:0016337~cell-cell adhesion	37	2.39793	0.00379013	CLDN17, PARD3, MPZL2, PCDHB14, COL2A1, ITGB2, CDH2, PCDHB11, PCDHB10, ITGB1, CD2AP, VCAM1, EZR, CTGF, CD2, ADAM8, ADAM9, PTPRC, ROCK1, PCDHB5, PCDHB3, STXBP3, ITGA4, CELSR1, MYH9, CD164, PCDH18, CD84, SIGLEC1, NCAM2, AMIGO2, DSG2, FREM2, CD58, DSC2, ITGAD, BMPR1B	1113	276	13528	1.62941	0.999999	0.0925585	6.74505
GOTERM_BP_FAT	GO:0030323~respiratory tube development	18	1.16656	0.00379902	BMP4, WNT5A, FOXA2, NKX2-8, FOXA1, TGFBR2, GLI2, GLI3, SHH, ATP7A, TIMELESS, CTGF, GATA6, SP3, LOX, FGF2, ADAMTS2, SIM2	1113	102	13528	2.14492	0.999999	0.0921476	6.76034
GOTERM_BP_FAT	GO:0030855~epithelial cell differentiation	22	1.42579	0.00393702	B4GALT1, LCE4A, FOXA2, FOXA1, PTK7, ANXA1, EHF, FZD2, JAG1, EZR, S1PR1, GATA6, PPL, DLX5, UPK1B, SIX1, ID3, CSTA, BMP7, VEZF1, EMP1, ADAM9	1113	137	13528	1.95182	0.999999	0.0947068	6.99759
GOTERM_BP_FAT	GO:0046635~positive regulation of alpha-beta T cell activation	8	0.518471	0.00407005	CD83, PTPRC, CD86, IKZF1, CD3E, TGFBR2, ZAP70, IL2RG	1113	26	13528	3.73986	1	0.097111	7.22574
GOTERM_BP_FAT	GO:0050691~regulation of defense response to virus by host	5	0.324044	0.00408681	DDX58, PML, APOBEC3G, IL15, APOBEC3F	1113	9	13528	6.75252	1	0.0968573	7.25445
GOTERM_BP_FAT	GO:0007164~establishment of tissue polarity	5	0.324044	0.00408681	FOXF2, FZD3, FZD2, CELSR1, FZD5	1113	9	13528	6.75252	1	0.0968573	7.25445
GOTERM_BP_FAT	GO:0000902~cell morphogenesis	45	2.9164	0.00412953	NRP2, S100A4, CCDC99, PARD3, S100A6, PTK7, GJA1, IL7R, GLI2, SHH, ALCAM, ATOH1, EZR, CXCR4, KAL1, COL4A3BP, POU4F3, ROBO3, ETV4, RUNX3, NOX4, CD3G, OTX2, NKX2-8, EOMES, GAS1, MYH9, WWTR1, NTN1, ECT2, VASP, ATP7A, SMO, NCAM2, SS18, SEMA6A, ISL2, EPHA7, DLX5, CLIC5, TGFBR3, ANTXR1, LAMC1, BMPR1B, BMP7	1113	356	13528	1.53639	1	0.0971886	7.32759
GOTERM_BP_FAT	GO:0010627~regulation of protein kinase cascade	34	2.2035	0.00424129	FGF19, SLC44A2, LITAF, TSPAN6, TLR3, GJA1, MAP4K1, TLR4, LPAR1, TMED7, NOD2, MIER1, CLCF1, HMOX1, CASP8, TICAM2, RHOC, FGD4, RHOH, MDFI, SECTM1, PTPRC, CARD8, BST2, LYN, LGALS1, HCLS1, SOCS1, EDA2R, ECT2, LGALS9, TNFSF10, NEDD4, HIPK3, F2R	1113	249	13528	1.65966	1	0.0990494	7.51865
GOTERM_BP_FAT	GO:0045087~innate immune response	22	1.42579	0.00429419	IFIH1, KYNU, SP100, TLR3, NLRX1, TLR4, SERPING1, C1R, APOBEC3G, SLAMF7, APOBEC3F, C1QC, TLR8, DDX58, C1QA, TMED7, C1QB, NOD2, APOL1, CXCL16, TICAM2, C1RL, DHX58	1113	138	13528	1.93768	1	0.0995854	7.60897
GOTERM_BP_FAT	GO:0009968~negative regulation of signal transduction	31	2.00907	0.00438988	TWSG1, ELF1, SNX6, SOX2, CALR, NOD2, HEY2, INPP5D, SKIL, SOX17, RHOH, MDFI, PTPRC, CARD8, PRAME, GSC, SOCS3, CD3E, SOCS1, SOCS6, SOCS4, GAS1, SIRT1, IRS1, DKK2, CCND1, RGS1, CYP26C1, LRP6, TGIF1, TOB1	1113	221	13528	1.70494	1	0.10105	7.77212
GOTERM_BP_FAT	GO:0032526~response to retinoic acid	9	0.583279	0.00440186	BMP4, CD38, SP100, SOX2, IGFBP2, AQP3, SHH, KLF4, MEST	1113	33	13528	3.31487	1	0.100676	7.79253
GOTERM_BP_FAT	GO:0051101~regulation of DNA binding	20	1.29618	0.00453625	MDFI, SP100, MTDH, TLR3, ITGA2, EDA2R, TLR4, PRDX3, SIRT1, SHH, RPS3, SMO, NOD2, CDKN2A, NCOA3, HMOX1, NPM1, TGFBR3, ID3, IRF4	1113	121	13528	2.00901	1	0.102946	8.02115
GOTERM_BP_FAT	GO:0030030~cell projection organization	46	2.98121	0.00456069	NRP2, FGFR1, PARD3, S100A6, WASF2, ITGB4, GJA1, LPAR1, GLI2, CD2AP, SHH, VCL, ALCAM, ATOH1, CXCR4, TTC30A, TTC30B, KAL1, POU4F3, ROBO3, ETV4, RUNX3, FGD4, KLF5, ROCK1, OTX2, NKX2-8, GAS1, MYH9, WWTR1, NTN1, VASP, ATP7A, SMO, NCAM2, SEMA6A, ISL2, EPHA7, ITGA6, NEDD4, DLX5, CLIC5, PHGDH, BMPR1B, BMP7, IGSF9	1113	368	13528	1.51932	1	0.102832	8.06266
GOTERM_BP_FAT	GO:0048589~developmental growth	16	1.03694	0.00458193	BMP4, NINJ1, GAS1, GLI2, TIMP3, GLI3, SHH, CCNB1, NOTCH3, NOTCH2, SMO, GSN, POU4F3, PYGO2, BMPR1B, PLAU	1113	87	13528	2.23532	1	0.102651	8.09873
GOTERM_BP_FAT	GO:0002230~positive regulation of defense response to virus by host	4	0.259235	0.00488125	DDX58, PML, APOBEC3G, APOBEC3F	1113	5	13528	9.72363	1	0.10833	8.60561
GOTERM_BP_FAT	GO:0007243~protein kinase cascade	46	2.98121	0.00503605	WNT5A, FGFR1, NMI, STAT5A, STK17B, PRDX4, TLR3, MAP4K1, RPS6KB1, TLR4, LPAR1, CD74, LATS2, TLR8, IRAK4, TMED7, CXCR4, CLCF1, HMOX1, ZAP70, TICAM2, TNFRSF19, TGFA, SHC1, SPRED1, FGF2, EDARADD, ADAM9, FGD4, MDFI, FYB, PTPRC, SOCS3, SOCS1, MLXIPL, SOCS6, STAT1, IRS1, STK3, STAT3, TNFRSF10A, SS18, PRLR, LAX1, TGFBR3, TRIP6, F2R	1113	370	13528	1.5111	1	0.1109	8.86672
GOTERM_BP_FAT	GO:0007584~response to nutrient	22	1.42579	0.0050895	BMP4, KYNU, SP100, SOX2, BCKDHB, TGFBR2, ITGA2, RPS6KB1, CLIC1, STAT1, TIMP3, SHH, AQP3, CD38, CCND1, GSN, HMOX1, DDAH2, IGFBP2, BMP7, KLF4, MEST	1113	140	13528	1.91	1	0.111339	8.95671
GOTERM_BP_FAT	GO:0009612~response to mechanical stimulus	12	0.777706	0.00525819	BMP4, SLC12A2, BTG2, SOX2, TGFBR2, TRPV4, ITGA2, RPS6KB1, IGFBP2, STAT1, TIMP3, JUNB	1113	56	13528	2.60454	1	0.114135	9.24016
GOTERM_BP_FAT	GO:0051052~regulation of DNA metabolic process	19	1.23137	0.00532099	PTPRC, CDC6, MSH2, USP1, PIF1, GMNN, S100A11, GLI2, CALR, IL7R, BRCA1, RPS3, CDT1, TNKS2, CDC45, PCNA, SHC1, PDGFC, ID3	1113	114	13528	2.02576	1	0.114737	9.34548
GOTERM_BP_FAT	GO:0033554~cellular response to stress	65	4.21257	0.00537179	NUAK2, ZMAT3, RPS27L, PTTG1, PRDX3, GTSE1, RPS3, INSIG2, FANCI, AEN, HMOX1, COL4A3BP, TRPV4, TOP2A, ESCO1, CDK1, SP100, LYN, USP1, CCDC47, EEPD1, RBBP8, SMO, EYA4, RECQL, CCND1, UHRF1, EYA2, BTG2, TIMELESS, DDB2, CTSD, WNT5A, HMGB2, NEK1, MGMT, SHFM1, PML, MAP4K1, RRM2B, OBFC2A, TYMS, TFEC, TNFRSF19, HSPA5, ERO1L, MYOF, FGD4, EXO1, MDFI, RAD51AP1, MSH2, SMC5, BRIP1, SIRT1, SMC3, BRCA1, ATP7A, POL…	1113	566	13528	1.39584	1	0.115089	9.43058
GOTERM_BP_FAT	GO:0010629~negative regulation of gene expression	59	3.82372	0.00540554	FOXK1, BNIP3, REST, PAX3, ZEB1, GLI2, ZNF254, GLI3, HEY2, FOXF2, ATP8B1, FGF2, GSC, SP100, RCOR2, MLXIPL, CSDA, SUZ12, HOXD8, TIMELESS, NAB1, TGIF1, PRDM1, C1D, BTAF1, HMGB2, MTDH, SNX6, SOX2, PML, CALR, TCF7L1, HEXIM1, SKIL, BHLHE40, ZNF423, SIM2, ENO1, MDFI, BMP4, IKZF1, TBX2, FOXA1, ZNF24, WWTR1, SIRT1, STAT3, BRCA1, HOXB4, SALL4, NEDD4, BAX, IRF8, IRF2, RFX3, ID3, TBL1X, ZFHX3, KLF4	1113	504	13528	1.42285	1	0.115095	9.48709
GOTERM_BP_FAT	GO:0051303~establishment of chromosome localization	6	0.388853	0.00555252	CCDC99, DLGAP5, BIRC5, CENPE, CDCA5, PINX1	1113	15	13528	4.86181	1	0.117356	9.73275
GOTERM_BP_FAT	GO:0048665~neuron fate specification	6	0.388853	0.00555252	ATOH1, FOXA2, FOXA1, GLI2, GLI3, SHH	1113	15	13528	4.86181	1	0.117356	9.73275
GOTERM_BP_FAT	GO:0050000~chromosome localization	6	0.388853	0.00555252	CCDC99, DLGAP5, BIRC5, CENPE, CDCA5, PINX1	1113	15	13528	4.86181	1	0.117356	9.73275
GOTERM_BP_FAT	GO:0021532~neural tube patterning	7	0.453662	0.00562808	BMP4, SMO, GSC, FOXA2, GAS1, GLI2, SHH	1113	21	13528	4.05151	1	0.118174	9.85879
GOTERM_BP_FAT	GO:0031667~response to nutrient levels	28	1.81465	0.00585062	KYNU, NUAK2, SOX2, RPS6KB1, TIMP3, SHH, AQP3, GSN, HMOX1, HSPA5, DDAH2, MEST, BMP4, NES, SP100, SOCS3, TGFBR2, BCKDHB, ITGA2, CLIC1, STAT1, SIRT1, CD38, CCND1, CTSD, BMP7, IGFBP2, KLF4	1113	197	13528	1.72755	1	0.121861	10.2291
GOTERM_BP_FAT	GO:0003002~regionalization	28	1.81465	0.00585062	FOXA2, GLI2, GLI3, SHH, TCF7L1, HOXA3, HOXA4, HOXA6, BMP4, MDFI, GSC, LMX1B, GAS1, HOXB3, HOXB4, MIB1, SMO, HOXD8, CYP26C1, HOXB7, BTG2, HOXB8, HOXB6, LRP6, TGIF1, BMPR1B, PBX3, POFUT1	1113	197	13528	1.72755	1	0.121861	10.2291
GOTERM_BP_FAT	GO:0010628~positive regulation of gene expression	66	4.27738	0.00639192	ELF1, FOXA2, FOXK1, STAT5A, PAX3, ZEB1, GLI2, GLI3, SHH, ATOH1, S1PR1, GATA6, FOXF2, SERTAD3, YAP1, FGF2, SP100, MLXIPL, SIX4, JUNB, AHR, MED7, CD86, NCOA3, SIX1, PRDM1, SMARCA1, TMX1, HMGB2, SOX2, CTCFL, AFAP1L2, EHF, TCF7L1, PLAGL1, HAND2, TCEA1, NFATC2, ETV4, TLX1, ZNF423, ZBTB7B, BMP4, KLF5, YEATS4, IL2RB, LMX1B, IKZF1, FOXA1, MAML2, SMAD5, TEAD1, CREB5, WWTR1, CENPK, STAT3, BRCA1, SALL4, ETS…	1113	581	13528	1.38072	1	0.131642	11.1237
GOTERM_BP_FAT	GO:0006954~inflammatory response	41	2.65716	0.00647125	NMI, CCR1, TLR3, AFAP1L2, TLR4, ITGB2, C1R, IL15, C1QC, TLR8, CXCL10, CD97, TMED7, CXCR4, HMOX1, TICAM2, NFATC4, REG3G, XCR1, B4GALT1, NOX4, LYN, LYZ, EPHX2, ANXA1, SERPING1, IDO1, CDO1, STAT3, CD163, C1QA, APOL2, SIGLEC1, C1QB, CCR5, CCR3, AOX1, C1RL, PARP4, BMPR1B, PLA2G2D, F2R	1113	325	13528	1.53334	1	0.13242	11.2541
GOTERM_BP_FAT	GO:0042035~regulation of cytokine biosynthetic process	14	0.907323	0.00682445	CD3E, STAT5A, TLR3, IGF2BP2, TLR4, TLR8, INHBB, CD86, HMOX1, IRF1, CD4, IRF4, INPP5D, LAG3	1113	74	13528	2.29951	1	0.138371	11.8325
GOTERM_BP_FAT	GO:0006323~DNA packaging	19	1.23137	0.00699354	HIST1H2AC, HIST1H3J, HMGB2, HIST1H2BD, HIST1H1C, HIST1H2AE, NUSAP1, TTN, SMC2, SMC4, NCAPH, HIST1H1T, HIST1H2BK, HJURP, NPM1, HIST1H2AM, ASF1B, HIST1H3F, CDCA5, TOP2A, HIST1H3G	1113	117	13528	1.97381	1	0.140775	12.1082
GOTERM_BP_FAT	GO:0001817~regulation of cytokine production	26	1.68503	0.00707767	ELF1, STAT5A, KLRK1, TLR3, IGF2BP2, TLR4, AFAP1L2, TLR8, TMED7, NOD2, HMOX1, TICAM2, CD4, INPP5D, AGPAT2, LAG3, SRGN, CARD8, CD3E, IDO1, INHBB, DDX58, CD83, CD86, IRF1, IRF4, F2R	1113	181	13528	1.74596	1	0.141568	12.245
GOTERM_BP_FAT	GO:0048732~gland development	21	1.36099	0.00707862	B4GALT1, BMP4, IKZF1, TBX2, STAT5A, SOX2, FOXA1, HK2, ITGA2, GLI2, CDO1, NTN1, GLI3, IRS1, MDK, SHH, HOXB3, HOXA3, PRLR, SIX1, BMP7	1113	135	13528	1.89071	1	0.140814	12.2465
GOTERM_BP_FAT	GO:0007093~mitotic cell cycle checkpoint	10	0.648088	0.00728342	CDK1, CCND1, MAD2L1, ZWINT, PML, BUB1, TTK, RPS27L, CENPE, GTSE1	1113	43	13528	2.82664	1	0.143811	12.5788
GOTERM_BP_FAT	GO:0042060~wound healing	27	1.74984	0.00737342	PLDN, FOXA2, F13A1, NINJ1, LMAN1, TIMP3, SHH, GSN, HMOX1, LOX, FGF2, ENTPD2, B4GALT1, TGFBR2, ITGA2, STXBP3, SERPING1, NOTCH3, CCNB1, VWF, NOTCH2, SDC1, THBD, TFPI, PROS1, PLAU, F2R	1113	191	13528	1.71818	1	0.144677	12.7244
GOTERM_BP_FAT	GO:0050778~positive regulation of immune response	22	1.42579	0.00762135	PTPRC, LYN, CD3E, STAT5A, KLRK1, TLR3, SERPING1, C1R, TLR4, IDO1, IL15, C1QC, TLR8, B2M, C1QA, C1QB, NOD2, LAX1, C1RL, ZAP70, LAG3, HLA-DRA	1113	145	13528	1.84414	1	0.148382	13.1244
GOTERM_BP_FAT	GO:0048545~response to steroid hormone stimulus	27	1.74984	0.00788281	HMGB2, AURKA, RPS6KB1, TIMP3, SHH, HMOX1, LOX, ADAM9, BMP4, PNLIPRP1, SOCS3, TGFBR2, SOCS1, BCKDHB, CDO1, STAT3, JUNB, BRCA1, CD38, C1QB, SDC1, CCND1, KRT19, CA4, CA2, BMP7, IGFBP2	1113	192	13528	1.70923	1	0.152271	13.5444
GOTERM_BP_FAT	GO:0040007~growth	26	1.68503	0.00812075	FGFR1, NINJ1, GLI2, IL7R, CCNG1, GLI3, TIMP3, SHH, GSN, NPM1, POU4F3, SEPP1, BMP4, LMX1B, GAS1, INHBB, NOTCH3, CCNB1, SMO, NOTCH2, PYGO2, TGFBR3, BMP7, BMPR1B, EMP1, PLAU	1113	183	13528	1.72687	1	0.155684	13.9249
GOTERM_BP_FAT	GO:0042113~B cell activation	14	0.907323	0.0085553	EXO1, PTPRC, BST2, IKZF1, MSH2, SWAP70, ITGA4, IL7R, ITGB1, VCAM1, CLCF1, LAX1, BAX, SP3	1113	76	13528	2.23899	1	0.16248	14.6158
GOTERM_BP_FAT	GO:0050730~regulation of peptidyl-tyrosine phosphorylation	13	0.842515	0.00882894	PTPRC, LYN, CD3E, HCLS1, SOCS1, TNFRSF14, TLR4, ITGB2, NOD2, CLCF1, PDGFC, CD4, PDGFD	1113	68	13528	2.32366	1	0.166376	15.0481
GOTERM_BP_FAT	GO:0031570~DNA integrity checkpoint	11	0.712897	0.0088842	CDK1, CDC6, CCND1, CDC45, MSH2, PML, BRIP1, RPS27L, GTSE1, BRCA1, CDT1	1113	52	13528	2.57115	1	0.166472	15.1352
GOTERM_BP_FAT	GO:0010212~response to ionizing radiation	12	0.777706	0.00896137	PTPRC, CCND1, NES, THBD, SOCS3, MSH2, BAX, AEN, NEK1, PML, OBFC2A, BRCA1	1113	60	13528	2.43091	1	0.166941	15.2566
GOTERM_BP_FAT	GO:0009953~dorsal/ventral pattern formation	12	0.777706	0.00896137	MDFI, BMP4, SMO, GSC, LMX1B, FOXA2, TGIF1, GAS1, GLI2, BMPR1B, GLI3, SHH	1113	60	13528	2.43091	1	0.166941	15.2566
GOTERM_BP_FAT	GO:0001667~ameboidal cell migration	9	0.583279	0.00913723	NRP2, FGF19, SMO, EDNRB, CXCR4, WASF2, LRP6, PAX3, SHH	1113	37	13528	2.95651	1	0.169076	15.5327
GOTERM_BP_FAT	GO:0006974~response to DNA damage stimulus	45	2.9164	0.00937661	HMGB2, ZMAT3, NEK1, MGMT, SHFM1, PML, RPS27L, RRM2B, PTTG1, OBFC2A, GTSE1, RPS3, TYMS, FANCI, HMOX1, AEN, TOP2A, EXO1, ESCO1, CDK1, RAD51AP1, SP100, LYN, MSH2, USP1, SMC5, BRIP1, SIRT1, BRCA1, EEPD1, SMC3, RBBP8, RECQL, EYA4, POLD4, UHRF1, CCND1, EYA2, BTG2, TIMELESS, BAX, DDB2, PCNA, CUL4B, PARP4	1113	373	13528	1.46637	1	0.172248	15.9072
GOTERM_BP_FAT	GO:0045935~positive regulation of nucleobase, nucleoside, nucleotide and nucleic acid metabolic process	69	4.47181	0.00968995	ELF1, FOXK1, FOXA2, STAT5A, PAX3, ZEB1, GLI2, GLI3, SHH, ATOH1, S1PR1, GATA6, FOXF2, SERTAD3, SHC1, PDGFC, YAP1, FGF2, SP100, MLXIPL, SIX4, JUNB, AHR, TNKS2, MED7, CD86, NCOA3, SIX1, SMARCA1, TMX1, HMGB2, SOX2, AFAP1L2, EHF, ABCA1, CALR, TCF7L1, PLAGL1, HAND2, TCEA1, NFATC2, ETV4, TLX1, ZNF423, KLF5, ZBTB7B, BMP4, PTPRC, YEATS4, LMX1B, IKZF1, MAML2, FOXA1, SMAD5, TEAD1, CREB5, WWTR1, CENPK, STAT3…	1113	624	13528	1.34401	1	0.176602	16.395
GOTERM_BP_FAT	GO:0045893~positive regulation of transcription, DNA-dependent	55	3.56448	0.00977462	ELF1, FOXA2, FOXK1, STAT5A, PAX3, ZEB1, GLI2, SHH, ATOH1, S1PR1, GATA6, FOXF2, YAP1, FGF2, SP100, MLXIPL, SIX4, JUNB, AHR, NCOA3, SIX1, SMARCA1, TMX1, HMGB2, SOX2, AFAP1L2, EHF, TCF7L1, PLAGL1, HAND2, TCEA1, NFATC2, TLX1, ZBTB7B, BMP4, YEATS4, LMX1B, IKZF1, FOXA1, MAML2, SMAD5, TEAD1, CREB5, CENPK, WWTR1, BRCA1, STAT3, SALL4, ETS1, IRF1, IRF4, BMP7, TBL1X, KLF4, F2R	1113	477	13528	1.40147	1	0.177125	16.5264
GOTERM_BP_FAT	GO:0010033~response to organic substance	78	5.05509	0.00994535	KYNU, OSMR, STAT5A, TLR3, RPS6KB1, AURKA, DEK, TLR4, PRDX3, LATS2, SHH, B2M, NOD2, ANG, GSN, HMOX1, CASP8, CREB3L2, VPS4B, SHC1, LOX, DNAJC3, DDAH2, XCR1, ADAM9, SP100, LYN, SOCS3, SOCS1, CLIC1, CDO1, IRS1, JUNB, CD38, CD83, C1QB, KRT19, CCND1, SDC1, THBD, BTG2, CA4, CTSC, CA2, STEAP2, PRF1, HMGB2, MCL1, PML, GNG11, TIMP3, SERPINH1, PHIP, CD4, ERO1L, PIK3R3, PGGT1B, BMP4, PNLIPRP1, MSH2, HCLS1, B…	1113	721	13528	1.31492	1	0.179052	16.7907
GOTERM_BP_FAT	GO:0000904~cell morphogenesis involved in differentiation	32	2.07388	0.00995503	S100A4, NRP2, PARD3, S100A6, GLI2, SHH, ALCAM, ATOH1, CXCR4, KAL1, POU4F3, ROBO3, ETV4, RUNX3, NKX2-8, OTX2, EOMES, GAS1, MYH9, NTN1, VASP, SEMA6A, NCAM2, EPHA7, ISL2, CLIC5, DLX5, TGFBR3, ANTXR1, LAMC1, BMPR1B, BMP7	1113	244	13528	1.59404	1	0.178334	16.8056
GOTERM_BP_FAT	GO:0052547~regulation of peptidase activity	15	0.972132	0.0100555	CARD8, MGMT, PML, BIRC5, BCL2L13, STAT1, RPS3, TNFRSF10A, CDKN2A, BAX, LCK, CSTA, HSPA5, IFI6, F2R	1113	86	13528	2.11998	1	0.179094	16.9608
GOTERM_BP_FAT	GO:0006968~cellular defense response	12	0.777706	0.0101436	LSP1, KLRC4, ITK, PRF1, LGALS3BP, TRAC, CCR5, CCR3, GNLY, VEZF1, ITGB1, TRAT1	1113	61	13528	2.39106	1	0.179647	17.0966
GOTERM_BP_FAT	GO:0030182~neuron differentiation	51	3.30525	0.0107103	NRP2, S100A6, FOXA2, GJA1, JAG1, PAX3, GLI2, GLI3, SHH, ATOH1, S1PR1, CXCR4, POU4F3, ROBO3, NKX2-8, OTX2, PIGT, VASP, NCAM2, SMO, BTG2, CLIC5, SMARCA1, IGSF9, FGFR1, PARD3, SOX1, SOX2, ALCAM, KAL1, ETV4, TLX1, RUNX3, BMP4, LMX1B, FOXA1, GAS1, NTN1, STAT3, NOTCH3, ATP7A, SEMA6A, EPHA7, ISL2, NEDD4, DLX5, PHGDH, ID3, BMP7, PBX3, BMPR1B	1113	438	13528	1.41525	1	0.187817	17.965
GOTERM_BP_FAT	GO:0045941~positive regulation of transcription	63	4.08296	0.0108741	ELF1, FOXA2, FOXK1, STAT5A, PAX3, ZEB1, GLI2, GLI3, SHH, ATOH1, S1PR1, GATA6, FOXF2, SERTAD3, YAP1, FGF2, SP100, MLXIPL, SIX4, JUNB, AHR, MED7, CD86, NCOA3, SIX1, SMARCA1, TMX1, HMGB2, SOX2, AFAP1L2, EHF, TCF7L1, PLAGL1, HAND2, TCEA1, NFATC2, ETV4, TLX1, ZNF423, ZBTB7B, BMP4, KLF5, YEATS4, LMX1B, IKZF1, FOXA1, MAML2, SMAD5, TEAD1, CREB5, WWTR1, CENPK, STAT3, BRCA1, SALL4, ETS1, IRF1, EAF2, IRF4, …	1113	564	13528	1.35769	1	0.189507	18.2146
GOTERM_BP_FAT	GO:0043388~positive regulation of DNA binding	13	0.842515	0.0110934	MTDH, SP100, ITGA2, EDA2R, TLR3, TLR4, PRDX3, SHH, NOD2, NCOA3, NPM1, TGFBR3, IRF4	1113	70	13528	2.25727	1	0.192042	18.5473
GOTERM_BP_FAT	GO:0000122~negative regulation of transcription from RNA polymerase II promoter	34	2.2035	0.0112808	MTDH, SOX2, ZEB1, PAX3, GLI2, CALR, ZNF254, HEXIM1, HEY2, SKIL, ENO1, SIM2, MDFI, SP100, GSC, IKZF1, TBX2, FOXA1, MLXIPL, CSDA, WWTR1, STAT3, SUZ12, HOXB4, HOXD8, SALL4, NEDD4, IRF8, TGIF1, IRF2, ID3, PRDM1, TBL1X, ZFHX3	1113	266	13528	1.55359	1	0.194048	18.8306
GOTERM_BP_FAT	GO:0001101~response to acid	7	0.453662	0.0112933	LYN, GSN, MSH2, BAX, RPS6KB1, CDO1, TIMP3	1113	24	13528	3.54507	1	0.193335	18.8496
GOTERM_BP_FAT	GO:0045666~positive regulation of neuron differentiation	7	0.453662	0.0112933	ATOH1, FOXA2, FOXA1, SOX2, TGIF1, GLI2, SHH	1113	24	13528	3.54507	1	0.193335	18.8496
GOTERM_BP_FAT	GO:0043900~regulation of multi-organism process	8	0.518471	0.0113493	DDX58, NOD2, CD8B, PML, APOBEC3G, IL15, APOBEC3F, SHH	1113	31	13528	3.13665	1	0.193297	18.934
GOTERM_BP_FAT	GO:0051254~positive regulation of RNA metabolic process	55	3.56448	0.0114061	ELF1, FOXA2, FOXK1, STAT5A, PAX3, ZEB1, GLI2, SHH, ATOH1, S1PR1, GATA6, FOXF2, YAP1, FGF2, SP100, MLXIPL, SIX4, JUNB, AHR, NCOA3, SIX1, SMARCA1, TMX1, HMGB2, SOX2, AFAP1L2, EHF, TCF7L1, PLAGL1, HAND2, TCEA1, NFATC2, TLX1, ZBTB7B, BMP4, YEATS4, LMX1B, IKZF1, FOXA1, MAML2, SMAD5, TEAD1, CREB5, CENPK, WWTR1, BRCA1, STAT3, SALL4, ETS1, IRF1, IRF4, BMP7, TBL1X, KLF4, F2R	1113	481	13528	1.38981	1	0.193271	19.0196
GOTERM_BP_FAT	GO:0006275~regulation of DNA replication	12	0.777706	0.0114421	CDC6, CDC45, GMNN, S100A11, PCNA, PDGFC, SHC1, ID3, GLI2, CALR, TNKS2, CDT1	1113	62	13528	2.35249	1	0.19293	19.0738
GOTERM_BP_FAT	GO:0042476~odontogenesis	11	0.712897	0.0115828	BMP4, SMO, SDC1, ITGA6, BAX, CA2, GLI2, BMP7, GLI3, SHH, EDARADD	1113	54	13528	2.47592	1	0.194175	19.2854
GOTERM_BP_FAT	GO:0060348~bone development	19	1.23137	0.0116099	BMP4, TWSG1, SMAD5, HSPG2, COL2A1, SPARC, WWTR1, GLI2, COL5A2, SHH, HOXB4, SMO, CHRDL2, CTGF, KAZALD1, SP3, NAB1, GPNMB, BMP7	1113	123	13528	1.87753	1	0.193699	19.3261
GOTERM_BP_FAT	GO:0043281~regulation of caspase activity	14	0.907323	0.0117772	CARD8, MGMT, PML, BIRC5, BCL2L13, STAT1, RPS3, TNFRSF10A, CDKN2A, BAX, LCK, HSPA5, IFI6, F2R	1113	79	13528	2.15397	1	0.195324	19.5768
GOTERM_BP_FAT	GO:0050678~regulation of epithelial cell proliferation	13	0.842515	0.0123815	B4GALT1, NKX2-8, CDK6, GAS1, EDNRB, BAX, DLX5, GRN, TGFA, TGFBR3, LAMC1, FGF2, RUNX3	1113	71	13528	2.22548	1	0.203388	20.4764
GOTERM_BP_FAT	GO:0010648~negative regulation of cell communication	32	2.07388	0.0124217	TWSG1, ELF1, SNX6, SOX2, CALR, NOD2, HEY2, INPP5D, SKIL, SOX17, RHOH, MDFI, PTPRC, CARD8, PRAME, GSC, SOCS3, CD3E, SOCS1, SOCS6, SOCS4, GAS1, SIRT1, IRS1, DKK2, CD38, CCND1, RGS1, CYP26C1, LRP6, TGIF1, TOB1	1113	248	13528	1.56833	1	0.203072	20.536
GOTERM_BP_FAT	GO:0042327~positive regulation of phosphorylation	16	1.03694	0.0125173	BMP4, LYN, CD3E, HCLS1, TTK, TNFRSF14, TLR4, EDNRB, NOD2, CCND1, CCND3, ANG, CLCF1, CD4, BMP7, FGF2	1113	97	13528	2.00487	1	0.203565	20.6773
GOTERM_BP_FAT	GO:0021510~spinal cord development	9	0.583279	0.012588	SMO, ISL2, HOXB8, PHGDH, PAX3, GLI2, PBX3, GLI3, SHH	1113	39	13528	2.80489	1	0.203694	20.7817
GOTERM_BP_FAT	GO:0001503~ossification	18	1.16656	0.0126577	BMP4, TWSG1, SMAD5, HSPG2, COL2A1, SPARC, WWTR1, GLI2, COL5A2, SHH, SMO, CHRDL2, CTGF, KAZALD1, SP3, NAB1, GPNMB, BMP7	1113	115	13528	1.90245	1	0.203806	20.8845
GOTERM_BP_FAT	GO:0010464~regulation of mesenchymal cell proliferation	6	0.388853	0.0128841	TGFBR2, PRRX1, ZEB1, GAS1, IRS1, SHH	1113	18	13528	4.05151	1	0.206163	21.2174
GOTERM_BP_FAT	GO:0051173~positive regulation of nitrogen compound metabolic process	70	4.53662	0.0131199	ELF1, FOXK1, FOXA2, STAT5A, PAX3, ZEB1, GLI2, GLI3, SHH, ATOH1, S1PR1, GATA6, FOXF2, SERTAD3, PDGFC, SHC1, YAP1, FGF2, SP100, MLXIPL, SIX4, JUNB, AHR, TNKS2, MED7, CD86, NCOA3, SIX1, SMARCA1, TMX1, HMGB2, SOX2, KLRK1, AFAP1L2, EHF, ABCA1, CALR, TCF7L1, PLAGL1, HAND2, TCEA1, NFATC2, ETV4, TLX1, ZNF423, KLF5, ZBTB7B, BMP4, PTPRC, YEATS4, LMX1B, IKZF1, MAML2, FOXA1, SMAD5, TEAD1, CREB5, WWTR1, CENPK…	1113	644	13528	1.32115	1	0.208626	21.5628
GOTERM_BP_FAT	GO:0031577~spindle checkpoint	5	0.324044	0.01315	MAD2L1, BUB1, TTK, BIRC5, CENPE	1113	12	13528	5.06439	1	0.208153	21.6069
GOTERM_BP_FAT	GO:0001934~positive regulation of protein amino acid phosphorylation	15	0.972132	0.0134597	BMP4, LYN, CD3E, HCLS1, TTK, TNFRSF14, TLR4, EDNRB, NOD2, CCND1, CCND3, CLCF1, CD4, BMP7, FGF2	1113	89	13528	2.04852	1	0.211613	22.058
GOTERM_BP_FAT	GO:0031589~cell-substrate adhesion	16	1.03694	0.0136929	ITGA11, ITGB4, ITGA2, ITGA10, ITGB2, ITGB1, VWF, SIGLEC1, ITGA6, CTGF, FREM1, ITGAD, ANTXR1, LAMC1, TRIP6, ADAM9	1113	98	13528	1.98441	1	0.213962	22.3961
GOTERM_BP_FAT	GO:0030261~chromosome condensation	7	0.453662	0.0138499	NCAPH, NUSAP1, TTN, CDCA5, TOP2A, SMC2, SMC4	1113	25	13528	3.40327	1	0.21523	22.6229
GOTERM_BP_FAT	GO:0051253~negative regulation of RNA metabolic process	43	2.78678	0.0140369	MTDH, FOXK1, SOX2, ZEB1, PAX3, REST, CALR, GLI2, ZNF254, TCF7L1, HEXIM1, HEY2, NPM1, FOXF2, SKIL, BHLHE40, FGF2, ENO1, SIM2, MDFI, GSC, SP100, IKZF1, TBX2, FOXA1, MLXIPL, CSDA, WWTR1, SIRT1, STAT3, SUZ12, HOXB4, HOXD8, SALL4, NEDD4, IRF8, TGIF1, IRF2, ID3, PRDM1, TBL1X, ZFHX3, KLF4	1113	362	13528	1.44377	1	0.216897	22.8923
GOTERM_BP_FAT	GO:0043062~extracellular structure organization	23	1.4906	0.0142511	B4GALT1, PCDHB5, LMX1B, PCDHB3, ADAMTSL4, HSPG2, PCDHB14, COL2A1, CDH2, PCDHB11, SERPINH1, PCDHB10, COL5A2, ANXA2P2, ANXA2, ATP7A, P4HA1, KAZALD1, FOXF2, LAMC1, LOX, ADAMTS2, F2R	1113	163	13528	1.71506	1	0.218916	23.1998
GOTERM_BP_FAT	GO:0042472~inner ear morphogenesis	11	0.712897	0.0148587	ATOH1, CLIC5, DLX5, SOX2, SIX1, POU4F3, PRRX1, FZD3, COL2A1, SIX4, OTOP1	1113	56	13528	2.3875	1	0.226223	24.0658
GOTERM_BP_FAT	GO:0042108~positive regulation of cytokine biosynthetic process	10	0.648088	0.0149908	CD86, CD3E, HMOX1, STAT5A, IRF1, TLR3, CD4, TLR4, IRF4, TLR8	1113	48	13528	2.5322	1	0.22706	24.2528
GOTERM_BP_FAT	GO:0060216~definitive hemopoiesis	4	0.259235	0.0150692	HOXB3, HOXB4, SP3, TGFBR3	1113	7	13528	6.94545	1	0.227173	24.3636
GOTERM_BP_FAT	GO:0045059~positive thymic T cell selection	4	0.259235	0.0150692	PTPRC, CD3D, ZAP70, CD74	1113	7	13528	6.94545	1	0.227173	24.3636
GOTERM_BP_FAT	GO:0006882~cellular zinc ion homeostasis	4	0.259235	0.0150692	SLC30A1, LCK, SLC30A5, MT1H	1113	7	13528	6.94545	1	0.227173	24.3636
GOTERM_BP_FAT	GO:0002532~production of molecular mediator of acute inflammatory response	4	0.259235	0.0150692	LYN, EPHX2, TLR4, IDO1	1113	7	13528	6.94545	1	0.227173	24.3636
GOTERM_BP_FAT	GO:0048387~negative regulation of retinoic acid receptor signaling pathway	4	0.259235	0.0150692	PRAME, CYP26C1, TGIF1, CALR	1113	7	13528	6.94545	1	0.227173	24.3636
GOTERM_BP_FAT	GO:0051323~metaphase	4	0.259235	0.0150692	CDCA8, FBXO5, CENPE, MYH9	1113	7	13528	6.94545	1	0.227173	24.3636
GOTERM_BP_FAT	GO:0002011~morphogenesis of an epithelial sheet	4	0.259235	0.0150692	NOTCH2, HOXB4, DAG1, JAG1	1113	7	13528	6.94545	1	0.227173	24.3636
GOTERM_BP_FAT	GO:0048812~neuron projection morphogenesis	28	1.81465	0.015833	NRP2, S100A6, PARD3, GJA1, GLI2, SHH, ALCAM, ATOH1, CXCR4, KAL1, POU4F3, ROBO3, ETV4, RUNX3, NKX2-8, OTX2, GAS1, NTN1, VASP, ATP7A, SMO, SEMA6A, NCAM2, EPHA7, ISL2, DLX5, BMP7, BMPR1B	1113	213	13528	1.59778	1	0.23632	25.435
GOTERM_BP_FAT	GO:0052548~regulation of endopeptidase activity	14	0.907323	0.0158659	CARD8, MGMT, PML, BIRC5, BCL2L13, STAT1, RPS3, TNFRSF10A, CDKN2A, BAX, LCK, HSPA5, IFI6, F2R	1113	82	13528	2.07516	1	0.235797	25.4809
GOTERM_BP_FAT	GO:0014032~neural crest cell development	8	0.518471	0.0159778	NRP2, FGF19, SMO, EDNRB, CYP26C1, HAND2, PAX3, SHH	1113	33	13528	2.94655	1	0.236304	25.6365
GOTERM_BP_FAT	GO:0014033~neural crest cell differentiation	8	0.518471	0.0159778	NRP2, FGF19, SMO, EDNRB, CYP26C1, HAND2, PAX3, SHH	1113	33	13528	2.94655	1	0.236304	25.6365
GOTERM_BP_FAT	GO:0045665~negative regulation of neuron differentiation	8	0.518471	0.0159778	NOTCH3, MIB1, ISL2, FOXA2, SOX2, REST, CALR, ASPM	1113	33	13528	2.94655	1	0.236304	25.6365
GOTERM_BP_FAT	GO:0048754~branching morphogenesis of a tube	12	0.777706	0.0161039	B4GALT1, BMP4, TIMELESS, FOXA2, CXCR4, FOXA1, SIX1, TGFBR2, GLI2, BMP7, GLI3, SHH	1113	65	13528	2.24391	1	0.236989	25.8115
GOTERM_BP_FAT	GO:0009615~response to virus	17	1.10175	0.0162599	PTPRC, IFIH1, BST2, ZC3HAV1, BNIP3, TLR3, APOBEC3G, STAT1, APOBEC3F, TLR8, IFI35, ISG20, DDX58, TRIM5, ISG15, CXCR4, DNAJC3	1113	109	13528	1.89566	1	0.238053	26.0275
GOTERM_BP_FAT	GO:0045937~positive regulation of phosphate metabolic process	16	1.03694	0.0162995	BMP4, LYN, CD3E, HCLS1, TTK, TNFRSF14, TLR4, EDNRB, NOD2, CCND1, CCND3, ANG, CLCF1, CD4, BMP7, FGF2	1113	100	13528	1.94473	1	0.237618	26.0823
GOTERM_BP_FAT	GO:0048872~homeostasis of number of cells	16	1.03694	0.0162995	BMP4, LYN, HCLS1, STAT5A, SMAD5, IREB2, IL7R, DNASE2, RPS19, HMOX1, BAX, SP3, HOXB6, TGFBR3, TCEA1, F2R	1113	100	13528	1.94473	1	0.237618	26.0823
GOTERM_BP_FAT	GO:0010562~positive regulation of phosphorus metabolic process	16	1.03694	0.0162995	BMP4, LYN, CD3E, HCLS1, TTK, TNFRSF14, TLR4, EDNRB, NOD2, CCND1, CCND3, ANG, CLCF1, CD4, BMP7, FGF2	1113	100	13528	1.94473	1	0.237618	26.0823
GOTERM_BP_FAT	GO:0045076~regulation of interleukin-2 biosynthetic process	6	0.388853	0.0163272	CD86, CD3E, STAT5A, CD4, IRF4, LAG3	1113	19	13528	3.83827	1	0.237034	26.1205
GOTERM_BP_FAT	GO:0050688~regulation of defense response to virus	6	0.388853	0.0163272	DDX58, CD8B, PML, APOBEC3G, IL15, APOBEC3F	1113	19	13528	3.83827	1	0.237034	26.1205
GOTERM_BP_FAT	GO:0051216~cartilage development	13	0.842515	0.016938	BMP4, WNT5A, HSPG2, PRRX1, COL2A1, ZEB1, HOXB3, ATP7A, CHRDL2, HOXA3, CTGF, BMPR1B, BMP7	1113	74	13528	2.13526	1	0.243827	26.9596
GOTERM_BP_FAT	GO:0001763~morphogenesis of a branching structure	13	0.842515	0.016938	BMP4, B4GALT1, FOXA2, FOXA1, TGFBR2, GLI2, GLI3, SHH, EPHA7, TIMELESS, CXCR4, SIX1, BMP7	1113	74	13528	2.13526	1	0.243827	26.9596
GOTERM_BP_FAT	GO:0045892~negative regulation of transcription, DNA-dependent	42	2.72197	0.0172416	MTDH, FOXK1, SOX2, ZEB1, PAX3, REST, CALR, GLI2, ZNF254, TCF7L1, HEXIM1, HEY2, FOXF2, SKIL, BHLHE40, FGF2, ENO1, SIM2, MDFI, GSC, SP100, IKZF1, TBX2, FOXA1, MLXIPL, CSDA, WWTR1, SIRT1, STAT3, SUZ12, HOXB4, HOXD8, SALL4, NEDD4, IRF8, TGIF1, IRF2, ID3, PRDM1, TBL1X, ZFHX3, KLF4	1113	356	13528	1.43396	1	0.246679	27.3734
GOTERM_BP_FAT	GO:0002683~negative regulation of immune system process	14	0.907323	0.0174444	PTPRC, ELF1, TNFRSF14, SERPING1, IDO1, IL7R, SHH, CD74, NOD2, CDKN2A, LAX1, HMOX1, INPP5D, LAG3	1113	83	13528	2.05016	1	0.248245	27.6485
GOTERM_BP_FAT	GO:0007568~aging	17	1.10175	0.0176261	NOX4, TBX2, MSH2, SOCS3, PML, RPS6KB1, IL15, CALR, SIRT1, TIMP3, C1QB, CDKN2A, GSN, NPM1, CTSC, INPP5D, IGFBP2	1113	110	13528	1.87843	1	0.249535	27.8942
GOTERM_BP_FAT	GO:0051640~organelle localization	15	0.972132	0.0176924	CCDC99, CEP120, MLPH, DLGAP5, NUSAP1, CENPE, BIRC5, MYH9, TACC3, NTN1, SEMA6A, NPM1, CDCA5, ASPM, PINX1	1113	92	13528	1.98172	1	0.249395	27.9835
GOTERM_BP_FAT	GO:0002697~regulation of immune effector process	16	1.03694	0.017738	PTPRC, CD8B, STAT5A, PML, KLRK1, SERPING1, APOBEC3G, IL15, IL7R, APOBEC3F, B2M, DDX58, NOD2, HMOX1, IL13RA1, LAG3	1113	101	13528	1.92547	1	0.249004	28.045
GOTERM_BP_FAT	GO:0009725~response to hormone stimulus	43	2.78678	0.0177529	HMGB2, STAT5A, GNG11, RPS6KB1, AURKA, TIMP3, SHH, LATS2, PHIP, ANG, HMOX1, SHC1, LOX, PIK3R3, ADAM9, BMP4, PNLIPRP1, LYN, SOCS3, HCLS1, BCKDHB, SOCS1, TGFBR2, ITGA2, CDO1, STAT1, APPL1, IRS1, JUNB, BRCA1, STAT3, C1QB, CD38, CCND1, SDC1, KRT19, BTG2, TGFBR3, CA4, CA2, IGFBP2, STEAP2, BMP7	1113	367	13528	1.4241	1	0.248242	28.0651
GOTERM_BP_FAT	GO:0045086~positive regulation of interleukin-2 biosynthetic process	5	0.324044	0.0177796	CD86, CD3E, STAT5A, CD4, IRF4	1113	13	13528	4.67482	1	0.247629	28.1011
GOTERM_BP_FAT	GO:0045061~thymic T cell selection	5	0.324044	0.0177796	PTPRC, CD3D, CD3E, ZAP70, CD74	1113	13	13528	4.67482	1	0.247629	28.1011
GOTERM_BP_FAT	GO:0001556~oocyte maturation	5	0.324044	0.0177796	CCNB1, ANG, FBXO5, PDE3A, CDC25B	1113	13	13528	4.67482	1	0.247629	28.1011
GOTERM_BP_FAT	GO:0032880~regulation of protein localization	20	1.29618	0.0178952	MDFI, BMP4, CARD8, CEP120, CENPE, CDH2, TACC3, APPL1, SIRT1, GLI3, UHMK1, SHH, RSL1D1, SMO, NOD2, ANG, TRIP6, SRGN, LCP1, ADAM9	1113	138	13528	1.76153	1	0.248097	28.2565
GOTERM_BP_FAT	GO:0042471~ear morphogenesis	12	0.777706	0.0179363	ATOH1, CLIC5, DLX5, SOX2, SIX1, POU4F3, PRRX1, FZD3, COL2A1, SIX4, GAS1, OTOP1	1113	66	13528	2.20992	1	0.247663	28.3117
GOTERM_BP_FAT	GO:0046822~regulation of nucleocytoplasmic transport	11	0.712897	0.0187794	MDFI, BMP4, SMO, CDKN2A, NEDD4, TRIP6, TACC3, SIRT1, GLI3, SHH, UHMK1	1113	58	13528	2.30517	1	0.2568	29.435
GOTERM_BP_FAT	GO:0031175~neuron projection development	32	2.07388	0.0188397	NRP2, FGFR1, PARD3, S100A6, GJA1, GLI2, SHH, ALCAM, ATOH1, CXCR4, KAL1, POU4F3, ROBO3, ETV4, RUNX3, NKX2-8, OTX2, GAS1, NTN1, VASP, ATP7A, SMO, SEMA6A, NCAM2, EPHA7, ISL2, NEDD4, DLX5, PHGDH, BMPR1B, BMP7, IGSF9	1113	256	13528	1.51932	1	0.256566	29.5149
GOTERM_BP_FAT	GO:0021910~smoothened signaling pathway involved in ventral spinal cord patterning	3	0.194426	0.0191457	SMO, GLI2, GLI3	1113	3	13528	12.1545	1	0.259218	29.9179
GOTERM_BP_FAT	GO:0033189~response to vitamin A	9	0.583279	0.0194278	BMP4, CD38, SP100, SOX2, IGFBP2, AQP3, SHH, KLF4, MEST	1113	42	13528	2.60454	1	0.261562	30.2877
GOTERM_BP_FAT	GO:0046638~positive regulation of alpha-beta T cell differentiation	6	0.388853	0.020331	CD83, CD86, IKZF1, TGFBR2, ZAP70, IL2RG	1113	20	13528	3.64636	1	0.271025	31.4592
GOTERM_BP_FAT	GO:0045944~positive regulation of transcription from RNA polymerase II promoter	43	2.78678	0.0208638	HMGB2, ELF1, FOXA2, STAT5A, SOX2, PAX3, ZEB1, GLI2, SHH, TCF7L1, PLAGL1, ATOH1, S1PR1, GATA6, HAND2, TCEA1, YAP1, NFATC2, FGF2, TLX1, BMP4, ZBTB7B, LMX1B, IKZF1, FOXA1, SMAD5, MAML2, MLXIPL, TEAD1, SIX4, CENPK, WWTR1, JUNB, STAT3, AHR, SALL4, ETS1, SIX1, IRF1, IRF4, TBL1X, BMP7, KLF4	1113	371	13528	1.40875	1	0.276112	32.1415
GOTERM_BP_FAT	GO:0051090~regulation of transcription factor activity	16	1.03694	0.0209037	MTDH, SP100, EDA2R, TLR3, TLR4, PRDX3, SIRT1, SHH, RPS3, NOD2, CDKN2A, NCOA3, HMOX1, NPM1, TGFBR3, ID3	1113	103	13528	1.88808	1	0.275579	32.1922
GOTERM_BP_FAT	GO:0002253~activation of immune response	15	0.972132	0.0210309	PTPRC, LYN, CD3E, KLRK1, TLR3, SERPING1, C1R, TLR4, C1QC, C1QA, C1QB, NOD2, LAX1, C1RL, ZAP70	1113	94	13528	1.93955	1	0.276032	32.3541
GOTERM_BP_FAT	GO:0051338~regulation of transferase activity	43	2.78678	0.0216961	PARD3, SNX6, TLR3, MAP4K1, PRDX3, LPAR1, CCNG1, TTN, CD74, LATS2, SERINC5, CDKN2A, CXCR4, ANG, HEXIM1, NPM1, TGFA, CD4, SHC1, PDGFC, SPRED1, PPAP2A, FGF2, ADAM9, FGD4, PINX1, MDFI, CDC6, PTPRC, PIF1, TGFBR2, HERC5, CENPE, IRS1, CDC25B, TNFRSF10A, CCND1, PRLR, CCND3, LAX1, HIPK3, CKS2, F2R	1113	372	13528	1.40496	1	0.282475	33.1944
GOTERM_BP_FAT	GO:0030218~erythrocyte differentiation	9	0.583279	0.0222036	DNASE2, BMP4, RPS19, LYN, HCLS1, SP3, SMAD5, TGFBR3, TCEA1	1113	43	13528	2.54397	1	0.287084	33.8289
GOTERM_BP_FAT	GO:0045667~regulation of osteoblast differentiation	9	0.583279	0.0222036	BMP4, TWSG1, DLX5, SOX2, SMAD5, CDK6, BMP7, BMPR1B, TOB1	1113	43	13528	2.54397	1	0.287084	33.8289
GOTERM_BP_FAT	GO:0030198~extracellular matrix organization	16	1.03694	0.0226383	B4GALT1, LMX1B, ADAMTSL4, HSPG2, COL2A1, SERPINH1, COL5A2, ANXA2, ANXA2P2, ATP7A, P4HA1, KAZALD1, FOXF2, LAMC1, LOX, ADAMTS2	1113	104	13528	1.86993	1	0.290835	34.3678
GOTERM_BP_FAT	GO:0055069~zinc ion homeostasis	4	0.259235	0.0226541	SLC30A1, LCK, SLC30A5, MT1H	1113	8	13528	6.07727	1	0.290003	34.3873
GOTERM_BP_FAT	GO:0045060~negative thymic T cell selection	4	0.259235	0.0226541	PTPRC, CD3E, ZAP70, CD74	1113	8	13528	6.07727	1	0.290003	34.3873
GOTERM_BP_FAT	GO:0019884~antigen processing and presentation of exogenous antigen	5	0.324044	0.0233046	PSME1, IFI30, CD74, HLA-DRA, B2M	1113	14	13528	4.34091	1	0.296017	35.1858
GOTERM_BP_FAT	GO:0051209~release of sequestered calcium ion into cytosol	5	0.324044	0.0233046	IBTK, PTPRC, LCK, XCR1, F2R	1113	14	13528	4.34091	1	0.296017	35.1858
GOTERM_BP_FAT	GO:0051283~negative regulation of sequestering of calcium ion	5	0.324044	0.0233046	IBTK, PTPRC, LCK, XCR1, F2R	1113	14	13528	4.34091	1	0.296017	35.1858
GOTERM_BP_FAT	GO:0051282~regulation of sequestering of calcium ion	5	0.324044	0.0233046	IBTK, PTPRC, LCK, XCR1, F2R	1113	14	13528	4.34091	1	0.296017	35.1858
GOTERM_BP_FAT	GO:0051091~positive regulation of transcription factor activity	11	0.712897	0.0234101	NOD2, SP100, MTDH, NCOA3, NPM1, TGFBR3, TLR3, EDA2R, TLR4, PRDX3, SHH	1113	60	13528	2.22833	1	0.296136	35.3144
GOTERM_BP_FAT	GO:0007159~leukocyte adhesion	7	0.453662	0.0238764	VCAM1, PTPRC, EZR, ROCK1, ITGB2, ITGA4, ITGB1	1113	28	13528	3.03863	1	0.300082	35.88
GOTERM_BP_FAT	GO:0032844~regulation of homeostatic process	17	1.10175	0.0239888	IBTK, PTPRC, LYN, PIF1, STAT5A, CDK6, CDH2, TNKS2, CD38, ETS1, BAX, LCK, CA2, INPP5D, XCR1, IFI6, F2R	1113	114	13528	1.81252	1	0.300257	36.0157
GOTERM_BP_FAT	GO:0043066~negative regulation of apoptosis	41	2.65716	0.0242667	TMX1, MCL1, NUAK2, STAT5A, BNIP3, COL2A1, PRDX3, CD74, SHH, EDNRB, CLCF1, HMOX1, NPM1, GLO1, HSPA5, DDAH2, CDK1, IL2RB, PRAME, ROCK1, SOCS3, MSH2, ANXA1, PDE3A, BIRC5, IDO1, CSDA, BIRC3, NOTCH2, SMO, AMIGO2, KRT18, PRLR, BTG2, TNFRSF10D, BAX, HIPK3, TNFAIP8, IFI6, GSTP1, F2R	1113	354	13528	1.40773	1	0.302165	36.3499
GOTERM_BP_FAT	GO:0048592~eye morphogenesis	12	0.777706	0.0243635	BMP4, SOX1, SP3, BAX, SOX2, ZEB1, GAS1, BMP7, COL8A1, COL5A2, GLI3, STAT3	1113	69	13528	2.11383	1	0.302167	36.4659
GOTERM_BP_FAT	GO:0031099~regeneration	12	0.777706	0.0243635	NOTCH3, CCNB1, NOTCH2, SMO, CCND1, SOCS3, GSN, SOCS1, AXL, NINJ1, TIMP3, PLAU	1113	69	13528	2.11383	1	0.302167	36.4659
GOTERM_BP_FAT	GO:0043627~response to estrogen stimulus	16	1.03694	0.024479	BMP4, SOCS3, SOCS1, TGFBR2, AURKA, TIMP3, BRCA1, STAT3, SHH, CD38, KRT19, CCND1, HMOX1, CA2, IGFBP2, BMP7	1113	105	13528	1.85212	1	0.302362	36.604
GOTERM_BP_FAT	GO:0048610~reproductive cellular process	22	1.42579	0.0246547	B4GALT1, BMP4, MSH2, SMAD5, CTCFL, CASC5, SIX5, PDE3A, RPS6KB1, ITGB1, SHH, CDC25B, CCNB1, HIST1H1T, SDC1, CCND1, CXCR4, ANG, BAX, FBXO5, PPAP2A, ATP8B3	1113	162	13528	1.65062	1	0.30318	36.8137
GOTERM_BP_FAT	GO:0051099~positive regulation of binding	13	0.842515	0.024843	MTDH, SP100, ITGA2, EDA2R, TLR3, TLR4, PRDX3, SHH, NOD2, NCOA3, NPM1, TGFBR3, IRF4	1113	78	13528	2.02576	1	0.30412	37.0377
GOTERM_BP_FAT	GO:0030101~natural killer cell activation	6	0.388853	0.0249257	IKZF1, SP3, STAT5A, KLRK1, CD2, SLAMF7	1113	21	13528	3.47272	1	0.303969	37.1358
GOTERM_BP_FAT	GO:0070304~positive regulation of stress-activated protein kinase signaling pathway	6	0.388853	0.0249257	FGF19, NOD2, LYN, TLR3, EDA2R, TLR4	1113	21	13528	3.47272	1	0.303969	37.1358
GOTERM_BP_FAT	GO:0048593~camera-type eye morphogenesis	9	0.583279	0.0252478	BMP4, SOX1, SP3, BAX, SOX2, ZEB1, BMP7, COL8A1, GLI3	1113	44	13528	2.48616	1	0.306261	37.5166
GOTERM_BP_FAT	GO:0051098~regulation of binding	21	1.36099	0.0257129	MDFI, SP100, MTDH, TLR3, ITGA2, EDA2R, TLR4, PRDX3, SIRT1, SHH, RPS3, SMO, NOD2, CDKN2A, NCOA3, HMOX1, BAX, NPM1, TGFBR3, ID3, IRF4	1113	153	13528	1.66827	1	0.309972	38.0626
GOTERM_BP_FAT	GO:0009636~response to toxin	11	0.712897	0.0260114	ATP7A, TYMS, SDC1, LYN, BAX, SLC6A14, EPHX2, RPS6KB1, NQO1, MT1H, SLC7A11	1113	61	13528	2.1918	1	0.311969	38.4106
GOTERM_BP_FAT	GO:0019221~cytokine-mediated signaling pathway	12	0.777706	0.0268376	IRAK4, PLP2, IL2RB, KRT18, SP100, CLCF1, CCR1, STAT5A, SOCS1, KRT8, STAT1, STAT3	1113	70	13528	2.08363	1	0.319181	39.3643
GOTERM_BP_FAT	GO:0051270~regulation of cell motion	25	1.62022	0.0269822	PARD3, RPS6KB1, JAG1, SHH, VCL, CXCL10, S1PR1, CXCR4, HMOX1, FGF2, ADAM9, B4GALT1, SP100, LYN, ITGA2, NEXN, NTN1, IRS1, LAMA4, RPS19, ETS1, CXCL16, TGFBR3, TRIP6, F2R	1113	193	13528	1.57442	1	0.319591	39.5299
GOTERM_BP_FAT	GO:0007409~axonogenesis	25	1.62022	0.0269822	NRP2, S100A6, PARD3, GLI2, SHH, ALCAM, ATOH1, CXCR4, KAL1, POU4F3, ROBO3, RUNX3, ETV4, NKX2-8, OTX2, GAS1, NTN1, VASP, SEMA6A, NCAM2, EPHA7, ISL2, DLX5, BMP7, BMPR1B	1113	193	13528	1.57442	1	0.319591	39.5299
GOTERM_BP_FAT	GO:0033157~regulation of intracellular protein transport	10	0.648088	0.0274793	MDFI, BMP4, SMO, TRIP6, TACC3, SIRT1, GLI3, SHH, UHMK1, LCP1	1113	53	13528	2.29331	1	0.323444	40.0954
GOTERM_BP_FAT	GO:0009628~response to abiotic stimulus	42	2.72197	0.0279223	NEK1, SOX2, PML, TLR3, GJA1, RPS6KB1, OBFC2A, TIMP3, AEN, TFEC, CASP7, SLC2A1, TRPV4, ERO1L, MYOF, OTOP1, BMP4, PTPRC, NES, LYN, SLC12A2, SOCS3, MSH2, USP1, TGFBR2, ITGA2, CSDA, STAT1, GMPR, BRCA1, JUNB, CCND1, PPM1D, THBD, BTG2, TIMELESS, NEDD4, BAX, DDB2, CA2, IGFBP2, SCARA5	1113	368	13528	1.3872	1	0.326725	40.5953
GOTERM_BP_FAT	GO:0002831~regulation of response to biotic stimulus	7	0.453662	0.0280761	DDX58, NOD2, CD8B, PML, APOBEC3G, IL15, APOBEC3F	1113	29	13528	2.93385	1	0.327187	40.7679
GOTERM_BP_FAT	GO:0032268~regulation of cellular protein metabolic process	52	3.37006	0.0281598	IMPACT, TTK, TLR4, SHH, EDNRB, NOD2, CDKN2A, CLCF1, ANG, PDGFC, PDGFD, FGF2, ADAM9, IBTK, CDK1, LYN, SOCS3, CD3E, SOCS1, TNFRSF14, SERPING1, UBE2C, CCND1, MAD2L1, PSME1, CCND3, HIPK3, NANOS1, PML, MAP4K1, CTCFL, IGF2BP2, ITGB2, CALR, TIMP3, ZFP36L1, FBXO5, CD4, CD6, FGD4, MDFI, BMP4, PTPRC, HCLS1, IREB2, ITGA2, CDC20, BRCA1, CCNB1, BAX, SH3D19, BMP7	1113	474	13528	1.33341	1	0.326973	40.8616
GOTERM_BP_FAT	GO:0002526~acute inflammatory response	15	0.972132	0.0290983	B4GALT1, LYN, EPHX2, SERPING1, C1R, TLR4, IDO1, C1QC, STAT3, CD163, C1QA, APOL2, C1QB, C1RL, REG3G	1113	98	13528	1.86039	1	0.334893	41.9031
GOTERM_BP_FAT	GO:0032386~regulation of intracellular transport	12	0.777706	0.0294879	MDFI, BMP4, SMO, CDKN2A, NEDD4, TRIP6, TACC3, SIRT1, GLI3, SHH, UHMK1, LCP1	1113	71	13528	2.05429	1	0.337532	42.3303
GOTERM_BP_FAT	GO:0043069~negative regulation of programmed cell death	41	2.65716	0.029608	TMX1, MCL1, NUAK2, STAT5A, BNIP3, COL2A1, PRDX3, CD74, SHH, EDNRB, CLCF1, HMOX1, NPM1, GLO1, HSPA5, DDAH2, CDK1, IL2RB, PRAME, ROCK1, SOCS3, MSH2, ANXA1, PDE3A, BIRC5, IDO1, CSDA, BIRC3, NOTCH2, SMO, AMIGO2, KRT18, PRLR, BTG2, TNFRSF10D, BAX, HIPK3, TNFAIP8, IFI6, GSTP1, F2R	1113	359	13528	1.38812	1	0.337627	42.4614
GOTERM_BP_FAT	GO:0007166~cell surface receptor linked signal transduction	175	11.3415	0.0302782	OR51D1, GPR126, OR1J2, OSMR, FGF17, STAT5A, OR1J4, FSTL1, LPAR1, JAG1, SHH, CXCL10, OR4D1, S1PR1, CTGF, OR7C1, PDGFC, ADAM8, ADAM9, CD3G, CSNK1G1, CD3D, CD3E, TNFRSF14, MYH9, IRS1, MIB1, CCR5, CCR3, RNF138, PYGO2, OR10K2, WNT5A, FGFR1, TWSG1, IFITM1, KLRK1, ITGA11, ITGB4, ITGA10, OR11G2, ITGB2, ABCA1, POMC, ITGB1, ADCYAP1, P2RY6, DOCK1, ZAP70, ENTPD2, BMP4, OR4K5, OR1I1, OR2AG2, SMAD5, MAML2, TGF…	1113	1856	13528	1.14604	1	0.342829	43.1879
GOTERM_BP_FAT	GO:0032990~cell part morphogenesis	31	2.00907	0.0306164	NRP2, PARD3, S100A6, GJA1, GLI2, SHH, ALCAM, ATOH1, CXCR4, COL4A3BP, KAL1, POU4F3, ROBO3, ETV4, RUNX3, NKX2-8, OTX2, GAS1, WWTR1, NTN1, VASP, ATP7A, SMO, SEMA6A, NCAM2, EPHA7, ISL2, DLX5, BAX, BMPR1B, BMP7	1113	256	13528	1.47184	1	0.34491	43.5511
GOTERM_BP_FAT	GO:0060548~negative regulation of cell death	41	2.65716	0.0307978	TMX1, MCL1, NUAK2, STAT5A, BNIP3, COL2A1, PRDX3, CD74, SHH, EDNRB, CLCF1, HMOX1, NPM1, GLO1, HSPA5, DDAH2, CDK1, IL2RB, PRAME, ROCK1, SOCS3, MSH2, ANXA1, PDE3A, BIRC5, IDO1, CSDA, BIRC3, NOTCH2, SMO, AMIGO2, KRT18, PRLR, BTG2, TNFRSF10D, BAX, HIPK3, TNFAIP8, IFI6, GSTP1, F2R	1113	360	13528	1.38427	1	0.345538	43.7451
GOTERM_BP_FAT	GO:0048584~positive regulation of response to stimulus	29	1.87946	0.0311733	FGF19, OSMR, STAT5A, KLRK1, TLR3, C1R, TLR4, IL15, C1QC, TLR8, B2M, NOD2, S1PR1, ZAP70, LAG3, PTPRC, LYN, CD3E, EDA2R, ITGA2, SERPING1, IDO1, IRS1, BRCA1, C1QA, C1QB, LAX1, C1RL, HLA-DRA	1113	236	13528	1.49357	1	0.347926	44.1445
GOTERM_BP_FAT	GO:0035108~limb morphogenesis	15	0.972132	0.0314282	WNT5A, CRABP2, PRRX1, COL2A1, GAS1, MBNL1, GLI3, SHH, NOTCH2, SALL4, BAX, DLX5, LRP6, FBN2, BMPR1B	1113	99	13528	1.8416	1	0.349201	44.4142
GOTERM_BP_FAT	GO:0035107~appendage morphogenesis	15	0.972132	0.0314282	WNT5A, CRABP2, PRRX1, COL2A1, GAS1, MBNL1, GLI3, SHH, NOTCH2, SALL4, BAX, DLX5, LRP6, FBN2, BMPR1B	1113	99	13528	1.8416	1	0.349201	44.4142
GOTERM_BP_FAT	GO:0030879~mammary gland development	11	0.712897	0.0318225	B4GALT1, PRLR, TBX2, STAT5A, HK2, ITGA2, GLI2, CDO1, NTN1, IRS1, GLI3	1113	63	13528	2.12222	1	0.351716	44.8289
GOTERM_BP_FAT	GO:0043368~positive T cell selection	4	0.259235	0.0319378	PTPRC, CD3D, ZAP70, CD74	1113	9	13528	5.40202	1	0.351713	44.9495
GOTERM_BP_FAT	GO:0021936~regulation of granule cell precursor proliferation	4	0.259235	0.0319378	SMO, GLI2, FGF2, SHH	1113	9	13528	5.40202	1	0.351713	44.9495
GOTERM_BP_FAT	GO:0021940~positive regulation of granule cell precursor proliferation	4	0.259235	0.0319378	SMO, GLI2, FGF2, SHH	1113	9	13528	5.40202	1	0.351713	44.9495
GOTERM_BP_FAT	GO:0048385~regulation of retinoic acid receptor signaling pathway	4	0.259235	0.0319378	PRAME, CYP26C1, TGIF1, CALR	1113	9	13528	5.40202	1	0.351713	44.9495
GOTERM_BP_FAT	GO:0007080~mitotic metaphase plate congression	4	0.259235	0.0319378	CCDC99, CENPE, CDCA5, PINX1	1113	9	13528	5.40202	1	0.351713	44.9495
GOTERM_BP_FAT	GO:0043383~negative T cell selection	4	0.259235	0.0319378	PTPRC, CD3E, ZAP70, CD74	1113	9	13528	5.40202	1	0.351713	44.9495
GOTERM_BP_FAT	GO:0009113~purine base biosynthetic process	4	0.259235	0.0319378	SHMT1, PRPS1L1, PAICS, GMPS	1113	9	13528	5.40202	1	0.351713	44.9495
GOTERM_BP_FAT	GO:0048660~regulation of smooth muscle cell proliferation	9	0.583279	0.0321851	S1PR1, ANG, TGFBR2, ITGA2, RPS6KB1, IL15, CALCRL, STAT1, KLF4	1113	46	13528	2.37806	1	0.352887	45.2077
GOTERM_BP_FAT	GO:0001816~cytokine production	9	0.583279	0.0321851	IRAK4, NOD2, LYN, CD4, TLR4, ABCA1, IDO1, NFATC2, LCP2	1113	46	13528	2.37806	1	0.352887	45.2077
GOTERM_BP_FAT	GO:0007242~intracellular signaling cascade	122	7.90668	0.0326311	STAT5A, IQGAP3, TLR3, RPS6KB1, AURKA, TLR4, RPS27L, LPAR1, TLR8, RGL1, S1PR1, CTGF, ARL14, DEPDC1B, SPRED1, DDAH2, ADAM9, EDARADD, DEPDC7, ROCK1, RREB1, SOCS3, SOCS1, MLXIPL, SOCS6, SOCS4, DEPDC1, IRS1, STK3, ASB9, CCR3, ZWINT, ACAP1, ASB2, RAB13, WNT5A, FGFR1, HMGB2, STK17B, MAP4K1, ABCA1, CALR, CD74, IRAK4, P2RY6, DOCK1, PLCH1, ZAP70, CDC42EP4, FGD4, MDFI, ITK, KLF9, BRIP1, BRCA1, RGS1, NEDD4, …	1113	1256	13528	1.18062	1	0.355806	45.6701
GOTERM_BP_FAT	GO:0044093~positive regulation of molecular function	62	4.01815	0.0326542	GM2A, TLR3, TLR4, LPAR1, PRDX3, SHH, RPS3, EDNRB, NOD2, S1PR1, CDKN2A, ANG, CXCR4, TGFA, SHC1, PDGFC, CALCRL, FGF2, ADAM9, CDK1, SP100, BCL2L13, UBE2C, IRS1, TNFRSF10A, CCND1, PSME1, NCOA3, CCND3, LCK, PARD3, MTDH, PML, MAP4K1, CD74, ADCYAP1, SERINC5, P2RY6, NPM1, FBXO5, CD4, PPAP2A, FGD4, MDFI, PTPRC, CARD8, MSH2, TGFBR2, ITGA2, EDA2R, CDC20, CENPE, STAT1, CDC25B, CCNB1, ATP7A, PRLR, SYDE1, BAX,…	1113	586	13528	1.28597	1	0.354979	45.694
GOTERM_BP_FAT	GO:0002377~immunoglobulin production	7	0.453662	0.0327349	EXO1, PTPRC, NOD2, LAX1, SWAP70, MSH2, IL7R	1113	30	13528	2.83606	1	0.354662	45.7773
GOTERM_BP_FAT	GO:0032663~regulation of interleukin-2 production	7	0.453662	0.0327349	CD83, CD86, CD3E, STAT5A, CD4, IRF4, LAG3	1113	30	13528	2.83606	1	0.354662	45.7773
GOTERM_BP_FAT	GO:0030178~negative regulation of Wnt receptor signaling pathway	7	0.453662	0.0327349	DKK2, MDFI, CCND1, GSC, SOX2, LRP6, SOX17	1113	30	13528	2.83606	1	0.354662	45.7773
GOTERM_BP_FAT	GO:0008283~cell proliferation	48	3.11082	0.0328229	TMX1, FGF8, CEP120, CDC14A, OSMR, E2F8, EHF, IL15, ZEB1, IL7R, GLI2, CD74, SHH, LGR4, ISG20, CXCR4, HMOX1, COL4A3BP, CREG1, BUB1, TGFA, COL8A1, RUNX3, ASPM, BMP4, PTPRC, MKI67, BST2, LMX1B, DLGAP5, TPX2, ITGA2, FZD3, APPL1, TACC3, HOXB4, UHRF1, CD86, LAMP3, CCND3, BAX, CKS2, PCNA, TGFBR3, IRF2, RAP1B, EMP2, EMP1	1113	436	13528	1.33811	1	0.354411	45.8678
GOTERM_BP_FAT	GO:0007167~enzyme linked receptor protein signaling pathway	39	2.52754	0.0345452	FGFR1, TWSG1, FGF8, FUT8, CD8A, CD8B, STAT5A, FGF17, USP9X, PML, FSTL1, ADCYAP1, PHIP, CTGF, CD4, PDGFC, SHC1, SHC3, PIK3R3, FGF2, ADAM9, BMP4, CD3E, TGFBR2, SMAD5, AXL, APPL1, IRS1, STAT3, SS18, DOK2, EPHA7, PRLR, TGFBR3, BAMBI, BMPR1B, BMP7, LCP2, TOB1	1113	342	13528	1.38604	1	0.368277	47.6134
GOTERM_BP_FAT	GO:0046661~male sex differentiation	12	0.777706	0.0353403	HMGB2, SDC1, CCND1, MSH2, STAT5A, BAX, SOX2, SMAD5, DMRT2, CSDA, SHH, LGR4	1113	73	13528	1.99801	1	0.373987	48.4012
GOTERM_BP_FAT	GO:0007204~elevation of cytosolic calcium ion concentration	16	1.03694	0.0353956	IBTK, PTPRC, CCR1, LPAR1, FZD2, CXCR3, EDNRB, CD38, S1PR1, CCR5, CXCR4, CCR3, LCK, TRPV4, XCR1, F2R	1113	110	13528	1.76793	1	0.373404	48.4555
GOTERM_BP_FAT	GO:0007565~female pregnancy	16	1.03694	0.0353956	KLF9, STAT5A, TGFBR2, FCGRT, IDO1, JUNB, ADCYAP1, APOL2, CD38, THBD, PRLR, SP3, GRN, CLIC5, IGFBP2, PLAU	1113	110	13528	1.76793	1	0.373404	48.4555
GOTERM_BP_FAT	GO:0001755~neural crest cell migration	6	0.388853	0.0359828	NRP2, FGF19, SMO, EDNRB, PAX3, SHH	1113	23	13528	3.17075	1	0.377282	49.0295
GOTERM_BP_FAT	GO:0002088~lens development in camera-type eye	6	0.388853	0.0359828	BMP4, SOX1, SOX2, PYGO2, SIX5, NHS	1113	23	13528	3.17075	1	0.377282	49.0295
GOTERM_BP_FAT	GO:0016339~calcium-dependent cell-cell adhesion	6	0.388853	0.0359828	PCDHB5, PCDHB3, PCDHB14, CDH2, PCDHB11, PCDHB10	1113	23	13528	3.17075	1	0.377282	49.0295
GOTERM_BP_FAT	GO:0001779~natural killer cell differentiation	3	0.194426	0.0362115	IKZF1, SP3, STAT5A	1113	4	13528	9.1159	1	0.378138	49.2514
GOTERM_BP_FAT	GO:0032367~intracellular cholesterol transport	3	0.194426	0.0362115	NPC2, VPS4B, ABCA1	1113	4	13528	9.1159	1	0.378138	49.2514
GOTERM_BP_FAT	GO:0045091~regulation of retroviral genome replication	3	0.194426	0.0362115	APOBEC3G, APOBEC3F, TOP2A	1113	4	13528	9.1159	1	0.378138	49.2514
GOTERM_BP_FAT	GO:0032366~intracellular sterol transport	3	0.194426	0.0362115	NPC2, VPS4B, ABCA1	1113	4	13528	9.1159	1	0.378138	49.2514
GOTERM_BP_FAT	GO:0021938~smoothened signaling pathway involved in regulation of granule cell precursor cell proliferation	3	0.194426	0.0362115	SMO, GLI2, SHH	1113	4	13528	9.1159	1	0.378138	49.2514
GOTERM_BP_FAT	GO:0048667~cell morphogenesis involved in neuron differentiation	26	1.68503	0.0367975	NRP2, S100A6, PARD3, GLI2, SHH, ALCAM, ATOH1, CXCR4, KAL1, POU4F3, ROBO3, RUNX3, ETV4, NKX2-8, OTX2, GAS1, NTN1, VASP, SEMA6A, NCAM2, EPHA7, ISL2, CLIC5, DLX5, BMP7, BMPR1B	1113	209	13528	1.51205	1	0.381937	49.8159
GOTERM_BP_FAT	GO:0002440~production of molecular mediator of immune response	7	0.453662	0.0378675	EXO1, PTPRC, NOD2, LAX1, SWAP70, MSH2, IL7R	1113	31	13528	2.74457	1	0.389627	50.8312
GOTERM_BP_FAT	GO:0009306~protein secretion	7	0.453662	0.0378675	PLDN, LYN, LAX1, ABCA1, PDIA4, LCP2, CXCL10	1113	31	13528	2.74457	1	0.389627	50.8312
GOTERM_BP_FAT	GO:0002455~humoral immune response mediated by circulating immunoglobulin	7	0.453662	0.0378675	C1QA, EXO1, C1QB, C1RL, C1R, SERPING1, C1QC	1113	31	13528	2.74457	1	0.389627	50.8312
GOTERM_BP_FAT	GO:0009952~anterior/posterior pattern formation	19	1.23137	0.0381543	FOXA2, GLI3, TCF7L1, SHH, HOXB3, HOXB4, MIB1, HOXD8, HOXA3, CYP26C1, HOXA4, BTG2, HOXB7, HOXB8, HOXA6, HOXB6, LRP6, PBX3, POFUT1	1113	140	13528	1.64954	1	0.390888	51.1001
GOTERM_BP_FAT	GO:0050670~regulation of lymphocyte proliferation	13	0.842515	0.038155	PTPRC, CD3E, STAT5A, TNFRSF14, IL15, IDO1, SHH, VCAM1, CD38, CDKN2A, ZAP70, INPP5D, IL13RA1	1113	83	13528	1.90372	1	0.389836	51.1007
GOTERM_BP_FAT	GO:0007498~mesoderm development	12	0.777706	0.0385534	BMP4, SECTM1, TWSG1, IKZF3, EYA2, IKZF1, EOMES, BMP7, SHH, TCF7L1, KLF4, MEST	1113	74	13528	1.97101	1	0.391981	51.4719
GOTERM_BP_FAT	GO:0050817~coagulation	15	0.972132	0.0392298	PLDN, FOXA2, F13A1, ITGA2, STXBP3, SERPING1, LMAN1, SHH, VWF, THBD, TFPI, ENTPD2, PROS1, PLAU, F2R	1113	102	13528	1.78743	1	0.396312	52.0959
GOTERM_BP_FAT	GO:0007596~blood coagulation	15	0.972132	0.0392298	PLDN, FOXA2, F13A1, ITGA2, STXBP3, SERPING1, LMAN1, SHH, VWF, THBD, TFPI, ENTPD2, PROS1, PLAU, F2R	1113	102	13528	1.78743	1	0.396312	52.0959
GOTERM_BP_FAT	GO:0043549~regulation of kinase activity	40	2.59235	0.040795	PARD3, SNX6, TLR3, MAP4K1, PRDX3, LPAR1, CCNG1, TTN, CD74, LATS2, CDKN2A, CXCR4, ANG, HEXIM1, NPM1, TGFA, CD4, PDGFC, SHC1, SPRED1, PPAP2A, FGF2, ADAM9, FGD4, MDFI, CDC6, PTPRC, TGFBR2, HERC5, CENPE, IRS1, CDC25B, TNFRSF10A, CCND1, PRLR, CCND3, LAX1, HIPK3, CKS2, F2R	1113	357	13528	1.36185	1	0.407522	53.5109
GOTERM_BP_FAT	GO:0032944~regulation of mononuclear cell proliferation	13	0.842515	0.0413244	PTPRC, CD3E, STAT5A, TNFRSF14, IL15, IDO1, SHH, VCAM1, CD38, CDKN2A, ZAP70, INPP5D, IL13RA1	1113	84	13528	1.88106	1	0.410541	53.9805
GOTERM_BP_FAT	GO:0070663~regulation of leukocyte proliferation	13	0.842515	0.0413244	PTPRC, CD3E, STAT5A, TNFRSF14, IL15, IDO1, SHH, VCAM1, CD38, CDKN2A, ZAP70, INPP5D, IL13RA1	1113	84	13528	1.88106	1	0.410541	53.9805
GOTERM_BP_FAT	GO:0045787~positive regulation of cell cycle	10	0.648088	0.0417106	CCND1, CCND3, DLGAP5, STAT5A, TGFA, NUSAP1, BIRC5, CENPE, CALR, PGGT1B	1113	57	13528	2.13237	1	0.412432	54.3202
GOTERM_BP_FAT	GO:0006281~DNA repair	33	2.13869	0.0418362	HMGB2, SHFM1, MGMT, PML, RPS27L, RRM2B, PTTG1, OBFC2A, TYMS, FANCI, TOP2A, EXO1, ESCO1, RAD51AP1, MSH2, USP1, SMC5, BRIP1, SIRT1, SMC3, EEPD1, BRCA1, RBBP8, POLD4, RECQL, EYA4, UHRF1, EYA2, BTG2, DDB2, PCNA, PARP4, CUL4B	1113	284	13528	1.41232	1	0.41232	54.4302
GOTERM_BP_FAT	GO:0048736~appendage development	15	0.972132	0.0421126	WNT5A, CRABP2, PRRX1, COL2A1, GAS1, MBNL1, GLI3, SHH, NOTCH2, SALL4, BAX, DLX5, LRP6, FBN2, BMPR1B	1113	103	13528	1.77008	1	0.413354	54.6713
GOTERM_BP_FAT	GO:0060173~limb development	15	0.972132	0.0421126	WNT5A, CRABP2, PRRX1, COL2A1, GAS1, MBNL1, GLI3, SHH, NOTCH2, SALL4, BAX, DLX5, LRP6, FBN2, BMPR1B	1113	103	13528	1.77008	1	0.413354	54.6713
GOTERM_BP_FAT	GO:0080135~regulation of cellular response to stress	15	0.972132	0.0421126	FGF19, MDFI, LYN, USP1, MAP4K1, EDA2R, TLR3, TLR4, SIRT1, BRCA1, RPS3, NOD2, HIPK3, NPM1, FGD4	1113	103	13528	1.77008	1	0.413354	54.6713
GOTERM_BP_FAT	GO:0021513~spinal cord dorsal/ventral patterning	4	0.259235	0.0428947	SMO, GLI2, GLI3, SHH	1113	10	13528	4.86181	1	0.41819	55.3472
GOTERM_BP_FAT	GO:0042246~tissue regeneration	7	0.453662	0.0434856	NOTCH3, CCNB1, NOTCH2, GSN, NINJ1, TIMP3, PLAU	1113	32	13528	2.65881	1	0.421536	55.8515
GOTERM_BP_FAT	GO:0043200~response to amino acid stimulus	5	0.324044	0.0455368	LYN, MSH2, RPS6KB1, CDO1, TIMP3	1113	17	13528	3.57486	1	0.435531	57.5604
GOTERM_BP_FAT	GO:0050850~positive regulation of calcium-mediated signaling	5	0.324044	0.0455368	CD8A, CD3E, ZAP70, CD4, TRAT1	1113	17	13528	3.57486	1	0.435531	57.5604
GOTERM_BP_FAT	GO:0046330~positive regulation of JNK cascade	5	0.324044	0.0455368	FGF19, NOD2, TLR3, EDA2R, TLR4	1113	17	13528	3.57486	1	0.435531	57.5604
GOTERM_BP_FAT	GO:0002053~positive regulation of mesenchymal cell proliferation	5	0.324044	0.0455368	TGFBR2, PRRX1, GAS1, IRS1, SHH	1113	17	13528	3.57486	1	0.435531	57.5604
GOTERM_BP_FAT	GO:0043583~ear development	14	0.907323	0.0467538	GSC, SOX2, PRRX1, FZD3, COL2A1, GAS1, JAG1, SIX4, ATOH1, DLX5, CLIC5, SIX1, POU4F3, OTOP1	1113	95	13528	1.79119	1	0.443199	58.5446
GOTERM_BP_FAT	GO:0048858~cell projection morphogenesis	29	1.87946	0.0468955	NRP2, PARD3, S100A6, GJA1, GLI2, SHH, ALCAM, ATOH1, CXCR4, KAL1, POU4F3, ROBO3, ETV4, RUNX3, NKX2-8, OTX2, GAS1, WWTR1, NTN1, VASP, ATP7A, SMO, SEMA6A, NCAM2, EPHA7, ISL2, DLX5, BMP7, BMPR1B	1113	245	13528	1.4387	1	0.443114	58.6578
GOTERM_BP_FAT	GO:0001570~vasculogenesis	8	0.518471	0.0476594	ZFP36L1, SMO, AGGF1, HEY2, TGFBR2, SOX17, SHH, JUNB	1113	41	13528	2.37162	1	0.447431	59.2629
GOTERM_BP_FAT	GO:0051092~positive regulation of NF-kappaB transcription factor activity	8	0.518471	0.0476594	NOD2, MTDH, NPM1, TGFBR3, TLR3, EDA2R, TLR4, PRDX3	1113	41	13528	2.37162	1	0.447431	59.2629
GOTERM_BP_FAT	GO:0009719~response to endogenous stimulus	44	2.85159	0.0490729	HMGB2, STAT5A, GNG11, RPS6KB1, AURKA, TIMP3, SHH, LATS2, PHIP, ANG, HMOX1, SHC1, LOX, PIK3R3, ADAM9, BMP4, PNLIPRP1, LYN, SOCS3, MSH2, HCLS1, BCKDHB, SOCS1, TGFBR2, ITGA2, CDO1, APPL1, STAT1, IRS1, JUNB, BRCA1, STAT3, C1QB, CD38, CCND1, SDC1, KRT19, BTG2, TGFBR3, CA4, CA2, IGFBP2, STEAP2, BMP7	1113	405	13528	1.32049	1	0.456205	60.3606
GOTERM_BP_FAT	GO:0060284~regulation of cell development	25	1.62022	0.0495092	FOXA2, SOX2, REST, CDH2, GLI2, CALR, SHH, ATOH1, FGF2, ASPM, BMP4, B4GALT1, LYN, FOXA1, NTN1, NOTCH3, MIB1, SMO, ISL2, BAX, SIX1, TGFBR3, TGIF1, BMP7, ZFHX3	1113	205	13528	1.48226	1	0.458112	60.6938
GOTERM_BP_FAT	GO:0015914~phospholipid transport	7	0.453662	0.0495985	NPC2, ATP8B1, APOC1, CETP, ABCA1, ATP11C, ATP8B3	1113	33	13528	2.57824	1	0.457624	60.7616
GOTERM_BP_FAT	GO:0001709~cell fate determination	7	0.453662	0.0495985	BMP4, NOTCH2, ATOH1, MCL1, TBX2, JAG1, KLF4	1113	33	13528	2.57824	1	0.457624	60.7616
GOTERM_BP_FAT	GO:0010948~negative regulation of cell cycle process	6	0.388853	0.0496376	MAD2L1, BUB1, TTK, CENPE, GAS1, BRCA1	1113	25	13528	2.91709	1	0.456796	60.7913
GOTERM_BP_FAT	GO:0001910~regulation of leukocyte mediated cytotoxicity	6	0.388853	0.0496376	PTPRC, STAT5A, KLRK1, IL7R, LAG3, B2M	1113	25	13528	2.91709	1	0.456796	60.7913
