# Supplementary material for: Whole Exome- and mRNA-Sequencing of an AT/RT Case Reveals Few Somatic Mutations and Several Deregulated Signalling Pathways in the Context of SMARCB1 Deficiency
Source: Biomed Res Int. 2015 Aug 12;2015:862039. doi: 10.1155/2015/862039 (PMC4780067; doi:10.1155/2015/862039)
Supplement: Supplementary file 1 — Supl. Table 1A. Read mapping and coverage data. Exome-seq Data. Supl. Table 1B. Read mapping mRNA-seq data. Supl. Table 2. Germline variants with RNA variants and DE genes indicated. Supl. Table 3. Cuffdiff results, significantly DE genes with BMP-genes indicated. Supl. Table 4. Gene set overlap for up regulated genes. Supl. Table 5. Gene set overlap for down regulated genes. Supl. Table 6. GO for up regulated genes. Supl. Table 7. GO for down regulated genes. Supl. Fig. 1. FPKM values for the two CCDS SMARCB1 transcripts for AT/RT and Controls. NCBI accession nomenclature is used. Supl. Fig. 2. RNA reads alignment at exon 2 of SMARCB1. Genomic region Chr. 22: 24134055- 24134081 is indicated between the two red vertical lines. The yellow region on the top, represents exon 2, with introns on both sides, shown in blue. Aligned paired reads are shown in blue, while single reads are shown in red or green. Dotted lines connect each end of a read, that have been mapped across exon-exon boundaries. [file 862039.f1.zip › 862039 supl table 7 GO down (1).xlsx]

## Sheet: GO down
Category	Term	Count	%	PValue	Genes	List Total	Pop Hits	Pop Total	Fold Enrichment	Bonferroni	Benjamini	FDR
GOTERM_BP_FAT	GO:0019226~transmission of nerve impulse	119	6.71937	1.93272e-38	SEPT5, SYT1, KCNC4, SLC6A1, SYT4, GABRB3, SYT5, GABRB2, GRIK2, GRIK4, SNCA, GRIK5, VIPR1, ADORA1, CTTNBP2, GRIN2C, GRIN2D, CHRNA4, LGI4, KCND2, SCN2B, KIF5A, BSN, NTSR1, PCLO, CTNNA2, CBLN1, DOC2A, CAMK4, CARTPT, UNC13C, KCNMB4, RAD21L1, ACHE, SCN1B, DRD2, KCNA1, CACNB2, CACNB4, RIMS1, KCNMB2, DMD, GABRD, GABRA2, GABRA3, CPNE6, MAOA, SPTBN4, GRIN1, GABRA5, LIN7B, P2RX7, NPY, TMOD2, CACNA1E, CHRNB…	1244	350	13528	3.69736	6.34126e-35	6.34126e-35	3.5149e-35
GOTERM_BP_FAT	GO:0007268~synaptic transmission	108	6.09825	9.87926e-38	SEPT5, SYT1, KCNC4, SLC6A1, GABRB3, SYT4, SYT5, GABRB2, GRIK2, GRIK4, SNCA, GRIK5, VIPR1, ADORA1, CTTNBP2, GRIN2C, GRIN2D, CHRNA4, KCND2, SCN2B, KIF5A, BSN, NTSR1, PCLO, CTNNA2, CBLN1, DOC2A, CAMK4, CARTPT, UNC13C, KCNMB4, ACHE, RAD21L1, SCN1B, DRD2, KCNA1, CACNB2, CACNB4, RIMS1, DMD, GABRD, GABRA2, GABRA3, CPNE6, MAOA, GABRA5, GRIN1, LIN7B, P2RX7, NPY, TMOD2, CACNA1E, CHRNB2, RIT2, CACNA1C, CACN…	1244	298	13528	3.94113	3.24138e-34	1.62069e-34	1.79667e-34
GOTERM_BP_FAT	GO:0007267~cell-cell signaling	144	8.131	5.32848e-28	SEPT5, SYT1, EDN3, KCNC4, SLC6A1, SYT4, GABRB3, SYT5, FGF14, GABRB2, GRIK2, GRIK4, SNCA, EFNA3, GRIK5, FGF13, FGF12, VIPR1, VIPR2, ADORA1, CTTNBP2, GRIN2C, GRIN2D, IL1B, CHRNA4, RAPGEF4, KCND2, SCN2B, EFNB3, KIF5A, BSN, NTSR1, PCLO, CTNNA2, GRB10, SSTR2, CBLN1, DOC2A, CAMK4, SSTR1, CARTPT, EFNA4, UNC13C, KCNMB4, RAD21L1, FGFR4, ACHE, GAL3ST4, SCN1B, DRD2, KCNA1, CACNB2, CACNB4, TRH, RIMS1, INS, D…	1244	600	13528	2.6099	1.74827e-24	5.82758e-25	9.69052e-25
GOTERM_BP_FAT	GO:0006811~ion transport	166	9.37324	8.78756e-27	KCNC2, SLC22A17, KCNC1, ATP1B1, KCNC4, SLC9A6, GABRB3, SLC9A5, GRIK2, SCN3B, ATP1B2, GABRB2, GRIK3, GRIK4, GRIK5, GRIN3A, CNGB1, AQP1, ATP2B2, CTTNBP2, ATP2B3, KCNK9, GRIN2C, GRIN2D, CHRNA4, SLCO1C1, NALCN, SLC4A4, GRID1, KCND2, SCN2B, SCN2A, KCNT1, KCNT2, RYR1, RYR2, AKAP7, SLC30A10, ADD2, KCNMB4, FXYD2, SLC38A3, SCN1B, DRD2, KCNA2, KCNA1, SFXN3, CACNB1, CACNB2, CACNB3, CACNB4, ATP6V1B2, FXYD6, …	1244	768	13528	2.3505	2.8832e-23	7.208e-24	1.59813e-23
GOTERM_BP_FAT	GO:0030001~metal ion transport	116	6.54997	4.7325e-24	KCNC2, KCNC1, ATP1B1, KCNC4, SLC9A6, SLC9A5, ATP1B2, SCN3B, GRIN3A, ATP2B2, ATP2B3, KCNK9, CHRNA4, NALCN, SLC4A4, KCND2, SCN2B, SCN2A, KCNT1, KCNT2, RYR1, RYR2, SLC30A10, KCNMB4, FXYD2, SLC38A3, SCN1B, DRD2, KCNA2, KCNA1, CACNB1, SFXN3, CACNB2, CACNB3, CACNB4, SFXN5, KCNMB2, SCN9A, SLC30A3, HCN4, HCN3, HCN1, CACNA2D1, TRPC3, KCNB1, GRIN1, CACNA1I, CACNA2D3, KCNK2, KCNK4, KCNJ4, P2RX7, SLC4A10, KC…	1244	465	13528	2.7128	1.55273e-20	3.10547e-21	8.60665e-21
GOTERM_BP_FAT	GO:0006812~cation transport	120	6.77583	1.6295e-19	KCNC2, KCNC1, ATP1B1, KCNC4, SLC9A6, SLC9A5, ATP1B2, SCN3B, GRIN3A, AQP1, ATP2B2, ATP2B3, KCNK9, CHRNA4, NALCN, SLC4A4, KCND2, SCN2B, SCN2A, KCNT1, KCNT2, RYR1, RYR2, SLC30A10, KCNMB4, FXYD2, SLC38A3, SCN1B, DRD2, KCNA2, KCNA1, CACNB1, SFXN3, CACNB2, CACNB3, CACNB4, ATP6V1B2, ATP6V0B, SFXN5, KCNMB2, SCN9A, SLC30A3, HCN4, HCN3, HCN1, CACNA2D1, TRPC3, KCNB1, GRIN1, CACNA1I, CACNA2D3, KCNK2, KCNK4, …	1244	553	13528	2.35977	5.3464e-16	8.91066e-17	2.96346e-16
GOTERM_BP_FAT	GO:0044057~regulation of system process	80	4.51722	9.41815e-18	EDN3, HRAS, LZTS1, CYP2J2, THRA, SLC6A1, THRB, GRIK2, INS-IGF2, GRIK3, SNCA, BCAN, CSPG5, SYNGR1, KCNIP2, VGF, ADORA1, SYP, ATP2B2, KCNQ4, SLC1A3, GRIN2C, GRIN2D, GUCY1A3, IL1B, LGI1, KCNMA1, STX1A, ARC, STXBP1, GRM1, TNNT2, INHBA, GRM3, SSTR2, CHRM3, CHRM2, RASGRF1, RYR2, CELF2, CARTPT, PEBP1, CNTN4, TF, CPLX3, KCNMB4, PRKCZ, PPFIA3, RAB3A, ACHE, DRD2, CTNND2, PXK, KIT, FKBP1B, KCNMB2, BCHE, INS…	1244	309	13528	2.81543	3.0901e-14	4.41442e-15	1.71281e-14
GOTERM_BP_FAT	GO:0006836~neurotransmitter transport	38	2.14568	1.8575e-17	SEPT5, PPFIA3, SYT1, RAB3A, CPLX3, RAD21L1, CPLX2, CPLX1, SLC6A1, SYT4, RIMS1, RIMS4, RIMS3, SLC32A1, SLC1A3, HRH3, SYN2, SNPH, SV2B, SV2A, SNAP25, STX1A, GABRA2, ICA1, SLC6A11, NRXN3, SLC6A12, SLC6A13, LIN7B, SLC6A15, ATP1A2, PCLO, STX1B, SLC17A7, GRM4, P2RX7, DOC2A, GRM2, CACNA1A	1244	83	13528	4.97873	6.09445e-14	7.61806e-15	3.3781e-14
GOTERM_BP_FAT	GO:0030182~neuron differentiation	98	5.5336	5.86546e-17	GPRIN1, EDN3, PLXNA3, TUBB2A, JAG2, RORB, GRIN3A, KLHL1, NRCAM, ATP2B2, MC1R, UNC5A, LGI4, ROBO2, OLIG1, EFNB3, STMN3, EMX1, STMN2, BAIAP2, PICK1, KIF5C, MDGA2, PTPRR, TBR1, THY1, CTNNA2, SLITRK2, SLITRK1, SLITRK4, RND1, SLITRK3, RASGRF1, FOXG1, C1ORF187, KALRN, CDK5R1, DRD2, CLU, RAC3, LHX2, DMD, NGRN, BAI1, LHX6, OLFM3, KLF7, SPTBN4, CELSR3, CELSR2, GAS7, SALL3, DLX1, SEMA6C, S100B, ULK2, NTRK2…	1244	438	13528	2.43313	3.64264e-13	4.05231e-14	1.9984e-13
GOTERM_BP_FAT	GO:0050804~regulation of synaptic transmission	48	2.71033	1.79558e-16	PRKCZ, PPFIA3, KCNMB4, RAB3A, EDN3, CPLX3, HRAS, ACHE, LZTS1, SLC6A1, DRD2, GRIK2, GRIK3, SNCA, CTNND2, BCAN, PXK, KIT, CSPG5, SYNGR1, VGF, ADORA1, SYP, ATP2B2, KCNQ4, SLC1A3, BCHE, GRIN2C, AGT, PPP3CA, LGI1, CAMK2A, ARC, STX1A, NCDN, GRIN1, STXBP1, NLGN2, GRM1, GRM3, YWHAH, RASGRF1, NTRK2, PEBP1, CNTN4, CHRNB2, CACNA1A, HTR2A	1244	136	13528	3.83809	7.28528e-13	7.28306e-14	3.9968e-13
GOTERM_BP_FAT	GO:0051969~regulation of transmission of nerve impulse	50	2.82326	2.16939e-16	EDN3, HRAS, LZTS1, SLC6A1, GRIK2, GRIK3, SNCA, BCAN, CSPG5, SYNGR1, VGF, ADORA1, SYP, ATP2B2, KCNQ4, SLC1A3, GRIN2C, LGI1, ARC, STX1A, STXBP1, GRM1, GRM3, RASGRF1, PEBP1, CARTPT, CNTN4, PRKCZ, PPFIA3, RAB3A, KCNMB4, CPLX3, TF, ACHE, DRD2, CTNND2, KIT, PXK, BCHE, AGT, PPP3CA, CAMK2A, NCDN, GRIN1, NLGN2, YWHAH, NTRK2, CHRNB2, CACNA1A, HTR2A	1244	147	13528	3.69884	7.28528e-13	6.62803e-14	3.9968e-13
GOTERM_BP_FAT	GO:0031644~regulation of neurological system process	51	2.87973	3.79378e-16	EDN3, HRAS, LZTS1, SLC6A1, GRIK2, GRIK3, SNCA, BCAN, CSPG5, SYNGR1, VGF, ADORA1, SYP, ATP2B2, KCNQ4, SLC1A3, GRIN2C, GRIN2D, LGI1, ARC, STX1A, STXBP1, GRM1, GRM3, RASGRF1, PEBP1, CARTPT, CNTN4, PRKCZ, PPFIA3, RAB3A, KCNMB4, CPLX3, TF, ACHE, DRD2, CTNND2, KIT, PXK, BCHE, AGT, PPP3CA, CAMK2A, NCDN, GRIN1, NLGN2, YWHAH, NTRK2, CHRNB2, CACNA1A, HTR2A	1244	153	13528	3.62487	1.09279e-12	9.10383e-14	6.10623e-13
GOTERM_BP_FAT	GO:0007610~behavior	98	5.5336	9.23221e-15	EDN3, ADCY1, HRAS, PLXNA3, SLC6A1, GRIK2, ADCY8, CRHBP, SNCA, KLHL1, ATP2B2, PRKAR2B, PPP1R1B, GRIN2D, CHRNA4, IL1B, ROBO2, GNG7, EFNB3, NTSR1, RASGRF1, PDGFRB, CARTPT, DRD2, ASTN1, CACNB4, TRH, BCHE, MYO15A, CNR1, SCN9A, STRBP, MAOA, GABRA5, GRIN1, MET, SPTBN4, NR4A3, S100B, PENK, EPS8, NPY, PRKAR1B, NTRK2, ADRA1B, TMOD2, CHRNB2, CACNA1C, CACNA1A, MCHR1, TRPV1, UCHL1, SOBP, KCNIP3, SLC1A2, SLC1A…	1244	469	13528	2.2723	3.02339e-11	2.3257e-12	1.67533e-11
GOTERM_BP_FAT	GO:0048666~neuron development	79	4.46076	1.18054e-14	GPRIN1, PLXNA3, OPCML, UCHL1, PIP5K1C, RORB, GRIN3A, KCNIP2, KLHL1, NRCAM, ATP2B2, SLC1A3, UNC5A, LGI4, CNTNAP2, ROBO2, EFNB3, STMN3, NRXN3, BAIAP2, PICK1, KIF5C, STXBP1, NRXN1, TBR1, SLIT1, THY1, CTNNA2, SLITRK2, AMIGO1, SLITRK1, SLITRK4, SLITRK3, RND1, RASGRF1, FOXG1, CNTN4, C1ORF187, GAP43, KALRN, DCC, RAB3A, CDK5R1, RTN4RL1, DRD2, CLU, HPRT1, MYCBP2, LINGO1, RAC3, PTK2B, LHX2, DMD, BAI1, LHX6…	1244	339	13528	2.5342	3.8612e-11	2.75802e-12	2.14051e-11
GOTERM_BP_FAT	GO:0015674~di-, tri-valent inorganic cation transport	52	2.93619	4.07258e-14	JPH4, TRPV1, GRIN3A, ATP2B2, ATP2B3, SLN, SLC24A3, CHRNA4, LTF, CACNG8, CACNG7, CACNG4, CACNG2, PRKCB, RYR1, RYR2, TF, FTLP2, DRD2, CAMK2G, TFR2, CACNB1, SFXN3, CACNB2, FKBP1A, CACNB3, CACNB4, FKBP1B, SFXN5, CAMK2B, PPP3CA, CAMK2A, SLC8A1, CACNA2D1, SLC8A2, TRPC3, CACNA1I, GRIN1, CACNA2D3, ITPR1, ACCN2, P2RX7, NPY, FYN, CACNA1G, CACNA1H, CHRNB2, CACNA1E, HEPH, CACNA1C, CACNA1D, CACNA1A	1244	176	13528	3.21295	1.33685e-10	8.91232e-12	7.40963e-11
GOTERM_BP_FAT	GO:0007611~learning or memory	40	2.25861	4.27456e-14	PRKCZ, ADCY1, HRAS, SLC6A1, ADCY8, DRD2, CRHBP, CTNND2, KIT, AMPH, PRKAR2B, CHST10, HRH3, PDE1B, BCHE, PTN, IL1B, PLCB1, SNAP25, STS, GABRA5, GRIN1, ATP1A3, PRKCG, AFF2, ATP1A2, GRM4, S100B, FYN, RASGRF1, GRIA1, PRKAR1B, GRM7, ADRA1B, CRH, TMOD2, CHRNB2, CACNA1C, APBB1, HTR2A	1244	111	13528	3.91877	1.40242e-10	8.7651e-12	7.77378e-11
GOTERM_BP_FAT	GO:0031175~neuron projection development	65	3.67024	5.2801e-14	GPRIN1, PLXNA3, UCHL1, PIP5K1C, GRIN3A, KLHL1, NRCAM, UNC5A, ROBO2, STMN3, EFNB3, NRXN3, BAIAP2, KIF5C, STXBP1, NRXN1, TBR1, SLIT1, CTNNA2, AMIGO1, SLITRK2, SLITRK1, SLITRK4, SLITRK3, RASGRF1, FOXG1, CNTN4, C1ORF187, GAP43, KALRN, DCC, RAB3A, CDK5R1, RTN4RL1, DRD2, CLU, HPRT1, MYCBP2, LINGO1, RAC3, PTK2B, DMD, LHX2, BAI1, RTN4RL2, DCX, SNAP25, DCLK1, KLF7, GNAO1, MCF2, SPTBN4, RTN4R, NFASC, NTNG1…	1244	256	13528	2.76113	1.7339e-10	1.01994e-11	9.6112e-11
GOTERM_BP_FAT	GO:0006816~calcium ion transport	45	2.54094	1.7191e-13	JPH4, DRD2, TRPV1, CAMK2G, CACNB1, CACNB2, CACNB3, FKBP1A, GRIN3A, CACNB4, FKBP1B, ATP2B2, ATP2B3, SLN, SLC24A3, CHRNA4, CAMK2B, PPP3CA, CAMK2A, CACNA2D1, SLC8A1, TRPC3, SLC8A2, CACNG8, CACNG7, CACNA1I, GRIN1, CACNG4, CACNG2, CACNA2D3, ITPR1, PRKCB, ACCN2, P2RX7, NPY, FYN, RYR1, CACNA1G, CACNA1H, RYR2, CACNA1E, CHRNB2, CACNA1C, CACNA1D, CACNA1A	1244	142	13528	3.44618	5.63881e-10	3.13267e-11	3.1255e-10
GOTERM_BP_FAT	GO:0006813~potassium ion transport	48	2.71033	2.34771e-13	KCNC2, KCNJ16, FXYD2, KCNC1, KCNMB4, KCNC4, ATP1B1, KCNAB3, KCNAB1, ATP1B2, KCNA2, KCNA1, KCNJ10, KCNIP2, KCNJ11, KCNIP1, KCNMB2, KCNK10, KCNIP3, KCNQ4, KCNQ3, KCNK9, SLC24A3, KCNQ2, HCN4, HCN3, NSF, KCNE4, HCN1, KCNMA1, SLC12A1, KCND2, KCNB1, ATP1A3, ATP1A2, KCNK2, KCNK4, KCNJ4, KCNT1, KCNJ9, KCNN1, KCNT2, KCNN2, KCTD17, KCNF1, KCTD15, ABCC8, KCNH4	1244	160	13528	3.26238	7.70419e-10	4.05483e-11	4.27036e-10
GOTERM_BP_FAT	GO:0050877~neurological system process	186	10.5025	5.37704e-13	SEPT5, ADCY3, SYT1, HRAS, KCNC4, ADCY1, SLC6A1, SYT4, GABRB3, SYT5, ADCY8, GRIK2, GABRB2, PITPNA, CRHBP, SNCA, GRIK4, GRIK5, RORB, GRIN3A, CNGB1, VIPR1, ADORA1, KIFC3, PRKAR2B, ATP2B2, CTTNBP2, CRYGD, GRIN2C, GRIN2D, IL1B, LGI4, CHRNA4, RGR, KCND2, SCN2B, KIF5A, CDHR1, BSN, NTSR1, PCLO, CTNNA2, CBLN1, DOC2A, PITPNM3, CAMK4, RASGRF1, CARTPT, UNC13C, KCNMB4, RAD21L1, ACHE, SCN1B, DRD2, KCNA1, CACNB…	1244	1210	13528	1.67163	1.76413e-09	8.82066e-11	9.7784e-10
GOTERM_BP_FAT	GO:0007269~neurotransmitter secretion	20	1.12931	8.5101e-12	SEPT5, CPLX3, SYT1, PPFIA3, RAB3A, RAD21L1, STX1A, SYT4, NRXN3, LIN7B, PCLO, RIMS1, GRM4, P2RX7, DOC2A, GRM2, HRH3, SNPH, SYN2, SNAP25, CACNA1A	1244	34	13528	6.39682	2.79216e-08	1.3296e-09	1.54767e-08
GOTERM_BP_FAT	GO:0048812~neuron projection morphogenesis	54	3.04912	9.76177e-12	PLXNA3, UCHL1, PIP5K1C, NRCAM, UNC5A, ROBO2, EFNB3, NRXN3, BAIAP2, KIF5C, STXBP1, NRXN1, TBR1, SLIT1, CTNNA2, AMIGO1, SLITRK2, SLITRK1, SLITRK4, SLITRK3, FOXG1, CNTN4, GAP43, C1ORF187, KALRN, DCC, RAB3A, CDK5R1, RTN4RL1, DRD2, CLU, HPRT1, MYCBP2, DMD, LHX2, BAI1, RTN4RL2, DCX, SNAP25, DCLK1, KLF7, SPTBN4, NTNG1, NFASC, RTN4R, CELSR3, CELSR2, GAS7, SEMA6C, S100B, ULK2, CHRNB2, APBB1, CACNA1A	1244	213	13528	2.75694	3.20283e-08	1.45583e-09	1.7753e-08
GOTERM_BP_FAT	GO:0048667~cell morphogenesis involved in neuron differentiation	53	2.99266	1.53926e-11	PLXNA3, UCHL1, PIP5K1C, NRCAM, ATP2B2, SLC1A3, UNC5A, ROBO2, EFNB3, NRXN3, BAIAP2, KIF5C, STXBP1, NRXN1, TBR1, SLIT1, CTNNA2, AMIGO1, SLITRK2, SLITRK1, SLITRK4, SLITRK3, FOXG1, CNTN4, GAP43, C1ORF187, KALRN, DCC, RAB3A, CDK5R1, RTN4RL1, DRD2, HPRT1, MYCBP2, LHX2, BAI1, RTN4RL2, DCX, SNAP25, DCLK1, KLF7, SPTBN4, NTNG1, NFASC, RTN4R, CELSR3, CELSR2, SEMA6C, S100B, ULK2, CHRNB2, APBB1, CACNA1A	1244	209	13528	2.75767	5.0503e-08	2.19578e-09	2.79933e-08
GOTERM_BP_FAT	GO:0015672~monovalent inorganic cation transport	69	3.8961	2.2245e-11	KCNC2, KCNJ16, KCNC1, ATP1B1, KCNC4, KCNAB3, SLC9A6, SLC9A5, KCNAB1, SCN3B, ATP1B2, KCNJ10, KCNIP2, KCNJ11, KCNIP1, KCNIP3, KCNK10, KCNQ4, KCNQ3, KCNK9, SLC24A3, SLC23A2, NALCN, KCNQ2, SLC4A4, NSF, KCNMA1, KCND2, SCN2B, SCN2A, KCNT1, KCNT2, KCNH4, FXYD2, KCNMB4, SLC38A3, SCN1B, KCNA2, KCNA1, ATP6V1B2, ATP6V0B, KCNMB2, SCN9A, NEDD4L, HCN4, HCN3, KCNE4, HCN1, SLC8A1, SLC12A1, SLC8A2, KCNB1, ATP1A3,…	1244	318	13528	2.35958	7.29858e-08	3.04107e-09	4.04553e-08
GOTERM_BP_FAT	GO:0003001~generation of a signal involved in cell-cell signaling	31	1.75042	3.23256e-11	SEPT5, EDN3, RAB3A, CPLX3, SYT1, PPFIA3, RAD21L1, SYT4, CAMK2G, CACNB4, VGF, RIMS1, FKBP1B, HRH3, SNPH, SYN2, RAPGEF4, SNAP25, APBA1, STX1A, NRXN3, LIN7B, PCLO, GRM4, P2RX7, DOC2A, GRM2, NTRK2, NEUROD1, CACNA1C, SMPD3, CACNA1A	1244	85	13528	3.96603	1.0606e-07	4.24241e-09	5.87882e-08
GOTERM_BP_FAT	GO:0007242~intracellular signaling cascade	184	10.3896	5.40316e-11	ADCY3, EDN3, HRAS, ADCY1, ADCY2, THRA, RAB9B, ADCY8, ADCY5, ADCY6, RASGEF1A, RRAD, FGF13, LPAR2, VIPR1, ADORA1, GNG8, PRKAR2B, MAP3K5, DIRAS1, DIRAS2, MC1R, MAP3K9, IL1B, RAPGEF5, RAPGEF4, GNG2, GLP2R, RAB26, GNG4, DDAH1, GNG7, MAGI2, TNIK, STMN3, STMN2, CRYAB, STMN4, WNK2, PCLO, MARK1, CRHR1, SSTR2, RND1, RASGRF1, SSTR1, RAB17, MAPK9, CARTPT, AKAP7, UNC13C, GRB14, KALRN, PLCXD3, FGFR3, RALGPS1, …	1244	1256	13528	1.59309	1.77278e-07	6.81837e-09	9.82632e-08
GOTERM_BP_FAT	GO:0001505~regulation of neurotransmitter levels	27	1.52456	5.72635e-11	SEPT5, CPLX3, RAB3A, SYT1, PPFIA3, RAD21L1, ACHE, SYT4, RIMS1, SLC1A3, HRH3, SNPH, SYN2, SNAP25, GABRA2, STX1A, NRXN3, MAOA, LIN7B, ATP1A2, PCLO, SLC17A7, GRM4, P2RX7, DOC2A, GRM2, PEBP1, CACNA1A	1244	67	13528	4.3823	1.87882e-07	6.95858e-09	1.04141e-07
GOTERM_BP_FAT	GO:0030030~cell projection organization	74	4.17843	1.63496e-10	GPRIN1, PLXNA3, UCHL1, PIP5K1C, GRIN3A, MTSS1L, KLHL1, NRCAM, ATP2B2, UNC5A, ROBO2, EFNB3, STMN3, NRXN3, BAIAP2, KIF5C, STXBP1, ACTN2, NRXN1, TBR1, SLIT1, CTNNA2, SLITRK2, AMIGO1, SLITRK1, SLITRK4, SLITRK3, SPAG6, RASGRF1, FOXG1, CNTN4, C1ORF187, GAP43, KALRN, DCC, RAB3A, CDK5R1, RTN4RL1, DRD2, CLU, HPRT1, MYCBP2, LINGO1, RAC3, PTK2B, LHX2, DMD, BAI1, TEKT2, RTN4RL2, DCX, SNAP25, DCLK1, KLF7, GNA…	1244	368	13528	2.18674	5.36431e-07	1.91582e-08	2.97338e-07
GOTERM_BP_FAT	GO:0000904~cell morphogenesis involved in differentiation	56	3.16206	2.37832e-10	PLXNA3, UCHL1, PIP5K1C, NRCAM, ATP2B2, SLC1A3, UNC5A, ROBO2, EFNB3, NRXN3, BAIAP2, KIF5C, STXBP1, LEF1, NRXN1, TBR1, SLIT1, PROX1, CTNNA2, AMIGO1, SLITRK2, SLITRK1, SLITRK4, SLITRK3, FOXG1, CNTN4, GAP43, C1ORF187, KALRN, DCC, RAB3A, CDK5R1, RTN4RL1, DRD2, HPRT1, MYCBP2, LHX2, BAI1, RTN4RL2, DCX, SNAP25, DCLK1, KLF7, BMP2, SPTBN4, NTNG1, NFASC, RTN4R, CELSR3, CELSR2, SEMA6C, S100B, ULK2, CHRNB2, A…	1244	244	13528	2.49581	7.80327e-07	2.69078e-08	4.32528e-07
GOTERM_BP_FAT	GO:0048858~cell projection morphogenesis	56	3.16206	2.79975e-10	PLXNA3, UCHL1, PIP5K1C, NRCAM, UNC5A, ROBO2, EFNB3, NRXN3, BAIAP2, KIF5C, STXBP1, NRXN1, TBR1, SLIT1, CTNNA2, AMIGO1, SLITRK2, SLITRK1, SLITRK4, SLITRK3, FOXG1, CNTN4, GAP43, C1ORF187, KALRN, DCC, RAB3A, CDK5R1, RTN4RL1, DRD2, CLU, HPRT1, MYCBP2, DMD, LHX2, BAI1, RTN4RL2, DCX, SNAP25, DCLK1, KLF7, PCNT, SPTBN4, NTNG1, NFASC, RTN4R, CELSR3, CELSR2, GAS7, SEMA6C, S100B, ULK2, IFT172, CHRNB2, APBB1,…	1244	245	13528	2.48562	9.18598e-07	3.062e-08	5.0917e-07
GOTERM_BP_FAT	GO:0007409~axonogenesis	48	2.71033	3.20596e-10	DCC, RAB3A, CDK5R1, PLXNA3, RTN4RL1, DRD2, UCHL1, PIP5K1C, MYCBP2, NRCAM, UNC5A, LHX2, BAI1, ROBO2, RTN4RL2, DCX, SNAP25, DCLK1, KLF7, EFNB3, NRXN3, BAIAP2, SPTBN4, KIF5C, RTN4R, NFASC, NTNG1, STXBP1, CELSR3, NRXN1, TBR1, SLIT1, CTNNA2, AMIGO1, SLITRK2, SLITRK1, SLITRK4, SLITRK3, SEMA6C, S100B, ULK2, FOXG1, CHRNB2, CNTN4, APBB1, C1ORF187, GAP43, KALRN	1244	193	13528	2.70456	1.05188e-06	3.39315e-08	5.83045e-07
GOTERM_BP_FAT	GO:0032940~secretion by cell	50	2.82326	3.87268e-10	SEPT5, EDN3, SYT1, SYT4, SRCIN1, SYT6, VGF, STXBP5L, ANK1, SNPH, RAPGEF4, SCAMP5, STX1A, NRXN3, STXBP1, PCLO, GRM4, DOC2A, TRIM36, GRM2, STXBP5, UNC13C, ARL4D, MON1A, PPFIA3, RAB3A, CPLX3, CPLX2, RAD21L1, CPLX1, CAMK2G, PEX5L, RIMS1, FKBP1B, RIMS4, RIMS3, HRH3, GNPTAB, ROPN1B, SYN2, SNAP25, APBA1, SCG2, GLRB, LIN7B, P2RX7, NTRK2, NEUROD1, CACNA1C, CACNA1A, SMPD3	1244	207	13528	2.62671	1.27063e-06	3.97071e-08	7.04296e-07
GOTERM_BP_FAT	GO:0046903~secretion	63	3.55731	7.38484e-10	SEPT5, SYT1, EDN3, SYT4, SRCIN1, TRPV1, AQP4, SYT6, AQP1, VGF, ADORA1, STXBP5L, SCT, ANK1, SNPH, RAPGEF4, SCAMP5, KCNMA1, STX1A, NRXN3, STXBP1, PCLO, GRM4, DOC2A, GRM2, TRIM36, STXBP5, UNC13C, ARL4D, PLA2G5, MON1A, CLDN16, PPFIA3, RAB3A, CPLX3, RAD21L1, CPLX2, CPLX1, DRD2, CAMK2G, CACNB4, FKBP1B, RIMS1, PEX5L, RIMS4, RIMS3, GNPTAB, HRH3, ROPN1B, AGT, SYN2, NEDD4L, SNAP25, APBA1, SCG2, GLRB, LIN7B…	1244	300	13528	2.28367	2.42296e-06	7.34232e-08	1.34303e-06
GOTERM_BP_FAT	GO:0031280~negative regulation of cyclase activity	23	1.2987	8.67316e-10	GNAZ, ADCY3, PALM, MCHR1, ADCY1, ADCY2, OPRL1, DRD2, ADCY8, GNAI1, ADCY5, ADCY6, NPY1R, GABBR2, ADORA1, GRM4, GNAL, GRM3, SSTR2, GRM2, HRH3, GRM7, ADRA2A	1244	55	13528	4.54756	2.84566e-06	8.3696e-08	1.57732e-06
GOTERM_BP_FAT	GO:0051350~negative regulation of lyase activity	23	1.2987	8.67316e-10	GNAZ, ADCY3, PALM, MCHR1, ADCY1, ADCY2, OPRL1, DRD2, ADCY8, GNAI1, ADCY5, ADCY6, NPY1R, GABBR2, ADORA1, GRM4, GNAL, GRM3, SSTR2, GRM2, HRH3, GRM7, ADRA2A	1244	55	13528	4.54756	2.84566e-06	8.3696e-08	1.57732e-06
GOTERM_BP_FAT	GO:0007194~negative regulation of adenylate cyclase activity	23	1.2987	8.67316e-10	GNAZ, ADCY3, PALM, MCHR1, ADCY1, ADCY2, OPRL1, DRD2, ADCY8, GNAI1, ADCY5, ADCY6, NPY1R, GABBR2, ADORA1, GRM4, GNAL, GRM3, SSTR2, GRM2, HRH3, GRM7, ADRA2A	1244	55	13528	4.54756	2.84566e-06	8.3696e-08	1.57732e-06
GOTERM_BP_FAT	GO:0007612~learning	24	1.35517	9.78434e-10	HRAS, SLC6A1, DRD2, GABRA5, GRIN1, CTNND2, ATP1A3, ATP1A2, KIT, AMPH, GRM4, PRKAR2B, CHST10, PDE1B, HRH3, BCHE, FYN, GRM7, ADRA1B, PTN, CHRNB2, PLCB1, CACNA1C, APBB1	1244	60	13528	4.34984	3.21024e-06	9.17212e-08	1.77941e-06
GOTERM_BP_FAT	GO:0030534~adult behavior	29	1.63749	1.23815e-09	DRD2, SNCA, UCHL1, CACNB4, TRH, KLHL1, SLC1A2, GRIN2D, CHRNA4, KCNMA1, GABRG2, GLRB, EFNB3, GRIN1, MET, SPTBN4, ATP1A3, ATP1A2, NR4A3, NTSR1, GRM2, NPY, EPS8, GRM7, ADRA1B, CARTPT, CHRNB2, CACNA1C, CACNA1A	1244	86	13528	3.66702	4.06237e-06	1.12844e-07	2.25174e-06
GOTERM_BP_FAT	GO:0000902~cell morphogenesis	70	3.95257	1.47661e-09	PLXNA3, UCHL1, PIP5K1C, NRCAM, ATP2B2, ANK1, SLC1A3, UNC5A, ROBO2, ARHGEF2, EFNB3, NRXN3, BAIAP2, KIF5C, STXBP1, LEF1, NRXN1, PROX1, TBR1, SLIT1, CTNNA2, SLITRK2, AMIGO1, SLITRK1, SLITRK4, SLITRK3, FOXG1, CNTN4, C1ORF187, GAP43, KALRN, DCC, RAB3A, CDK5R1, SHROOM2, RTN4RL1, DRD2, CLU, BRSK2, BRSK1, HPRT1, MYCBP2, LHX2, DMD, BAI1, RTN4RL2, DCX, SNAP25, DCLK1, KLF7, BMP2, CAP2, PCNT, SPTBN4, RTN4R, …	1244	356	13528	2.13826	4.84473e-06	1.30939e-07	2.6854e-06
GOTERM_BP_FAT	GO:0032990~cell part morphogenesis	56	3.16206	1.56221e-09	PLXNA3, UCHL1, PIP5K1C, NRCAM, UNC5A, ROBO2, EFNB3, NRXN3, BAIAP2, KIF5C, STXBP1, NRXN1, TBR1, SLIT1, CTNNA2, AMIGO1, SLITRK2, SLITRK1, SLITRK4, SLITRK3, FOXG1, CNTN4, GAP43, C1ORF187, KALRN, DCC, RAB3A, CDK5R1, RTN4RL1, DRD2, CLU, HPRT1, MYCBP2, DMD, LHX2, BAI1, RTN4RL2, DCX, SNAP25, DCLK1, KLF7, PCNT, SPTBN4, NTNG1, NFASC, RTN4R, CELSR3, CELSR2, GAS7, SEMA6C, S100B, ULK2, IFT172, CHRNB2, APBB1,…	1244	256	13528	2.37882	5.1256e-06	1.34885e-07	2.84108e-06
GOTERM_BP_FAT	GO:0051046~regulation of secretion	46	2.5974	1.50641e-08	SEPT5, SYT1, KCNMB4, RAB3A, EDN3, CPLX3, ACHE, RAB3C, INS-IGF2, DRD2, NNAT, SNCA, NCS1, TRH, ADORA1, KCNJ11, HRH3, INS, SAA1, AGT, CHRNA4, IL1B, RAPGEF4, RAB26, NRG1, CAMK2A, SNAP25, NSF, SCAMP5, STX1A, STXBP1, IGF2, NPY1R, PCLO, STX1B, INHBA, P2RX7, DOC2A, GCK, GRM7, NTRK2, CRH, CARTPT, NEUROD1, CHRNB2, AACS, CACNA1A, HTR2A	1244	202	13528	2.47639	4.94242e-05	1.26732e-06	2.7396e-05
GOTERM_BP_FAT	GO:0048167~regulation of synaptic plasticity	23	1.2987	2.38385e-08	PPFIA3, HRAS, ARC, LZTS1, NCDN, DRD2, GRIK2, SNCA, GRIN1, CTNND2, BCAN, KIT, SYNGR1, VGF, ADORA1, SYP, ATP2B2, YWHAH, GRIN2C, RASGRF1, AGT, CNTN4, CAMK2A	1244	64	13528	3.90806	7.82109e-05	1.95535e-06	4.33532e-05
GOTERM_BP_FAT	GO:0032989~cellular component morphogenesis	72	4.0655	2.86208e-08	PLXNA3, UCHL1, PIP5K1C, NRCAM, ATP2B2, ANK1, SLC1A3, UNC5A, ROBO2, ARHGEF2, EFNB3, NRXN3, BAIAP2, KIF5C, STXBP1, LEF1, NRXN1, PROX1, TBR1, SLIT1, CTNNA2, SLITRK2, AMIGO1, TNNT2, SLITRK1, SLITRK4, SLITRK3, FOXG1, CNTN4, C1ORF187, GAP43, KALRN, DCC, RAB3A, CDK5R1, SHROOM2, RTN4RL1, DRD2, CLU, BRSK2, BRSK1, HPRT1, MYCBP2, LHX2, DMD, BAI1, RTN4RL2, DCX, SNAP25, DCLK1, ACTC1, KLF7, BMP2, CAP2, PCNT, S…	1244	397	13528	1.97222	9.39004e-05	2.29036e-06	5.20505e-05
GOTERM_BP_FAT	GO:0007155~cell adhesion	109	6.15471	3.62459e-08	DLC1, CADM3, THRA, NELL1, NELL2, LMO7, EDIL3, CDH22, NRCAM, CDH20, COL12A1, ROBO2, CDH24, TYRO3, F11R, CDHR1, COL22A1, ACTN2, PTPRT, AJAP1, SIRPA, THY1, CTNNA2, NCAM1, PODXL2, HEPACAM, HAS1, ACHE, CDK5R1, PCDH20, ASTN1, ITGBL1, LAMB3, BAI1, PPFIBP1, CELSR3, ITGA3, CELSR2, PCDH17, COL16A1, PCDH19, LAMA1, ITGA7, ADAM22, PDZD2, COL20A1, AEBP1, OPCML, CLSTN3, MYBPC1, TLN2, NPNT, CLDN5, BCAN, SDC3, BA…	1244	700	13528	1.69333	0.000118916	2.83149e-06	6.59178e-05
GOTERM_BP_FAT	GO:0022610~biological adhesion	109	6.15471	3.97907e-08	DLC1, CADM3, THRA, NELL1, NELL2, LMO7, EDIL3, CDH22, NRCAM, CDH20, COL12A1, ROBO2, CDH24, TYRO3, F11R, CDHR1, COL22A1, ACTN2, PTPRT, AJAP1, SIRPA, THY1, CTNNA2, NCAM1, PODXL2, HEPACAM, HAS1, ACHE, CDK5R1, PCDH20, ASTN1, ITGBL1, LAMB3, BAI1, PPFIBP1, CELSR3, ITGA3, CELSR2, PCDH17, COL16A1, PCDH19, LAMA1, ITGA7, ADAM22, PDZD2, COL20A1, AEBP1, OPCML, CLSTN3, MYBPC1, TLN2, NPNT, CLDN5, BCAN, SDC3, BA…	1244	701	13528	1.69091	0.000130545	3.03611e-06	7.23643e-05
GOTERM_BP_FAT	GO:0048489~synaptic vesicle transport	16	0.903444	5.45526e-08	SEPT5, RAB3A, CPLX3, RAD21L1, STX1A, SNCA, STXBP1, PCLO, RIMS1, AMPH, SYP, P2RX7, DOC2A, SNPH, BIN1, SNAP25, SH3GL2	1244	33	13528	5.27253	0.000178971	4.06788e-06	9.92107e-05
GOTERM_BP_FAT	GO:0045761~regulation of adenylate cyclase activity	28	1.58103	8.04408e-08	ADCY3, GNAZ, MCHR1, PALM, ADCY1, ADCY2, DRD2, ADCY8, GNAI1, ADCY5, ADCYAP1R1, ADCY6, GABBR2, ADORA1, GPR3, HRH3, ADRA2A, CAP2, OPRL1, NPY1R, CRHR1, GRM4, GNAL, SSTR2, GRM3, GRM2, GRM7, NTRK2	1244	96	13528	3.17176	0.000263892	5.86501e-06	0.000146292
GOTERM_BP_FAT	GO:0030814~regulation of cAMP metabolic process	29	1.63749	1.03012e-07	GNAZ, ADCY3, MCHR1, PALM, ADCY1, ADCY2, DRD2, ADCY8, GNAI1, ADCY5, ADCYAP1R1, ADCY6, GABBR2, TIMP2, ADORA1, GPR3, HRH3, ADRA2A, CAP2, OPRL1, NPY1R, CRHR1, GRM4, GNAL, SSTR2, GRM3, GRM2, GRM7, NTRK2	1244	103	13528	3.06178	0.000337926	7.34742e-06	0.00018734
GOTERM_BP_FAT	GO:0031279~regulation of cyclase activity	28	1.58103	1.61351e-07	ADCY3, GNAZ, MCHR1, PALM, ADCY1, ADCY2, DRD2, ADCY8, GNAI1, ADCY5, ADCYAP1R1, ADCY6, GABBR2, ADORA1, GPR3, HRH3, ADRA2A, CAP2, OPRL1, NPY1R, CRHR1, GRM4, GNAL, SSTR2, GRM3, GRM2, GRM7, NTRK2	1244	99	13528	3.07564	0.000529253	1.12636e-05	0.000293437
GOTERM_BP_FAT	GO:0060341~regulation of cellular localization	50	2.82326	1.94831e-07	SEPT5, EDN3, SYT1, INS-IGF2, SNCA, NCS1, ADORA1, KCNJ11, SAA1, CHRNA4, IL1B, RAPGEF4, RAB26, NSF, SCAMP5, STX1A, CRYAB, STXBP1, STX1B, PKIA, PCLO, INHBA, DOC2A, GRM7, CARTPT, RYR2, RAB3A, KCNMB4, CPLX3, ACHE, RAB3C, DRD2, NNAT, TRH, FKBP1B, HRH3, INS, AGT, CAMK2A, SNAP25, IGF2, NPY1R, P2RX7, GCK, NTRK2, CRH, NEUROD1, CALM3, CHRNB2, AACS, CACNA1A, CALM1, HTR2A	1244	248	13528	2.19246	0.000639037	1.33174e-05	0.000354325
GOTERM_BP_FAT	GO:0048168~regulation of neuronal synaptic plasticity	16	0.903444	2.246e-07	PPFIA3, HRAS, ARC, NCDN, DRD2, GRIK2, SNCA, GRIN1, BCAN, KIT, SYNGR1, VGF, SYP, RASGRF1, AGT, CAMK2A	1244	36	13528	4.83315	0.000736642	1.50389e-05	0.000408463
GOTERM_BP_FAT	GO:0030799~regulation of cyclic nucleotide metabolic process	30	1.69396	2.37549e-07	GNAZ, ADCY3, MCHR1, PALM, ADCY1, ADCY2, DRD2, ADCY8, GNAI1, ADCY5, ADCYAP1R1, ADCY6, GABBR2, TIMP2, ADORA1, GPR3, HRH3, ADRA2A, GUCY1A3, CAP2, OPRL1, NPY1R, CRHR1, GRM4, GNAL, SSTR2, GRM3, GRM2, GRM7, NTRK2	1244	113	13528	2.88706	0.000779096	1.55879e-05	0.000432012
GOTERM_BP_FAT	GO:0030817~regulation of cAMP biosynthetic process	28	1.58103	2.51845e-07	ADCY3, GNAZ, MCHR1, PALM, ADCY1, ADCY2, DRD2, ADCY8, GNAI1, ADCY5, ADCYAP1R1, ADCY6, GABBR2, ADORA1, GPR3, HRH3, ADRA2A, CAP2, OPRL1, NPY1R, CRHR1, GRM4, GNAL, SSTR2, GRM3, GRM2, GRM7, NTRK2	1244	101	13528	3.01474	0.000825961	1.62019e-05	0.00045801
GOTERM_BP_FAT	GO:0051339~regulation of lyase activity	28	1.58103	2.51845e-07	ADCY3, GNAZ, MCHR1, PALM, ADCY1, ADCY2, DRD2, ADCY8, GNAI1, ADCY5, ADCYAP1R1, ADCY6, GABBR2, ADORA1, GPR3, HRH3, ADRA2A, CAP2, OPRL1, NPY1R, CRHR1, GRM4, GNAL, SSTR2, GRM3, GRM2, GRM7, NTRK2	1244	101	13528	3.01474	0.000825961	1.62019e-05	0.00045801
GOTERM_BP_FAT	GO:0006887~exocytosis	30	1.69396	3.5557e-07	SEPT5, CPLX3, RAB3A, RAD21L1, CPLX2, CPLX1, SRCIN1, SYT6, PEX5L, RIMS1, RIMS4, STXBP5L, RIMS3, ANK1, ROPN1B, SNPH, RAPGEF4, SNAP25, SCAMP5, STX1A, GLRB, LIN7B, STXBP1, PCLO, P2RX7, DOC2A, TRIM36, STXBP5, UNC13C, CACNA1C, CACNA1A	1244	115	13528	2.83685	0.00116594	2.24348e-05	0.000646646
GOTERM_BP_FAT	GO:0007187~G-protein signaling, coupled to cyclic nucleotide second messenger	30	1.69396	3.5557e-07	GNAZ, ADCY3, MCHR1, ADCY1, ADCY2, DRD2, ADCY8, GNAI1, ADCY5, ADCY6, VIPR1, ADORA1, GPR3, MC1R, HRH3, HRH2, CNR1, AGT, GLP2R, TUBB3, RXFP1, OPRL1, NPY1R, CRHR1, GRM4, GNAL, SSTR2, NPY, CHRM2, SSTR1, ADRA1B	1244	115	13528	2.83685	0.00116594	2.24348e-05	0.000646646
GOTERM_BP_FAT	GO:0006140~regulation of nucleotide metabolic process	30	1.69396	4.33125e-07	GNAZ, ADCY3, MCHR1, PALM, ADCY1, ADCY2, DRD2, ADCY8, GNAI1, ADCY5, ADCYAP1R1, ADCY6, GABBR2, TIMP2, ADORA1, GPR3, HRH3, ADRA2A, GUCY1A3, CAP2, OPRL1, NPY1R, CRHR1, GRM4, GNAL, SSTR2, GRM3, GRM2, GRM7, NTRK2	1244	116	13528	2.8124	0.00142007	2.68126e-05	0.00078769
GOTERM_BP_FAT	GO:0030802~regulation of cyclic nucleotide biosynthetic process	29	1.63749	4.58137e-07	GNAZ, ADCY3, MCHR1, PALM, ADCY1, ADCY2, DRD2, ADCY8, GNAI1, ADCY5, ADCYAP1R1, ADCY6, GABBR2, ADORA1, GPR3, HRH3, ADRA2A, GUCY1A3, CAP2, OPRL1, NPY1R, CRHR1, GRM4, GNAL, SSTR2, GRM3, GRM2, GRM7, NTRK2	1244	110	13528	2.86694	0.00150202	2.78357e-05	0.000833176
GOTERM_BP_FAT	GO:0030808~regulation of nucleotide biosynthetic process	29	1.63749	4.58137e-07	GNAZ, ADCY3, MCHR1, PALM, ADCY1, ADCY2, DRD2, ADCY8, GNAI1, ADCY5, ADCYAP1R1, ADCY6, GABBR2, ADORA1, GPR3, HRH3, ADRA2A, GUCY1A3, CAP2, OPRL1, NPY1R, CRHR1, GRM4, GNAL, SSTR2, GRM3, GRM2, GRM7, NTRK2	1244	110	13528	2.86694	0.00150202	2.78357e-05	0.000833176
GOTERM_BP_FAT	GO:0019935~cyclic-nucleotide-mediated signaling	32	1.80689	5.40456e-07	GNAZ, ADCY3, MCHR1, ADCY1, ADCY2, ADCY8, DRD2, GNAI1, ADCY5, ADCY6, VIPR1, ADORA1, GPR3, MC1R, HRH3, HRH2, CNR1, AGT, RAPGEF4, GLP2R, TUBB3, RXFP1, OPRL1, NPY1R, PCLO, CRHR1, GRM4, GNAL, SSTR2, NPY, CHRM2, SSTR1, ADRA1B	1244	130	13528	2.67682	0.00177167	3.22401e-05	0.000982883
GOTERM_BP_FAT	GO:0055082~cellular chemical homeostasis	66	3.72671	5.89588e-07	MCHR1, JPH4, GRIK2, GRIK3, SNCA, LPAR2, KCNJ11, ADORA1, MBP, ATP2B2, GRIN2C, SLC24A3, SAA1, SLC1A6, RGN, LGI4, CHRNA4, IL1B, LTF, SV2A, MT3, KCNMA1, KCND2, CACNG2, PRKCB, AMIGO1, CLDN1, RYR1, RYR2, CARTPT, GPR12, MON1A, CLDN16, TF, PRKCZ, KCNMB4, FTLP2, DRD2, TFR2, FKBP1A, CACNB4, CLDN11, FKBP1B, KCNMB2, GCKR, HRH3, PTK2B, AGT, PPP3CA, NEDD4L, GLRB, PLP1, SLC8A1, OPRL1, GRIN1, ATP1A2, NPY1R, ITPR…	1244	380	13528	1.88875	0.00193257	3.45429e-05	0.00107223
GOTERM_BP_FAT	GO:0017157~regulation of exocytosis	15	0.846979	6.79802e-07	SEPT5, SYT1, RAB3A, STX1A, RAB3C, STXBP1, NCS1, PCLO, STX1B, DOC2A, RAPGEF4, RAB26, CACNA1A, NSF, SCAMP5	1244	34	13528	4.79762	0.00222795	3.91296e-05	0.0012363
GOTERM_BP_FAT	GO:0008344~adult locomotory behavior	19	1.07284	7.53916e-07	KCNMA1, GLRB, EFNB3, DRD2, SPTBN4, GRIN1, UCHL1, SNCA, ATP1A3, ATP1A2, CACNB4, TRH, NTSR1, KLHL1, GRM2, EPS8, GRIN2D, CACNA1C, CACNA1A	1244	54	13528	3.82625	0.00247054	4.26473e-05	0.00137108
GOTERM_BP_FAT	GO:0007613~memory	16	0.903444	7.78008e-07	PRKCZ, ADCY1, ADCY8, GRIN1, ATP1A3, CHST10, HRH3, GRIA1, RASGRF1, GRM7, CRH, IL1B, CHRNB2, PLCB1, SNAP25, HTR2A	1244	39	13528	4.46137	0.00254939	4.32643e-05	0.0014149
GOTERM_BP_FAT	GO:0007193~inhibition of adenylate cyclase activity by G-protein signaling	16	0.903444	1.13963e-06	GNAZ, ADCY3, MCHR1, ADCY1, ADCY2, DRD2, ADCY8, GNAI1, OPRL1, ADCY5, ADCY6, NPY1R, ADORA1, GNAL, GRM4, SSTR2	1244	40	13528	4.34984	0.00373215	6.23169e-05	0.00207254
GOTERM_BP_FAT	GO:0016079~synaptic vesicle exocytosis	10	0.564653	1.36212e-06	SEPT5, RAB3A, CPLX3, STX1A, RAD21L1, P2RX7, DOC2A, SNPH, RIMS1, PCLO, SNAP25	1244	15	13528	7.24973	0.00445915	7.32617e-05	0.00247716
GOTERM_BP_FAT	GO:0019932~second-messenger-mediated signaling	46	2.5974	1.5079e-06	GNAZ, ADCY3, EDN3, MCHR1, ADCY1, ADCY2, GNAI1, ADCY8, DRD2, ADCY5, ADCY6, NCS1, VIPR1, ADORA1, GPR3, CAMKK2, HRH3, MC1R, HRH2, AGT, CNR1, RAPGEF4, GLP2R, TUBB3, RXFP1, OPRL1, PIK3C2B, RCAN1, NPY1R, PCLO, RCAN2, GRM1, MCTP1, GRM5, CRHR1, GNAL, GRM4, SSTR2, GCK, NPY, SSTR1, CA8, CHRM2, CHRM1, ADRA1B, BUB1B, HTR2A	1244	235	13528	2.12864	0.00493521	7.9794e-05	0.00274227
GOTERM_BP_FAT	GO:0007616~long-term memory	9	0.508187	1.75685e-06	PRKCZ, ADCY1, CHST10, ADCY8, RASGRF1, GRIA1, GRIN1, CRH, SNAP25	1244	12	13528	8.15595	0.00574764	9.14913e-05	0.003195
GOTERM_BP_FAT	GO:0048878~chemical homeostasis	80	4.51722	2.63851e-06	JPH4, MCHR1, SLC9A6, SLC9A5, GRIK2, INS-IGF2, GRIK3, PPARG, SNCA, LPAR2, VGF, KCNJ11, ADORA1, MBP, ATP2B2, GRIN2C, SLC24A3, SAA1, SLC1A6, SERPINE1, RGN, LTF, IL1B, LGI4, CHRNA4, SV2A, AKR1C1, MT3, KCNMA1, KCND2, CACNG2, PRKCB, SLC26A4, AMIGO1, CLDN1, RYR1, RYR2, CARTPT, GPR12, MON1A, CLDN16, TF, KCNMB4, PRKCZ, FTLP2, DRD2, TFR2, FKBP1A, CACNB4, CLDN11, FKBP1B, KCNMB2, GCKR, HRH3, INS, PTK2B, AGT,…	1244	512	13528	1.69916	0.0086196	0.000135256	0.00479836
GOTERM_BP_FAT	GO:0006873~cellular ion homeostasis	63	3.55731	3.13092e-06	MCHR1, JPH4, GRIK2, GRIK3, SNCA, LPAR2, KCNJ11, ADORA1, MBP, ATP2B2, GRIN2C, SAA1, SLC24A3, SLC1A6, RGN, LGI4, CHRNA4, IL1B, LTF, SV2A, MT3, KCNMA1, KCND2, CACNG2, PRKCB, AMIGO1, CLDN1, RYR1, RYR2, GPR12, MON1A, CLDN16, TF, PRKCZ, KCNMB4, FTLP2, DRD2, TFR2, FKBP1A, CACNB4, CLDN11, FKBP1B, KCNMB2, HRH3, PTK2B, AGT, PPP3CA, NEDD4L, GLRB, PLP1, SLC8A1, OPRL1, GRIN1, ATP1A2, NPY1R, ITPR1, P2RX7, ATP6…	1244	374	13528	1.83182	0.01022	0.000158027	0.00569382
GOTERM_BP_FAT	GO:0007214~gamma-aminobutyric acid signaling pathway	11	0.621118	3.23585e-06	GABRG2, GABRG3, GABRA2, GABRA1, GABRA4, GABRA3, GABRB2, GABRA5, CACNB4, GABBR2, CACNA1A	1244	20	13528	5.98103	0.0105607	0.000160848	0.00588464
GOTERM_BP_FAT	GO:0008016~regulation of heart contraction	22	1.24224	3.76719e-06	EDN3, SLC8A1, GNAO1, THRA, CYP2J2, THRB, EPAS1, DRD2, ATP1A2, KCNIP2, ADORA1, FKBP1B, TNNT2, CHRM2, ADRA1B, CACNA1G, CACNA1H, PEBP1, RYR2, HBEGF, CELF2, HCN4	1244	77	13528	3.10703	0.0122841	0.000184463	0.00685089
GOTERM_BP_FAT	GO:0050801~ion homeostasis	67	3.78317	3.91416e-06	MCHR1, JPH4, SLC9A6, SLC9A5, GRIK2, GRIK3, SNCA, LPAR2, KCNJ11, ADORA1, MBP, ATP2B2, GRIN2C, SLC24A3, SAA1, SLC1A6, RGN, LGI4, CHRNA4, IL1B, LTF, SV2A, MT3, KCNMA1, KCND2, CACNG2, PRKCB, AMIGO1, SLC26A4, CLDN1, RYR1, RYR2, GPR12, MON1A, CLDN16, TF, PRKCZ, KCNMB4, FTLP2, DRD2, TFR2, FKBP1A, CACNB4, CLDN11, FKBP1B, KCNMB2, HRH3, PTK2B, AGT, PPP3CA, NEDD4L, GLRB, PLP1, SLC8A1, OPRL1, GRIN1, ATP1A2, …	1244	409	13528	1.78141	0.0127603	0.000188841	0.00711816
GOTERM_BP_FAT	GO:0007215~glutamate signaling pathway	12	0.677583	4.99904e-06	GRM5, GRM4, CDK5R1, SSTR1, GRIK2, GRIN2C, GRIK3, GRIK4, GRIN1, ATP1A3, GRIA3, GRIN3A	1244	25	13528	5.21981	0.0162681	0.00023768	0.009091
GOTERM_BP_FAT	GO:0007628~adult walking behavior	11	0.621118	9.53842e-06	KCNMA1, GLRB, EFNB3, DRD2, SPTBN4, UCHL1, CACNB4, TRH, CACNA1C, CACNA1A, KLHL1	1244	22	13528	5.4373	0.0308111	0.000446981	0.0173454
GOTERM_BP_FAT	GO:0019933~cAMP-mediated signaling	24	1.35517	1.17552e-05	GNAZ, ADCY3, MCHR1, ADCY1, ADCY2, RXFP1, OPRL1, DRD2, ADCY8, GNAI1, ADCY5, ADCY6, NPY1R, ADORA1, PCLO, GPR3, CRHR1, GRM4, GNAL, SSTR2, CHRM2, ADRA1B, RAPGEF4, GLP2R	1244	95	13528	2.74727	0.0378346	0.000543077	0.0213761
GOTERM_BP_FAT	GO:0016192~vesicle-mediated transport	85	4.79955	1.20318e-05	SEPT5, HRAS, AP1G2, SRCIN1, RAB9B, MARCKSL1, HIP1R, SNCA, SYT6, ADORA1, STXBP5L, SYP, ASGR1, PACSIN1, ANK1, ACTR1A, SNPH, DNAJC6, RHOB, RAPGEF4, RAB6B, AGAP3, SCAMP5, SH3GL3, RAMP2, STX1A, ARC, ICAM5, NCALD, KIF17, LRP1B, PICK1, STXBP1, STX1B, PCLO, ELMO2, ELMO1, DOC2A, TRIM36, STXBP6, STXBP5, VAMP2, BIN1, UNC13C, SH3GL2, KALRN, PACS1, CPLX3, RAB3A, RAD21L1, CPLX2, CPLX1, SNAP91, FTLP2, CYTH3, NA…	1244	576	13528	1.60476	0.0387075	0.000548135	0.0218791
GOTERM_BP_FAT	GO:0050767~regulation of neurogenesis	34	1.91982	1.64197e-05	ZNF488, PLXNA3, CDK5R1, LZTS1, DRD2, PPARG, KIT, LRRC4C, TIMP2, MBP, NRCAM, LINGO1, MAPT, ROBO2, DNMT3B, MT3, MAG, BMP2, DTX1, GRIN1, RTN4R, THY1, AMIGO1, EYA1, DLX1, YWHAH, CCND2, NTRK2, FOXG1, NEUROD1, CNTN4, CHRNB2, CACNA1A, KALRN	1244	166	13528	2.22733	0.0524479	0.000737719	0.029857
GOTERM_BP_FAT	GO:0007188~G-protein signaling, coupled to cAMP nucleotide second messenger	22	1.24224	2.00491e-05	GNAZ, ADCY3, MCHR1, ADCY1, ADCY2, RXFP1, OPRL1, DRD2, ADCY8, GNAI1, ADCY5, ADCY6, NPY1R, ADORA1, GPR3, CRHR1, GRM4, GNAL, SSTR2, CHRM2, ADRA1B, GLP2R	1244	85	13528	2.8146	0.0636648	0.000888548	0.0364556
GOTERM_BP_FAT	GO:0042391~regulation of membrane potential	29	1.63749	2.74017e-05	KCNMB4, PRKCZ, GRIK2, GRIK3, SNCA, CLDN11, CACNB4, ADORA1, KCNJ11, KCNMB2, MBP, GRIN2C, SLC1A6, CHRNA4, LGI4, PPP3CA, KCNMA1, PLP1, GLRB, KCND2, GRIN1, CACNG2, AMIGO1, P2RX7, CACNA1G, CLDN1, CHRNB2, SCN8A, CACNA1A	1244	134	13528	2.35346	0.0859831	0.00119803	0.0498217
GOTERM_BP_FAT	GO:0014070~response to organic cyclic substance	27	1.52456	3.16104e-05	TF, SLC6A1, DRD2, ALDOC, PPARG, FKBP1A, TRH, HRH3, PTK2B, IL1B, CHRNA4, SLC22A6, STS, GNAO1, CYP1A1, GRIN1, LEF1, GNAL, P2RX7, GRM2, CCND2, RYR1, ADRA1B, PEBP1, RYR2, CHRNB2, AACS	1244	121	13528	2.42656	0.0985181	0.00136374	0.0574719
GOTERM_BP_FAT	GO:0006814~sodium ion transport	28	1.58103	4.23747e-05	FXYD2, SLC38A3, ATP1B1, SLC9A6, SCN1B, SLC9A5, ATP1B2, SCN3B, SLC23A2, SLC24A3, SCN9A, NALCN, NEDD4L, SLC4A4, HCN4, HCN3, HCN1, SLC8A1, SLC12A1, SLC8A2, SCN2B, SCN2A, ATP1A3, ATP1A2, SLC17A7, ACCN2, SLC4A10, SCN8A	1244	130	13528	2.34222	0.129802	0.00180401	0.0770357
GOTERM_BP_FAT	GO:0019725~cellular homeostasis	70	3.95257	4.43792e-05	MCHR1, JPH4, PDIA2, GRIK2, GRIK3, SNCA, LPAR2, KCNJ11, ADORA1, MBP, ATP2B2, GRIN2C, SLC24A3, SAA1, SLC1A6, RGN, LTF, LGI4, CHRNA4, IL1B, SV2A, MT3, KCNMA1, KCND2, CACNG2, PRKCB, AMIGO1, CLDN1, RYR1, RYR2, CARTPT, GPR12, MON1A, CLDN16, TF, PRKCZ, KCNMB4, FTLP2, DRD2, TFR2, FKBP1A, CACNB4, CLDN11, FKBP1B, KCNMB2, GCKR, HRH3, PTK2B, AGT, DMD, PPP3CA, NEDD4L, SEPW1, GLRB, SLC8A1, PLP1, OPRL1, GRIN1, …	1244	466	13528	1.63352	0.135506	0.00186507	0.0806784
GOTERM_BP_FAT	GO:0046928~regulation of neurotransmitter secretion	10	0.564653	4.80221e-05	KCNMB4, RAB3A, EDN3, CPLX3, STX1A, SNCA, NTRK2, STXBP1, CAMK2A, CACNA1A	1244	21	13528	5.17838	0.145778	0.0019925	0.0872982
GOTERM_BP_FAT	GO:0050805~negative regulation of synaptic transmission	10	0.564653	4.80221e-05	KCNQ4, ACHE, SLC6A1, GRIK2, BCHE, DRD2, GRIK3, STXBP1, ADORA1, HTR2A	1244	21	13528	5.17838	0.145778	0.0019925	0.0872982
GOTERM_BP_FAT	GO:0008038~neuron recognition	10	0.564653	4.80221e-05	AMIGO1, NRCAM, CDK5R1, EFNB3, OPCML, FOXG1, CELSR3, CNTNAP2, CNTN4, GAP43	1244	21	13528	5.17838	0.145778	0.0019925	0.0872982
GOTERM_BP_FAT	GO:0060284~regulation of cell development	38	2.14568	4.85645e-05	ZNF488, CDK5R1, PLXNA3, LZTS1, INS-IGF2, DRD2, PPARG, KIT, LRRC4C, TIMP2, MBP, NRCAM, LINGO1, INS, MAPT, ROBO2, DNMT3B, MT3, MAG, BMP2, DTX1, GRIN1, RTN4R, IGF2, PROX1, THY1, HDAC5, AMIGO1, EYA1, DLX1, YWHAH, CCND2, NTRK2, FOXG1, NEUROD1, CNTN4, CHRNB2, HDAC9, CACNA1A, KALRN	1244	205	13528	2.01578	0.147297	0.00198982	0.0882839
GOTERM_BP_FAT	GO:0003012~muscle system process	33	1.86335	5.29854e-05	EDN3, CAMTA2, MYBPC1, TRPV1, DRD2, FKBP1A, VIPR1, KCNIP2, FKBP1B, GJC1, MYOM2, AGT, IL1B, GUCY1A3, HCN4, DTNA, KCNMA1, SLC8A1, ACTC1, GNAO1, CRYAB, ACTN2, HDAC5, TNNT2, SSTR2, CHRM3, CACNA1G, RYR1, CACNA1H, RYR2, CHRNB2, CACNA1C, SNTA1	1244	168	13528	2.13608	0.159577	0.00214399	0.0963168
GOTERM_BP_FAT	GO:0051588~regulation of neurotransmitter transport	11	0.621118	5.56245e-05	KCNMB4, RAB3A, EDN3, CPLX3, STX1A, DRD2, SNCA, NTRK2, STXBP1, CAMK2A, CACNA1A	1244	26	13528	4.60079	0.166823	0.00222325	0.101112
GOTERM_BP_FAT	GO:0007632~visual behavior	12	0.677583	5.65834e-05	HRAS, SLC1A2, PDE1B, DRD2, GRIN1, ADRA1B, ATP1A3, CHRNB2, ATP1A2, KIT, CACNA1C, APBB1	1244	31	13528	4.20952	0.16944	0.00223431	0.102854
GOTERM_BP_FAT	GO:0000165~MAPKKK cascade	35	1.97628	5.95705e-05	FGFR3, INS-IGF2, LPAR2, FGF13, ADORA1, CAMKK2, MAP3K5, INS, PTK2B, MAP3K9, ADRA2A, IL1B, ADRA2C, PAK1, SCG2, TNIK, CRYAB, LRRN3, MET, IGF2, MAPK10, GRM1, SHANK3, GRM4, SH2D3C, P2RX7, DOK4, DOK5, RGS4, GADD45G, MAPK8IP2, MAP3K10, CARTPT, MAPK9, MAPK8IP1, DUSP9, DUSP8	1244	184	13528	2.06854	0.177541	0.00232416	0.108281
GOTERM_BP_FAT	GO:0051960~regulation of nervous system development	36	2.03275	6.23459e-05	ZNF488, TF, CDK5R1, PLXNA3, LZTS1, DRD2, PPARG, KIT, LRRC4C, TIMP2, MBP, NRCAM, LINGO1, MAPT, ROBO2, SNAP25, DNMT3B, MT3, MAG, BMP2, DTX1, GRIN1, RTN4R, THY1, AMIGO1, EYA1, DLX1, YWHAH, CCND2, NTRK2, FOXG1, NEUROD1, CNTN4, CHRNB2, CACNA1A, KALRN	1244	192	13528	2.03899	0.184997	0.00240373	0.113323
GOTERM_BP_FAT	GO:0043279~response to alkaloid	16	0.903444	7.15355e-05	GNAO1, SLC6A1, DRD2, PPARG, GRIN1, FKBP1A, GNAL, GRM2, BCHE, PTK2B, ADRA1B, RYR1, RYR2, IL1B, CHRNA4, CHRNB2	1244	54	13528	3.2221	0.209205	0.00272554	0.130016
GOTERM_BP_FAT	GO:0008542~visual learning	11	0.621118	8.11088e-05	HRAS, PDE1B, DRD2, GRIN1, ADRA1B, ATP1A3, CHRNB2, ATP1A2, KIT, CACNA1C, APBB1	1244	27	13528	4.43039	0.233659	0.00305428	0.147404
GOTERM_BP_FAT	GO:0007626~locomotory behavior	46	2.5974	8.63308e-05	EDN3, PLXNA3, HRAS, DRD2, SNCA, UCHL1, ASTN1, SOBP, CACNB4, TRH, KLHL1, ATP2B2, DEFA1B, PDE1B, SAA1, MYO15A, GRIN2D, CHRNA4, APBA2, IL1B, ROBO2, CCBP2, APBA1, GNG7, SCG2, KCNMA1, GLRB, GNAO1, EFNB3, SPTBN4, GRIN1, ATP1A3, ATP1A2, NPY1R, NTSR1, GRM1, GRM2, EPS8, PTGDS, ADRA1B, PDGFRB, CHRNB2, CACNA1C, CMTM4, RASD2, CACNA1A	1244	274	13528	1.82566	0.246679	0.00321373	0.156887
GOTERM_BP_FAT	GO:0006939~smooth muscle contraction	12	0.677583	0.00010889	KCNMA1, EDN3, SSTR2, ACTC1, CHRM3, TRPV1, DRD2, AGT, CACNA1G, CHRNB2, CACNA1C, FKBP1B	1244	33	13528	3.9544	0.300428	0.00400642	0.197845
GOTERM_BP_FAT	GO:0017156~calcium ion-dependent exocytosis	10	0.564653	0.000112706	STX1A, GLRB, TRIM36, ROPN1B, SYT6, RAPGEF4, CACNA1C, RIMS1, CACNA1A, RIMS3	1244	23	13528	4.72809	0.309135	0.00410057	0.204772
GOTERM_BP_FAT	GO:0015807~L-amino acid transport	10	0.564653	0.000112706	SLC1A4, SLC1A2, SLC38A3, SLC1A3, SLC6A1, CACNB4, SLC7A5, SLC1A1, CACNA1A, APBA1	1244	23	13528	4.72809	0.309135	0.00410057	0.204772
GOTERM_BP_FAT	GO:0007264~small GTPase mediated signal transduction	49	2.7668	0.00014825	HRAS, RAB9B, RASGEF1A, RRAD, RHOU, DIRAS1, DIRAS2, RASL10A, RASL10B, RHOB, RAPGEF5, RAB6B, RAPGEF4, RAB26, AGAP2, AGAP3, ARHGEF7, ELMO1, SH2D3C, RND1, RASGRF1, RAB17, SIAH2, ARL4D, RAPGEFL1, RASD2, RAB3A, RAB3C, RALGPS1, MRAS, RUNDC3A, RAB40C, RAB40B, ROPN1B, RAC3, RASGRP2, ADRA2A, KNDC1, CNKSR1, GDI1, ABR, VAV2, RAB33A, RABL2A, RABL2B, RASL11B, RHEB, RIT2, TNK2	1244	305	13528	1.74707	0.385192	0.00533129	0.269268
GOTERM_BP_FAT	GO:0010975~regulation of neuron projection development	18	1.01637	0.000151748	MAG, PLXNA3, LZTS1, GRIN1, RTN4R, LRRC4C, MBP, THY1, AMIGO1, NRCAM, LINGO1, YWHAH, MAPT, NTRK2, ROBO2, CHRNB2, CACNA1A, KALRN	1244	70	13528	2.79633	0.392208	0.00539758	0.275613
GOTERM_BP_FAT	GO:0045664~regulation of neuron differentiation	27	1.52456	0.000166816	CDK5R1, PLXNA3, LZTS1, LRRC4C, TIMP2, MBP, NRCAM, LINGO1, MAPT, ROBO2, DNMT3B, MAG, DTX1, GRIN1, RTN4R, THY1, AMIGO1, EYA1, YWHAH, CCND2, FOXG1, NTRK2, NEUROD1, CNTN4, CHRNB2, CACNA1A, KALRN	1244	133	13528	2.20763	0.42153	0.00586839	0.302941
GOTERM_BP_FAT	GO:0048813~dendrite morphogenesis	7	0.395257	0.000183074	KLF7, CELSR2, HPRT1, DCX, DCLK1, CACNA1A, CTNNA2	1244	11	13528	6.9202	0.451583	0.00637026	0.33242
GOTERM_BP_FAT	GO:0006875~cellular metal ion homeostasis	35	1.97628	0.000213698	CLDN16, JPH4, MCHR1, GRIK2, DRD2, LPAR2, FKBP1A, CACNB4, FKBP1B, ATP2B2, HRH3, PTK2B, SAA1, SLC24A3, AGT, RGN, IL1B, SV2A, NEDD4L, MT3, KCNMA1, SLC8A1, OPRL1, GRIN1, ATP1A2, NPY1R, ITPR1, PRKCB, P2RX7, RYR1, CACNA1G, RYR2, CACNA1C, GPR12, CACNA1A	1244	196	13528	1.94189	0.504019	0.00735406	0.387924
GOTERM_BP_FAT	GO:0060401~cytosolic calcium ion transport	9	0.508187	0.000228404	JPH4, P2RX7, SLC8A1, DRD2, RYR1, RYR2, FKBP1A, CACNA1C, FKBP1B	1244	20	13528	4.89357	0.527387	0.00777666	0.414566
GOTERM_BP_FAT	GO:0051970~negative regulation of transmission of nerve impulse	10	0.564653	0.000237943	KCNQ4, ACHE, SLC6A1, GRIK2, BCHE, DRD2, GRIK3, STXBP1, ADORA1, HTR2A	1244	25	13528	4.34984	0.541953	0.00801701	0.431846
GOTERM_BP_FAT	GO:0007218~neuropeptide signaling pathway	21	1.18577	0.000247212	NXPH3, MCHR1, GLRB, NXPH4, GPR133, GPR64, GLRA2, CELSR3, CELSR2, NPY1R, SORCS2, SSTR2, NPIP, NPY, PENK, CPE, SSTR1, BAI1, BAI3, CARTPT, PCSK1N	1244	93	13528	2.45555	0.555676	0.0082434	0.448632
GOTERM_BP_FAT	GO:0033674~positive regulation of kinase activity	39	2.20215	0.000287548	ADCY3, EDN3, PRKCZ, ADCY1, ADCY2, INS-IGF2, ADCY8, ADCY5, ADCY6, ZEB2, LPAR2, KIT, ADORA1, PRKAR2B, MAP3K5, CERKL, DGKE, INS, PTK2B, MAP3K9, ADRA2A, IL1B, ADRA2C, PAK1, NRG1, MET, LRRN3, PICK1, IGF2, VAV2, GRM1, GRM4, P2RX7, CCND2, PRKAR1B, CHRM1, GADD45G, MAP3K10, CARTPT, GAP43, HTR2A	1244	231	13528	1.83597	0.610768	0.00948584	0.521652
GOTERM_BP_FAT	GO:0045860~positive regulation of protein kinase activity	38	2.14568	0.000289052	ADCY3, EDN3, PRKCZ, ADCY1, ADCY2, INS-IGF2, ADCY8, ADCY5, ADCY6, LPAR2, ZEB2, KIT, ADORA1, PRKAR2B, MAP3K5, CERKL, DGKE, INS, PTK2B, MAP3K9, ADRA2A, IL1B, ADRA2C, PAK1, NRG1, MET, LRRN3, PICK1, IGF2, GRM1, GRM4, P2RX7, CCND2, PRKAR1B, CHRM1, GADD45G, MAP3K10, CARTPT, GAP43, HTR2A	1244	223	13528	1.85307	0.612685	0.00944032	0.524374
GOTERM_BP_FAT	GO:0007270~nerve-nerve synaptic transmission	11	0.621118	0.000303194	SLC1A4, GLRB, CAMK4, GABRB3, DRD2, GRIN2D, SNCA, GRIN1, TMOD2, CACNB4, CACNA1A	1244	31	13528	3.85873	0.630251	0.00980243	0.549962
GOTERM_BP_FAT	GO:0006936~muscle contraction	29	1.63749	0.000304905	EDN3, TRPV1, DRD2, MYBPC1, FKBP1A, VIPR1, KCNIP2, FKBP1B, GJC1, MYOM2, AGT, HCN4, DTNA, KCNMA1, SLC8A1, ACTC1, GNAO1, CRYAB, ACTN2, TNNT2, SSTR2, CHRM3, CACNA1G, RYR1, CACNA1H, RYR2, CHRNB2, CACNA1C, SNTA1	1244	153	13528	2.0612	0.632321	0.00976132	0.553058
GOTERM_BP_FAT	GO:0050808~synapse organization	16	0.903444	0.000315938	ACHE, DRD2, SPOCK2, NRXN3, GLRA2, NFASC, CACNB2, NLGN2, NRXN1, CACNG2, CACNB4, NRCAM, ATP2B2, DRP2, CACNA1A, SNTA1	1244	61	13528	2.85235	0.645397	0.0100151	0.573016
GOTERM_BP_FAT	GO:0010959~regulation of metal ion transport	19	1.07284	0.000324618	MCHR1, JPH4, CACNA2D1, SLC8A1, GNAO1, DRD2, FKBP1A, CACNB4, ADORA1, FKBP1B, THY1, ATP2B2, P2RX7, SLN, GCK, CALM3, RYR2, NEDD4L, CALM1, HTR2A	1244	81	13528	2.55083	0.655356	0.0101905	0.588714
GOTERM_BP_FAT	GO:0007010~cytoskeleton organization	63	3.55731	0.000333523	DLC1, HRAS, TLN2, WASF1, LMO7, RHOU, KLHL1, CTTNBP2, KISS1, PACSIN1, ANK1, TMSB15A, MAPT, MICAL1, PAK1, INA, FMNL1, ARHGEF2, STMN3, CRYAB, PROX1, PCLO, MARK1, ELMO1, THY1, TNNT2, FMN2, MAST1, EPB41L1, RND1, LIMCH1, TPPP, FHOD3, BUB1B, ADD2, ABLIM2, PRKCZ, PALM, ABLIM3, MRAS, ELN, FHDC1, DAAM1, DAAM2, CORO2B, SORBS1, RAC3, PTK2B, DMD, ADRA2A, TEKT2, INF2, ACTC1, CAP2, PCNT, SPTBN4, EVL, SHANK1, EP…	1244	436	13528	1.57133	0.665284	0.0103694	0.604819
GOTERM_BP_FAT	GO:0048169~regulation of long-term neuronal synaptic plasticity	9	0.508187	0.000339407	SYP, HRAS, GRIK2, DRD2, AGT, SNCA, GRIN1, KIT, SYNGR1	1244	21	13528	4.66054	0.671686	0.0104524	0.615458
GOTERM_BP_FAT	GO:0051899~membrane depolarization	13	0.734049	0.000355994	PRKCZ, GRIK2, SNCA, GRIN1, CACNG2, ADORA1, P2RX7, GRIN2C, CACNA1G, CHRNA4, CHRNB2, PPP3CA, CACNA1A	1244	43	13528	3.28767	0.689081	0.0108586	0.645443
GOTERM_BP_FAT	GO:0016337~cell-cell adhesion	44	2.48447	0.000400697	CLDN16, CDK5R1, CADM3, THRA, CLSTN3, PCDH20, CLDN5, ASTN1, CTNND2, LMO7, CLDN11, DCHS1, NRCAM, CDH8, CDH22, CDH20, BARX2, FAT3, ROPN1B, FAT2, ROBO2, DLG5, COL11A1, CDH24, ICAM5, CDHR1, PCDH11X, STXBP1, CELSR3, NLGN2, PCDH8, PTPRT, CELSR2, PCDH17, PCDH19, CTNNA2, THY1, NCAM1, AMIGO1, CDH18, CLDN1, CNTN4, NCAN, CDH10	1244	276	13528	1.73363	0.731513	0.0121017	0.726215
GOTERM_BP_FAT	GO:0021954~central nervous system neuron development	11	0.621118	0.000405049	DCC, LINGO1, PLXNA3, DRD2, FOXG1, LHX6, CHRNB2, HPRT1, DCX, DCLK1, MYCBP2	1244	32	13528	3.73814	0.735321	0.0121208	0.734075
GOTERM_BP_FAT	GO:0051056~regulation of small GTPase mediated signal transduction	41	2.31508	0.000428973	DLC1, HRAS, RAP1GAP, TBC1D9, RASGEF1A, LPAR2, CYTH3, MCF2L, ADAP1, GARNL3, AGAP8, PTK2B, RASGRP2, RAPGEF5, RAPGEF4, IQSEC3, TBC1D30, RAP1GAP2, AGAP2, KNDC1, IQSEC1, AGAP3, ARHGEF10L, ARHGEF4, ARHGEF2, DAB2IP, ABR, STMN3, ARHGEF7, MCF2, KIAA1244, SIPA1L2, ARHGEF9, VAV2, RALGAPA2, SGSM1, PSD, RASGRF1, EVI5L, SYNGAP1, KALRN	1244	252	13528	1.76928	0.75531	0.0127163	0.777273
GOTERM_BP_FAT	GO:0043086~negative regulation of catalytic activity	44	2.48447	0.000433289	GNAZ, ADCY3, PALM, PRKCZ, MCHR1, ADCY1, ADCY2, INS-IGF2, GNAI1, ADCY8, DRD2, ADCY5, ADCY6, PPARG, SNCA, FKBP1A, PXK, GABBR2, ADORA1, FKBP1B, HRH3, INS, CDKN2D, ADRA2A, IL1B, ANGPTL4, OPRL1, NR4A1, IGF2, NPY1R, PKIA, THY1, TNNT2, GNAL, GRM4, GRM3, SSTR2, GRM2, RGS4, GRM7, GADD45G, ZFYVE28, BUB1B, MAPK8IP1, DUSP9, DUSP8	1244	277	13528	1.72737	0.758752	0.0127285	0.785063
GOTERM_BP_FAT	GO:0009187~cyclic nucleotide metabolic process	12	0.677583	0.000440889	ADCY3, ATP2B2, ADCY1, ADCY2, ADCY8, ADCY5, PDE4A, ADCY6, GUCY1A2, GUCY1A3, GUCY1B3, CACNB4	1244	38	13528	3.43408	0.764696	0.0128354	0.798782
GOTERM_BP_FAT	GO:0055080~cation homeostasis	45	2.54094	0.000455083	CLDN16, TF, MCHR1, JPH4, SLC9A6, FTLP2, SLC9A5, DRD2, GRIK2, TFR2, LPAR2, FKBP1A, CACNB4, FKBP1B, ATP2B2, HRH3, SLC24A3, PTK2B, SAA1, AGT, RGN, IL1B, LTF, NEDD4L, SV2A, MT3, KCNMA1, SLC8A1, OPRL1, GRIN1, ATP1A2, NPY1R, ITPR1, PRKCB, SLC26A4, SLC4A10, P2RX7, ATP6V0E2, RYR1, CACNA1G, RYR2, CACNA1C, CACNA1A, GPR12, MON1A	1244	286	13528	1.71104	0.775408	0.0131296	0.824398
GOTERM_BP_FAT	GO:0034199~activation of protein kinase A activity	8	0.451722	0.000462523	ADCY3, PRKAR2B, ADCY1, ADCY2, ADCY8, ADCY5, PRKAR1B, ADCY6	1244	17	13528	5.11746	0.780826	0.0132266	0.837821
GOTERM_BP_FAT	GO:0055065~metal ion homeostasis	35	1.97628	0.000503682	CLDN16, JPH4, MCHR1, GRIK2, DRD2, LPAR2, FKBP1A, CACNB4, FKBP1B, ATP2B2, HRH3, PTK2B, SAA1, SLC24A3, AGT, RGN, IL1B, SV2A, NEDD4L, MT3, KCNMA1, SLC8A1, OPRL1, GRIN1, ATP1A2, NPY1R, ITPR1, PRKCB, P2RX7, RYR1, CACNA1G, RYR2, CACNA1C, GPR12, CACNA1A	1244	205	13528	1.85664	0.808525	0.0142711	0.912056
GOTERM_BP_FAT	GO:0030003~cellular cation homeostasis	41	2.31508	0.000504785	CLDN16, TF, MCHR1, JPH4, FTLP2, GRIK2, DRD2, TFR2, LPAR2, FKBP1A, CACNB4, FKBP1B, ATP2B2, HRH3, PTK2B, SAA1, SLC24A3, AGT, RGN, IL1B, LTF, SV2A, NEDD4L, MT3, KCNMA1, SLC8A1, OPRL1, GRIN1, ATP1A2, NPY1R, ITPR1, PRKCB, P2RX7, ATP6V0E2, RYR1, CACNA1G, RYR2, CACNA1C, CACNA1A, GPR12, MON1A	1244	254	13528	1.75535	0.809217	0.0141797	0.914045
GOTERM_BP_FAT	GO:0051952~regulation of amine transport	11	0.621118	0.000533814	P2RX7, HRH3, DRD2, AGT, SNCA, CHRNA4, CARTPT, CHRNB2, TRH, CACNA1A, HTR2A	1244	33	13528	3.62487	0.826558	0.0148621	0.966368
GOTERM_BP_FAT	GO:0014048~regulation of glutamate secretion	7	0.395257	0.00057849	P2RX7, HRH3, GRM7, SNCA, IL1B, TRH, ADORA1	1244	13	13528	5.85555	0.850218	0.0159609	1.04684
GOTERM_BP_FAT	GO:0005513~detection of calcium ion	6	0.338792	0.000597068	KCNMB4, SYT1, RYR2, KCNIP2, KCNIP1, KCNMB2	1244	9	13528	7.24973	0.85908	0.0163321	1.08029
GOTERM_BP_FAT	GO:0051347~positive regulation of transferase activity	39	2.20215	0.000619699	ADCY3, EDN3, PRKCZ, ADCY1, ADCY2, INS-IGF2, ADCY8, ADCY5, ADCY6, ZEB2, LPAR2, KIT, ADORA1, PRKAR2B, MAP3K5, CERKL, DGKE, INS, PTK2B, MAP3K9, ADRA2A, IL1B, ADRA2C, PAK1, NRG1, MET, LRRN3, PICK1, IGF2, VAV2, GRM1, GRM4, P2RX7, CCND2, PRKAR1B, CHRM1, GADD45G, MAP3K10, CARTPT, GAP43, HTR2A	1244	240	13528	1.76712	0.869171	0.016806	1.12102
GOTERM_BP_FAT	GO:0031645~negative regulation of neurological system process	10	0.564653	0.000624705	KCNQ4, ACHE, SLC6A1, GRIK2, BCHE, DRD2, GRIK3, STXBP1, ADORA1, HTR2A	1244	28	13528	3.88379	0.871303	0.0168019	1.13003
GOTERM_BP_FAT	GO:0030900~forebrain development	28	1.58103	0.000629282	DLC1, PLXNA3, DRD2, BCAN, ZEB2, HPRT1, APLP1, ALDH1A2, SLC1A2, LHX2, POU3F3, LHX6, DCLK1, NR2F1, GNAO1, EMX1, OTX1, GRIN1, LEF1, SALL3, DLX1, EYA1, FYN, FOXG1, CHRNB2, FABP7, C1ORF187, NFIB	1244	152	13528	2.00322	0.873223	0.0167864	1.13826
GOTERM_BP_FAT	GO:0009755~hormone-mediated signaling	14	0.790514	0.000658733	ADCY3, ADCY1, ADCY2, THRA, ADCY8, ADCY5, ADCY6, TRH, GNG8, PRKAR2B, PRKAR1B, GNG2, GNG4, GNG7	1244	52	13528	2.92778	0.884907	0.0174238	1.19123
GOTERM_BP_FAT	GO:0021953~central nervous system neuron differentiation	12	0.677583	0.000713853	DCC, LINGO1, PLXNA3, DRD2, FOXG1, LHX6, CHRNB2, HPRT1, DCX, DCLK1, CACNA1A, MYCBP2	1244	40	13528	3.26238	0.90396	0.0187177	1.2903
GOTERM_BP_FAT	GO:0006468~protein amino acid phosphorylation	87	4.91248	0.000722035	STK31, LPAR2, PRKG2, ADORA1, CAMKK1, CAMKK2, PAK6, ACVR1B, PAK7, CTTNBP2, MAP3K5, MAP3K9, IL1B, PAK1, TIE1, MATK, TYRO3, CAMK1G, TNIK, PICK1, PRKCG, PIM3, WNK2, PRKCE, CDKL2, GRM1, MARK1, PRKCB, MAST3, GRM4, ACVR2A, MAST1, STYK1, MAST2, CAMK4, MAPK4, GADD45G, MAP3K10, MAPK9, PDGFRB, CARTPT, KALRN, FGFR2, PRKCZ, CDK5R1, FGFR4, FGFR3, CAMK2G, BRSK2, EPHA10, BRSK1, PXK, KIT, CAMKV, EPHB6, STK32B, SB…	1244	667	13528	1.41843	0.906506	0.0187802	1.305
GOTERM_BP_FAT	GO:0019220~regulation of phosphate metabolic process	67	3.78317	0.000733859	DLC1, ADCY3, EDN3, ADCY1, ADCY2, INS-IGF2, ADCY8, ADCY5, ADCY6, ZEB2, LPAR2, ADORA1, CAMKK2, PRKAR2B, MAP3K5, CERKL, MAP3K9, CDKN2D, IL1B, RAPGEF4, PAK1, PPP1R14C, NRG1, PICK1, PRKCE, GRM1, PKIA, THY1, ACVR2A, INHBA, GRM4, CCND2, CHRM1, GADD45G, ZFYVE28, MAP3K10, CARTPT, PEBP1, PDGFRB, GAP43, PRKCZ, CDK5R1, CDK5R2, FKBP1A, KIT, FKBP1B, DGKE, INS, PTK2B, AGT, ADRA2A, ADRA2C, BMP2, MET, LRRN3, RCAN…	1244	485	13528	1.50226	0.910066	0.0189349	1.32623
GOTERM_BP_FAT	GO:0051174~regulation of phosphorus metabolic process	67	3.78317	0.000733859	DLC1, ADCY3, EDN3, ADCY1, ADCY2, INS-IGF2, ADCY8, ADCY5, ADCY6, ZEB2, LPAR2, ADORA1, CAMKK2, PRKAR2B, MAP3K5, CERKL, MAP3K9, CDKN2D, IL1B, RAPGEF4, PAK1, PPP1R14C, NRG1, PICK1, PRKCE, GRM1, PKIA, THY1, ACVR2A, INHBA, GRM4, CCND2, CHRM1, GADD45G, ZFYVE28, MAP3K10, CARTPT, PEBP1, PDGFRB, GAP43, PRKCZ, CDK5R1, CDK5R2, FKBP1A, KIT, FKBP1B, DGKE, INS, PTK2B, AGT, ADRA2A, ADRA2C, BMP2, MET, LRRN3, RCAN…	1244	485	13528	1.50226	0.910066	0.0189349	1.32623
GOTERM_BP_FAT	GO:0021700~developmental maturation	21	1.18577	0.000765222	KCNMA1, SOX10, RAB3A, PLP1, EPAS1, TRPV1, GRIN1, PICK1, PPARG, STXBP1, KCNIP2, SOX8, NRCAM, SYP, BARX2, RND1, PTK2B, HBZ, LGI4, LHX6, CACNA1A	1244	101	13528	2.26106	0.918866	0.0195825	1.38254
GOTERM_BP_FAT	GO:0043062~extracellular structure organization	29	1.63749	0.000870683	ACHE, SPOCK2, DRD2, ELN, GLRA2, CACNB2, FKBP1A, DCN, CACNB4, APLP1, NRCAM, ATP2B2, AGT, COL12A1, COL11A1, GFOD2, RXFP1, NRXN3, CCDC80, NFASC, NLGN2, CACNG2, NRXN1, COL5A3, CSGALNACT1, DRP2, APBB1, CACNA1A, SNTA1	1244	163	13528	1.93474	0.942614	0.0220804	1.57166
GOTERM_BP_FAT	GO:0016358~dendrite development	11	0.621118	0.000893488	PPP1R9B, KLF7, MCF2, CELSR2, GRIN3A, HPRT1, DCX, DCLK1, CACNA1A, KLHL1, CTNNA2	1244	35	13528	3.41773	0.946755	0.0224787	1.6125
GOTERM_BP_FAT	GO:0002790~peptide secretion	12	0.677583	0.000895727	EDN3, CPLX3, TRPV1, CAMK2G, NEUROD1, RAPGEF4, CACNA1C, VGF, PCLO, FKBP1B, SNAP25, SMPD3	1244	41	13528	3.18281	0.947145	0.0223631	1.61651
GOTERM_BP_FAT	GO:0014050~negative regulation of glutamate secretion	5	0.282326	0.000914393	HRH3, GRM7, IL1B, TRH, ADORA1	1244	6	13528	9.06217	0.950287	0.0226517	1.64994
GOTERM_BP_FAT	GO:0060402~calcium ion transport into cytosol	8	0.451722	0.00101694	JPH4, P2RX7, DRD2, RYR1, RYR2, FKBP1A, CACNA1C, FKBP1B	1244	19	13528	4.57878	0.964503	0.024973	1.83337
GOTERM_BP_FAT	GO:0050433~regulation of catecholamine secretion	8	0.451722	0.00101694	HRH3, DRD2, AGT, SNCA, CHRNA4, CARTPT, CHRNB2, HTR2A	1244	19	13528	4.57878	0.964503	0.024973	1.83337
GOTERM_BP_FAT	GO:0060627~regulation of vesicle-mediated transport	20	1.12931	0.00103206	SEPT5, SYT1, RAB3A, STX1A, RAB3C, SNCA, STXBP1, NCS1, STX1B, PCLO, PACSIN1, DOC2A, RAPGEF4, NEDD4L, RAB26, BIN1, NSF, CACNA1A, SCAMP5, HIP1	1244	96	13528	2.26554	0.966221	0.0251514	1.86037
GOTERM_BP_FAT	GO:0006821~chloride transport	15	0.846979	0.00103883	GABRG2, GLRB, GABRA2, GABRG3, GABRA1, SLC12A1, GABRA4, GABRA3, GLRA2, GABRA5, CELSR3, CTTNBP2, SLC4A10, SLC26A8, CLCN4	1244	61	13528	2.67408	0.966964	0.0251279	1.87247
GOTERM_BP_FAT	GO:0031344~regulation of cell projection organization	19	1.07284	0.00106574	MAG, PLXNA3, LZTS1, GRIN1, RTN4R, KIT, LRRC4C, MBP, THY1, AMIGO1, NRCAM, LINGO1, YWHAH, MAPT, NTRK2, ROBO2, CHRNB2, CACNA1A, KALRN	1244	89	13528	2.32154	0.969759	0.0255824	1.92054
GOTERM_BP_FAT	GO:0014074~response to purine	6	0.338792	0.00110389	GNAL, SLC6A1, PPARG, RYR1, RYR2, FKBP1A	1244	10	13528	6.52476	0.973321	0.0262943	1.98864
GOTERM_BP_FAT	GO:0042325~regulation of phosphorylation	64	3.61378	0.00113144	ADCY3, EDN3, ADCY1, ADCY2, INS-IGF2, ADCY8, ADCY5, ADCY6, ZEB2, LPAR2, ADORA1, CAMKK2, PRKAR2B, MAP3K5, CERKL, MAP3K9, CDKN2D, IL1B, RAPGEF4, PAK1, PPP1R14C, NRG1, PICK1, PRKCE, GRM1, PKIA, THY1, ACVR2A, INHBA, GRM4, CCND2, CHRM1, GADD45G, ZFYVE28, MAP3K10, CARTPT, PEBP1, PDGFRB, GAP43, PRKCZ, CDK5R1, CDK5R2, FKBP1A, KIT, DGKE, INS, PTK2B, AGT, ADRA2A, ADRA2C, BMP2, MET, LRRN3, IGF2, VAV2, SIRT2,…	1244	466	13528	1.49351	0.975629	0.0267478	2.03778
GOTERM_BP_FAT	GO:0051592~response to calcium ion	14	0.790514	0.00116182	KCNMA1, SYT1, KCNMB4, S100A16, SLC6A1, KCNIP2, KCNIP1, KCNMB2, TNNT2, P2RX7, PTK2B, CALM3, RYR2, PEBP1, CALM1	1244	55	13528	2.76808	0.977943	0.0272602	2.09195
GOTERM_BP_FAT	GO:0044092~negative regulation of molecular function	49	2.7668	0.00119635	GNAZ, ADCY3, MCHR1, ADCY1, THRA, ADCY2, INS-IGF2, ADCY8, ADCY5, ADCY6, SNCA, PPARG, HR, GABBR2, ADORA1, CDKN2D, IL1B, PKIA, PROX1, THY1, TNNT2, GRM4, GNAL, SSTR2, GRM3, GRM2, GRM7, ZFYVE28, GADD45G, BUB1B, COMMD7, PALM, PRKCZ, GNAI1, DRD2, FKBP1A, PXK, FKBP1B, HRH3, INS, ADRA2A, ANGPTL4, OPRL1, NR4A1, IGF2, NPY1R, RGS4, CALM3, MAPK8IP1, DUSP9, DUSP8, CALM1	1244	334	13528	1.59538	0.980309	0.0278606	2.1535
GOTERM_BP_FAT	GO:0050905~neuromuscular process	15	0.846979	0.00123043	KCNMA1, GLRB, DRD2, UCHL1, GRIN1, NR4A3, GRIN3A, CTNNA2, ATP2B2, SLC1A3, GRIN2C, RAC3, GRIN2D, FABP7, CACNA1A	1244	62	13528	2.63095	0.982394	0.0284414	2.21418
GOTERM_BP_FAT	GO:0006820~anion transport	26	1.4681	0.00124287	GLRA2, CTTNBP2, SLC1A2, SLC1A3, SLCO1A2, SLC1A6, SLC22A6, SLC4A4, SLC1A1, OCA2, GABRG2, GABRA2, GABRG3, GLRB, GABRA1, SLC12A1, GABRA4, GABRA3, GABRA5, CELSR3, SLC26A4, SLC17A7, SLC4A10, SLC26A8, TOMM40L, CLCN4	1244	143	13528	1.9772	0.983099	0.0285242	2.23633
GOTERM_BP_FAT	GO:0007631~feeding behavior	16	0.903444	0.00126408	MCHR1, DRD2, UCHL1, GRIN1, NPY1R, TRH, HRH3, NPY, FYN, GRM7, AGT, NTRK2, CRH, PEBP1, CARTPT, CHRNB2	1244	69	13528	2.52165	0.984237	0.0288029	2.27408
GOTERM_BP_FAT	GO:0009190~cyclic nucleotide biosynthetic process	9	0.508187	0.00129327	ADCY3, ADCY1, ADCY2, ADCY8, ADCY5, ADCY6, GUCY1A2, GUCY1A3, GUCY1B3	1244	25	13528	3.91486	0.985678	0.0292556	2.32602
GOTERM_BP_FAT	GO:0006835~dicarboxylic acid transport	7	0.395257	0.00143633	SLC1A4, SLC1A2, SLC1A3, SLC26A8, SLC1A6, SLC22A6, SLC1A1	1244	15	13528	5.07481	0.991049	0.0322195	2.58016
GOTERM_BP_FAT	GO:0030036~actin cytoskeleton organization	36	2.03275	0.00148023	DLC1, PRKCZ, HRAS, MRAS, WASF1, ELN, LMO7, FHDC1, DAAM1, DAAM2, RHOU, KLHL1, CORO2B, TMSB15A, SORBS1, RAC3, PTK2B, ADRA2A, FMNL1, INF2, ARHGEF2, ACTC1, EVL, EPB49, GAS7, PROX1, ELMO1, TNNT2, PPP1R9B, FMN2, EPB41L1, RND1, EPS8, LIMCH1, FHOD3, ADD2	1244	226	13528	1.73224	0.992251	0.0329634	2.65802
GOTERM_BP_FAT	GO:0043269~regulation of ion transport	20	1.12931	0.00151301	MCHR1, JPH4, CACNA2D1, SLC8A1, GNAO1, DRD2, FKBP1A, CACNB4, PXK, ADORA1, FKBP1B, THY1, ATP2B2, P2RX7, SLN, GCK, CALM3, RYR2, NEDD4L, CALM1, HTR2A	1244	99	13528	2.19689	0.993043	0.0334547	2.71612
GOTERM_BP_FAT	GO:0007411~axon guidance	21	1.18577	0.00161272	DCC, KLF7, PLXNA3, CDK5R1, EFNB3, NRXN3, KIF5C, NFASC, NRXN1, SLIT1, TBR1, MYCBP2, SEMA6C, UNC5A, LHX2, FOXG1, ROBO2, CNTN4, APBB1, GAP43, C1ORF187	1244	107	13528	2.13427	0.994986	0.0353833	2.89264
GOTERM_BP_FAT	GO:0022604~regulation of cell morphogenesis	24	1.35517	0.00180176	DLC1, MAG, PALM, PLXNA3, LZTS1, GRIN1, RTN4R, FBLIM1, LRRC4C, RHOU, GAS7, MBP, THY1, AMIGO1, NRCAM, LINGO1, YWHAH, FYN, MAPT, ITGA7, ROBO2, CHRNB2, CDC42EP3, CACNA1A	1244	131	13528	1.99229	0.997307	0.0391905	3.22649
GOTERM_BP_FAT	GO:0019233~sensory perception of pain	10	0.564653	0.00181332	P2RX7, PENK, TRPV1, FYN, GRIN1, CHRNA4, CHRNB2, NPY1R, KCNIP3, HTR2A	1244	32	13528	3.39831	0.997407	0.0391778	3.24687
GOTERM_BP_FAT	GO:0046942~carboxylic acid transport	26	1.4681	0.0018511	SLC38A3, SLC6A1, DRD2, AQP8, PPARG, CACNB4, SLC7A5, SLCO2A1, SLC1A4, SLC32A1, SLC1A2, SLC1A3, SLC23A2, SLC1A6, SLC22A6, SLC1A1, AKR1C1, APBA1, OCA2, SLC6A12, CELSR3, SLC6A15, SLC26A8, FABP3, PLA2G5, CACNA1A	1244	147	13528	1.9234	0.99771	0.039717	3.31344
GOTERM_BP_FAT	GO:0048839~inner ear development	17	0.95991	0.00194619	KCNMA1, DFNA5, FGF9, OTX1, JAG2, SOBP, GJB6, NR4A3, SLC9A3R2, PROX1, PTPRQ, ATP2B2, KCNQ4, EYA1, MYO15A, FOXG1, COL11A1	1244	79	13528	2.3401	0.998325	0.0414457	3.48082
GOTERM_BP_FAT	GO:0007158~neuron adhesion	5	0.282326	0.00197823	CDK5R1, ASTN1, CTNND2, CNTN4, NCAN	1244	7	13528	7.76757	0.998492	0.0418428	3.53715
GOTERM_BP_FAT	GO:0051967~negative regulation of synaptic transmission, glutamatergic	5	0.282326	0.00197823	GRIK2, DRD2, GRIK3, ADORA1, HTR2A	1244	7	13528	7.76757	0.998492	0.0418428	3.53715
GOTERM_BP_FAT	GO:0051047~positive regulation of secretion	21	1.18577	0.00203239	SEPT5, EDN3, ACHE, STX1A, INS-IGF2, DRD2, NNAT, SNCA, NCS1, IGF2, TRH, ADORA1, INHBA, P2RX7, GCK, SAA1, INS, CRH, CARTPT, CHRNB2, AACS, SNAP25, SCAMP5	1244	109	13528	2.09511	0.998738	0.0426898	3.6323
GOTERM_BP_FAT	GO:0015849~organic acid transport	26	1.4681	0.00203792	SLC38A3, SLC6A1, DRD2, AQP8, PPARG, CACNB4, SLC7A5, SLCO2A1, SLC1A4, SLC32A1, SLC1A2, SLC1A3, SLC23A2, SLC1A6, SLC22A6, SLC1A1, AKR1C1, APBA1, OCA2, SLC6A12, CELSR3, SLC6A15, SLC26A8, FABP3, PLA2G5, CACNA1A	1244	148	13528	1.9104	0.998761	0.0425315	3.64201
GOTERM_BP_FAT	GO:0001964~startle response	7	0.395257	0.00212089	GLRB, DRD2, GRIN2D, GRIN1, GRIN3A, FABP7, CTNNA2	1244	16	13528	4.75764	0.999057	0.0439472	3.78761
GOTERM_BP_FAT	GO:0030072~peptide hormone secretion	11	0.621118	0.00220602	EDN3, CPLX3, CAMK2G, NEUROD1, RAPGEF4, CACNA1C, VGF, PCLO, FKBP1B, SNAP25, SMPD3	1244	39	13528	3.06719	0.999287	0.0453862	3.93677
GOTERM_BP_FAT	GO:0046883~regulation of hormone secretion	15	0.846979	0.00231739	EDN3, STX1A, DRD2, NNAT, NPY1R, TRH, ADORA1, KCNJ11, INHBA, GCK, CRH, IL1B, NEUROD1, AACS, SNAP25	1244	66	13528	2.4715	0.999506	0.0473285	4.13158
GOTERM_BP_FAT	GO:0045859~regulation of protein kinase activity	49	2.7668	0.00236428	ADCY3, EDN3, ADCY1, ADCY2, INS-IGF2, ADCY8, ADCY5, ADCY6, LPAR2, ZEB2, ADORA1, CAMKK2, PRKAR2B, MAP3K5, CERKL, MAP3K9, CDKN2D, IL1B, PAK1, NRG1, PICK1, GRM1, PKIA, THY1, GRM4, CCND2, CHRM1, ZFYVE28, GADD45G, MAP3K10, CARTPT, GAP43, PRKCZ, CDK5R1, CDK5R2, KIT, DGKE, PTK2B, INS, ADRA2A, ADRA2C, MET, LRRN3, IGF2, P2RX7, RGS4, PRKAR1B, MAPK8IP1, DUSP9, DUSP8, HTR2A	1244	345	13528	1.54451	0.999576	0.0479658	4.21349
GOTERM_BP_FAT	GO:0042592~homeostatic process	93	5.25127	0.00238321	JPH4, MCHR1, SLC9A6, SLC9A5, TRPV1, PDIA2, GRIK2, INS-IGF2, GRIK3, PPARG, SNCA, LPAR2, VGF, KCNJ11, ADORA1, MBP, ATP2B2, GRIN2C, SLC24A3, SAA1, SLC1A6, SERPINE1, SERPINA3, RGN, LTF, IL1B, LGI4, CHRNA4, SV2A, AKR1C1, MT3, KCNMA1, KCND2, CACNG2, PRKCB, SLC26A4, AMIGO1, INHBA, CLDN1, RYR1, RYR2, PDGFRB, CARTPT, GPR12, MON1A, CLDN16, TF, KCNMB4, PRKCZ, FTLP2, DRD2, TFR2, FKBP1A, CACNB4, CLDN11, FKBP1…	1244	751	13528	1.34665	0.999602	0.0480442	4.24653
GOTERM_BP_FAT	GO:0030029~actin filament-based process	37	2.08922	0.00241738	DLC1, MYO5A, PRKCZ, HRAS, MRAS, WASF1, ELN, LMO7, FHDC1, DAAM1, DAAM2, RHOU, KLHL1, CORO2B, TMSB15A, SORBS1, RAC3, PTK2B, ADRA2A, FMNL1, INF2, ARHGEF2, ACTC1, EVL, EPB49, GAS7, PROX1, ELMO1, TNNT2, PPP1R9B, FMN2, EPB41L1, RND1, EPS8, LIMCH1, FHOD3, ADD2	1244	241	13528	1.66954	0.999644	0.04842	4.30617
GOTERM_BP_FAT	GO:0006874~cellular calcium ion homeostasis	30	1.69396	0.00255683	JPH4, MCHR1, GRIK2, DRD2, LPAR2, FKBP1A, CACNB4, FKBP1B, ATP2B2, HRH3, SAA1, PTK2B, SLC24A3, RGN, IL1B, SV2A, SLC8A1, OPRL1, GRIN1, ATP1A2, NPY1R, ITPR1, PRKCB, P2RX7, CACNA1G, RYR1, RYR2, CACNA1C, GPR12, CACNA1A	1244	183	13528	1.78272	0.999775	0.0508344	4.54915
GOTERM_BP_FAT	GO:0006793~phosphorus metabolic process	116	6.54997	0.0026031	STK31, SNCA, LPAR2, PRKG2, ADORA1, CTTNBP2, MAP3K5, MAP3K9, IL1B, MATK, TYRO3, TNIK, PTPRN2, PICK1, PTPRR, PIM3, PTPRT, WNK2, PTPRN, CDKL2, PTPRO, MARK1, PTPRQ, CAMK4, MAPK4, MAPK9, PDGFRB, CARTPT, KALRN, FGFR2, FGFR4, CDK5R1, FGFR3, MVD, EPHA10, PXK, ATP6V1B2, ATP6V0B, CAMKV, EPHB6, DUSP13, SBK1, TTBK1, DUSP14, LMTK2, ADRA2A, LMTK3, ADRA2C, STK19, BMP2, PTPN3, PTPN5, MET, RPS6KL1, EPHA3, P2RX7, …	1244	973	13528	1.29646	0.999807	0.0514204	4.62965
GOTERM_BP_FAT	GO:0006796~phosphate metabolic process	116	6.54997	0.0026031	STK31, SNCA, LPAR2, PRKG2, ADORA1, CTTNBP2, MAP3K5, MAP3K9, IL1B, MATK, TYRO3, TNIK, PTPRN2, PICK1, PTPRR, PIM3, PTPRT, WNK2, PTPRN, CDKL2, PTPRO, MARK1, PTPRQ, CAMK4, MAPK4, MAPK9, PDGFRB, CARTPT, KALRN, FGFR2, FGFR4, CDK5R1, FGFR3, MVD, EPHA10, PXK, ATP6V1B2, ATP6V0B, CAMKV, EPHB6, DUSP13, SBK1, TTBK1, DUSP14, LMTK2, ADRA2A, LMTK3, ADRA2C, STK19, BMP2, PTPN3, PTPN5, MET, RPS6KL1, EPHA3, P2RX7, …	1244	973	13528	1.29646	0.999807	0.0514204	4.62965
GOTERM_BP_FAT	GO:0051051~negative regulation of transport	24	1.35517	0.00269374	EDN3, DRD2, INS-IGF2, SNCA, PXK, TRH, KCNJ11, ADORA1, PEA15, PACSIN1, HRH3, INS, IL1B, NEDD4L, NRG1, SCAMP5, GNAO1, CRYAB, IGF2, NPY1R, PKIA, INHBA, GRB10, GRM7, CALM3, CALM1, HTR2A	1244	135	13528	1.93326	0.999857	0.0528473	4.78714
GOTERM_BP_FAT	GO:0043549~regulation of kinase activity	50	2.82326	0.00284446	ADCY3, EDN3, ADCY1, ADCY2, INS-IGF2, ADCY8, ADCY5, ADCY6, LPAR2, ZEB2, ADORA1, CAMKK2, PRKAR2B, MAP3K5, CERKL, MAP3K9, CDKN2D, IL1B, PAK1, NRG1, PICK1, GRM1, PKIA, THY1, GRM4, CCND2, CHRM1, ZFYVE28, GADD45G, MAP3K10, CARTPT, GAP43, PRKCZ, CDK5R1, CDK5R2, KIT, DGKE, PTK2B, INS, ADRA2A, ADRA2C, MET, LRRN3, IGF2, VAV2, P2RX7, RGS4, PRKAR1B, MAPK8IP1, DUSP9, DUSP8, HTR2A	1244	357	13528	1.52305	0.999913	0.0553942	5.04848
GOTERM_BP_FAT	GO:0034311~diol metabolic process	10	0.564653	0.00286858	SNCB, EPAS1, DRD2, MAOA, SULT1A1, SNCA, SULT1A4, HPRT1, AOC2, MOXD1	1244	34	13528	3.19841	0.999919	0.0555224	5.09025
GOTERM_BP_FAT	GO:0009712~catechol metabolic process	10	0.564653	0.00286858	SNCB, EPAS1, DRD2, MAOA, SULT1A1, SNCA, SULT1A4, HPRT1, AOC2, MOXD1	1244	34	13528	3.19841	0.999919	0.0555224	5.09025
GOTERM_BP_FAT	GO:0006584~catecholamine metabolic process	10	0.564653	0.00286858	SNCB, EPAS1, DRD2, MAOA, SULT1A1, SNCA, SULT1A4, HPRT1, AOC2, MOXD1	1244	34	13528	3.19841	0.999919	0.0555224	5.09025
GOTERM_BP_FAT	GO:0048172~regulation of short-term neuronal synaptic plasticity	4	0.225861	0.00288324	SYP, PPFIA3, GRIK2, SYNGR1	1244	4	13528	10.8746	0.999923	0.0554718	5.11562
GOTERM_BP_FAT	GO:0015812~gamma-aminobutyric acid transport	4	0.225861	0.00288324	SLC6A1, CACNB4, CACNA1A, APBA1	1244	4	13528	10.8746	0.999923	0.0554718	5.11562
GOTERM_BP_FAT	GO:0006576~biogenic amine metabolic process	19	1.07284	0.0029275	ACHE, SNCB, EPAS1, DRD2, MAOA, SNCA, HPRT1, MOXD1, BBOX1, ATP2B2, BCHE, SULT1A1, FABP3, SMOX, SULT1A4, AOC2, ADC, PLA2G5, TPH2	1244	97	13528	2.13008	0.999934	0.0559726	5.19219
GOTERM_BP_FAT	GO:0030005~cellular di-, tri-valent inorganic cation homeostasis	35	1.97628	0.00300445	JPH4, MCHR1, TF, FTLP2, GRIK2, DRD2, TFR2, LPAR2, FKBP1A, CACNB4, FKBP1B, ATP2B2, HRH3, PTK2B, SAA1, SLC24A3, RGN, IL1B, LTF, SV2A, SLC8A1, OPRL1, GRIN1, ATP1A2, NPY1R, ITPR1, PRKCB, P2RX7, RYR1, CACNA1G, RYR2, CACNA1C, GPR12, CACNA1A, MON1A	1244	227	13528	1.6767	0.999948	0.0570713	5.32517
GOTERM_BP_FAT	GO:0055085~transmembrane transport	73	4.12196	0.00308121	KCNC2, SLC22A17, KCNC1, KCNC4, KCNAB3, SLC9A6, SLC9A5, KCNAB1, TRPV1, AQP4, CNGB1, AQP1, KCNQ4, SLC2A6, KCNQ3, SLC24A3, SLC23A2, SLC22A6, SV2B, NALCN, SV2A, KCNQ2, OCA2, KCNMA1, SVOP, KCND2, SCN2A, ABCC12, SLC26A4, SLC26A8, RYR1, RYR2, SERP2, SLC30A10, KCNH4, KCNA2, KCNA1, SFXN3, ATP6V1B2, ATP6V0B, SFXN5, SCN9A, SLC30A3, HCN4, SLC25A42, HCN3, HCN1, SLC8A1, SLC12A1, SLC8A2, TRPC3, KCNB1, CACNA1I, …	1244	569	13528	1.39516	0.99996	0.0581523	5.45765
GOTERM_BP_FAT	GO:0001508~regulation of action potential	15	0.846979	0.003104	KCNMA1, KCNMB4, PLP1, KCND2, GRIK2, CLDN11, MBP, KCNMB2, AMIGO1, P2RX7, CLDN1, LGI4, CHRNA4, CHRNB2, SCN8A	1244	68	13528	2.39881	0.999963	0.0582358	5.49694
GOTERM_BP_FAT	GO:0009628~response to abiotic stimulus	51	2.87973	0.00317482	HRAS, TRPV1, PPARG, CNGB1, VGF, ATP2B2, SLC1A2, PLEKHB1, SLC1A3, MC1R, CDKN2D, IL1B, COL11A1, RGR, TUBB3, KCNMA1, STS, STX1A, CRYAB, EYA3, EYA1, PEBP1, RAB3A, DRD2, KIT, BRSK1, TRH, ABCA4, SNN, PDE1B, PTK2B, TSC22D4, AGT, STRBP, DNMT3B, BMP2, TRPC3, GRIN1, ATP1A3, RCAN1, ATP1A2, SNAI2, ACCN2, P2RX7, DIO2, FYN, ADRA1B, CHRNB2, SCARA3, PCSK1N, CACNA1C, APBB1	1244	368	13528	1.50708	0.999971	0.0591886	5.61896
GOTERM_BP_FAT	GO:0032147~activation of protein kinase activity	21	1.18577	0.00350114	ADCY3, PRKCZ, ADCY1, ADCY2, INS-IGF2, ADCY8, ADCY5, ADCY6, PICK1, IGF2, ADORA1, GRM1, PRKAR2B, CERKL, DGKE, INS, PTK2B, CHRM1, PRKAR1B, GADD45G, CARTPT, NRG1, GAP43	1244	114	13528	2.00322	0.99999	0.0647145	6.17927
GOTERM_BP_FAT	GO:0018958~phenol metabolic process	10	0.564653	0.00355227	SNCB, EPAS1, DRD2, MAOA, SULT1A1, SNCA, SULT1A4, HPRT1, AOC2, MOXD1	1244	35	13528	3.10703	0.999992	0.0652628	6.26678
GOTERM_BP_FAT	GO:0051924~regulation of calcium ion transport	15	0.846979	0.00357235	MCHR1, JPH4, CACNA2D1, SLC8A1, GNAO1, DRD2, FKBP1A, CACNB4, FKBP1B, THY1, ATP2B2, P2RX7, SLN, CALM3, RYR2, CALM1	1244	69	13528	2.36404	0.999992	0.0652554	6.30112
GOTERM_BP_FAT	GO:0031000~response to caffeine	5	0.282326	0.00366934	GNAL, PPARG, RYR1, RYR2, FKBP1A	1244	8	13528	6.79662	0.999994	0.0666	6.46686
GOTERM_BP_FAT	GO:0055074~calcium ion homeostasis	30	1.69396	0.00382037	JPH4, MCHR1, GRIK2, DRD2, LPAR2, FKBP1A, CACNB4, FKBP1B, ATP2B2, HRH3, SAA1, PTK2B, SLC24A3, RGN, IL1B, SV2A, SLC8A1, OPRL1, GRIN1, ATP1A2, NPY1R, ITPR1, PRKCB, P2RX7, CACNA1G, RYR1, RYR2, CACNA1C, GPR12, CACNA1A	1244	188	13528	1.73531	0.999996	0.0688695	6.72436
GOTERM_BP_FAT	GO:0010035~response to inorganic substance	32	1.80689	0.00386839	KCNMB4, SYT1, SLC6A1, SNCA, KCNIP2, KCNIP1, KCNMB2, CRYGD, SLC1A3, PTK2B, SERPINE1, GPX3, NEDD4L, MT3, KCNMA1, SLC8A1, GNAO1, S100A16, GATM, CYP1A1, CRYAB, EEF1A2, LEF1, GRIA3, TNNT2, P2RX7, NPTXR, CACNA1G, CALM3, PEBP1, MAPK9, RYR2, CALM1	1244	205	13528	1.6975	0.999997	0.0693261	6.8061
GOTERM_BP_FAT	GO:0010769~regulation of cell morphogenesis involved in differentiation	16	0.903444	0.00393004	MAG, PLXNA3, LZTS1, GRIN1, RTN4R, LRRC4C, THY1, MBP, AMIGO1, NRCAM, LINGO1, YWHAH, MAPT, CHRNB2, ROBO2, CACNA1A	1244	77	13528	2.25966	0.999998	0.0700119	6.91095
GOTERM_BP_FAT	GO:0051338~regulation of transferase activity	51	2.87973	0.00395184	ADCY3, EDN3, ADCY1, ADCY2, INS-IGF2, ADCY8, ADCY5, ADCY6, PPARG, LPAR2, ZEB2, ADORA1, CAMKK2, PRKAR2B, MAP3K5, CERKL, MAP3K9, CDKN2D, IL1B, PAK1, NRG1, PICK1, GRM1, PKIA, THY1, GRM4, CCND2, CHRM1, GADD45G, ZFYVE28, MAP3K10, CARTPT, GAP43, PRKCZ, CDK5R1, CDK5R2, KIT, DGKE, PTK2B, INS, ADRA2A, ADRA2C, MET, LRRN3, IGF2, VAV2, P2RX7, RGS4, PRKAR1B, MAPK8IP1, DUSP9, DUSP8, HTR2A	1244	372	13528	1.49087	0.999998	0.0700078	6.94798
GOTERM_BP_FAT	GO:0046777~protein amino acid autophosphorylation	17	0.95991	0.0042136	CAMK2G, MET, KIT, CAMKK2, CTTNBP2, ACVR1B, FYN, MAP3K9, MAPK15, NTRK2, LMTK2, MAP3K10, LMTK3, PDGFRB, CAMK2B, PAK1, CAMK2A	1244	85	13528	2.17492	0.999999	0.0740794	7.39171
GOTERM_BP_FAT	GO:0050770~regulation of axonogenesis	13	0.734049	0.00494545	MAG, PLXNA3, GRIN1, RTN4R, LRRC4C, THY1, MBP, NRCAM, AMIGO1, LINGO1, MAPT, ROBO2, CACNA1A	1244	57	13528	2.48017	1	0.0859491	8.62173
GOTERM_BP_FAT	GO:0051129~negative regulation of cellular component organization	24	1.35517	0.00514886	DLC1, MAG, PRKCZ, ARHGEF2, PLXNA3, SHROOM2, CLU, SPTBN4, SNCA, RTN4R, EPB49, MBP, THY1, LINGO1, PACSIN1, YWHAH, TMSB15A, MAPT, SPTBN2, DNMT3B, ADD2, SPTB, MAP6D1, SCAMP5	1244	142	13528	1.83796	1	0.0888618	8.96083
GOTERM_BP_FAT	GO:0009719~response to endogenous stimulus	54	3.04912	0.00528583	ADCY3, ADCY1, THRA, ADCY2, SLC6A1, INS-IGF2, ADCY8, ADCY5, ADCY6, ARNT2, PPARG, VGF, AQP1, GNG8, CTTNBP2, PRKAR2B, SLC1A2, IL1B, GNG2, GNG4, GNG7, KCNMA1, STS, GATM, CRYAB, BAIAP2, PTPRN, GNAL, GRB10, CCND2, PEBP1, DRD2, ALDOC, FHL2, TRH, HPRT1, ALDH1A2, SORBS1, BCHE, INS, PTK2B, PPP3CA, GNAO1, GRIN1, IGF2, RCAN1, NR4A3, NPY1R, HDAC5, PRKAR1B, MAPK15, ADRA1B, FABP3, HDAC9, AACS, ABCC5	1244	405	13528	1.44995	1	0.090646	9.18852
GOTERM_BP_FAT	GO:0043583~ear development	18	1.01637	0.00553391	KCNMA1, DFNA5, SHROOM2, FGF9, OTX1, JAG2, SOBP, GJB6, NR4A3, PROX1, SLC9A3R2, PTPRQ, ATP2B2, KCNQ4, EYA1, MYO15A, FOXG1, COL11A1	1244	95	13528	2.06045	1	0.0942138	9.59952
GOTERM_BP_FAT	GO:0021537~telencephalon development	14	0.790514	0.00556704	PLXNA3, EMX1, DRD2, GRIN1, BCAN, LEF1, ZEB2, HPRT1, SALL3, DLX1, SLC1A2, LHX2, POU3F3, LHX6	1244	65	13528	2.34222	1	0.0942646	9.65428
GOTERM_BP_FAT	GO:0051966~regulation of synaptic transmission, glutamatergic	7	0.395257	0.0056539	GRIK2, DRD2, GRIK3, NTRK2, ADORA1, GRM1, HTR2A	1244	19	13528	4.00643	1	0.0951775	9.79768
GOTERM_BP_FAT	GO:0048488~synaptic vesicle endocytosis	6	0.338792	0.00641772	SYP, RAB3A, SNCA, STXBP1, BIN1, AMPH	1244	14	13528	4.66054	1	0.106818	11.0495
GOTERM_BP_FAT	GO:0006171~cAMP biosynthetic process	6	0.338792	0.00641772	ADCY3, ADCY1, ADCY2, ADCY8, ADCY5, ADCY6	1244	14	13528	4.66054	1	0.106818	11.0495
GOTERM_BP_FAT	GO:0051282~regulation of sequestering of calcium ion	6	0.338792	0.00641772	P2RX7, DRD2, RYR1, RYR2, FKBP1A, FKBP1B	1244	14	13528	4.66054	1	0.106818	11.0495
GOTERM_BP_FAT	GO:0051209~release of sequestered calcium ion into cytosol	6	0.338792	0.00641772	P2RX7, DRD2, RYR1, RYR2, FKBP1A, FKBP1B	1244	14	13528	4.66054	1	0.106818	11.0495
GOTERM_BP_FAT	GO:0051283~negative regulation of sequestering of calcium ion	6	0.338792	0.00641772	P2RX7, DRD2, RYR1, RYR2, FKBP1A, FKBP1B	1244	14	13528	4.66054	1	0.106818	11.0495
GOTERM_BP_FAT	GO:0046879~hormone secretion	11	0.621118	0.00668253	EDN3, CPLX3, CAMK2G, NEUROD1, RAPGEF4, CACNA1C, VGF, PCLO, FKBP1B, SNAP25, SMPD3	1244	45	13528	2.65824	1	0.110429	11.4797
GOTERM_BP_FAT	GO:0055066~di-, tri-valent inorganic cation homeostasis	35	1.97628	0.00678495	JPH4, MCHR1, TF, FTLP2, GRIK2, DRD2, TFR2, LPAR2, FKBP1A, CACNB4, FKBP1B, ATP2B2, HRH3, PTK2B, SAA1, SLC24A3, RGN, IL1B, LTF, SV2A, SLC8A1, OPRL1, GRIN1, ATP1A2, NPY1R, ITPR1, PRKCB, P2RX7, RYR1, CACNA1G, RYR2, CACNA1C, GPR12, CACNA1A, MON1A	1244	239	13528	1.59251	1	0.11147	11.6455
GOTERM_BP_FAT	GO:0006928~cell motion	61	3.44438	0.00681343	EDN3, PLXNA3, WASF1, ZEB2, MYLIP, NRCAM, CTTNBP2, UNC5A, SAA1, SPINT2, IL1B, ROBO2, NR2F1, SATB2, EFNB3, ARHGEF7, NRXN3, KIF5C, NRXN1, TBR1, SLIT1, ELMO1, CTNNA2, IGSF8, FOXG1, CELF3, PDGFRB, CNTN4, C1ORF187, GAP43, DCC, PALM, CDK5R1, SHROOM2, DRD2, ASTN1, SPOCK1, KIT, MYCBP2, ROPN1B, PTK2B, LHX2, ADRA2A, TEKT2, POU3F3, LHX6, STRBP, DCX, DCLK1, SCG2, KLF7, MET, NFASC, VAV2, LAMA1, SEMA6C, NPY, FY…	1244	475	13528	1.39653	1	0.111357	11.6916
GOTERM_BP_FAT	GO:0010038~response to metal ion	22	1.24224	0.00688954	KCNMA1, SYT1, KCNMB4, S100A16, CYP1A1, GATM, SLC6A1, SNCA, LEF1, GRIA3, KCNIP2, KCNIP1, KCNMB2, TNNT2, P2RX7, PTK2B, CACNA1G, CALM3, PEBP1, RYR2, MAPK9, NEDD4L, CALM1	1244	129	13528	1.85458	1	0.111977	11.8146
GOTERM_BP_FAT	GO:0016310~phosphorylation	95	5.3642	0.00696986	STK31, SNCA, LPAR2, PRKG2, ADORA1, CAMKK1, CAMKK2, PAK6, ACVR1B, PAK7, CTTNBP2, MAP3K5, MAP3K9, IL1B, PAK1, TIE1, MATK, TYRO3, CAMK1G, TNIK, PIK3C2B, PICK1, PRKCG, PIM3, WNK2, PRKCE, GRM1, CDKL2, MARK1, PRKCB, MAST3, GRM4, ACVR2A, MAST1, STYK1, MAST2, CAMK4, MAPK4, GADD45G, MAP3K10, MAPK9, PDGFRB, CARTPT, KALRN, FGFR2, PRKCZ, CDK5R1, FGFR4, FGFR3, MVD, CAMK2G, BRSK2, EPHA10, BRSK1, PXK, KIT, ATP6…	1244	800	13528	1.29136	1	0.112655	11.9442
GOTERM_BP_FAT	GO:0007416~synaptogenesis	9	0.508187	0.00705673	NRCAM, ACHE, NRXN3, SPOCK2, DRD2, GLRA2, NLGN2, NRXN1, CACNA1A	1244	32	13528	3.05848	1	0.113425	12.0842
GOTERM_BP_FAT	GO:0033555~multicellular organismal response to stress	10	0.564653	0.00764304	PENK, GRIK2, TRPV1, GRM7, GABRA5, ADRA2A, SCN9A, CACNA1A, GNG7, KCNIP3	1244	39	13528	2.78836	1	0.121692	13.0235
GOTERM_BP_FAT	GO:0002791~regulation of peptide secretion	11	0.621118	0.00785255	STX1A, GCK, DRD2, NNAT, IL1B, NEUROD1, TRH, AACS, ADORA1, KCNJ11, SNAP25	1244	46	13528	2.60045	1	0.124225	13.3569
GOTERM_BP_FAT	GO:0007156~homophilic cell adhesion	22	1.24224	0.00821056	CADM3, CLSTN3, PCDH20, PCDH11X, CDHR1, CELSR3, PCDH8, CELSR2, PTPRT, PCDH17, PCDH19, DCHS1, AMIGO1, CDH22, CDH8, CDH20, FAT3, CDH18, FAT2, ROBO2, CDH10, CDH24	1244	131	13528	1.82627	1	0.12891	13.9237
GOTERM_BP_FAT	GO:0006164~purine nucleotide biosynthetic process	24	1.35517	0.00852008	ADCY3, ATP1B1, ADCY1, ADCY2, ATP10B, ATP1B2, ADCY8, ADCY5, ADCY6, ATP1A3, AK5, ATP1A2, ATP6V1B2, HPRT1, ATP6V0B, ATP2B2, ATP2B3, ATP6V0E2, ATP8A2, GUCY1A2, GUCY1A3, GUCY1B3, NT5E, ATP8A1	1244	148	13528	1.76345	1	0.13282	14.4109
GOTERM_BP_FAT	GO:0032409~regulation of transporter activity	9	0.508187	0.00858107	JPH4, INS-IGF2, INS, DRD2, SNCA, CALM3, FKBP1A, IGF2, CACNB4, FKBP1B, SYNGR3, CALM1	1244	33	13528	2.9658	1	0.13308	14.5066
GOTERM_BP_FAT	GO:0050773~regulation of dendrite development	6	0.338792	0.00890841	LZTS1, YWHAH, GRIN1, NTRK2, CHRNB2, KALRN	1244	15	13528	4.34984	1	0.137168	15.0185
GOTERM_BP_FAT	GO:0019228~regulation of action potential in neuron	12	0.677583	0.00900636	AMIGO1, KCNMA1, KCNMB4, P2RX7, PLP1, GRIK2, CLDN1, LGI4, SCN8A, CLDN11, KCNMB2, MBP	1244	54	13528	2.41658	1	0.13793	15.1711
GOTERM_BP_FAT	GO:0015833~peptide transport	12	0.677583	0.00900636	EDN3, CPLX3, TRPV1, CAMK2G, NEUROD1, RAPGEF4, CACNA1C, VGF, PCLO, FKBP1B, SNAP25, SMPD3	1244	54	13528	2.41658	1	0.13793	15.1711
GOTERM_BP_FAT	GO:0048585~negative regulation of response to stimulus	18	1.01637	0.00929545	PRKCZ, MASP1, DRD2, INS-IGF2, PPARG, GRIN1, IGF2, GRIN3A, ADORA1, CTNNA2, GRB10, SAA1, INS, CRH, CARTPT, IL1B, MAPK8IP1, FABP7, NT5E, GRB14	1244	100	13528	1.95743	1	0.141392	15.62
GOTERM_BP_FAT	GO:0030073~insulin secretion	8	0.451722	0.00934706	CPLX3, CAMK2G, NEUROD1, RAPGEF4, CACNA1C, VGF, PCLO, FKBP1B	1244	27	13528	3.2221	1	0.141471	15.6999
GOTERM_BP_FAT	GO:0060134~prepulse inhibition	5	0.282326	0.00947601	DRD2, GRIN1, GRIN3A, FABP7, CTNNA2	1244	10	13528	5.4373	1	0.142631	15.8993
GOTERM_BP_FAT	GO:0007413~axonal fasciculation	5	0.282326	0.00947601	AMIGO1, NRCAM, CDK5R1, CELSR3, CNTN4	1244	10	13528	5.4373	1	0.142631	15.8993
GOTERM_BP_FAT	GO:0046058~cAMP metabolic process	7	0.395257	0.00964582	ADCY3, ADCY1, ADCY2, ADCY8, ADCY5, ADCY6, CACNB4	1244	21	13528	3.62487	1	0.144347	16.1611
GOTERM_BP_FAT	GO:0032870~cellular response to hormone stimulus	22	1.24224	0.0097301	ADCY3, ADCY1, ADCY2, THRA, INS-IGF2, ADCY8, BAIAP2, ADCY5, ADCY6, PPARG, IGF2, TRH, HDAC5, GNG8, PRKAR2B, GRB10, SORBS1, CCND2, INS, PRKAR1B, GNG2, HDAC9, GNG4, GNG7	1244	133	13528	1.79881	1	0.144861	16.2908
GOTERM_BP_FAT	GO:0015698~inorganic anion transport	17	0.95991	0.0102013	GABRG2, GLRB, GABRA2, GABRG3, SLC12A1, GABRA1, GABRA4, GABRA3, GLRA2, GABRA5, CELSR3, SLC17A7, SLC26A4, CTTNBP2, SLC4A10, SLC26A8, CLCN4	1244	93	13528	1.98783	1	0.150674	17.0121
GOTERM_BP_FAT	GO:0043408~regulation of MAPKKK cascade	19	1.07284	0.0102093	INS-IGF2, FGF9, GRIK2, IGF2, ZEB2, LPAR2, TIMP2, GRM1, GRM4, P2RX7, MAP3K5, INS, PTK2B, MAP3K9, AGT, MAPK8IP2, MAP3K10, PEBP1, IL1B, PAK1, MAPK8IP1	1244	109	13528	1.89557	1	0.150112	17.0243
GOTERM_BP_FAT	GO:0044087~regulation of cellular component biogenesis	23	1.2987	0.0102866	DLC1, PRKCZ, ACTR3B, CLU, ELN, SPTBN4, GRIN1, STXBP1, KIT, EPB49, PROX1, CTTNBP2, TMSB15A, MAPT, TPPP, SPTBN2, CHRNB2, MDN1, SNAP25, ARHGEF10L, ADD2, SPTB, SYNPO	1244	142	13528	1.76138	1	0.150495	17.1421
GOTERM_BP_FAT	GO:0019229~regulation of vasoconstriction	9	0.508187	0.0103388	KCNMB4, EDN3, CHRM3, AGT, ATP1A2, NPY1R, CACNA1C, KCNMB2, HTR2A	1244	34	13528	2.87857	1	0.150535	17.2215
GOTERM_BP_FAT	GO:0051048~negative regulation of secretion	12	0.677583	0.0103485	EDN3, DRD2, INS-IGF2, IGF2, NPY1R, TRH, ADORA1, KCNJ11, INHBA, HRH3, INS, GRM7, IL1B, NRG1	1244	55	13528	2.37264	1	0.150005	17.2363
GOTERM_BP_FAT	GO:0007190~activation of adenylate cyclase activity	12	0.677583	0.0103485	CRHR1, ADCY3, GNAL, ADCY1, CAP2, ADCY2, ADCY8, ADCY5, ADCYAP1R1, ADCY6, NTRK2, GPR3	1244	55	13528	2.37264	1	0.150005	17.2363
GOTERM_BP_FAT	GO:0007517~muscle organ development	31	1.75042	0.0106084	MEF2C, AEBP1, ACHE, MRAS, FHL1, ELN, CACNB2, FKBP1A, MOV10L1, CACNB4, TAGLN3, GJC1, DMD, PPP3CA, MKL2, NRG1, COL11A1, ACTC1, CRYAB, MET, RCAN1, CACNG2, CSRP2, PROX1, TNNT2, IGSF8, ITGA7, CACNA1H, PDGFRB, HBEGF, SNTA1	1244	211	13528	1.59769	1	0.152818	17.6308
GOTERM_BP_FAT	GO:0010817~regulation of hormone levels	24	1.35517	0.0107816	CPLX3, EDN3, CYP1A1, CAMK2G, CRHBP, VGF, FKBP1B, PCLO, PCSK2, ALDH1A2, YWHAH, DIO2, CPE, AGT, CHST8, CRH, NEUROD1, RAPGEF4, SRD5A1, CACNA1C, PCSK1N, SNAP25, SMPD3, CACNA1A	1244	151	13528	1.72841	1	0.154448	17.8925
GOTERM_BP_FAT	GO:0051480~cytosolic calcium ion homeostasis	20	1.12931	0.0110342	MCHR1, JPH4, SLC8A1, OPRL1, DRD2, FKBP1A, LPAR2, ATP1A2, NPY1R, FKBP1B, P2RX7, HRH3, SAA1, PTK2B, CACNA1G, RYR1, RYR2, IL1B, CACNA1C, CACNA1A	1244	118	13528	1.84315	1	0.157104	18.273
GOTERM_BP_FAT	GO:0010243~response to organic nitrogen	13	0.734049	0.0112082	GNAO1, SLC6A1, DRD2, ALDOC, GRIN1, HPRT1, GNAL, SLC1A2, PTK2B, ADRA1B, PEBP1, PPP3CA, AACS	1244	63	13528	2.24396	1	0.158704	18.5342
GOTERM_BP_FAT	GO:0043406~positive regulation of MAP kinase activity	18	1.01637	0.011278	EDN3, LRRN3, MET, ZEB2, LPAR2, KIT, GRM1, GRM4, P2RX7, MAP3K5, PTK2B, MAP3K9, MAP3K10, ADRA2A, IL1B, ADRA2C, PAK1, HTR2A	1244	102	13528	1.91905	1	0.158934	18.6386
GOTERM_BP_FAT	GO:0045762~positive regulation of adenylate cyclase activity	12	0.677583	0.0118388	CRHR1, ADCY3, GNAL, ADCY1, CAP2, ADCY2, ADCY8, ADCY5, ADCYAP1R1, ADCY6, NTRK2, GPR3	1244	56	13528	2.33027	1	0.165483	19.4738
GOTERM_BP_FAT	GO:0042472~inner ear morphogenesis	12	0.677583	0.0118388	ATP2B2, EYA1, KCNQ4, FGF9, MYO15A, OTX1, FOXG1, SOBP, NR4A3, PROX1, COL11A1, PTPRQ	1244	56	13528	2.33027	1	0.165483	19.4738
GOTERM_BP_FAT	GO:0009914~hormone transport	11	0.621118	0.0123199	EDN3, CPLX3, CAMK2G, NEUROD1, RAPGEF4, CACNA1C, VGF, PCLO, FKBP1B, SNAP25, SMPD3	1244	49	13528	2.44124	1	0.170914	20.1838
GOTERM_BP_FAT	GO:0033500~carbohydrate homeostasis	11	0.621118	0.0123199	INS-IGF2, PPARG, IGF2, VGF, GCKR, GCK, INS, SERPINE1, ADRA1B, NEUROD1, CARTPT, CACNA1E, CACNA1C	1244	49	13528	2.44124	1	0.170914	20.1838
GOTERM_BP_FAT	GO:0042593~glucose homeostasis	11	0.621118	0.0123199	INS-IGF2, PPARG, IGF2, VGF, GCKR, GCK, INS, SERPINE1, ADRA1B, NEUROD1, CARTPT, CACNA1E, CACNA1C	1244	49	13528	2.44124	1	0.170914	20.1838
GOTERM_BP_FAT	GO:0051050~positive regulation of transport	32	1.80689	0.0129429	SEPT5, EDN3, MCHR1, PRKCZ, ACHE, DRD2, INS-IGF2, NNAT, SNCA, NCS1, TRH, ADORA1, ATP2B2, SLC1A2, SORBS1, SAA1, INS, IL1B, NEDD4L, SNAP25, SCAMP5, HIP1, STX1A, IGF2, SYNGR3, THY1, INHBA, P2RX7, GCK, CRH, CALM3, CARTPT, CHRNB2, AACS, CALM1	1244	223	13528	1.56048	1	0.178044	21.0945
GOTERM_BP_FAT	GO:0031281~positive regulation of cyclase activity	12	0.677583	0.0134872	CRHR1, ADCY3, GNAL, ADCY1, CAP2, ADCY2, ADCY8, ADCY5, ADCYAP1R1, ADCY6, NTRK2, GPR3	1244	57	13528	2.28939	1	0.184078	21.8821
GOTERM_BP_FAT	GO:0007169~transmembrane receptor protein tyrosine kinase signaling pathway	32	1.80689	0.0137445	FGFR2, FGFR4, FGFR3, INS-IGF2, GRIK2, FGF9, ADCYAP1R1, EPHA10, KIT, EPHB6, SORBS1, INS, PTK2B, TIE1, NRG1, CNKSR1, EFNB3, BAIAP2, PICK1, MET, IGF2, PTPRT, FGF22, EPHA3, GRB10, DOK4, EPS8, DOK5, NTRK2, MAPK8IP2, PDGFRB, HBEGF, GFRA2, CACNA1A	1244	224	13528	1.55351	1	0.186494	22.2518
GOTERM_BP_FAT	GO:0007567~parturition	5	0.282326	0.0138216	CRHR1, CYP1A1, RXFP1, CRH, PLA2G4C	1244	11	13528	4.943	1	0.186678	22.3622
GOTERM_BP_FAT	GO:0014059~regulation of dopamine secretion	5	0.282326	0.0138216	DRD2, SNCA, CHRNA4, CHRNB2, HTR2A	1244	11	13528	4.943	1	0.186678	22.3622
GOTERM_BP_FAT	GO:0051094~positive regulation of developmental process	38	2.14568	0.0138635	ZNF488, THRB, INS-IGF2, FGF9, DRD2, CLU, PPARG, KIT, NRCAM, ACVR1B, INS, MAPT, AGT, RHOB, IL1B, ROBO2, HSF4, MKL2, NRG1, DDAH1, DNMT3B, ANGPTL4, LPL, BMP2, TESC, SMAD9, IGF2, VASH2, PROX1, AMIGO1, INHBA, ACVR2A, P2RX7, F3, FOXG1, HOPX, NEUROD1, MAPK9, WNT9A, HDAC9	1244	278	13528	1.48646	1	0.186432	22.4222
GOTERM_BP_FAT	GO:0032102~negative regulation of response to external stimulus	11	0.621118	0.014168	DRD2, INS-IGF2, PPARG, GRIN1, IGF2, GRIN3A, ADORA1, CTNNA2, INS, SAA1, CARTPT, FABP7, NT5E	1244	50	13528	2.39241	1	0.189371	22.8568
GOTERM_BP_FAT	GO:0009416~response to light stimulus	22	1.24224	0.0145328	HRAS, TRPC3, DRD2, GRIN1, ATP1A3, CNGB1, ATP1A2, KIT, BRSK1, ABCA4, SLC1A2, SLC1A3, PLEKHB1, MC1R, PDE1B, CDKN2D, ADRA1B, CHRNB2, SCARA3, CACNA1C, APBB1, RGR, TUBB3	1244	138	13528	1.73363	1	0.192998	23.3743
GOTERM_BP_FAT	GO:0046887~positive regulation of hormone secretion	9	0.508187	0.014633	EDN3, INHBA, GCK, DRD2, NNAT, CRH, TRH, AACS, SNAP25	1244	36	13528	2.71865	1	0.193425	23.5158
GOTERM_BP_FAT	GO:0002793~positive regulation of peptide secretion	7	0.395257	0.0153178	GCK, DRD2, NNAT, TRH, AACS, ADORA1, SNAP25	1244	23	13528	3.30966	1	0.200765	24.4768
GOTERM_BP_FAT	GO:0060078~regulation of postsynaptic membrane potential	7	0.395257	0.0153178	GRIK2, GRIN2C, SNCA, GRIN1, CHRNA4, PPP3CA, ADORA1	1244	23	13528	3.30966	1	0.200765	24.4768
GOTERM_BP_FAT	GO:0042471~ear morphogenesis	13	0.734049	0.0160445	FGF9, OTX1, SOBP, GJB6, NR4A3, PROX1, PTPRQ, ATP2B2, KCNQ4, EYA1, MYO15A, FOXG1, COL11A1	1244	66	13528	2.14197	1	0.208467	25.484
GOTERM_BP_FAT	GO:0009123~nucleoside monophosphate metabolic process	13	0.734049	0.0160445	ADCY3, ADCY1, ADCY2, ADCY8, ADCY5, ADCY6, CACNB4, ATP2B2, PDE4A, GUCY1A2, GUCY1A3, GUCY1B3, NT5E	1244	66	13528	2.14197	1	0.208467	25.484
GOTERM_BP_FAT	GO:0015711~organic anion transport	10	0.564653	0.0169097	SLC4A10, SLC1A2, SLCO1A2, SLC1A3, SLC26A8, SLC1A6, CELSR3, SLC22A6, SLC1A1, OCA2	1244	44	13528	2.4715	1	0.217622	26.6666
GOTERM_BP_FAT	GO:0007166~cell surface receptor linked signal transduction	197	11.1237	0.0171473	ADCY3, EDN3, HRAS, ADCY1, ADCY2, ADCY8, GPR123, ADCY5, ADCY6, LPAR2, GRIN3A, ADORA1, GNG8, MC1R, GRIN2C, GNG2, RAPGEF4, GNG4, GNG7, WNT10B, EFNB3, GPR133, PTPRT, THY1, CRHR1, SSTR2, GRB10, SSTR1, PDGFRB, CDK5R1, GNAI1, CACNB3, CACNB4, SORCS2, ADAP1, ITGBL1, EPHB6, INS, BAI1, BAI3, OR2T8, GPR156, CNKSR1, BMP2, SMAD9, CELSR3, CELSR2, COL16A1, KCNK2, PORCN, EPHA3, GPR153, LAMA1, PENK, EPS8, NPY, NTR…	1244	1856	13528	1.15425	1	0.219491	26.9882
GOTERM_BP_FAT	GO:0006575~cellular amino acid derivative metabolic process	25	1.41163	0.0171574	ACHE, SNCB, DRD2, SNCA, HPRT1, BBOX1, ATP2B2, SLC1A3, BCHE, SULT1A1, GPX3, SMOX, SULT1A4, DNMT3B, CYP1A1, GATM, EPAS1, MAOA, GSTT1, MOXD1, FABP3, AOC2, ADC, PLA2G5, TPH2	1244	166	13528	1.63774	1	0.218764	27.0019
GOTERM_BP_FAT	GO:0051349~positive regulation of lyase activity	12	0.677583	0.0172975	CRHR1, ADCY3, GNAL, ADCY1, CAP2, ADCY2, ADCY8, ADCY5, ADCYAP1R1, ADCY6, NTRK2, GPR3	1244	59	13528	2.21178	1	0.21951	27.1909
GOTERM_BP_FAT	GO:0010033~response to organic substance	84	4.74308	0.0177208	ADCY3, ADCY1, ADCY2, THRA, SLC6A1, ADCY8, INS-IGF2, ADCY5, SNCA, PPARG, ARNT2, ADCY6, GRIN3A, VGF, AQP1, KCNJ11, GNG8, HSPH1, PRKAR2B, CTTNBP2, SLC1A2, CREB3L1, CHRNA4, IL1B, SLC22A6, GNG2, GNG4, GNG7, KCNMA1, STS, CYP1A1, GATM, CRYAB, BAIAP2, LEF1, PTPRN, GNAL, GRB10, GRM2, CCND2, RYR1, RYR2, PEBP1, PLA2G5, TF, DRD2, ALDOC, NNAT, FHL2, FKBP1A, TRH, HPRT1, FKBP1B, ALDH1A2, HRH3, SORBS1, BCHE, INS…	1244	721	13528	1.26694	1	0.223423	27.7592
GOTERM_BP_FAT	GO:0043405~regulation of MAP kinase activity	22	1.24224	0.0182107	EDN3, LRRN3, MET, ZEB2, LPAR2, KIT, GRM1, GRM4, P2RX7, MAP3K5, PTK2B, MAP3K9, RGS4, MAP3K10, ADRA2A, IL1B, ADRA2C, MAPK8IP1, PAK1, DUSP9, DUSP8, HTR2A	1244	141	13528	1.69675	1	0.228021	28.4115
GOTERM_BP_FAT	GO:0048469~cell maturation	14	0.790514	0.0183062	KCNMA1, SOX10, PLP1, EPAS1, PICK1, PPARG, KCNIP2, SOX8, NRCAM, RND1, PTK2B, HBZ, LGI4, LHX6	1244	75	13528	2.02992	1	0.22822	28.5381
GOTERM_BP_FAT	GO:0006470~protein amino acid dephosphorylation	21	1.18577	0.0189363	PTPRE, PTPN3, PTPN5, PTPRN2, PTPRR, PTPRT, PTPRN, PTPRO, PTPRQ, DUSP5, EYA3, EYA1, DUSP26, DUSP13, PPEF1, PPM1K, DUSP14, PPP3CA, DUSP9, DUSP8, DUSP7	1244	133	13528	1.71704	1	0.234264	29.3677
GOTERM_BP_FAT	GO:0021952~central nervous system projection neuron axonogenesis	5	0.282326	0.0192491	DCC, CHRNB2, DCX, DCLK1, MYCBP2	1244	12	13528	4.53108	1	0.236788	29.7761
GOTERM_BP_FAT	GO:0030902~hindbrain development	12	0.677583	0.0194787	DLC1, ATP2B2, ALDH1A2, SMAD9, GRIN1, MYO16, NEUROD1, TBR1, CACNA1A, KLHL1, NFIB, CTNNA2	1244	60	13528	2.17492	1	0.238391	30.0746
GOTERM_BP_FAT	GO:0043112~receptor metabolic process	8	0.451722	0.0200602	GRIK2, GRIA1, DMD, SNCA, PICK1, PPARG, GRK4, CACNA1A	1244	31	13528	2.80635	1	0.243729	30.8249
GOTERM_BP_FAT	GO:0060073~micturition	4	0.225861	0.0204182	KCNMA1, TRPV1, CHRNB2, CACNA1C	1244	7	13528	6.21406	1	0.246633	31.283
GOTERM_BP_FAT	GO:0015810~aspartate transport	4	0.225861	0.0204182	SLC1A2, SLC1A3, SLC1A6, SLC1A1	1244	7	13528	6.21406	1	0.246633	31.283
GOTERM_BP_FAT	GO:0007623~circadian rhythm	10	0.564653	0.0222915	KCNMA1, CRY2, PTGDS, DRD2, HS3ST2, CRH, CARTPT, PER1, CHRNB2, ARNTL	1244	46	13528	2.36404	1	0.265225	33.634
GOTERM_BP_FAT	GO:0007204~elevation of cytosolic calcium ion concentration	18	1.01637	0.0227371	MCHR1, JPH4, SLC8A1, OPRL1, DRD2, FKBP1A, LPAR2, FKBP1B, P2RX7, HRH3, SAA1, PTK2B, CACNA1G, RYR1, RYR2, IL1B, CACNA1C, CACNA1A	1244	110	13528	1.77948	1	0.268837	34.182
GOTERM_BP_FAT	GO:0031646~positive regulation of neurological system process	9	0.508187	0.0233065	TF, PRKCZ, SLC1A3, GRIK2, SNCA, NTRK2, CARTPT, CHRNB2, LGI1	1244	39	13528	2.50952	1	0.273652	34.8759
GOTERM_BP_FAT	GO:0009593~detection of chemical stimulus	8	0.451722	0.0237012	KCNMB4, SYT1, GCK, TRPV1, RYR2, KCNIP2, KCNIP1, KCNMB2	1244	32	13528	2.71865	1	0.276655	35.3529
GOTERM_BP_FAT	GO:0070779~D-aspartate import	3	0.169396	0.0237612	SLC1A2, SLC1A3, SLC1A1	1244	3	13528	10.8746	1	0.276292	35.425
GOTERM_BP_FAT	GO:0014051~gamma-aminobutyric acid secretion	3	0.169396	0.0237612	CACNB4, CACNA1A, APBA1	1244	3	13528	10.8746	1	0.276292	35.425
GOTERM_BP_FAT	GO:0010880~regulation of release of sequestered calcium ion into cytosol by sarcoplasmic reticulum	3	0.169396	0.0237612	CALM3, RYR2, FKBP1B, CALM1	1244	3	13528	10.8746	1	0.276292	35.425
GOTERM_BP_FAT	GO:0070777~D-aspartate transport	3	0.169396	0.0237612	SLC1A2, SLC1A3, SLC1A1	1244	3	13528	10.8746	1	0.276292	35.425
GOTERM_BP_FAT	GO:0048511~rhythmic process	20	1.12931	0.02463	KCNMA1, BMP2, DRD2, HS3ST2, HES7, GRIN3A, ARNTL, VGF, SOHLH1, INHBA, CRY2, PTGDS, CCND2, AGT, CRH, CARTPT, PER1, CHRNB2, NFIL3, ENOX1	1244	128	13528	1.69916	1	0.283925	36.4623
GOTERM_BP_FAT	GO:0032535~regulation of cellular component size	36	2.03275	0.0246676	FGFR2, PLXNA3, SHROOM2, FGFR3, ACTR3B, INS-IGF2, FHL1, ELN, PPARG, ATP2B2, ACVR1B, TMSB15A, NDRG3, INS, NDRG4, PTK2B, CDKN2D, AGT, MAPT, NRG1, DCX, GNG4, DCLK1, CRYAB, SPTBN4, IGF2, EPB49, CSRP2, PPP1R9B, INHBA, ATP6V0E2, ADRA1B, SPTBN2, HBEGF, APBB1, CACNA1A, ADD2, SPTB	1244	271	13528	1.4446	1	0.283321	36.5068
GOTERM_BP_FAT	GO:0014073~response to tropane	6	0.338792	0.0253532	GRM2, SLC6A1, DRD2, PTK2B, ADRA1B, CHRNB2	1244	19	13528	3.43408	1	0.289026	37.3136
GOTERM_BP_FAT	GO:0060079~regulation of excitatory postsynaptic membrane potential	6	0.338792	0.0253532	GRIK2, GRIN2C, SNCA, GRIN1, PPP3CA, ADORA1	1244	19	13528	3.43408	1	0.289026	37.3136
GOTERM_BP_FAT	GO:0042596~fear response	6	0.338792	0.0253532	PENK, GRIK2, GRM7, GABRA5, ADRA2A, GNG7	1244	19	13528	3.43408	1	0.289026	37.3136
GOTERM_BP_FAT	GO:0001975~response to amphetamine	6	0.338792	0.0253532	GNAL, DRD2, GRIN1, ADRA1B, PPP3CA, HPRT1	1244	19	13528	3.43408	1	0.289026	37.3136
GOTERM_BP_FAT	GO:0042220~response to cocaine	6	0.338792	0.0253532	GRM2, SLC6A1, DRD2, PTK2B, ADRA1B, CHRNB2	1244	19	13528	3.43408	1	0.289026	37.3136
GOTERM_BP_FAT	GO:0051494~negative regulation of cytoskeleton organization	11	0.621118	0.0266334	DLC1, SHROOM2, ARHGEF2, TMSB15A, MAPT, SPTBN4, SPTBN2, EPB49, ADD2, SPTB, MAP6D1	1244	55	13528	2.17492	1	0.30032	38.7942
GOTERM_BP_FAT	GO:0008037~cell recognition	11	0.621118	0.0266334	AMIGO1, NRCAM, CSGALNACT1, CDK5R1, EFNB3, OPCML, FOXG1, CELSR3, CNTNAP2, CNTN4, GAP43	1244	55	13528	2.17492	1	0.30032	38.7942
GOTERM_BP_FAT	GO:0050796~regulation of insulin secretion	9	0.508187	0.0268639	STX1A, GCK, NNAT, IL1B, NEUROD1, TRH, AACS, KCNJ11, SNAP25	1244	40	13528	2.44678	1	0.301499	39.0573
GOTERM_BP_FAT	GO:0001932~regulation of protein amino acid phosphorylation	25	1.41163	0.0269526	PRKCZ, INS-IGF2, FKBP1A, ZEB2, PRKAR2B, MAP3K5, PTK2B, INS, MAP3K9, AGT, IL1B, RAPGEF4, PAK1, BMP2, IGF2, PRKCE, ACVR2A, PPP1R9B, P2RX7, CCND2, PRKAR1B, MAPK15, MAP3K10, PDGFRB, PEBP1, MAPK8IP1, TNK2	1244	173	13528	1.57147	1	0.301332	39.1582
GOTERM_BP_FAT	GO:0022898~regulation of transmembrane transporter activity	7	0.395257	0.0275927	JPH4, INS-IGF2, INS, DRD2, CALM3, FKBP1A, IGF2, CACNB4, FKBP1B, CALM1	1244	26	13528	2.92778	1	0.306326	39.882
GOTERM_BP_FAT	GO:0045766~positive regulation of angiogenesis	7	0.395257	0.0275927	F3, IL1B, RHOB, HDAC9, VASH2, DDAH1, ANGPTL4	1244	26	13528	2.92778	1	0.306326	39.882
GOTERM_BP_FAT	GO:0046578~regulation of Ras protein signal transduction	29	1.63749	0.0287508	DLC1, HRAS, TBC1D9, LPAR2, CYTH3, MCF2L, ADAP1, AGAP8, PTK2B, TBC1D30, IQSEC3, AGAP2, IQSEC1, AGAP3, ARHGEF10L, ARHGEF4, ARHGEF2, ABR, STMN3, MCF2, KIAA1244, ARHGEF7, ARHGEF9, VAV2, SGSM1, PSD, RASGRF1, EVI5L, KALRN	1244	210	13528	1.50173	1	0.316014	41.1709
GOTERM_BP_FAT	GO:0007018~microtubule-based movement	18	1.01637	0.0287841	KIFC2, DYNC1I1, PRKCZ, KIF3B, KIF12, KIF5A, TUBB2A, KIF17, UCHL1, KIF5C, KLC2, KIF3C, KIFC3, KIF1A, MC1R, KIF26A, KIF21B, APBA1, TUBB3	1244	113	13528	1.73224	1	0.315291	41.2076
GOTERM_BP_FAT	GO:0010324~membrane invagination	30	1.69396	0.0301967	RAB3A, HRAS, HIP1R, SNCA, ADORA1, APLP1, AMPH, ASGR1, SYP, PACSIN1, ELMOD1, HIP1, SH3GL3, MICALL2, RAMP2, ARC, ICAM5, LRP1B, LRRN3, STXBP1, ELMO2, ELMO1, LMBR1L, P2RX7, GRIA1, GRK4, BIN1, LRP3, SH3GL2, DNM1	1244	220	13528	1.4829	1	0.327041	42.7434
GOTERM_BP_FAT	GO:0006897~endocytosis	30	1.69396	0.0301967	RAB3A, HRAS, HIP1R, SNCA, ADORA1, APLP1, AMPH, ASGR1, SYP, PACSIN1, ELMOD1, HIP1, SH3GL3, MICALL2, RAMP2, ARC, ICAM5, LRP1B, LRRN3, STXBP1, ELMO2, ELMO1, LMBR1L, P2RX7, GRIA1, GRK4, BIN1, LRP3, SH3GL2, DNM1	1244	220	13528	1.4829	1	0.327041	42.7434
GOTERM_BP_FAT	GO:0007015~actin filament organization	13	0.734049	0.03022	ACTC1, ARHGEF2, WASF1, ELN, EVL, EPB49, PROX1, GAS7, PPP1R9B, RND1, SORBS1, PTK2B, ADD2	1244	72	13528	1.96347	1	0.326203	42.7684
GOTERM_BP_FAT	GO:0045471~response to ethanol	12	0.677583	0.0302632	ACTC1, EPS8, CCND2, DRD2, PTK2B, FYN, GRIN1, PEBP1, CHRNB2, GRIN3A, TRH, AACS	1244	64	13528	2.03899	1	0.325549	42.8148
GOTERM_BP_FAT	GO:0043092~L-amino acid import	4	0.225861	0.0304675	SLC1A2, SLC1A3, SLC6A1, SLC1A1	1244	8	13528	5.4373	1	0.326329	43.0335
GOTERM_BP_FAT	GO:0060314~regulation of ryanodine-sensitive calcium-release channel activity	4	0.225861	0.0304675	JPH4, CALM3, FKBP1A, FKBP1B, CALM1	1244	8	13528	5.4373	1	0.326329	43.0335
GOTERM_BP_FAT	GO:0043090~amino acid import	4	0.225861	0.0304675	SLC1A2, SLC1A3, SLC6A1, SLC1A1	1244	8	13528	5.4373	1	0.326329	43.0335
GOTERM_BP_FAT	GO:0007016~cytoskeletal anchoring at plasma membrane	4	0.225861	0.0304675	TLN2, DMD, SPTBN4, SHANK1	1244	8	13528	5.4373	1	0.326329	43.0335
GOTERM_BP_FAT	GO:0043242~negative regulation of protein complex disassembly	9	0.508187	0.030781	SHROOM2, ARHGEF2, MAPT, SPTBN4, SPTBN2, EPB49, ADD2, SPTB, MAP6D1	1244	41	13528	2.38711	1	0.328065	43.3675
GOTERM_BP_FAT	GO:0010648~negative regulation of cell communication	33	1.86335	0.0309846	DLC1, PRKCZ, ACHE, SLC6A1, RGS7BP, GRIK2, DRD2, FGF9, GRIK3, ADORA1, KCNQ4, BCHE, HTRA1, AGT, IL1B, KLK14, STMN3, STXBP1, FRZB, DKK4, THY1, DKK3, P2RX7, GRB10, BMPER, RGS4, ZFYVE28, PEBP1, RGS7, GRK4, MAPK8IP1, GRB14, HTR2A	1244	248	13528	1.44702	1	0.328822	43.5835
GOTERM_BP_FAT	GO:0031333~negative regulation of protein complex assembly	8	0.451722	0.0322918	PRKCZ, TMSB15A, CLU, SPTBN4, SPTBN2, EPB49, ADD2, SPTB	1244	34	13528	2.55873	1	0.339146	44.9516
GOTERM_BP_FAT	GO:0034762~regulation of transmembrane transport	7	0.395257	0.0328057	JPH4, INS-IGF2, INS, DRD2, CALM3, FKBP1A, IGF2, CACNB4, FKBP1B, CALM1	1244	27	13528	2.81934	1	0.342502	45.4809
GOTERM_BP_FAT	GO:0051954~positive regulation of amine transport	5	0.282326	0.0335842	P2RX7, DRD2, CARTPT, CHRNB2, TRH	1244	14	13528	3.88379	1	0.348055	46.2734
GOTERM_BP_FAT	GO:0007263~nitric oxide mediated signal transduction	5	0.282326	0.0335842	AGT, GUCY1A3, NEUROD1, GUCY1B3, DDAH1	1244	14	13528	3.88379	1	0.348055	46.2734
GOTERM_BP_FAT	GO:0035249~synaptic transmission, glutamatergic	5	0.282326	0.0335842	SLC1A4, GRIN2D, GRIN1, CACNB4, CACNA1A	1244	14	13528	3.88379	1	0.348055	46.2734
GOTERM_BP_FAT	GO:0006163~purine nucleotide metabolic process	26	1.4681	0.034199	ADCY3, ATP1B1, ADCY1, ADCY2, ATP10B, ATP1B2, ADCY8, ADCY5, ADCY6, ATP6V1B2, CACNB4, HPRT1, ATP6V0B, ATP2B2, ATP2B3, GUCY1A2, GUCY1A3, NT5E, AK1, ATP1A3, AK5, ATP1A2, ATP6V0E2, ATP8A2, GUCY1B3, ATP8A1	1244	186	13528	1.52011	1	0.352158	46.8916
GOTERM_BP_FAT	GO:0043254~regulation of protein complex assembly	15	0.846979	0.0346894	PRKCZ, ACTR3B, SPTBN4, ELN, CLU, STXBP1, EPB49, CTTNBP2, TMSB15A, MAPT, TPPP, SPTBN2, MDN1, ADD2, SPTB	1244	90	13528	1.81243	1	0.355175	47.3799
GOTERM_BP_FAT	GO:0044093~positive regulation of molecular function	68	3.83964	0.0349069	DLC1, ADCY3, EDN3, ADCY1, ADCY2, INS-IGF2, ADCY8, ADCY5, ADCY6, ZEB2, LPAR2, ADORA1, PRKAR2B, MAP3K5, CERKL, MAP3K9, RGN, IL1B, PAK1, NRG1, PICK1, GRM1, NLRP1, THY1, GRM5, TNNT2, CRHR1, GNAL, GRM4, CCND2, CHRM2, RASGRF1, CHRM1, F3, GADD45G, MAP3K10, CARTPT, ADD2, GAP43, PRKCZ, DRD2, FCER2, ADCYAP1R1, FKBP1A, KIT, GPR3, MOAP1, DGKE, SMARCB1, INS, PTK2B, NPM2, AGT, ADRA2A, ADRA2C, CAMK2A, HIP1, CAP…	1244	586	13528	1.2619	1	0.355906	47.5951
GOTERM_BP_FAT	GO:0007588~excretion	11	0.621118	0.0370867	CLDN16, KCNMA1, TRPV1, DRD2, AGT, AQP4, CHRNB2, NEDD4L, AQP1, CACNA1C, ADORA1	1244	58	13528	2.06242	1	0.372585	49.7064
GOTERM_BP_FAT	GO:0001666~response to hypoxia	20	1.12931	0.0374088	KCNMA1, TF, ATP1B1, SLC8A1, SMAD9, CYP1A1, EPAS1, PDIA2, ALDOC, ARNT2, JAG2, TRH, ITPR1, PTK2B, RYR1, RYR2, CHRNA4, CHRNB2, ANGPTL4, MT3	1244	134	13528	1.62307	1	0.374068	50.0116
GOTERM_BP_FAT	GO:0043085~positive regulation of catalytic activity	61	3.44438	0.0380528	DLC1, ADCY3, EDN3, ADCY1, ADCY2, INS-IGF2, ADCY8, ADCY5, ADCY6, ZEB2, LPAR2, ADORA1, PRKAR2B, MAP3K5, CERKL, MAP3K9, RGN, IL1B, PAK1, NRG1, PICK1, GRM1, NLRP1, THY1, TNNT2, CRHR1, GRM5, GNAL, GRM4, CCND2, CHRM2, RASGRF1, CHRM1, F3, GADD45G, MAP3K10, CARTPT, GAP43, PRKCZ, DRD2, FCER2, ADCYAP1R1, KIT, GPR3, MOAP1, DGKE, INS, PTK2B, NPM2, AGT, ADRA2A, ADRA2C, HIP1, CAP2, GNAO1, MET, LRRN3, IGF2, VAV…	1244	520	13528	1.27567	1	0.378089	50.6162
GOTERM_BP_FAT	GO:0001659~temperature homeostasis	6	0.338792	0.0380904	TRPV1, DRD2, IL1B, ADORA1, HTR2A, EPHA3	1244	21	13528	3.10703	1	0.377286	50.6513
GOTERM_BP_FAT	GO:0051017~actin filament bundle formation	6	0.338792	0.0380904	SORBS1, PTK2B, ELN, EPB49, GAS7, ADD2	1244	21	13528	3.10703	1	0.377286	50.6513
GOTERM_BP_FAT	GO:0009409~response to cold	6	0.338792	0.0380904	DIO2, AGT, PPARG, TRH, PCSK1N, VGF	1244	21	13528	3.10703	1	0.377286	50.6513
GOTERM_BP_FAT	GO:0031345~negative regulation of cell projection organization	7	0.395257	0.0386174	MAG, LINGO1, PLXNA3, YWHAH, RTN4R, MBP, THY1	1244	28	13528	2.71865	1	0.380333	51.1407
GOTERM_BP_FAT	GO:0003014~renal system process	7	0.395257	0.0386174	KCNMA1, TRPV1, DRD2, AGT, CHRNB2, CACNA1C, ADORA1	1244	28	13528	2.71865	1	0.380333	51.1407
GOTERM_BP_FAT	GO:0008277~regulation of G-protein coupled receptor protein signaling pathway	10	0.564653	0.040887	RAMP2, DRD2, RGS4, GPSM1, TMOD2, RGS7, GRK4, GNG4, KLK14, GNG7	1244	51	13528	2.13227	1	0.39675	53.1964
GOTERM_BP_FAT	GO:0001662~behavioral fear response	5	0.282326	0.0425572	PENK, GRIK2, GRM7, GABRA5, GNG7	1244	15	13528	3.62487	1	0.408202	54.6567
GOTERM_BP_FAT	GO:0021955~central nervous system neuron axonogenesis	5	0.282326	0.0425572	DCC, CHRNB2, DCX, DCLK1, MYCBP2	1244	15	13528	3.62487	1	0.408202	54.6567
GOTERM_BP_FAT	GO:0002209~behavioral defense response	5	0.282326	0.0425572	PENK, GRIK2, GRM7, GABRA5, GNG7	1244	15	13528	3.62487	1	0.408202	54.6567
GOTERM_BP_FAT	GO:0051493~regulation of cytoskeleton organization	20	1.12931	0.0425928	DLC1, ARHGEF2, SHROOM2, STMN3, ACTR3B, ELN, SPTBN4, EPB49, PROX1, MYCBP2, CTTNBP2, P2RX7, TMSB15A, MAPT, SPTBN2, ARHGEF10L, ADD2, SPTB, SYNPO, MAP6D1	1244	136	13528	1.59921	1	0.407329	54.6874
GOTERM_BP_FAT	GO:0060004~reflex	4	0.225861	0.0426377	KCNMA1, GLRB, NR4A3, CACNA1A	1244	9	13528	4.83315	1	0.406529	54.726
GOTERM_BP_FAT	GO:0035235~ionotropic glutamate receptor signaling pathway	4	0.225861	0.0426377	CDK5R1, GRIN1, ATP1A3, GRIN3A	1244	9	13528	4.83315	1	0.406529	54.726
GOTERM_BP_FAT	GO:0048713~regulation of oligodendrocyte differentiation	4	0.225861	0.0426377	LINGO1, ZNF488, DLX1, PPARG	1244	9	13528	4.83315	1	0.406529	54.726
GOTERM_BP_FAT	GO:0016311~dephosphorylation	22	1.24224	0.0430629	PTPRE, PTPN3, PTPRN2, PTPN5, PTPRR, PTPRT, PTPRN, PTPRO, PTPRQ, DUSP5, EYA3, EYA1, DUSP26, DUSP13, PPEF1, PPM1K, DUSP14, SYNJ2, PPP3CA, DUSP9, DUSP8, DUSP7	1244	154	13528	1.55351	1	0.408545	55.0903
GOTERM_BP_FAT	GO:0043149~stress fiber formation	3	0.169396	0.0446391	SORBS1, PTK2B, ELN	1244	4	13528	8.15595	1	0.418918	56.4167
GOTERM_BP_FAT	GO:0014052~regulation of gamma-aminobutyric acid secretion	3	0.169396	0.0446391	P2RX7, HRH3, TRH	1244	4	13528	8.15595	1	0.418918	56.4167
GOTERM_BP_FAT	GO:0016198~axon choice point recognition	3	0.169396	0.0446391	EFNB3, FOXG1, GAP43	1244	4	13528	8.15595	1	0.418918	56.4167
GOTERM_BP_FAT	GO:0060083~smooth muscle contraction involved in micturition	3	0.169396	0.0446391	KCNMA1, TRPV1, CACNA1C	1244	4	13528	8.15595	1	0.418918	56.4167
GOTERM_BP_FAT	GO:0032012~regulation of ARF protein signal transduction	9	0.508187	0.0448253	AGAP8, PSD, KIAA1244, CYTH3, IQSEC3, AGAP2, IQSEC1, AGAP3, ADAP1	1244	44	13528	2.22435	1	0.419121	56.5709
GOTERM_BP_FAT	GO:0010970~microtubule-based transport	7	0.395257	0.0450441	DYNC1I1, PRKCZ, KIF1A, KIF3B, UCHL1, KLC2, APBA1	1244	29	13528	2.6249	1	0.419557	56.7515
GOTERM_BP_FAT	GO:0006826~iron ion transport	7	0.395257	0.0450441	TF, FTLP2, TFR2, SFXN3, LTF, HEPH, SFXN5	1244	29	13528	2.6249	1	0.419557	56.7515
GOTERM_BP_FAT	GO:0007243~protein kinase cascade	45	2.54094	0.0452031	FGFR3, NRG3, INS-IGF2, DRD2, LPAR2, FGF13, KIT, ADORA1, CAMKK2, LINGO1, MAP3K5, INS, PTK2B, MAP3K9, ADRA2A, IL1B, ADRA2C, PAK1, SCG2, TNIK, CRYAB, PIK3C2B, MET, LRRN3, IGF2, MAPK10, WNK2, GRM1, SHANK3, MARK1, SH2D3C, GRM4, MAST1, P2RX7, DOK4, FYN, DOK5, RGS4, GADD45G, MAPK8IP2, ADRA1B, MAP3K10, CARTPT, MAPK9, MAPK8IP1, DUSP9, DUSP8	1244	370	13528	1.32259	1	0.419562	56.8823
GOTERM_BP_FAT	GO:0030705~cytoskeleton-dependent intracellular transport	10	0.564653	0.0455779	TNNT2, DYNC1I1, MYO5A, PRKCZ, KIF1A, ACTC1, KIF3B, UCHL1, KLC2, APBA1	1244	52	13528	2.09127	1	0.421102	57.189
GOTERM_BP_FAT	GO:0002027~regulation of heart rate	6	0.338792	0.0456896	EDN3, EPAS1, DRD2, ADRA1B, CACNA1G, FKBP1B	1244	22	13528	2.9658	1	0.420767	57.28
GOTERM_BP_FAT	GO:0007167~enzyme linked receptor protein signaling pathway	42	2.37154	0.0464921	FGFR2, FGFR4, FGFR3, INS-IGF2, FGF9, GRIK2, ADCYAP1R1, EPHA10, FKBP1A, KIT, ACVR1B, EPHB6, SORBS1, INS, PTK2B, PTN, TIE1, NRG1, GNG7, CNKSR1, BMP2, PTPRE, SMAD9, EFNB3, BAIAP2, MET, PICK1, IGF2, FGF22, PTPRT, EPHA3, ACVR2A, GRB10, CHRDL1, EPS8, DOK4, DOK5, NTRK2, MAPK8IP2, PDGFRB, GDF10, HBEGF, CACNA1A, GFRA2	1244	342	13528	1.33548	1	0.425297	57.9286
GOTERM_BP_FAT	GO:0043506~regulation of JUN kinase activity	8	0.451722	0.0487013	MAP3K5, PTK2B, MAP3K9, MAP3K10, IL1B, ZEB2, MAPK8IP1, PAK1	1244	37	13528	2.35126	1	0.439451	59.6666
GOTERM_BP_FAT	GO:0051971~positive regulation of transmission of nerve impulse	8	0.451722	0.0487013	PRKCZ, SLC1A3, GRIK2, SNCA, NTRK2, CARTPT, CHRNB2, LGI1	1244	37	13528	2.35126	1	0.439451	59.6666
GOTERM_BP_FAT	GO:0050954~sensory perception of mechanical stimulus	16	0.903444	0.0490256	DFNA5, RAB3A, TRPV1, SPTBN4, SOBP, GJB6, SLC26A4, ATP2B2, KCNQ4, EYA1, SLC1A3, FYN, MYO15A, GRM7, CHRNB2, COL11A1	1244	103	13528	1.68926	1	0.440515	59.9158
