# Supplementary figures and images for: Whole Exome- and mRNA-Sequencing of an AT/RT Case Reveals Few Somatic Mutations and Several Deregulated Signalling Pathways in the Context ofSMARCB1Deficiency
Source: Hindawi journal article supplement (doi:10.1155/2015/862039), 2015-01-01

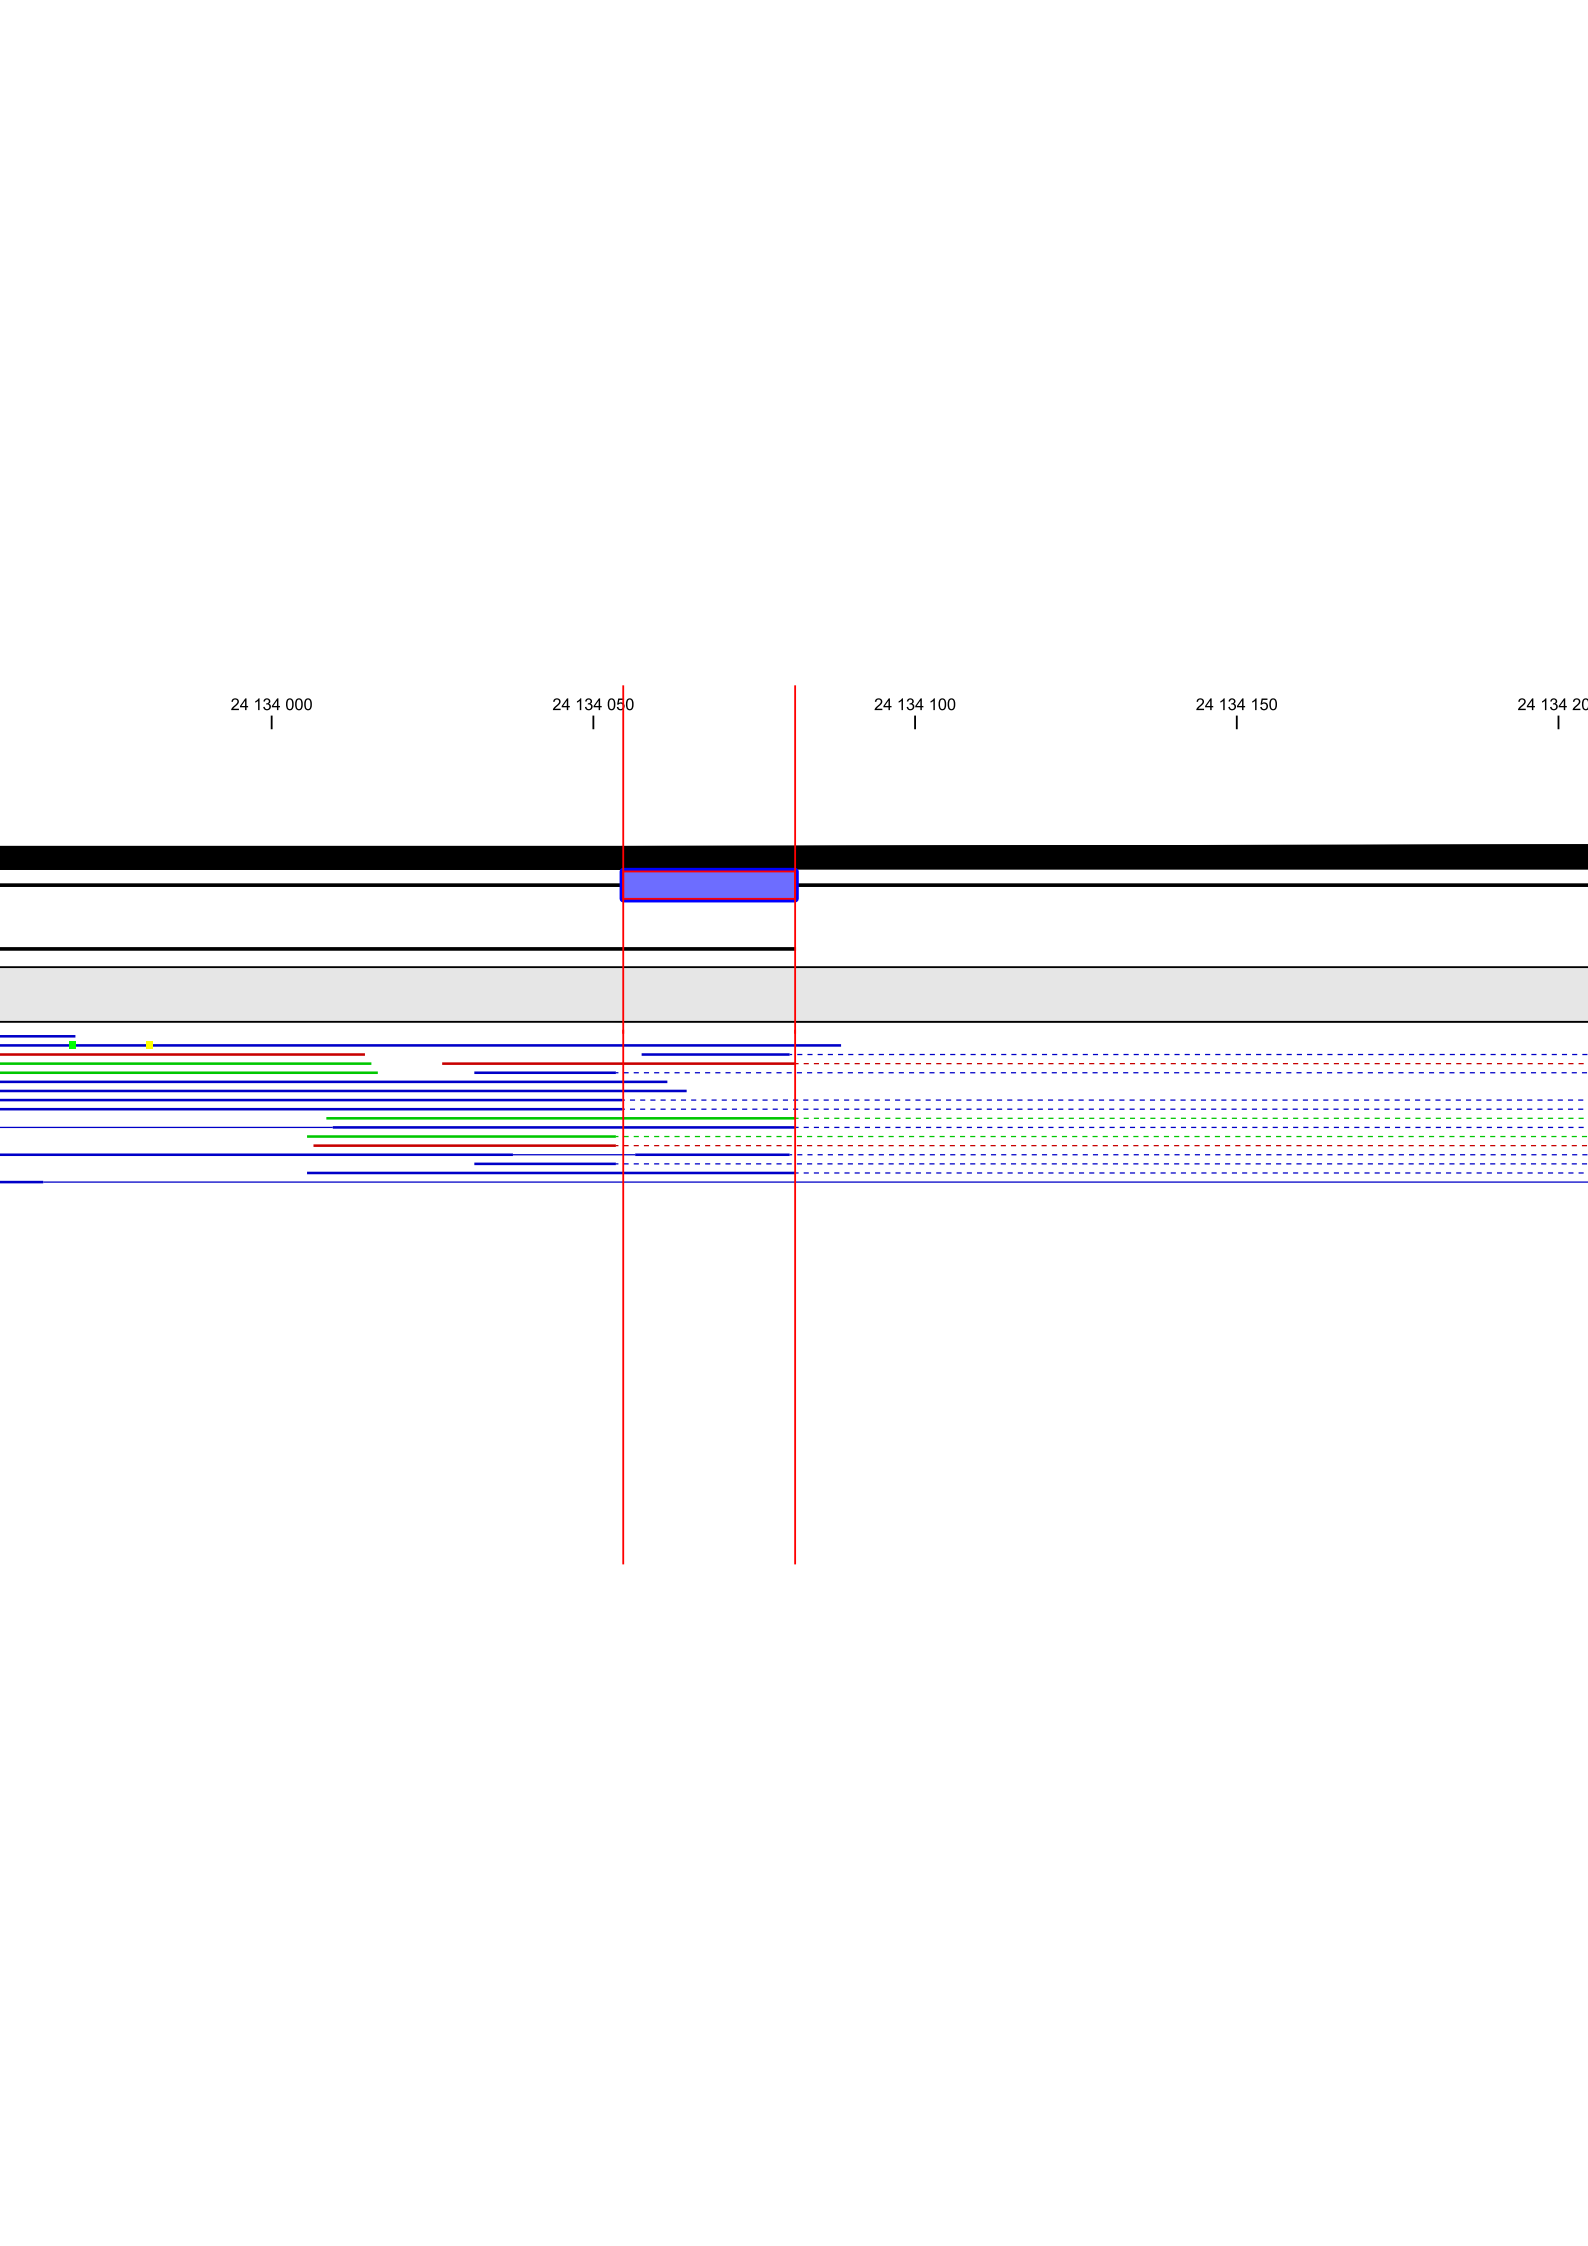

Supplement: f1 [file 862039.f1.zip]

# SMARCB1

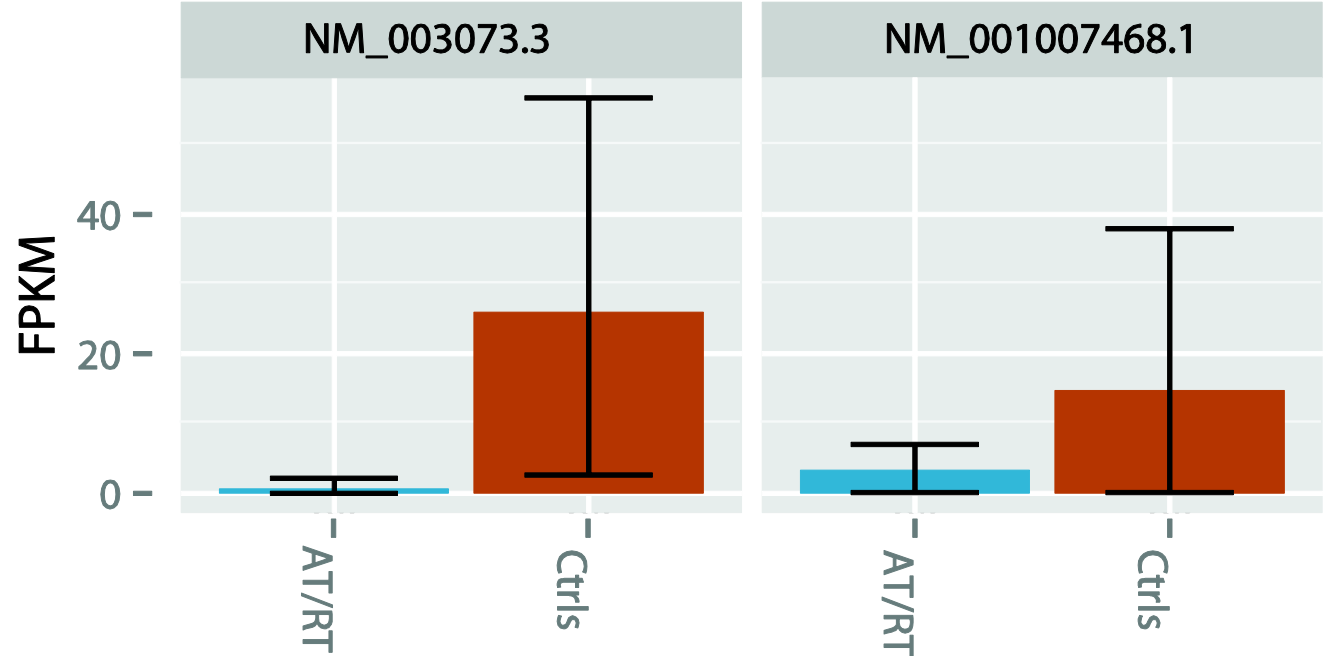

Supplement: f1 [file 862039.f1.zip]
